# Supplementary material for: Role of anterior insula cortex in context-induced relapse of nicotine-seeking
Source: eLife. 2022 May 10;11:e75609. doi: 10.7554/eLife.75609 (PMC9119676; doi:10.7554/eLife.75609)
Supplement: Figure 1—source data 1. [file elife-75609-fig1-data1.xlsx]

## Sheet: 1B
Self-administration (Exp. 1 - AI CTb group)
Experiment	Rat	Group	inf_1	inf_2	inf_3	inf_4	inf_5	inf_6	inf_7	inf_8	inf_9	inf_10	inf_11	inf_12	inf_13	inf_14	inf_15	act_1	act_2	act_3	act_4	act_5	act_6	act_7	act_8	act_9	act_10	act_11	act_12	act_13	act_14	act_15	inact_1	inact_2	inact_3	inact_4	inact_5	inact_6	inact_7	inact_8	inact_9	inact_10	inact_11	inact_12	inact_13	inact_14	inact_15
Nic_12	1	2	3	3	2	1	3	3	9	7	8	14	13	12	15	16	17	3	3	2	1	7	7	24	22	20	38	47	43	52	52	70	5	1	3	3	3	4	3	4	5	20	14	10	6	5	16
Nic_12	2	3	2	2	1	1	3	3	2	1	4	5	8	8	7	8	9	3	3	1	2	6	6	4	2	10	13	34	32	21	29	34	5	4	0	1	0	2	0	1	5	2	10	6	13	12	19
Nic_12	3	1	5	7	3	1	3	3	2	2	2	23	30	27	29	37	42	8	11	4	1	7	6	4	4	5	57	171	99	103	138	167	2	6	24	5	0	6	3	1	4	26	35	17	9	17	4
Nic_12	4	2	8	6	8	11	8	11	9	15	14	17	15	17	15	15	15	13	6	12	14	18	24	22	38	29	40	48	57	48	47	47	11	6	8	12	13	13	14	23	12	20	39	22	26	34	31
Nic_12	5	1	14	12	5	2	3	3	3	3	7	10	5	7	12	12	16	26	14	5	2	6	6	7	8	20	25	18	24	43	45	63	4	7	13	5	3	1	12	4	17	13	12	15	5	10	4
Nic_12	6	1	9	7	7	5	6	11	13	13	11	13	15	10	13	20	17	12	13	9	7	14	27	30	33	23	31	48	34	54	67	54	9	15	10	7	32	10	12	24	30	25	30	33	42	55	34
Nic_12	7	3	3	6	4	5	6	8	18	16	15	12	22	25	26	26	22	3	7	5	6	14	19	46	35	37	32	73	88	93	97	79	1	6	2	5	3	17	13	15	24	21	27	26	21	25	17
Nic_12	8	2	3	3	4	1	5	5	6	9	16	17	16	17	5	20	28	6	7	7	1	10	11	13	21	45	59	74	74	19	94	119	0	1	1	4	21	17	28	46	39	49	81	54	8	46	66
Nic_12	9	3	2	6	1	3	3	4	3	2	3	1	4	14	11	10	17	5	9	1	3	7	9	6	5	7	3	16	60	43	43	77	3	6	3	3	4	6	9	3	4	2	12	18	15	9	45
Nic_12	11	2	14	9	5	4	5	8	10	9	15	13	10	10	11	7	11	19	12	9	10	13	21	25	24	37	35	44	36	35	24	38	13	13	13	7	7	8	10	15	13	3	6	6	9	6	9
Nic_12	12	3	11	19	15	17	15	18	12	16	13	21	14	14	15	17	15	17	23	19	22	40	45	27	43	30	48	44	47	52	52	46	11	17	21	31	43	32	17	17	14	11	17	14	11	5	15
Nic_16	4	3	27	38	42	42	31	47	45	44	46	48	48	45	45	51	51	39	48	52	50	68	98	102	95	97	151	147	147	145	159	156	11	19	15	5	10	19	17	8	16	13	12	20	30	16	16
Nic_16	6	3	31	25	35	36	25	22	28	26	44	46	41	34	41	46	40	38	30	40	42	52	50	67	57	111	144	124	105	135	155	133	32	11	8	19	11	13	13	34	43	14	14	0	24	12	13
Nic_16	7	2	19	23	19	26	9	8	3	3	1	1	1	4	2	6	2	24	24	29	40	23	20	8	9	2	5	5	15	10	20	7	52	23	12	19	29	17	10	15	11	7	5	10	3	5	3
Nic_16	9	2	7	10	3	2	2	1	3	2	1	4	1	8	1	6	1	14	10	5	2	4	2	7	10	3	16	4	28	4	20	4	13	18	25	13	4	5	3	6	6	21	4	11	7	12	4
Nic_16	10	3	7	7	7	8	4	4	5	7	8	2	2	5	12	9	10	12	8	10	11	15	10	15	19	18	9	9	23	42	35	34	6	13	6	10	12	9	12	12	7	12	6	28	31	33	12
Nic_16	11	2	14	23	27	18	12	12	17	17	20	13	17	10	17	19	19	27	43	34	24	25	32	41	40	48	52	55	35	57	66	76	27	14	30	29	32	13	22	32	12	9	15	0	13	4	14
Nic_16	12	2	15	21	16	13	6	10	8	8	10	3	7	6	10	16	15	25	24	20	17	15	24	18	20	22	16	23	21	32	52	47	19	6	9	3	4	12	5	8	6	7	5	2	13	6	5
		(1=No Test; 2=PUN; 3=NIC)

## Sheet: 1C
Punishment (Exp. 1 - AI CTb group)
Experiment	Rat	Group	inf_1	inf_2	inf_3	inf_4	inf_5	inf_6	inf_7	act_1	act_2	act_3	act_4	act_5	act_6	act_7	inact_1	inact_2	inact_3	inact_4	inact_5	inact_6	inact_7
Nic_12	1	2	4	1	2	2	1	0	2	16	4	6	8	4	2	6	15	10	13	5	13	4	12
Nic_12	2	3	4	1	0	0	0	0	1	13	3	0	0	0	0	3	1	0	0	2	6	5	24
Nic_12	3	1	6	1	1	0	0	0	0	18	3	3	0	1	0	2	23	21	44	34	34	4	7
Nic_12	4	2	2	0	1	0	0	0	1	6	1	3	0	0	0	3	4	15	3	18	14	31	12
Nic_12	5	1	3	1	1	1	0	0	1	11	3	3	3	0	0	3	13	27	72	46	21	13	16
Nic_12	6	1	5	0	1	0	0	1	0	16	0	3	0	2	3	2	8	22	3	68	45	37	28
Nic_12	7	3	3	2	1	0	1	1	0	11	8	3	0	4	4	0	4	1	2	6	6	18	8
Nic_12	8	2	10	1	0	0	0	0	0	35	3	0	0	0	0	0	38	11	0	1	8	9	24
Nic_12	9	3	6	1	3	1	4	1	0	21	3	13	6	13	3	0	6	22	13	36	32	8	27
Nic_12	11	2	7	1	3	1	1	2	2	21	3	10	3	3	8	6	44	19	69	21	21	55	12
Nic_12	12	3	3	2	4	0	1	1	0	13	6	12	0	3	3	0	2	9	18	19	22	24	19
Nic_16	4	3	9	1	1	3	1	1	2	28	3	3	10	3	3	6	21	17	10	14	7	9	8
Nic_16	6	3	6	3	7	3	0	0	1	24	10	24	9	1	0	3	15	17	13	19	9	10	7
Nic_16	7	2	10	7	4	2	3	0	1	42	32	16	9	14	2	3	21	25	12	29	12	5	23
Nic_16	9	2	10	6	1	1	2	4	4	43	22	5	5	6	18	15	13	18	9	2	12	12	18
Nic_16	10	3	9	3	1	2	0	0	0	32	11	5	6	0	1	2	14	18	15	10	8	11	9
Nic_16	11	2	3	1	1	1	0	1	0	10	5	4	3	0	3	0	7	5	6	1	13	14	27
Nic_16	12	2	6	0	2	1	0	1	0	20	2	8	3	0	3	0	4	4	3	0	0	6	1
		(1=No Test; 2=PUN; 3=NIC)

## Sheet: 1D
TEST (Exp. 1 - AI CTb group)
Experiment	Rat	Group	act_1	inact_1
Nic_12	1	2	0	3
Nic_12	2	3	57	33
Nic_12	3	1
Nic_12	4	2	3	12
Nic_12	5	1
Nic_12	6	1
Nic_12	7	3	50	38
Nic_12	8	2	10	23
Nic_12	9	3	55	49
Nic_12	11	2	36	25
Nic_12	12	3	67	21
Nic_16	4	3	39	7
Nic_16	6	3	41	12
Nic_16	7	2	11	23
Nic_16	9	2	46	13
Nic_16	10	3	23	27
Nic_16	11	2	0	14
Nic_16	12	2	0	1
		(1=No Test; 2=PUN; 3=NIC)

## Sheet: 1G
FOS - CTB - %CTB+FOS (Exp. 1 - AI CTb group)
Experiment	Rat	Group	Fos_aIC_Ipsi	Fos_mIC_Ipsi	Fos_pIC_Ipsi	CTb_mIC_Ipsi	CTb_pIC_Ipsi	Double_mIC_Ipsi	Double_pIC_Ipsi
Nic_12	R01	2	41.251	34.088	16.4411	238.308	144.494	0.0231523	0.0159263
Nic_12	R02	3	138.223	66.8118	45.1742	104.87	69.3142	0.106215	0.0652961
Nic_12	R03	1	6.051	5.41961	2.29831	239.327	197.288	0.00501507	0.000924775
Nic_12	R04	2	59.4166	44.0148	25.5656	269.433	218.151	0.0236794	0.0175397
Nic_12	R05	1	39.7153	21.0874	16.2243	74.5381	47.4867	0.0381625	0.0273525
Nic_12	R06	1	12.7636	10.9614	5.21177	241.264	143.648	0.0170198	0.00533689
Nic_12	R07	3	107.958	65.6181	57.4444	65.2982	76.3714	0.0765797	0.0666695
Nic_12	R08	2	62.1019	27.4489	19.8417	118.203	137.231	0.0313618	0.0226115
Nic_12	R09	3	82.1793	46.7628	34.8233	156.603	167.031	0.0521332	0.0379336
Nic_12	R11	2	61.6311	33.8082	36.0289	95.2738	83.1024	0.0628177	0.0489637
Nic_12	R12	3	139.368	63.5698	54.0469	435.185	397.776	0.0575462	0.0475288
Nic_16	R04	3	54.8931	53.5987	55.4245	164.502	132.564	0.0379795	0.0261391
Nic_16	R06	3	104.961	67.1657	37.3869	240.521	199.99	0.0386801	0.0302233
Nic_16	R10	3	78.5018	66.1827	53.1263	122.162	57.9636	0.0515198	0.0363291
Nic_16	R07	2	80.1523	52.8185	36.2757	152.206	137.974	0.0310484	0.0326939
Nic_16	R09	2	50.8106	18.7606	57.7654	189.732	290.649	0.0129831	0.033782
Nic_16	R11	2	91.1335	71.3788	60.0291	508.326	373.931	0.038468	0.0315955
Nic_16	R12	2	72.1362	67.491	23.5627	244.843	174.219	0.0526911	0.0169026
		(1=No Test; 2=PUN; 3=NIC)

## Sheet: 1H
FOS - CTB - %CTB+FOS (Exp. 1 - AI CTb group)
Experiment	Rat	Group	aIC_Fos_Contra	mIC_Fos_Contra	pIC_Fos_Contra	aIC_CTb_Contra	mIC_CTb_Contra	pIC_CTb_Contr	aIC_CTBFos_Contra	mIC_CTBFos_Contra	pIC_CTBFos_Contra
Nic_12	R01	2	62.4503	50.1678	18.001	162.411	13.6595	10.2161	0.0251831	0.0718599	0
Nic_12	R02	3	144.716	64.5119	49.7855	54.2237	10.0071	15.5755	0.16435	0.149074	0.0347756
Nic_12	R03	1	4.93393	3.4376	2.52892	56.6651	10.6473	10.0637	0.0135855	0.0230159	0
Nic_12	R04	2	73.748	55.3716	24.8612	91.4892	12.8388	39.424	0.0442245	0.106518	0.0283467
Nic_12	R05	1	37.9898	33.0666	18.2606	21.2266	6.85099	12.3869	0.0229003	0.0361111	0.0195375
Nic_12	R06	1	10.7268	9.85123	5.17016	42.7131	22.605	17.5305	0.0149079	0.00555556	0
Nic_12	R07	3	122.103	70.4224	57.2714	48.8529	11.1361	23.1335	0.0869751	0.104703	0.0520025
Nic_12	R08	2	44.3652	40.2017	21.6246	38.1248	12.261	20.4585	0.0576544	0.0699074	0.0351852
Nic_12	R09	3	81.2565	47.9042	39.4937	11.878	17.4108	25.3496	0.228876	0.0686846	0.078649
Nic_12	R11	2	76.7342	42.1342	32.8385	13.5125	33.6788	44.0016	0.0602449	0.0677832	0.0551074
Nic_12	R12	3	144.36	56.8446	42.0542	23.5523	33.5792	51.4819	0.185403	0.0680058	0.0583419
Nic_16	R04	3	94.2927	36.3707	48.7109	79.7161	7.97056	5.12496	0.0611204	0.0707071	0.117328
Nic_16	R06	3	167.141	87.3397	55.2393	95.3609	18.7503	13.6582	0.0677559	0.0617603	0.0382206
Nic_16	R10	3	69.295	67.0673	46.888	35.0065	16.3023	6.70414	0.0478511	0.0441725	0
Nic_16	R07	2	106.8	73.8696	46.131	69.9391	16.1677	17.7194	0.0440434	0.0277994	0.0744883
Nic_16	R09	2	79.3983	19.4754	24.1382	71.5847	31.5488	26.9876	0.0307482	0.0151918	0.0425318
Nic_16	R11	2	87.9585	64.3757	46.0539	128.734	62.77	25.0996	0.0565424	0.0589269	0.0336988
Nic_16	R12	2	55.2038	46.4972	23.4818	121.117	27.0168	16.6971	0.0317119	0.0393939	0.148978
		(1=No Test; 2=PUN; 3=NIC)

## Sheet: 1I
FOS - CTB - %CTB+FOS (Exp. 1 - AI CTb group)
Experiment	Rat	Group	aBLA_Fos	pBLA_Fos	aBLA_CTb	pBLA_CTb	aBLA_CTbFos	pBLA_CTbFos
Nic_12	R01	2	14.3652	13.6793	177.504	114.871	0.0104993	0.0122893
Nic_12	R02	3	34.3833	52.2623	158.235	172.204	0.0455982	0.0609983
Nic_12	R03	1	2.05987	2.4235	304.243	169.967	0.00440699	0.00243547
Nic_12	R04	2	18.5442	24.1097	223.624	111.46	0.0159959	0.0171019
Nic_12	R05	1	14.59	25.0059	50.5437	20.4821	0.0240756	0.0236985
Nic_12	R06	1	6.95085	4.49555	171.606	80.6223	0.00603669	0
Nic_12	R07	3	41.8552	46.4167	69.2665	30.9905	0.0521601	0.0739496
Nic_12	R08	2	29.1691	19.6166	80.081	60.3614	0.0047619	0.0367655
Nic_12	R09	3	32.4565	50.6217	143.998	76.105	0.0552045	0.0771947
Nic_12	R11	2	16.3404	27.6167	94.6469	42.5604	0.0374417	0.0447433
Nic_12	R12	3	50.7669	47.2838	401.986	239.225	0.0452187	0.0557445
Nic_16	R04	3	25.6478	33.4522	61.7586	71.242	0.0365881	0.00680272
Nic_16	R06	3	52.1415	111.501	92.9795	82.5494	0.0859993	0.173453
Nic_16	R10	3	50.0613	50.1702	54.6041	18.1176	0.0814723	0.0870231
Nic_16	R07	2	8.03783	14.5223	58.832	30.5258	0	0.0512821
Nic_16	R09	2	30.6138	53.763	90.2187	103.015	0.0365797	0.0757989
Nic_16	R11	2	5.18224	23.0926	99.2965	106.434	0	0.0226954
Nic_16	R12	2	16.3486	19.0059	77.5855	59.9191	0.0322478	0.0311808
		(1=No Test; 2=PUN; 3=NIC)
