# Supplementary material for: Role of anterior insula cortex in context-induced relapse of nicotine-seeking
Source: eLife. 2022 May 10;11:e75609. doi: 10.7554/eLife.75609 (PMC9119676; doi:10.7554/eLife.75609)
Supplement: Figure 2—figure supplement 1—source data 1. [file elife-75609-fig2-figsupp1-data1.xlsx]

## Sheet: S2A
Self-administration (Exp. 2 - AI Photom group)		FR1									FR2											FR3
		Permutation Tests				Bootstrap tests					Permutation Tests				Bootstrap tests							Permutation Tests				Bootstrap tests
Time			REW-INAC			REW		INAC			REW-AC	REW-INAC	AC-INAC		REW		AC		INAC			REW-AC	REW-INAC	AC-INAC		REW		AC		INAC
-5			0.761239			-0.269722	0.27529	-0.382605	0.33727		0.547453	0.145854	0.293706		-0.236228	0.381569	-0.0811024	0.52951	-0.422725	0.356591		0.799201	0.386613	0.231768		-0.231177	0.190236	-0.0666022	0.226061	-0.209463	0.233483
-4.93724			0.558442			-0.252083	0.277392	-0.3721	0.264432		0.253746	0.045954	0.278721		-0.210258	0.389322	-0.0248564	0.543904	-0.410016	0.308284		0.969031	0.498501	0.442557		-0.224379	0.186114	-0.087846	0.193163	-0.218244	0.199607
-4.87448			0.502498			-0.234361	0.266601	-0.347382	0.21427		0.12987	0.048951	0.563437		-0.14434	0.439297	-0.0619854	0.505555	-0.391848	0.297269		0.989011	0.604396	0.587413		-0.197771	0.183993	-0.0971349	0.177761	-0.206072	0.189959
-4.81172			0.508492			-0.230412	0.257483	-0.337399	0.198829		0.102897	0.115884	0.961039		-0.113621	0.418561	-0.127245	0.427254	-0.379412	0.268585		0.809191	0.747253	0.539461		-0.185746	0.177103	-0.0965531	0.175225	-0.200806	0.207534
-4.74895			0.613387			-0.248434	0.239539	-0.321197	0.226018		0.175824	0.192807	0.981019		-0.13755	0.352104	-0.185722	0.360111	-0.378057	0.235586		0.566434	0.872128	0.415584		-0.1936	0.175413	-0.0782959	0.175445	-0.17277	0.220815
-4.68619			0.755245			-0.249528	0.212322	-0.32693	0.249376		0.297702	0.176823	0.716284		-0.214773	0.321481	-0.176401	0.337535	-0.380811	0.230742		0.527473	0.96004	0.435564		-0.189135	0.179606	-0.0862588	0.168548	-0.163182	0.233014
-4.62343			0.962038			-0.25858	0.196766	-0.290328	0.258836		0.360639	0.0929071	0.410589		-0.279796	0.273426	-0.149569	0.330933	-0.391642	0.186947		0.624376	0.982018	0.586414		-0.181692	0.166322	-0.0989701	0.148096	-0.170079	0.212584
-4.56067			0.701299			-0.2421	0.187479	-0.24297	0.295559		0.35964	0.0639361	0.322677		-0.284234	0.265326	-0.161245	0.342241	-0.416932	0.172506		0.711289	0.922078	0.72028		-0.181123	0.136866	-0.118879	0.11766	-0.179052	0.174545
-4.49791			0.552448			-0.220046	0.170594	-0.22809	0.297978		0.480519	0.137862	0.360639		-0.278369	0.235225	-0.19745	0.332913	-0.403194	0.182852		0.619381	0.874126	0.706294		-0.178827	0.131954	-0.124646	0.106121	-0.170797	0.176937
-4.43515			0.526474			-0.22925	0.16309	-0.22334	0.290059		0.986014	0.401598	0.326673		-0.284269	0.219267	-0.213648	0.32252	-0.336288	0.240696		0.48951	0.829171	0.587413		-0.189271	0.135871	-0.11411	0.126241	-0.1544	0.196419
-4.37238			0.54046			-0.239229	0.16442	-0.235814	0.263388		0.355644	0.709291	0.127872		-0.307473	0.156197	-0.170617	0.34451	-0.243016	0.349516		0.541459	0.907093	0.603397		-0.180972	0.143871	-0.10329	0.129112	-0.154405	0.200638
-4.30962			0.552448			-0.262499	0.148509	-0.257719	0.2605		0.147852	0.65035	0.022977		-0.290426	0.147178	-0.0868873	0.395227	-0.214638	0.430275		0.761239	0.99001	0.715285		-0.166432	0.150393	-0.106795	0.123285	-0.169311	0.195147
-4.24686			0.506494			-0.285498	0.132388	-0.26014	0.25794		0.210789	0.300699	0.00799201		-0.295381	0.180539	-0.0280372	0.442064	-0.239258	0.417592		0.895105	0.916084	0.8002		-0.168985	0.134148	-0.104916	0.116248	-0.175322	0.173325
-4.1841			0.460539			-0.281976	0.136637	-0.233072	0.285489		0.564436	0.0549451	0.00899101		-0.302702	0.230719	0.00746662	0.441774	-0.29551	0.338112		0.617383	0.954046	0.587413		-0.193504	0.107099	-0.131158	0.107611	-0.160586	0.163658
-4.12134			0.463536			-0.258497	0.171516	-0.217787	0.288825		0.927073	0.018981	0.013986		-0.294635	0.222484	0.0100913	0.428347	-0.321512	0.250192		0.161838	0.625375	0.302697		-0.231417	0.0622191	-0.154804	0.103285	-0.153436	0.191502
-4.05858			0.638362			-0.212333	0.220866	-0.212345	0.28489		0.766234	0.046953	0.017982		-0.302096	0.17163	-0.0459876	0.397181	-0.33141	0.231024		0.040959	0.27972	0.181818		-0.261765	0.0502649	-0.142394	0.0951148	-0.117416	0.218479
-3.99582			0.989011			-0.158799	0.239073	-0.200978	0.252677		0.302697	0.255744	0.015984		-0.303258	0.127771	-0.103856	0.365862	-0.278049	0.27904		0.020979	0.138861	0.283716		-0.23759	0.0508045	-0.142169	0.0934339	-0.0876695	0.225453
-3.93305			0.632368			-0.131892	0.266935	-0.202218	0.234689		0.105894	0.762238	0.040959		-0.311574	0.127397	-0.121321	0.334323	-0.189651	0.327661		0.112887	0.126873	0.869131		-0.183839	0.0955625	-0.142018	0.0805559	-0.0934099	0.224691
-3.87029			0.527473			-0.128813	0.269004	-0.221558	0.240321		0.12987	0.945055	0.10989		-0.315471	0.179702	-0.127969	0.300673	-0.133297	0.333454		0.555445	0.175824	0.463536		-0.142614	0.139589	-0.144546	0.0743125	-0.112412	0.212492
-3.80753			0.66034			-0.159494	0.232723	-0.224935	0.243585		0.312687	0.872128	0.355644		-0.297727	0.241278	-0.147459	0.305458	-0.160136	0.359605		0.876124	0.196803	0.24975		-0.108897	0.160058	-0.152497	0.0694946	-0.115005	0.187921
-3.74477			0.99001			-0.168023	0.203063	-0.241737	0.243311		0.585415	0.799201	0.755245		-0.238997	0.299668	-0.181789	0.308961	-0.187461	0.374153		0.807193	0.160839	0.267732		-0.133388	0.161517	-0.165851	0.0642724	-0.1226	0.183837
-3.68201			0.846154			-0.160752	0.174065	-0.220419	0.244588		0.701299	0.599401	0.903097		-0.194723	0.342146	-0.176227	0.299949	-0.164435	0.404695		0.639361	0.156843	0.334665		-0.149507	0.14923	-0.170552	0.0651287	-0.114989	0.179564
-3.61925			0.924076			-0.163698	0.191505	-0.224413	0.257651		0.702298	0.456543	0.718282		-0.16919	0.333225	-0.195726	0.287736	-0.125282	0.383961		0.744256	0.251748	0.376623		-0.152389	0.140417	-0.162796	0.0612853	-0.127015	0.170518
-3.55649			0.862138			-0.168498	0.206602	-0.247098	0.277478		0.778222	0.581419	0.814186		-0.177788	0.314381	-0.183191	0.276916	-0.124757	0.331473		0.803197	0.593407	0.378621		-0.134104	0.165536	-0.145508	0.07555	-0.150601	0.15752
-3.49372			0.79021			-0.223902	0.201376	-0.26725	0.237846		0.976024	0.956044	0.928072		-0.221822	0.276343	-0.175868	0.283413	-0.19926	0.278866		0.380619	0.863137	0.396603		-0.100821	0.189822	-0.110071	0.0941216	-0.174802	0.147501
-3.43096			0.938062			-0.267969	0.146178	-0.310739	0.197211		0.844156	0.584416	0.78022		-0.28042	0.228152	-0.202309	0.270483	-0.295335	0.249715		0.20979	0.521479	0.460539		-0.0907779	0.212631	-0.0926966	0.11603	-0.196914	0.13413
-3.3682			0.759241			-0.300625	0.105433	-0.297911	0.152258		0.753247	0.694306	0.931069		-0.267291	0.223729	-0.220161	0.236498	-0.321193	0.235536		0.208791	0.42957	0.563437		-0.124508	0.212836	-0.0977443	0.132214	-0.194999	0.132088
-3.30544			0.583417			-0.299504	0.0862545	-0.269311	0.177534		0.712288	0.91009	0.596404		-0.198215	0.274709	-0.240554	0.249009	-0.278885	0.301594		0.265734	0.421578	0.703297		-0.127502	0.188491	-0.111361	0.118818	-0.199504	0.111722
-3.24268			0.671329			-0.244733	0.135501	-0.253103	0.204799		0.631369	0.631369	0.274725		-0.105702	0.33237	-0.237495	0.254781	-0.256001	0.35486		0.30969	0.360639	0.811189		-0.12914	0.165523	-0.108923	0.107118	-0.214359	0.0998494
-3.17992			0.888112			-0.182979	0.19406	-0.242713	0.24169		0.514486	0.729271	0.257742		-0.113752	0.374465	-0.227481	0.277472	-0.252114	0.363475		0.30969	0.287712	0.952048		-0.136329	0.161209	-0.105997	0.109231	-0.22148	0.102356
-3.11715			0.996004			-0.162008	0.208168	-0.229186	0.262026		0.495504	0.928072	0.538462		-0.137006	0.331896	-0.206599	0.305079	-0.240902	0.293517		0.351648	0.314685	0.997003		-0.137907	0.186234	-0.0984405	0.123132	-0.211681	0.105647
-3.05439			0.878122			-0.175641	0.187898	-0.211773	0.261886		0.686314	0.691309	0.975025		-0.202192	0.249372	-0.218868	0.294608	-0.255962	0.227487		0.491508	0.582418	0.811189		-0.127121	0.189513	-0.0869459	0.128765	-0.188863	0.139832
-2.99163			0.654346			-0.199981	0.150282	-0.239333	0.275036		0.956044	0.91009	0.878122		-0.246055	0.195276	-0.25492	0.241725	-0.260111	0.214609		0.608392	0.861139	0.453546		-0.11753	0.199389	-0.110697	0.112743	-0.160197	0.175696
-2.92887			0.538462			-0.208615	0.170556	-0.240289	0.306448		0.839161	0.603397	0.71029		-0.264775	0.203151	-0.329961	0.182719	-0.277791	0.231946		0.681319	0.424575	0.200799		-0.119509	0.192977	-0.149708	0.0793154	-0.140375	0.175362
-2.86611			0.599401			-0.197219	0.193356	-0.194233	0.298504		0.935065	0.303696	0.182817		-0.240838	0.211299	-0.374211	0.126638	-0.307312	0.260483		0.638362	0.310689	0.127872		-0.129511	0.187826	-0.179987	0.045824	-0.156113	0.15912
-2.80335			0.834166			-0.168733	0.213191	-0.182225	0.271336		0.694306	0.21978	0.0679321		-0.224854	0.257512	-0.393297	0.0651519	-0.314206	0.265989		0.547453	0.467532	0.170829		-0.125507	0.17773	-0.182218	0.0501008	-0.166216	0.147577
-2.74059			0.959041			-0.173822	0.217846	-0.198038	0.239513		0.81019	0.232767	0.10989		-0.237293	0.236294	-0.40174	0.0522272	-0.30513	0.244292		0.471528	0.816184	0.30969		-0.12732	0.171526	-0.164801	0.0801166	-0.169231	0.141101
-2.67782			0.843157			-0.185647	0.212627	-0.231207	0.200647		0.667333	0.168831	0.30969		-0.299717	0.203601	-0.393707	0.0725323	-0.261248	0.268032		0.410589	0.865135	0.404595		-0.120176	0.179678	-0.132843	0.105796	-0.184125	0.142369
-2.61506			0.753247			-0.185857	0.225708	-0.23659	0.199401		0.252747	0.0609391	0.351648		-0.327039	0.187197	-0.44072	0.0521738	-0.231512	0.323327		0.354645	0.693307	0.440559		-0.12152	0.187169	-0.123111	0.114741	-0.196974	0.135387
-2.5523			0.68032			-0.175619	0.245515	-0.223961	0.230742		0.248751	0.012987	0.162837		-0.308584	0.194763	-0.482731	0.00206644	-0.232204	0.349824		0.388611	0.662338	0.532468		-0.133528	0.188974	-0.126604	0.111262	-0.205335	0.132876
-2.48954			0.708292			-0.169324	0.263434	-0.219648	0.247039		0.544456	0.015984	0.043956		-0.276895	0.215586	-0.502735	-0.0275557	-0.244624	0.330567		0.632368	0.642358	0.909091		-0.147631	0.179669	-0.136439	0.112487	-0.211948	0.135528
-2.42678			0.817183			-0.201901	0.257065	-0.237712	0.253198		0.941059	0.0519481	0.02997		-0.2804	0.259571	-0.485494	0.0293368	-0.309928	0.269041		0.858142	0.723277	0.535465		-0.177635	0.140816	-0.115291	0.140098	-0.206445	0.174965
-2.36402			0.994006			-0.236408	0.243621	-0.251566	0.262908		0.77023	0.182817	0.102897		-0.296252	0.251866	-0.474943	0.0813101	-0.330848	0.223695		0.501499	0.813187	0.237762		-0.197042	0.137644	-0.0940892	0.159886	-0.181626	0.203905
-2.30126			0.904096			-0.253984	0.237121	-0.258744	0.27809		0.994006	0.238761	0.224775		-0.339471	0.237152	-0.460802	0.0831336	-0.328397	0.200731		0.51049	0.827173	0.282717		-0.184463	0.145552	-0.0745727	0.178619	-0.177438	0.232878
-2.23849			0.957043			-0.231836	0.272223	-0.245989	0.305492		0.706294	0.134865	0.257742		-0.375955	0.192975	-0.492879	0.0233484	-0.357262	0.239149		0.904096	0.707293	0.594406		-0.153869	0.167322	-0.0834303	0.172023	-0.197274	0.219346
-2.17573			0.628372			-0.208709	0.325839	-0.28033	0.325113		0.692308	0.0619381	0.115884		-0.376035	0.207403	-0.562456	0.00227796	-0.390354	0.293079		0.62038	0.513487	0.916084		-0.153658	0.189804	-0.108349	0.161611	-0.231291	0.188764
-2.11297			0.463536			-0.172538	0.349913	-0.311866	0.323822		0.94006	0.0529471	0.032967		-0.353237	0.276326	-0.596279	-0.00181032	-0.392265	0.296765		0.462537	0.348651	0.976024		-0.170328	0.212354	-0.111507	0.149907	-0.252771	0.167545
-2.05021			0.574426			-0.21418	0.387986	-0.337018	0.373053		0.625375	0.0829171	0.017982		-0.267982	0.344536	-0.638191	0.023746	-0.411788	0.329446		0.606394	0.401598	0.856144		-0.187592	0.21667	-0.116288	0.160546	-0.243107	0.189299
-1.98745			0.926074			-0.278443	0.37213	-0.296968	0.397759		0.611389	0.114885	0.026973		-0.253872	0.39196	-0.607885	0.0824121	-0.399693	0.363847		0.936064	0.698302	0.773227		-0.194561	0.210281	-0.117049	0.176866	-0.24842	0.233499
-1.92469			0.608392			-0.283406	0.367504	-0.221939	0.443642		0.89011	0.132867	0.0679321		-0.298303	0.390969	-0.556447	0.134797	-0.37799	0.382236		0.861139	0.93007	0.885115		-0.212535	0.212257	-0.136814	0.174967	-0.235618	0.263341
-1.86192			0.344655			-0.324947	0.348463	-0.185259	0.503454		0.687313	0.130869	0.216783		-0.344328	0.30229	-0.547695	0.171484	-0.370459	0.400267		0.867133	0.812188	0.97003		-0.209807	0.204718	-0.162892	0.17488	-0.240221	0.269733
-1.79916			0.260739			-0.329565	0.32081	-0.199673	0.541314		0.505495	0.155844	0.354645		-0.382767	0.260589	-0.560832	0.114183	-0.400525	0.429606		0.933067	0.993007	0.926074		-0.231733	0.196637	-0.175026	0.172755	-0.253137	0.255143
-1.7364			0.300699			-0.356454	0.286581	-0.267302	0.563941		0.56044	0.166833	0.363636		-0.39418	0.272693	-0.594631	0.132179	-0.400493	0.408256		0.899101	0.705295	0.598402		-0.279841	0.192228	-0.168452	0.193864	-0.29093	0.240966
-1.67364			0.348651			-0.393833	0.286241	-0.337573	0.549289		0.762238	0.193806	0.260739		-0.417115	0.326851	-0.64461	0.135259	-0.415421	0.401278		0.753247	0.57043	0.334665		-0.328052	0.170782	-0.158918	0.216973	-0.319088	0.265991
-1.61088			0.421578			-0.40282	0.290687	-0.368284	0.509646		0.995005	0.207792	0.16983		-0.425751	0.36371	-0.687312	0.119791	-0.418728	0.423829		0.59041	0.695305	0.2997		-0.347694	0.171355	-0.160869	0.209095	-0.307246	0.291679
-1.54812			0.554446			-0.374653	0.316857	-0.360078	0.522111		0.905095	0.182817	0.118881		-0.414219	0.375909	-0.672475	0.0814609	-0.461061	0.419069		0.63037	0.939061	0.527473		-0.324686	0.195187	-0.184312	0.205306	-0.291222	0.313999
-1.48536			0.783217			-0.317078	0.370138	-0.354953	0.542744		0.847153	0.152847	0.0989011		-0.428542	0.463447	-0.667653	0.0387136	-0.477177	0.407329		0.824176	0.882118	0.929071		-0.268844	0.238407	-0.196638	0.180896	-0.279562	0.312214
-1.42259			0.953047			-0.284886	0.440882	-0.356102	0.530763		0.775225	0.145854	0.0859141		-0.422171	0.49131	-0.685036	0.0191735	-0.505343	0.41749		0.982018	0.908092	0.875125		-0.257507	0.261062	-0.203328	0.181654	-0.28206	0.288969
-1.35983			0.956044			-0.289578	0.447048	-0.389916	0.548072		0.648352	0.186813	0.0689311		-0.40695	0.521652	-0.734338	0.0554606	-0.551204	0.409904		0.955045	0.903097	0.962038		-0.25294	0.267785	-0.186637	0.219194	-0.306358	0.293151
-1.29707			0.795205			-0.35295	0.405725	-0.372743	0.582767		0.426573	0.300699	0.0639361		-0.355439	0.555566	-0.720876	0.0630431	-0.636606	0.411542		0.817183	0.86014	0.636364		-0.271638	0.231399	-0.177515	0.26626	-0.288325	0.296704
-1.23431			0.641359			-0.409181	0.371561	-0.38028	0.60252		0.243756	0.597403	0.0629371		-0.340503	0.584948	-0.719498	0.0854447	-0.743418	0.408252		0.535465	0.96004	0.527473		-0.28116	0.217822	-0.192329	0.263522	-0.282326	0.33735
-1.17155			0.552448			-0.414234	0.363852	-0.351225	0.568147		0.114885	0.931069	0.0629371		-0.308922	0.646634	-0.736361	0.150568	-0.803007	0.357898		0.441558	0.61039	0.742258		-0.273303	0.233411	-0.220901	0.242377	-0.25302	0.365916
-1.10879			0.571429			-0.41622	0.362577	-0.337899	0.522117		0.0589411	0.851149	0.04995		-0.268918	0.727885	-0.732874	0.211171	-0.838999	0.306231		0.503497	0.372627	0.863137		-0.271084	0.260776	-0.250339	0.198733	-0.252824	0.398095
-1.04603			0.616384			-0.411941	0.362125	-0.361058	0.520199		0.045954	0.828172	0.040959		-0.206512	0.826707	-0.704053	0.284047	-0.798948	0.340036		0.701299	0.375624	0.606394		-0.255029	0.297296	-0.261844	0.193602	-0.267839	0.378662
-0.983264			0.562438			-0.432236	0.360596	-0.361089	0.548184		0.0559441	0.885115	0.041958		-0.155249	0.96513	-0.655575	0.34895	-0.76467	0.421602		0.927073	0.621379	0.651349		-0.263214	0.309558	-0.265586	0.20854	-0.315037	0.362362
-0.920502			0.515485			-0.462393	0.328134	-0.362022	0.557244		0.0639361	0.816184	0.0709291		-0.140837	1.01809	-0.592637	0.43466	-0.737664	0.451603		0.965035	0.952048	0.9001		-0.283144	0.28894	-0.249324	0.226524	-0.371018	0.352556
-0.857741			0.561439			-0.460337	0.344283	-0.386503	0.52388		0.0589411	0.556444	0.181818		-0.178334	1.04117	-0.565417	0.536977	-0.795059	0.415975		0.944056	0.844156	0.88012		-0.328796	0.290165	-0.222214	0.243893	-0.379201	0.343738
-0.794979			0.842158			-0.421546	0.399375	-0.434774	0.540952		0.040959	0.261738	0.371628		-0.261267	0.969406	-0.530443	0.677836	-0.854905	0.289686		0.933067	0.852148	0.91009		-0.306594	0.341056	-0.209587	0.24603	-0.349732	0.354994
-0.732218			0.707293			-0.3722	0.479806	-0.53034	0.483716		0.028971	0.128871	0.56044		-0.33609	0.974896	-0.532106	0.763857	-0.974046	0.169505		0.79021	0.901099	0.868132		-0.280835	0.36831	-0.204562	0.258166	-0.339798	0.352409
-0.669456			0.327672			-0.267826	0.625277	-0.581746	0.478321		0.016983	0.0859141	0.597403		-0.31949	1.03457	-0.555838	0.824975	-0.957597	0.148253		0.62038	0.897103	0.638362		-0.238159	0.413305	-0.198788	0.259014	-0.330486	0.351911
-0.606695			0.204795			-0.194601	0.765976	-0.576405	0.535379		0.011988	0.113886	0.474525		-0.246442	1.11259	-0.530734	0.880796	-0.899043	0.154011		0.467532	0.794206	0.554446		-0.228563	0.423531	-0.187614	0.261815	-0.332425	0.325436
-0.543933			0.226773			-0.171232	0.800037	-0.532151	0.629411		0.013986	0.157842	0.346653		-0.182183	1.20076	-0.485961	0.912161	-0.805127	0.255634		0.415584	0.729271	0.564436		-0.207266	0.395176	-0.20549	0.248975	-0.358864	0.330336
-0.481172			0.383616			-0.182585	0.754218	-0.447646	0.699701		0.016983	0.201798	0.301698		-0.159367	1.26593	-0.457795	0.97915	-0.758337	0.330607		0.464535	0.816184	0.54046		-0.213796	0.371827	-0.249463	0.240126	-0.395	0.32079
-0.41841			0.633367			-0.230361	0.725143	-0.394935	0.749099		0.020979	0.181818	0.321678		-0.154327	1.37833	-0.429402	1.00499	-0.768226	0.368629		0.52048	0.949051	0.402597		-0.229248	0.375568	-0.281917	0.207656	-0.40883	0.339692
-0.355649			0.869131			-0.268077	0.724214	-0.370147	0.797867		0.023976	0.125874	0.41958		-0.238329	1.3814	-0.3569	1.06459	-0.768851	0.38135		0.473526	0.796204	0.280719		-0.212487	0.382433	-0.291602	0.199309	-0.378279	0.358962
-0.292887			0.886114			-0.273929	0.787132	-0.371573	0.850316		0.02997	0.0749251	0.572428		-0.24894	1.3655	-0.298906	1.15006	-0.736371	0.341365		0.365634	0.931069	0.240759		-0.185372	0.426176	-0.268653	0.214728	-0.381585	0.337036
-0.230126			0.738262			-0.211434	0.859157	-0.385154	0.855024		0.031968	0.04995	0.746254		-0.242098	1.25131	-0.268053	1.20761	-0.756216	0.353764		0.247752	0.618382	0.381618		-0.184476	0.444804	-0.222817	0.257836	-0.383673	0.291823
-0.167364			0.584416			-0.176729	0.870676	-0.371771	0.861036		0.021978	0.034965	0.874126		-0.204964	1.22325	-0.275235	1.30199	-0.856401	0.313404		0.177822	0.228771	0.772228		-0.193164	0.436602	-0.163057	0.309892	-0.422521	0.25073
-0.104603			0.545455			-0.159328	0.888956	-0.321673	0.824714		0.016983	0.030969	0.924076		-0.172289	1.24526	-0.275432	1.36693	-0.91019	0.326154		0.184815	0.0949051	0.837163		-0.22668	0.395551	-0.130483	0.354818	-0.442551	0.226852
-0.041841			0.622378			-0.151919	0.912167	-0.287188	0.833649		0.013986	0.028971	0.918082		-0.178772	1.3001	-0.256962	1.4582	-0.909276	0.373009		0.190809	0.0689311	0.711289		-0.222281	0.38728	-0.112377	0.359254	-0.459382	0.241378
0.0209205			0.691309			-0.117212	1.00242	-0.230456	0.926339		0.015984	0.034965	0.916084		-0.110199	1.39917	-0.177236	1.51014	-0.831623	0.437626		0.170829	0.0989011	0.849151		-0.176777	0.410205	-0.103146	0.363849	-0.435568	0.288835
0.083682			0.72028			-0.0261398	1.15105	-0.110924	1.09696		0.024975	0.027972	0.969031		-0.0271627	1.47672	-0.0822871	1.55888	-0.767096	0.524281		0.140859	0.12987	0.907093		-0.125718	0.476345	-0.0583589	0.399485	-0.392531	0.343838
0.146444			0.701299			0.144029	1.35685	-0.00024562	1.30028		0.032967	0.015984	0.869131		0.0193941	1.5304	0.0516948	1.66273	-0.659632	0.643837		0.136863	0.154845	0.82018		-0.0505994	0.574879	-0.00500279	0.468438	-0.320917	0.447513
0.209205			0.681319			0.294631	1.56228	0.177699	1.49934		0.03996	0.00899101	0.66034		0.102632	1.61737	0.220913	1.75721	-0.602786	0.736083		0.202797	0.186813	0.925075		0.0462345	0.671087	0.0948726	0.582183	-0.236559	0.579018
0.271967			0.74026			0.434079	1.72086	0.318435	1.69774		0.044955	0.003996	0.486513		0.158343	1.65215	0.355034	1.8685	-0.49159	0.83224		0.364635	0.286713	0.976024		0.11267	0.777996	0.189506	0.674109	-0.115173	0.690546
0.334728			0.742258			0.570148	1.85075	0.44703	1.8386		0.0599401	0.002997	0.414585		0.211502	1.63063	0.461252	1.93953	-0.389444	0.929688		0.524476	0.56044	0.883117		0.184203	0.902951	0.244694	0.747743	0.0171866	0.78686
0.39749			0.592408			0.698203	1.93857	0.45884	1.89137		0.0749251	0.003996	0.407592		0.228216	1.66419	0.503838	2.03793	-0.340336	0.969724		0.471528	0.879121	0.431568		0.273528	0.977624	0.260844	0.768935	0.108565	0.858057
0.460251			0.340659			0.80382	2.10164	0.465568	1.89755		0.0579421	0.003996	0.43956		0.226123	1.74873	0.489185	2.01891	-0.325307	0.930378		0.174825	0.962038	0.0909091		0.376226	1.12169	0.269876	0.768684	0.142002	0.891558
0.523013			0.133866			0.907309	2.22519	0.449148	1.80106		0.026973	0.002997	0.522478		0.237679	1.77198	0.420841	2.06482	-0.42256	0.840438		0.024975	0.663337	0.017982		0.488144	1.25762	0.2878	0.784756	0.0808373	0.839477
0.585774			0.045954			0.950814	2.2726	0.404414	1.69971		0.004995	0.003996	0.657343		0.244493	1.78521	0.3638	2.05877	-0.509388	0.759686		0.000999001	0.300699	0.004995		0.569522	1.35952	0.295037	0.825129	0.039161	0.765494
0.648536			0.027972			0.938975	2.34684	0.336791	1.63441		0.001998	0.003996	0.84016		0.304695	1.86533	0.309613	2.0447	-0.56613	0.720209		0.000999001	0.166833	0.00599401		0.60922	1.40895	0.30803	0.8409	-0.028313	0.735873
0.711297			0.017982			0.964813	2.37713	0.352838	1.58684		0.001998	0.003996	0.962038		0.400475	1.94251	0.295675	2.06452	-0.565711	0.700587		0.000999001	0.157842	0.003996		0.60637	1.39937	0.308507	0.83797	-0.0636182	0.722542
0.774059			0.022977			0.97292	2.36439	0.389171	1.60831		0.002997	0.004995	0.985015		0.447773	2.00553	0.292597	2.13544	-0.463164	0.785981		0.000999001	0.217782	0.003996		0.596535	1.41429	0.258863	0.797959	-0.0792362	0.729232
0.83682			0.026973			0.971115	2.32139	0.388144	1.59414		0.00599401	0.018981	0.995005		0.420904	1.99333	0.262499	2.14664	-0.352378	0.946179		0.000999001	0.285714	0.000999001		0.592554	1.43546	0.215428	0.750014	-0.0981331	0.730053
0.899582			0.036963			0.921804	2.25506	0.326742	1.60823		0.016983	0.024975	0.997003		0.398234	1.93252	0.227952	2.12052	-0.284853	0.993659		0.000999001	0.251748	0.000999001		0.608857	1.44012	0.205545	0.746429	-0.128237	0.740386
0.962343			0.0519481			0.853331	2.19072	0.28763	1.55799		0.014985	0.025974	0.944056		0.396083	1.94047	0.254622	2.06139	-0.299213	0.975456		0.000999001	0.134865	0.000999001		0.615981	1.45231	0.229776	0.759603	-0.15168	0.725386
1.0251			0.0809191			0.823335	2.11788	0.317086	1.55715		0.004995	0.016983	0.883117		0.402302	1.92343	0.212381	2.02519	-0.378251	0.932497		0.000999001	0.0909091	0.004995		0.614379	1.41059	0.246961	0.782274	-0.12273	0.70389
1.08787			0.104895			0.790182	2.12749	0.370153	1.55338		0.004995	0.014985	0.845155		0.406733	1.92541	0.25117	2.01657	-0.460074	0.842556		0.000999001	0.105894	0.004995		0.579156	1.36695	0.242814	0.784019	-0.114465	0.729932
1.15063			0.111888			0.775306	2.11743	0.362782	1.54229		0.00699301	0.00999001	0.9001		0.406188	1.88399	0.303516	2.00598	-0.482195	0.804838		0.000999001	0.237762	0.00599401		0.51826	1.35897	0.207248	0.775356	-0.101181	0.748974
1.21339			0.136863			0.737283	2.09819	0.360695	1.5128		0.010989	0.014985	0.991009		0.371594	1.8424	0.261288	2.00024	-0.485788	0.857557		0.001998	0.446553	0.003996		0.520217	1.34186	0.172283	0.729809	-0.0902946	0.786085
1.27615			0.187812			0.682978	2.01475	0.311143	1.48599		0.035964	0.027972	0.918082		0.300211	1.79072	0.185618	1.95825	-0.446192	0.955779		0.002997	0.585415	0.001998		0.53809	1.34899	0.156085	0.71826	-0.0935678	0.812403
1.33891			0.248751			0.62072	1.96646	0.299132	1.48664		0.0709291	0.0789211	0.93007		0.247692	1.74236	0.129291	1.92133	-0.360428	1.01888		0.003996	0.628372	0.001998		0.573527	1.35506	0.155843	0.708076	-0.0788151	0.828618
1.40167			0.306693			0.566718	1.90037	0.301256	1.51371		0.0799201	0.0959041	0.942058		0.228186	1.71939	0.104375	1.89025	-0.33604	0.993596		0.003996	0.651349	0.001998		0.56906	1.34381	0.164825	0.709871	-0.0894849	0.843259
1.46444			0.317682			0.563269	1.90568	0.312999	1.56163		0.0559441	0.0659341	0.903097		0.22639	1.73431	0.135905	1.91796	-0.373974	0.976101		0.003996	0.744256	0.000999001		0.560927	1.32377	0.145001	0.678012	-0.0812801	0.846631
1.5272			0.305694			0.523538	1.91558	0.292956	1.5682		0.034965	0.025974	0.828172		0.243715	1.78004	0.162429	1.98753	-0.477966	0.946074		0.00899101	0.862138	0.001998		0.516902	1.28105	0.111813	0.669539	-0.0739178	0.861664
1.58996			0.335664			0.47405	1.85193	0.272686	1.50336		0.023976	0.023976	0.842158		0.275476	1.79905	0.168536	2.01642	-0.521702	0.980533		0.01998	0.88012	0.003996		0.49792	1.23934	0.113059	0.683026	-0.0705991	0.883567
1.65272			0.491508			0.39232	1.74365	0.254263	1.46495		0.037962	0.044955	0.974026		0.296533	1.87541	0.17906	1.979	-0.511363	1.06858		0.020979	0.787213	0.00999001		0.46398	1.2173	0.149058	0.704636	-0.0677731	0.892101
1.71548			0.656344			0.284767	1.65813	0.246935	1.42462		0.0669331	0.13986	0.853147		0.35397	1.93276	0.120643	1.95836	-0.396997	1.20534		0.027972	0.631369	0.015984		0.451495	1.22723	0.174061	0.733778	-0.0784526	0.862661
1.77824			0.67033			0.249173	1.57751	0.215885	1.35628		0.116883	0.225774	0.772228		0.345266	1.89516	0.0816903	1.93371	-0.354147	1.26852		0.030969	0.592408	0.025974		0.437332	1.22144	0.177607	0.738052	-0.0954964	0.880809
1.841			0.545455			0.225892	1.63072	0.160602	1.35301		0.114885	0.197802	0.868132		0.314686	1.87287	0.0844871	1.90604	-0.346507	1.19986		0.037962	0.658342	0.023976		0.414731	1.18671	0.154529	0.731274	-0.0932752	0.886214
1.90377			0.41958			0.275995	1.69629	0.0886824	1.28743		0.0719281	0.0859141	0.944056		0.285197	1.83488	0.155815	1.97475	-0.386104	1.11189		0.038961	0.734266	0.018981		0.400318	1.15697	0.129838	0.70735	-0.0936455	0.870436
1.96653			0.38961			0.235832	1.71454	0.0511194	1.27427		0.035964	0.040959	0.792208		0.209449	1.79069	0.181898	2.09866	-0.475084	0.992513		0.036963	0.687313	0.020979		0.400674	1.13972	0.128025	0.69058	-0.108035	0.858698
2.02929			0.436563			0.184056	1.70307	0.0353999	1.29308		0.034965	0.035964	0.777223		0.147877	1.71486	0.113818	2.13108	-0.497591	0.943481		0.028971	0.533467	0.028971		0.409911	1.12213	0.152127	0.718185	-0.124588	0.839378
2.09205			0.483516			0.205858	1.65914	0.055128	1.29783		0.0599401	0.0659341	0.77023		0.146075	1.64594	0.0372345	2.07179	-0.462768	0.905708		0.025974	0.40959	0.0639361		0.398341	1.08759	0.187804	0.745191	-0.127087	0.817239
2.15481			0.432567			0.277474	1.64064	0.0754039	1.27324		0.120879	0.117882	0.758242		0.0882741	1.50742	0.00802938	1.97526	-0.416696	0.929598		0.026973	0.334665	0.116883		0.366116	1.08813	0.193095	0.771338	-0.156773	0.817764
2.21757			0.291708			0.347258	1.65454	0.0494252	1.20323		0.184815	0.144855	0.705295		0.0158641	1.41363	-0.0058285	1.85095	-0.423913	0.984959		0.03996	0.35964	0.148851		0.332586	1.09009	0.187108	0.764464	-0.146174	0.812408
2.28033			0.168831			0.405457	1.72068	0.00911003	1.18499		0.171828	0.142857	0.74026		0.0138633	1.40391	0.0028919	1.74432	-0.446141	1.0016		0.0549451	0.444555	0.152847		0.296975	1.10232	0.165459	0.750353	-0.132408	0.855268
2.3431			0.107892			0.477334	1.75773	-0.00377561	1.17305		0.0929071	0.125874	0.928072		0.129463	1.50568	-0.0224115	1.70313	-0.488178	0.994431		0.0799201	0.535465	0.141858		0.290853	1.13943	0.158831	0.746605	-0.113255	0.893606
2.40586			0.0739261			0.499727	1.77062	0.00999255	1.19744		0.046953	0.122877	0.802198		0.196038	1.61177	-0.0715147	1.66118	-0.499671	1.01193		0.107892	0.624376	0.150849		0.311149	1.1422	0.154985	0.752242	-0.0937913	0.928927
2.46862			0.042957			0.526698	1.83494	-0.00128831	1.19006		0.030969	0.12987	0.605395		0.290438	1.73667	-0.106592	1.69357	-0.472903	0.993519		0.130869	0.716284	0.16983		0.323627	1.14412	0.158034	0.766334	-0.088548	0.926052
2.53138			0.016983			0.592846	1.94458	-0.0744846	1.1658		0.023976	0.116883	0.532468		0.31918	1.79866	-0.0231347	1.76274	-0.475473	0.98459		0.152847	0.775225	0.171828		0.329182	1.13837	0.143083	0.767459	-0.0844761	0.946881
2.59414			0.004995			0.698469	2.06905	-0.134705	1.14192		0.013986	0.0769231	0.4995		0.397104	1.92734	0.0720448	1.81825	-0.484153	0.98185		0.137862	0.823177	0.117882		0.338082	1.15546	0.138974	0.7678	-0.0688908	0.953316
2.6569			0.001998			0.765081	2.19071	-0.17483	1.00954		0.00599401	0.0599401	0.407592		0.483878	2.09669	0.135228	1.84529	-0.494322	1.00941		0.103896	0.898102	0.0549451		0.346289	1.19138	0.134598	0.736705	-0.0608738	0.982156
2.71967			0.001998			0.820476	2.29905	-0.170809	1.00067		0.004995	0.0549451	0.292707		0.519838	2.33123	0.130213	1.81895	-0.47813	0.977181		0.0649351	0.978022	0.014985		0.387514	1.25943	0.120522	0.70357	-0.0426812	1.02755
2.78243			0.002997			0.885693	2.43807	-0.121803	1.06237		0.00599401	0.0779221	0.196803		0.554029	2.44223	0.119789	1.76423	-0.458313	0.974621		0.04995	0.78022	0.003996		0.450375	1.31956	0.105042	0.682028	-0.00859596	1.06586
2.84519			0.004995			0.955569	2.53774	-0.0266378	1.2118		0.004995	0.127872	0.115884		0.590719	2.509	0.0828715	1.68847	-0.424531	1.00665		0.043956	0.585415	0.000999001		0.513258	1.34886	0.0903683	0.666229	0.0128505	1.08988
2.90795			0.00599401			0.991452	2.52516	0.0521476	1.32625		0.00699301	0.180819	0.0679321		0.634948	2.5493	0.0476566	1.63383	-0.418679	1.07211		0.041958	0.46953	0.000999001		0.552576	1.36679	0.0749888	0.654832	0.0301651	1.09924
2.97071			0.004995			0.995952	2.52405	0.0886516	1.32821		0.003996	0.247752	0.034965		0.706524	2.64112	0.0168733	1.57278	-0.405322	1.12731		0.02997	0.410589	0.000999001		0.583179	1.4141	0.0738683	0.638897	0.0186758	1.10099
3.03347			0.003996			0.977425	2.53622	0.07882	1.30728		0.002997	0.374625	0.013986		0.786368	2.70943	-0.0259059	1.51994	-0.407042	1.16472		0.021978	0.360639	0.000999001		0.606956	1.49025	0.0593582	0.614455	0.000595173	1.10978
3.09623			0.001998			0.950571	2.4893	0.0231274	1.1754		0.002997	0.534466	0.00599401		0.856812	2.7638	-0.0848886	1.50363	-0.359789	1.21614		0.011988	0.265734	0.000999001		0.61943	1.61061	0.0265693	0.576747	-0.00713453	1.12958
3.159			0.001998			0.944052	2.48388	-0.0315134	1.06244		0.001998	0.679321	0.004995		0.819164	2.71309	-0.140047	1.48098	-0.296887	1.29766		0.00999001	0.164835	0.000999001		0.66196	1.67223	-0.0058322	0.550355	0.00901129	1.15257
3.22176			0.001998			0.946251	2.45152	-0.114691	1.01169		0.002997	0.729271	0.00799201		0.725832	2.59783	-0.170484	1.54568	-0.281397	1.28121		0.010989	0.125874	0.000999001		0.677337	1.66653	-0.00417684	0.564623	0.0552354	1.17579
3.28452			0.001998			0.929929	2.41111	-0.130066	1.03668		0.00899101	0.742258	0.021978		0.639451	2.52423	-0.173306	1.58856	-0.27995	1.28679		0.014985	0.135864	0.000999001		0.663755	1.62915	0.00865279	0.58545	0.0807976	1.1776
3.34728			0.001998			0.886874	2.40494	-0.0889742	1.10686		0.016983	0.806194	0.030969		0.647971	2.49755	-0.170785	1.58252	-0.253812	1.27794		0.022977	0.207792	0.000999001		0.624217	1.57245	0.0449856	0.617285	0.057776	1.17718
3.41004			0.002997			0.828969	2.36136	-0.0633665	1.15681		0.023976	0.967033	0.023976		0.625268	2.43256	-0.220419	1.50142	-0.265476	1.38343		0.027972	0.333666	0.000999001		0.574099	1.52619	0.0568286	0.65946	0.00343367	1.17052
3.4728			0.001998			0.784086	2.29031	-0.086076	1.16169		0.037962	0.833167	0.024975		0.575205	2.33342	-0.303794	1.46484	-0.267043	1.37881		0.02997	0.398601	0.001998		0.564116	1.50301	0.054973	0.672575	-0.0475682	1.17736
3.53556			0.001998			0.805963	2.24003	-0.109438	1.09211		0.0579421	0.747253	0.032967		0.517252	2.19897	-0.387481	1.4446	-0.235308	1.35229		0.025974	0.398601	0.000999001		0.573482	1.51801	0.0457841	0.668081	-0.0492601	1.15031
3.59833			0.001998			0.849632	2.21106	-0.146238	1.04989		0.0689311	0.777223	0.043956		0.47972	2.09257	-0.351886	1.40404	-0.236307	1.39002		0.021978	0.37962	0.000999001		0.578736	1.50579	0.0498885	0.677024	-0.0172273	1.10146
3.66109			0.001998			0.8516	2.19053	-0.139997	1.05497		0.0589411	0.911089	0.048951		0.453858	2.0376	-0.306949	1.33892	-0.275135	1.29086		0.02997	0.438561	0.000999001		0.558597	1.4927	0.0586293	0.686762	-0.0143571	1.073
3.72385			0.001998			0.766724	2.18336	-0.138048	1.09684		0.037962	0.931069	0.045954		0.480307	2.06088	-0.261884	1.3116	-0.265388	1.2335		0.03996	0.519481	0.000999001		0.50997	1.45089	0.0621796	0.694039	-0.0340068	1.04983
3.78661			0.002997			0.651584	2.13338	-0.121041	1.16974		0.028971	0.823177	0.042957		0.508378	2.10852	-0.231012	1.29407	-0.292626	1.1708		0.0559441	0.57043	0.001998		0.460776	1.41389	0.0691213	0.678324	-0.0507722	1.03084
3.84937			0.00699301			0.56519	2.0423	-0.134329	1.23022		0.030969	0.769231	0.0609391		0.464821	2.04691	-0.236308	1.36061	-0.245745	1.16165		0.0629371	0.527473	0.001998		0.427207	1.38205	0.0475545	0.669236	-0.0573142	1.03129
3.91213			0.011988			0.525869	1.95942	-0.172753	1.27604		0.0539461	0.725275	0.110889		0.370465	1.91659	-0.194347	1.39478	-0.24012	1.17453		0.0559441	0.514486	0.002997		0.424452	1.38709	0.0387459	0.673158	-0.0502078	1.02797
3.9749			0.017982			0.514136	1.88429	-0.201758	1.30667		0.0779221	0.624376	0.197802		0.300448	1.85075	-0.197999	1.37146	-0.260517	1.1819		0.037962	0.644356	0.003996		0.438576	1.42125	0.0555407	0.701113	-0.0495423	1.03226
4.03766			0.02997			0.484395	1.81847	-0.18612	1.30679		0.0719281	0.493506	0.265734		0.28821	1.78535	-0.180146	1.36129	-0.327443	1.08336		0.027972	0.899101	0.00599401		0.437712	1.42663	0.0747099	0.754336	-0.0814683	0.995644
4.10042			0.0639361			0.417046	1.76092	-0.169041	1.2842		0.037962	0.335664	0.322677		0.283943	1.82455	-0.158751	1.411	-0.433087	1.03534		0.026973	0.92008	0.00699301		0.455007	1.39546	0.0780836	0.739273	-0.131627	0.956224
4.16318			0.10989			0.345684	1.71486	-0.138898	1.32536		0.030969	0.215784	0.435564		0.278077	1.85433	-0.113287	1.5108	-0.496129	1.00711		0.024975	0.924076	0.00699301		0.447227	1.36859	0.0520204	0.699389	-0.152882	0.926565
4.22594			0.166833			0.280517	1.68521	-0.141589	1.34052		0.027972	0.144855	0.636364		0.196598	1.74115	-0.0732434	1.61886	-0.536019	0.969637		0.034965	0.887113	0.00699301		0.42507	1.32113	-0.00566927	0.669802	-0.146518	0.944273
4.2887			0.255744			0.25586	1.62032	-0.164572	1.34352		0.034965	0.130869	0.829171		0.173133	1.65006	-0.00785301	1.70893	-0.504113	0.983736		0.0519481	0.688312	0.00599401		0.403442	1.26998	-0.0216345	0.649391	-0.104462	0.987402
4.35146			0.38961			0.211012	1.56197	-0.146146	1.41876		0.047952	0.161838	0.891109		0.181709	1.64047	0.019699	1.7845	-0.464092	1.01958		0.0899101	0.618382	0.004995		0.390636	1.24413	-0.01365	0.652978	-0.105399	1.04764
4.41423			0.547453			0.183147	1.4952	-0.106105	1.474		0.0799201	0.24975	0.807193		0.240566	1.59194	-0.0170624	1.77732	-0.395977	1.12193		0.108891	0.678322	0.012987		0.360189	1.19625	0.00350223	0.655574	-0.135589	1.04677
4.47699			0.688312			0.12126	1.43637	-0.0429192	1.40188		0.103896	0.348651	0.691309		0.273066	1.57872	-0.02335	1.72246	-0.337923	1.16537		0.117882	0.782218	0.017982		0.330061	1.15422	0.00747686	0.65573	-0.146766	1.03393
4.53975			0.731269			0.0613087	1.34551	-0.0366445	1.32845		0.141858	0.38961	0.718282		0.269096	1.58171	-0.0143358	1.71758	-0.310546	1.17207		0.103896	0.795205	0.015984		0.30465	1.14587	-0.00962733	0.634267	-0.155651	0.990915
4.60251			0.7003			0.0106253	1.27374	-0.121908	1.21084		0.164835	0.317682	0.869131		0.202214	1.56068	0.0141893	1.74309	-0.328675	1.1574		0.0729271	0.736264	0.011988		0.331024	1.12811	-0.0544392	0.630952	-0.159846	0.952054
4.66527			0.665335			-0.0219375	1.22949	-0.187689	1.14685		0.153846	0.23976	0.986014		0.165035	1.54068	0.0214366	1.69716	-0.359636	1.0876		0.0539461	0.685315	0.00799201		0.3495	1.12505	-0.0839316	0.604463	-0.167841	0.903146
4.72803			0.657343			-0.000746748	1.21499	-0.173852	1.16171		0.0959041	0.200799	0.971029		0.191325	1.52604	0.00900233	1.63159	-0.418527	1.01103		0.0579421	0.673327	0.004995		0.348104	1.12354	-0.0776693	0.591059	-0.144555	0.895387
4.79079			0.643357			0.0485516	1.29058	-0.121605	1.2478		0.0729271	0.233766	0.768232		0.224446	1.52318	-0.0427542	1.57002	-0.471188	0.995331		0.0829171	0.704296	0.010989		0.322876	1.10226	-0.0504935	0.615142	-0.123101	0.907328
4.85356			0.579421			0.126599	1.38209	-0.110327	1.28482		0.0819181	0.34965	0.586414		0.250711	1.54428	-0.0819911	1.5162	-0.435886	1.0559		0.133866	0.717283	0.01998		0.280729	1.10996	-0.0384239	0.636841	-0.115529	0.925897
4.91632			0.473526			0.179133	1.40585	-0.107549	1.25507		0.130869	0.547453	0.517483		0.223812	1.54236	-0.100295	1.52253	-0.337289	1.14677		0.141858	0.764236	0.024975		0.286353	1.12298	-0.0356757	0.664275	-0.113406	0.906764
4.97908			0.383616			0.160936	1.38565	-0.143918	1.17491		0.1998	0.714286	0.511489		0.198794	1.53175	-0.151392	1.55667	-0.290082	1.15918		0.110889	0.826174	0.024975		0.30006	1.13276	-0.0269733	0.67392	-0.135187	0.929761
5.04184			0.366633			0.121181	1.40876	-0.170443	1.13628		0.18981	0.774226	0.455544		0.154194	1.53876	-0.201545	1.54295	-0.310547	1.12893		0.0769231	0.864136	0.016983		0.324559	1.15772	-0.0243959	0.670488	-0.142017	0.899871
5.1046			0.440559			0.083374	1.39408	-0.182586	1.15778		0.100899	0.702298	0.324675		0.210506	1.57815	-0.290052	1.44674	-0.406655	1.05642		0.0719281	0.808192	0.00899101		0.324829	1.17851	-0.0308659	0.657605	-0.161588	0.892675
5.16736			0.56044			0.0849711	1.37656	-0.144511	1.22849		0.038961	0.592408	0.188811		0.26966	1.64503	-0.369997	1.38907	-0.526564	0.960936		0.0839161	0.653347	0.00699301		0.301927	1.20738	-0.0535226	0.620792	-0.141765	0.897698
5.23013			0.637363			0.0753385	1.36244	-0.134853	1.33002		0.013986	0.481518	0.125874		0.292043	1.70724	-0.371574	1.35392	-0.653629	0.903849		0.102897	0.458541	0.001998		0.299296	1.20323	-0.0848087	0.58199	-0.103241	0.895551
5.29289			0.612388			0.0356263	1.35667	-0.155189	1.32015		0.011988	0.464535	0.10989		0.322454	1.75465	-0.321685	1.37517	-0.626578	0.894124		0.121878	0.350649	0.003996		0.295061	1.21541	-0.0998231	0.559445	-0.091771	0.907332
5.35565			0.514486			0.00482504	1.30427	-0.224461	1.22006		0.020979	0.533467	0.108891		0.331806	1.76276	-0.299453	1.37127	-0.567607	0.95986		0.111888	0.34965	0.003996		0.286631	1.21288	-0.0948776	0.562588	-0.0869911	0.894427
5.41841			0.391608			0.00129662	1.27381	-0.264459	1.11242		0.02997	0.694306	0.0979021		0.32613	1.73923	-0.36103	1.32364	-0.463284	1.02353		0.0909091	0.414585	0.00599401		0.302455	1.20155	-0.102789	0.566407	-0.0996559	0.8834
5.48117			0.330669			0.0163034	1.31419	-0.2916	1.09175		0.031968	0.849151	0.0719281		0.326868	1.68587	-0.393477	1.23764	-0.456735	1.02485		0.0909091	0.456543	0.004995		0.278495	1.17484	-0.103128	0.566692	-0.140106	0.882664
5.54393			0.315684			0.0395439	1.28489	-0.296666	1.05466		0.01998	0.917083	0.046953		0.319801	1.651	-0.458721	1.16775	-0.469797	0.934274		0.126873	0.448551	0.00599401		0.241285	1.11681	-0.112077	0.537386	-0.169964	0.881433
5.60669			0.340659			0.00109453	1.23459	-0.317323	1.02027		0.014985	0.868132	0.048951		0.307874	1.6276	-0.468522	1.17518	-0.506334	0.884288		0.1998	0.453546	0.011988		0.192982	1.04765	-0.129088	0.546521	-0.180159	0.880323
5.66946			0.353646			-0.0356413	1.21308	-0.356648	0.986049		0.013986	0.694306	0.0699301		0.308101	1.60341	-0.390733	1.24485	-0.546066	0.866674		0.268731	0.514486	0.028971		0.155559	0.983766	-0.114377	0.5439	-0.181242	0.853718
5.73222			0.30969			-0.012767	1.24198	-0.407157	0.947939		0.012987	0.509491	0.115884		0.308905	1.66621	-0.310682	1.32846	-0.618484	0.874499		0.293706	0.64036	0.0529471		0.129417	0.963263	-0.0814169	0.579345	-0.146434	0.826608
5.79498			0.214785			0.0220273	1.2899	-0.427464	0.941898		0.013986	0.402597	0.153846		0.31357	1.71684	-0.267816	1.35051	-0.679642	0.88988		0.293706	0.714286	0.0839161		0.102471	0.958687	-0.0725551	0.57435	-0.143667	0.80446
5.85774			0.152847			0.0778492	1.37517	-0.406364	1.01871		0.00999001	0.404595	0.132867		0.297097	1.75906	-0.327478	1.34256	-0.682575	0.883219		0.281718	0.652348	0.0599401		0.122135	0.95676	-0.0700035	0.546921	-0.16561	0.791511
5.9205			0.130869			0.0977829	1.38385	-0.385539	1.04543		0.00899101	0.465534	0.0779221		0.310744	1.83986	-0.327839	1.28559	-0.678812	0.920215		0.267732	0.471528	0.026973		0.15321	0.959688	-0.108529	0.527824	-0.18714	0.802686
5.98326			0.175824			0.128827	1.37943	-0.344954	1.0663		0.004995	0.546454	0.023976		0.328007	1.97548	-0.351483	1.22126	-0.63464	0.984106		0.250749	0.345654	0.013986		0.171257	0.95755	-0.159099	0.467472	-0.18603	0.7958
6.04603			0.306693			0.0316222	1.29712	-0.33701	1.0633		0.002997	0.594406	0.011988		0.390738	2.08939	-0.309717	1.18537	-0.596133	1.06515		0.248751	0.326673	0.013986		0.152928	0.967982	-0.185956	0.443911	-0.180496	0.764801
6.10879			0.533467			-0.0399675	1.22975	-0.30813	1.08562		0.002997	0.594406	0.00999001		0.432367	2.1072	-0.310809	1.15342	-0.602035	1.10551		0.253746	0.386613	0.023976		0.126622	0.985226	-0.170971	0.449768	-0.17104	0.751115
6.17155			0.802198			-0.108425	1.19316	-0.231233	1.16472		0.003996	0.607393	0.017982		0.389301	2.08702	-0.339986	1.13207	-0.591377	1.07445		0.356643	0.431568	0.046953		0.110392	0.968793	-0.139162	0.490941	-0.149391	0.793355
6.23431			0.954046			-0.0851409	1.18709	-0.176078	1.21476		0.00599401	0.682318	0.023976		0.344085	1.9966	-0.396344	1.08477	-0.634433	1.01683		0.553447	0.431568	0.0929071		0.087999	0.939149	-0.114403	0.550275	-0.1646	0.870014
6.29707			0.933067			-0.0726471	1.17339	-0.126427	1.27312		0.013986	0.826174	0.031968		0.253373	1.88099	-0.439646	1.03804	-0.593629	0.951954		0.814186	0.377622	0.1998		0.0617264	0.892831	-0.091689	0.595131	-0.157316	0.950901
6.35983			0.888112			-0.07243	1.17145	-0.0848198	1.277		0.023976	0.99001	0.020979		0.189451	1.77671	-0.447295	1.00602	-0.523385	0.95537		0.958042	0.33966	0.323676		0.0375156	0.844122	-0.0644888	0.616031	-0.14806	1.01023
6.42259			0.919081			-0.0685431	1.17796	-0.085268	1.27745		0.024975	0.955045	0.014985		0.247198	1.80071	-0.442629	0.967296	-0.530897	0.954586		0.812188	0.316683	0.421578		-0.0158269	0.804996	-0.0651078	0.606806	-0.123446	1.0405
6.48536			0.996004			-0.0293472	1.21046	-0.116834	1.29494		0.018981	0.965035	0.00999001		0.306689	1.82343	-0.417001	0.993378	-0.575291	0.982648		0.808192	0.280719	0.404595		-0.0329068	0.812885	-0.0699081	0.599774	-0.129685	0.987996
6.54812			0.936064			-0.0394381	1.22363	-0.102796	1.27042		0.013986	0.887113	0.00999001		0.31149	1.8091	-0.425082	0.979936	-0.636365	0.930679		0.922078	0.268731	0.296703		0.00458016	0.838095	-0.0898157	0.574956	-0.113546	0.993291
6.61088			0.955045			-0.0309475	1.19401	-0.0819589	1.2504		0.014985	0.932068	0.012987		0.315797	1.79416	-0.434856	0.942307	-0.631692	0.962023		0.893107	0.277722	0.163836		0.0332407	0.853957	-0.106555	0.551982	-0.126389	0.962254
6.67364			0.899101			-0.0623132	1.15533	-0.048735	1.23106		0.025974	0.874126	0.016983		0.285398	1.75457	-0.424115	0.944823	-0.552698	1.03554		0.745255	0.301698	0.11988		0.0676948	0.874407	-0.129134	0.545094	-0.157407	0.961178
6.7364			0.708292			-0.133784	1.1046	-0.0612535	1.25973		0.0659341	0.637363	0.017982		0.233841	1.71205	-0.420676	0.935537	-0.471845	1.14373		0.694306	0.37962	0.131868		0.0503068	0.864876	-0.101539	0.552121	-0.163305	0.966529
6.79916			0.609391			-0.162049	1.08947	-0.0875025	1.29589		0.112887	0.506494	0.018981		0.215433	1.64665	-0.453418	0.899453	-0.43762	1.14904		0.792208	0.412587	0.207792		0.000976021	0.828531	-0.0929776	0.566477	-0.168479	0.977637
6.86192			0.583417			-0.178227	1.09907	-0.128587	1.32275		0.0929071	0.51049	0.013986		0.223403	1.60299	-0.52013	0.853455	-0.473223	1.13125		0.951049	0.392607	0.326673		-0.0378773	0.800233	-0.0845403	0.574268	-0.170102	0.957205
6.92469			0.585415			-0.174387	1.08461	-0.135642	1.33081		0.0629371	0.572428	0.00999001		0.233763	1.59442	-0.586484	0.843059	-0.541655	1.10582		0.965035	0.381618	0.375624		-0.0554471	0.779268	-0.0871827	0.561603	-0.156202	0.952165
6.98745			0.591409			-0.201765	1.10168	-0.122791	1.31992		0.040959	0.607393	0.00799201		0.251302	1.60046	-0.616134	0.846431	-0.556694	1.08702		0.997003	0.441558	0.411588		-0.0648556	0.796237	-0.104915	0.565918	-0.172919	0.93801
7.05021			0.589411			-0.217064	1.07288	-0.139892	1.32384		0.04995	0.613387	0.00699301		0.24193	1.65666	-0.609842	0.906335	-0.511068	1.06599		0.827173	0.622378	0.401598		-0.0304848	0.809989	-0.0917992	0.577694	-0.210557	0.895305
7.11297			0.699301			-0.211664	1.0364	-0.181352	1.27259		0.0779221	0.634366	0.016983		0.219602	1.63052	-0.572612	0.998481	-0.495678	1.09413		0.641359	0.776224	0.367632		-0.00919349	0.810363	-0.0787687	0.583438	-0.235838	0.860551
7.17573			0.914086			-0.1773	1.05963	-0.265449	1.17111		0.108891	0.721279	0.0529471		0.182004	1.60291	-0.548745	1.09673	-0.461158	1.08768		0.47952	0.839161	0.300699		-0.00175869	0.820513	-0.089794	0.557175	-0.246621	0.813336
7.23849			0.817183			-0.165646	1.0945	-0.317807	1.09487		0.113886	0.821179	0.0769231		0.171127	1.60098	-0.502157	1.13362	-0.474976	1.0722		0.408591	0.775225	0.202797		-0.0188939	0.844327	-0.135282	0.512045	-0.247471	0.786241
7.30126			0.684316			-0.131112	1.10384	-0.351229	1.04489		0.0989011	0.818182	0.0649351		0.245224	1.58468	-0.484641	1.12989	-0.474713	1.08973		0.357642	0.687313	0.144855		-0.0210135	0.837897	-0.20072	0.484182	-0.257331	0.767614
7.36402			0.731269			-0.150009	1.12092	-0.279075	1.01446		0.0889111	0.668332	0.032967		0.290665	1.63918	-0.515933	1.05206	-0.393362	1.13034		0.350649	0.643357	0.123876		-0.020952	0.795981	-0.220825	0.477644	-0.267778	0.765212
7.42678			0.916084			-0.18943	1.09997	-0.241154	1.05866		0.122877	0.492507	0.020979		0.291244	1.67361	-0.549445	0.989148	-0.328405	1.21839		0.380619	0.666334	0.13986		-0.0232508	0.775274	-0.211259	0.47721	-0.25945	0.74297
7.48954			0.909091			-0.206042	1.07574	-0.222428	1.12529		0.176823	0.402597	0.022977		0.234151	1.64804	-0.545893	0.963357	-0.323724	1.2118		0.414585	0.624376	0.145854		-0.0357471	0.806221	-0.197427	0.467044	-0.258487	0.72775
7.5523			0.82018			-0.20938	1.04345	-0.174531	1.17855		0.212787	0.45954	0.045954		0.152447	1.56651	-0.523885	0.965411	-0.421037	1.16387		0.437562	0.495504	0.101898		0.00685609	0.841667	-0.203881	0.45992	-0.22807	0.725381
7.61506			0.836164			-0.206683	1.04383	-0.216492	1.17268		0.157842	0.675325	0.0639361		0.125134	1.49159	-0.557466	0.990419	-0.549446	1.07408		0.415584	0.34965	0.0559441		0.0388693	0.885898	-0.231611	0.436172	-0.189573	0.763026
7.67782			0.901099			-0.216269	1.03726	-0.292688	1.18102		0.0929071	0.905095	0.0769231		0.145617	1.47033	-0.580536	1.04502	-0.634413	1.02982		0.362637	0.314685	0.028971		0.0548399	0.889348	-0.238212	0.425565	-0.149928	0.757774
7.74059			0.988012			-0.221838	1.04801	-0.38748	1.1581		0.0599401	0.951049	0.0709291		0.160203	1.47491	-0.541411	1.04676	-0.644835	1.02194		0.308691	0.350649	0.02997		0.0709089	0.897462	-0.220558	0.441872	-0.179486	0.747027
7.80335			0.978022			-0.194578	1.04657	-0.402162	1.13944		0.0539461	0.857143	0.0859141		0.152967	1.50202	-0.505219	1.05466	-0.612367	1.01341		0.317682	0.482517	0.0559441		0.0637767	0.887012	-0.191207	0.476125	-0.194337	0.746321
7.86611			0.942058			-0.184139	1.03216	-0.354949	1.10282		0.0809191	0.745255	0.16983		0.143349	1.45604	-0.474923	1.15118	-0.588677	0.979318		0.384615	0.612388	0.116883		0.0249746	0.869668	-0.193032	0.510887	-0.191991	0.746474
7.92887			0.934066			-0.2201	1.01169	-0.361151	1.07397		0.105894	0.644356	0.324675		0.1022	1.36682	-0.404713	1.22144	-0.578399	0.974313		0.525475	0.597403	0.190809		-0.0138086	0.828261	-0.165085	0.534993	-0.184388	0.769065
7.99163			0.983017			-0.251167	0.95313	-0.371329	1.03503		0.116883	0.554446	0.466533		0.0796082	1.30498	-0.376	1.27092	-0.617199	0.915029		0.662338	0.512488	0.232767		-0.048461	0.801276	-0.164798	0.546968	-0.16906	0.765621
8.05439			0.954046			-0.258091	0.898993	-0.33122	1.03254		0.104895	0.518482	0.485514		0.0749093	1.28728	-0.423052	1.29853	-0.651655	0.896797		0.763237	0.440559	0.251748		-0.0738714	0.775125	-0.185675	0.532387	-0.17184	0.758874
8.11715			0.86014			-0.27572	0.902525	-0.301844	1.05053		0.10989	0.51049	0.490509		0.0605164	1.29779	-0.398965	1.29963	-0.653042	0.915029		0.8002	0.428571	0.271728		-0.0812927	0.727663	-0.191092	0.4929	-0.191853	0.759128
8.17992			0.771229			-0.247596	0.970822	-0.285865	1.13422		0.125874	0.496503	0.54046		0.00220092	1.27988	-0.424678	1.30006	-0.672413	0.966972		0.786214	0.455544	0.282717		-0.0784008	0.742804	-0.220848	0.464253	-0.219723	0.768585
8.24268			0.653347			-0.211101	0.97311	-0.255133	1.24287		0.171828	0.451548	0.674326		-0.0846361	1.18843	-0.423278	1.24718	-0.708137	0.925393		0.745255	0.485514	0.270729		-0.0923765	0.732273	-0.220283	0.462761	-0.225163	0.771174
8.30544			0.493506			-0.247812	0.916669	-0.227908	1.2895		0.215784	0.428571	0.764236		-0.149089	1.06256	-0.427212	1.17829	-0.722094	0.886727		0.667333	0.504496	0.224775		-0.0774811	0.749015	-0.236885	0.465042	-0.24606	0.791183
8.3682			0.336663			-0.320155	0.81921	-0.248464	1.27758		0.233766	0.437562	0.767233		-0.174477	1.05553	-0.466783	1.17904	-0.684887	0.878991		0.545455	0.561439	0.172827		-0.0339436	0.764607	-0.238127	0.450371	-0.253726	0.779367
8.43096			0.271728			-0.392451	0.759522	-0.242639	1.21999		0.252747	0.498501	0.712288		-0.151625	1.09983	-0.498691	1.22454	-0.625884	0.868977		0.428571	0.68032	0.174825		-0.0244818	0.754472	-0.221539	0.455692	-0.264162	0.753851
8.49372			0.233766			-0.39409	0.706589	-0.201376	1.24743		0.327672	0.604396	0.715285		-0.16614	1.20033	-0.467447	1.29292	-0.515361	0.910107		0.397602	0.85015	0.261738		-0.0372132	0.732331	-0.208794	0.488374	-0.266721	0.727273
8.55649			0.263736			-0.361557	0.729361	-0.183111	1.26037		0.44955	0.674326	0.788212		-0.186561	1.22862	-0.420608	1.32561	-0.520335	0.993416		0.504496	0.945055	0.411588		-0.0663415	0.705083	-0.172807	0.51389	-0.287348	0.711076
8.61925			0.294705			-0.324716	0.774043	-0.216003	1.29426		0.55045	0.731269	0.833167		-0.199371	1.26198	-0.389876	1.27483	-0.492031	1.00704		0.742258	0.886114	0.587413		-0.127813	0.692227	-0.141531	0.527053	-0.26211	0.732849
8.68201			0.292707			-0.340457	0.743499	-0.225396	1.2588		0.533467	0.756244	0.788212		-0.204881	1.18475	-0.450747	1.2005	-0.550977	1.00676		0.975025	0.692308	0.647353		-0.116095	0.693604	-0.139595	0.509994	-0.23377	0.791383
8.74477			0.273726			-0.386405	0.712939	-0.289609	1.24376		0.397602	0.742258	0.634366		-0.175715	1.15293	-0.516307	1.12228	-0.605934	0.940403		0.903097	0.480519	0.536464		-0.119316	0.696517	-0.153729	0.502237	-0.211434	0.823286
8.80753			0.314685			-0.385776	0.70633	-0.356077	1.28813		0.251748	0.669331	0.507493		-0.177105	1.09844	-0.563417	1.08483	-0.711453	0.893601		0.966034	0.374625	0.376623		-0.0926933	0.716488	-0.185945	0.46255	-0.206016	0.834991
8.87029			0.404595			-0.341623	0.76268	-0.371454	1.29419		0.168831	0.543457	0.503497		-0.190093	1.08086	-0.520356	1.10902	-0.797355	0.857769		0.915085	0.355644	0.26973		-0.0907707	0.727133	-0.221391	0.443352	-0.207258	0.806621
8.93305			0.517483			-0.329888	0.804163	-0.343171	1.23913		0.138861	0.438561	0.579421		-0.177005	1.09859	-0.462676	1.19777	-0.871936	0.844673		0.916084	0.371628	0.267732		-0.120439	0.701135	-0.240436	0.46307	-0.200069	0.770984
8.99582			0.55045			-0.351118	0.779259	-0.373452	1.21423		0.124875	0.397602	0.629371		-0.116449	1.16748	-0.429206	1.24272	-0.865649	0.845959		0.888112	0.332667	0.388611		-0.169071	0.630901	-0.245668	0.460725	-0.203068	0.806006
9.05858			0.46953			-0.393653	0.717732	-0.393039	1.1764		0.0949051	0.411588	0.517483		-0.0730175	1.2075	-0.429423	1.24226	-0.873094	0.791702		0.537463	0.264735	0.622378		-0.227022	0.565808	-0.230291	0.453143	-0.181447	0.833125
9.12134			0.382617			-0.437603	0.694991	-0.347615	1.13279		0.0629371	0.443556	0.378621		-0.0594402	1.22071	-0.495673	1.15159	-0.916416	0.748822		0.300699	0.191808	0.829171		-0.259337	0.535793	-0.234001	0.471507	-0.154381	0.872545
9.1841			0.358641			-0.461242	0.682325	-0.329035	1.13815		0.034965	0.435564	0.272727		-0.0839586	1.19053	-0.544832	1.0723	-0.949345	0.698414		0.1998	0.143856	0.892108		-0.267041	0.523471	-0.218757	0.491175	-0.139234	0.915206
9.24686			0.383616			-0.434345	0.701152	-0.305551	1.18779		0.026973	0.407592	0.25974		-0.0758471	1.18622	-0.549918	1.06292	-0.972737	0.726152		0.194805	0.123876	0.81019		-0.23627	0.546874	-0.225397	0.491704	-0.130644	0.947378
9.30962			0.400599			-0.430407	0.718506	-0.294034	1.19652		0.028971	0.402597	0.286713		-0.0361075	1.2151	-0.520807	1.14074	-0.931486	0.76523		0.226773	0.115884	0.688312		-0.197198	0.593086	-0.221287	0.493997	-0.115191	0.942355
9.37238			0.35964			-0.450129	0.758287	-0.298755	1.27969		0.0509491	0.470529	0.346653		-0.00467662	1.25851	-0.501544	1.20691	-0.867174	0.821533		0.256743	0.101898	0.572428		-0.187706	0.626424	-0.231747	0.496962	-0.0885838	0.958146
9.43515			0.277722			-0.47454	0.730441	-0.299863	1.32405		0.0999001	0.581419	0.397602		-0.0137636	1.25698	-0.506703	1.21198	-0.742394	0.908507		0.253746	0.0739261	0.487512		-0.181467	0.604478	-0.241808	0.444293	-0.0880561	0.978976
9.49791			0.227772			-0.452837	0.699668	-0.2654	1.30903		0.177822	0.639361	0.504496		-0.0718276	1.14321	-0.51986	1.22312	-0.691153	0.977981		0.232767	0.044955	0.420579		-0.185029	0.601704	-0.255411	0.437138	-0.0894647	1.00665
9.56067			0.228771			-0.397881	0.73574	-0.234976	1.35082		0.263736	0.614386	0.692308		-0.173535	1.01683	-0.516436	1.22892	-0.713262	0.955753		0.207792	0.031968	0.373626		-0.190236	0.598999	-0.26502	0.430018	-0.098887	1.02715
9.62343			0.304695			-0.343423	0.771535	-0.204187	1.32553		0.28971	0.524476	0.887113		-0.276309	0.966086	-0.506802	1.24043	-0.750616	0.904481		0.201798	0.038961	0.406593		-0.185705	0.59718	-0.265865	0.450361	-0.0703356	1.02546
9.68619			0.347652			-0.355409	0.787914	-0.249684	1.26393		0.262737	0.485514	0.888112		-0.298685	1.02607	-0.504716	1.21621	-0.792817	0.84869		0.188811	0.0509491	0.504496		-0.188469	0.610232	-0.266867	0.481742	-0.046539	1.01383
9.74895			0.357642			-0.407279	0.718688	-0.318104	1.17872		0.21978	0.522478	0.731269		-0.290253	1.10192	-0.535064	1.19017	-0.820216	0.827105		0.152847	0.0689311	0.654346		-0.222611	0.601958	-0.256494	0.531567	-0.0202425	1.01011
9.81172			0.392607			-0.434082	0.683141	-0.364531	1.09826		0.205794	0.642358	0.529471		-0.270726	1.18403	-0.55701	1.10572	-0.840619	0.797005		0.117882	0.0659341	0.784216		-0.266433	0.594584	-0.252472	0.556213	-0.0271441	1.03679
9.87448			0.455544			-0.424995	0.693106	-0.392937	1.04125		0.198801	0.716284	0.447552		-0.250211	1.20889	-0.591108	1.04537	-0.826654	0.81852		0.102897	0.0609391	0.848152		-0.288534	0.59849	-0.23831	0.538177	-0.0334587	1.06122
9.93724			0.64036			-0.398566	0.722705	-0.438715	0.966885		0.197802	0.669331	0.470529		-0.279978	1.24202	-0.568788	1.04512	-0.84399	0.798556		0.10989	0.0629371	0.861139		-0.289012	0.587764	-0.230976	0.531843	-0.033173	1.06745
10			0.861139			-0.386185	0.764139	-0.48662	0.921851		0.221778	0.573427	0.573427		-0.283318	1.31238	-0.519196	1.08978	-0.851223	0.814422		0.127872	0.0809191	0.872128		-0.284397	0.580865	-0.232474	0.51482	-0.0480335	1.06363

## Sheet: S2B
Punishment (Exp. 2 - AI Photom group)
		Permutation Tests							Bootstrap tests
Time		REW-AC	REW-INAC	AC-INAC	PUN-REW	PUN-AC	PUN-INAC		REW		AC		INAC		PUN
-5		0.260739	0.273726	0.846154	0.294705	0.23976	0.861139		-0.732543	1.42163	-0.508966	0.275266	-0.765173	0.370194	-0.663659	0.911596
-4.93724		0.337662	0.404595	0.99001	0.182817	0.196803	0.837163		-0.7621	1.12832	-0.557779	0.186775	-0.769207	0.327882	-0.678365	0.94607
-4.87448		0.859141	0.9001	0.626374	0.211788	0.408591	0.48951		-0.948306	0.790826	-0.568001	0.150998	-0.667728	0.377621	-0.754855	0.818645
-4.81172		0.51049	0.273726	0.36963	0.44955	0.96004	0.348651		-1.18704	0.551346	-0.539225	0.125028	-0.518065	0.443461	-0.805048	0.730042
-4.74895		0.293706	0.157842	0.40959	0.796204	0.756244	0.385614		-1.20498	0.408295	-0.483841	0.172587	-0.515013	0.491512	-0.944374	0.702724
-4.68619		0.352647	0.261738	0.684316	0.812188	0.946054	0.448551		-1.04203	0.479128	-0.433131	0.240254	-0.53815	0.438586	-0.85661	0.794832
-4.62343		0.554446	0.6004	0.977023	0.579421	0.59041	0.422577		-0.832459	0.606264	-0.40219	0.2797	-0.527597	0.356756	-0.693849	0.813356
-4.56067		0.617383	0.739261	0.803197	0.396603	0.275724	0.300699		-0.705344	0.494172	-0.361827	0.29081	-0.469516	0.312592	-0.43005	0.820878
-4.49791		0.415584	0.448551	0.818182	0.417582	0.282717	0.133866		-0.740704	0.356205	-0.379911	0.340627	-0.420204	0.352062	-0.389016	0.761215
-4.43515		0.252747	0.212787	0.863137	0.573427	0.421578	0.0819181		-0.782841	0.33728	-0.381778	0.383156	-0.394075	0.363007	-0.444187	0.654496
-4.37238		0.210789	0.202797	0.781219	0.586414	0.406593	0.0629371		-0.810908	0.318552	-0.370426	0.392827	-0.407216	0.333012	-0.402651	0.737886
-4.30962		0.251748	0.346653	0.663337	0.408591	0.232767	0.0589411		-0.826051	0.271306	-0.31643	0.324761	-0.443152	0.309749	-0.366948	0.760634
-4.24686		0.363636	0.533467	0.752248	0.192807	0.140859	0.0709291		-0.775138	0.535032	-0.3145	0.291312	-0.442937	0.353016	-0.326549	0.782147
-4.1841		0.424575	0.417582	0.893107	0.154845	0.227772	0.111888		-0.996724	0.634947	-0.325504	0.297429	-0.393412	0.396931	-0.247342	0.738474
-4.12134		0.273726	0.141858	0.539461	0.287712	0.606394	0.106893		-1.13777	0.501604	-0.341268	0.293341	-0.35612	0.454604	-0.380756	0.664837
-4.05858		0.128871	0.02997	0.51049	0.651349	0.968032	0.110889		-0.947161	0.27361	-0.32348	0.3202	-0.27026	0.451146	-0.585452	0.773763
-3.99582		0.0909091	0.02997	0.916084	0.987013	0.93007	0.13986		-0.855501	0.103806	-0.32704	0.334337	-0.318219	0.377231	-0.712729	0.730546
-3.93305		0.131868	0.206793	0.503497	0.751249	0.842158	0.24975		-0.817776	0.140184	-0.291986	0.398945	-0.402586	0.264119	-0.656372	0.524792
-3.87029		0.325674	0.806194	0.276723	0.651349	0.71029	0.618382		-0.792622	0.569491	-0.274842	0.366896	-0.469117	0.223842	-0.549616	0.448181
-3.80753		0.782218	0.831169	0.41958	0.704296	0.836164	0.973027		-0.773084	0.825457	-0.289103	0.278689	-0.416052	0.224605	-0.615781	0.521248
-3.74477		0.693307	0.765235	0.929071	0.959041	0.997003	0.809191		-0.672197	0.983395	-0.338038	0.222435	-0.372465	0.31623	-0.531469	0.557573
-3.68201		0.395604	0.674326	0.573427	0.6004	0.912088	0.793207		-0.511944	0.781747	-0.386081	0.224191	-0.369054	0.393304	-0.415352	0.585718
-3.61925		0.282717	0.395604	0.842158	0.490509	0.637363	0.738262		-0.45803	0.878746	-0.320067	0.25687	-0.379573	0.385141	-0.434193	0.697389
-3.55649		0.284715	0.13986	0.362637	0.859141	0.453546	0.528472		-0.311095	0.969791	-0.189205	0.353121	-0.463136	0.332003	-0.528449	0.75812
-3.49372		0.40959	0.0749251	0.116883	0.592408	0.614386	0.324675		-0.165624	0.966205	-0.116875	0.490967	-0.464534	0.301154	-0.634784	0.785317
-3.43096		0.627373	0.13986	0.176823	0.360639	0.944056	0.276723		-0.165754	0.781726	-0.138424	0.571571	-0.403512	0.393376	-0.726839	0.783795
-3.3682		0.797203	0.496503	0.556444	0.424575	0.752248	0.426573		-0.292288	0.837194	-0.172287	0.540605	-0.298822	0.51801	-0.628766	0.670071
-3.30544		0.87013	0.956044	0.766234	0.866134	0.698302	0.774226		-0.339566	0.687409	-0.275287	0.427483	-0.278498	0.622683	-0.402097	0.581471
-3.24268		0.777223	0.812188	0.48951	0.709291	0.843157	0.926074		-0.339485	0.452803	-0.340113	0.325816	-0.369116	0.616739	-0.279464	0.498878
-3.17992		0.639361	0.975025	0.562438	0.762238	0.862138	0.809191		-0.478056	0.609697	-0.405685	0.289097	-0.38923	0.540385	-0.347482	0.480667
-3.11715		0.581419	0.767233	0.723277	0.736264	0.587413	0.408591		-0.614253	0.841956	-0.360785	0.298659	-0.409679	0.557998	-0.542906	0.325656
-3.05439		0.687313	0.876124	0.731269	0.275724	0.257742	0.271728		-0.60698	0.861888	-0.295322	0.301537	-0.391505	0.557821	-0.71869	0.241593
-2.99163		0.987013	0.683317	0.48951	0.172827	0.0929071	0.374625		-0.636804	0.587202	-0.286974	0.294624	-0.318513	0.567184	-0.840869	0.329057
-2.92887		0.659341	0.340659	0.377622	0.325674	0.0979021	0.719281		-0.718134	0.521513	-0.291081	0.295022	-0.289301	0.570699	-0.929494	0.448499
-2.86611		0.706294	0.431568	0.493506	0.609391	0.304695	0.951049		-0.88488	0.693703	-0.332666	0.260224	-0.295693	0.49388	-0.865592	0.550934
-2.80335		0.837163	0.936064	0.87013	0.943057	0.833167	0.85015		-0.805214	0.830782	-0.349838	0.254522	-0.359965	0.382373	-0.669177	0.613246
-2.74059		0.333666	0.278721	0.763237	0.836164	0.685315	0.546454		-0.597769	0.988613	-0.354827	0.28857	-0.4077	0.33469	-0.566853	0.608735
-2.67782		0.183816	0.142857	0.703297	0.851149	0.663337	0.340659		-0.486754	1.07361	-0.316405	0.324944	-0.46138	0.378308	-0.525955	0.590073
-2.61506		0.275724	0.283716	0.887113	0.906094	0.997003	0.306693		-0.326139	0.831178	-0.286373	0.380994	-0.499535	0.470953	-0.556237	0.566791
-2.5523		0.593407	0.71029	0.918082	0.591409	0.538462	0.348651		-0.487982	0.704379	-0.316669	0.371367	-0.461953	0.536076	-0.667126	0.497434
-2.48954		0.772228	0.93007	0.798202	0.398601	0.262737	0.334665		-0.587711	0.74177	-0.364148	0.411875	-0.375336	0.533584	-0.722392	0.445593
-2.42678		0.496503	0.669331	0.732268	0.351648	0.227772	0.171828		-0.48611	0.92805	-0.387097	0.402133	-0.371074	0.517824	-0.779575	0.417299
-2.36402		0.151848	0.337662	0.658342	0.461538	0.340659	0.0789211		-0.262964	1.03497	-0.333617	0.363327	-0.398209	0.575189	-0.735395	0.499875
-2.30126		0.0749251	0.220779	0.631369	0.595405	0.453546	0.0799201		-0.169424	1.07196	-0.300014	0.388758	-0.348946	0.588079	-0.692808	0.661559
-2.23849		0.227772	0.302697	0.822178	0.536464	0.456543	0.17982		-0.294584	0.978724	-0.291624	0.398193	-0.32481	0.538001	-0.732454	0.693464
-2.17573		0.85015	0.677323	0.783217	0.358641	0.473526	0.398601		-0.525217	0.86955	-0.329686	0.47281	-0.370766	0.475235	-0.803572	0.59964
-2.11297		0.693307	0.901099	0.466533	0.273726	0.55045	0.628372		-0.898991	0.873912	-0.325278	0.538829	-0.497866	0.429248	-0.896711	0.550349
-2.05021		0.746254	0.777223	0.398601	0.328671	0.76024	0.651349		-1.01104	0.976014	-0.343406	0.569428	-0.59146	0.406983	-0.905095	0.592779
-1.98745		0.876124	0.586414	0.564436	0.525475	0.799201	0.523477		-0.841134	1.15306	-0.379865	0.553463	-0.547336	0.481714	-0.913712	0.670023
-1.92469		0.539461	0.503497	0.98002	0.601399	0.633367	0.386613		-0.694417	1.35102	-0.451502	0.546016	-0.463271	0.626355	-1.01926	0.818997
-1.86192		0.478521	0.612388	0.677323	0.506494	0.328671	0.278721		-0.689237	1.43211	-0.465508	0.5276	-0.371486	0.745275	-1.14322	0.768614
-1.79916		0.567433	0.752248	0.621379	0.37962	0.195804	0.275724		-0.810983	1.60183	-0.496713	0.524326	-0.350945	0.726288	-1.13998	0.770326
-1.7364		0.645355	0.725275	0.825175	0.447552	0.345654	0.396603		-0.987076	1.8161	-0.538993	0.564111	-0.425609	0.682932	-1.07917	0.828508
-1.67364		0.573427	0.541459	0.983017	0.899101	0.913087	0.619381		-1.01115	2.01951	-0.560014	0.647703	-0.530115	0.629424	-0.917778	1.02463
-1.61088		0.448551	0.437562	0.99001	0.53047	0.57043	0.834166		-0.972192	2.0959	-0.531289	0.689112	-0.561965	0.713625	-0.66883	1.32382
-1.54812		0.40959	0.498501	0.822178	0.301698	0.44955	0.965035		-1.07779	2.12556	-0.519593	0.757449	-0.546854	0.955448	-0.413732	1.50035
-1.48536		0.496503	0.77023	0.633367	0.328671	0.665335	0.94006		-1.08089	1.98534	-0.497478	0.828995	-0.456689	1.28633	-0.37214	1.48594
-1.42259		0.777223	0.931069	0.583417	0.491508	0.917083	0.812188		-1.16619	1.69435	-0.487668	0.849965	-0.460073	1.48561	-0.40986	1.38902
-1.35983		0.817183	0.642358	0.593407	0.61039	0.98002	0.522478		-1.44151	1.42711	-0.465543	0.797378	-0.500223	1.46459	-0.459358	1.36422
-1.29707		0.462537	0.374625	0.534466	0.518482	0.971029	0.264735		-1.79769	1.23414	-0.495256	0.696933	-0.561544	1.44762	-0.421791	1.41748
-1.23431		0.31968	0.18981	0.364635	0.370629	0.96004	0.144855		-2.02721	1.15235	-0.544335	0.616291	-0.529037	1.33534	-0.404739	1.38613
-1.17155		0.365634	0.123876	0.152847	0.327672	0.828172	0.170829		-2.03104	1.20869	-0.595956	0.533908	-0.407621	1.39653	-0.493962	1.31189
-1.10879		0.592408	0.130869	0.0669331	0.464535	0.473526	0.354645		-1.81663	1.37176	-0.641665	0.517778	-0.304165	1.47709	-0.648026	1.18655
-1.04603		0.925075	0.234765	0.048951	0.695305	0.308691	0.717283		-1.47188	1.54461	-0.637892	0.531343	-0.229673	1.58814	-0.776888	1.11815
-0.983264		0.825175	0.408591	0.0899101	0.822178	0.321678	0.994006		-1.19169	1.62727	-0.557935	0.584293	-0.233459	1.64302	-0.768408	1.11577
-0.920502		0.776224	0.509491	0.140859	0.789211	0.435564	1		-1.18088	1.74807	-0.504626	0.617273	-0.290348	1.59325	-0.744749	1.18649
-0.857741		0.84016	0.511489	0.145854	0.638362	0.567433	0.871129		-1.20017	1.86101	-0.464694	0.645364	-0.302131	1.47867	-0.659441	1.23571
-0.794979		0.768232	0.503497	0.106893	0.53047	0.556444	0.853147		-1.18444	1.88197	-0.463898	0.604218	-0.278077	1.46887	-0.680509	1.31673
-0.732218		0.557443	0.629371	0.0789211	0.563437	0.498501	0.969031		-1.04776	1.92915	-0.489237	0.60121	-0.284471	1.44509	-0.86402	1.48435
-0.669456		0.368631	0.833167	0.104895	0.688312	0.47952	0.739261		-0.887652	1.90082	-0.466019	0.65538	-0.292728	1.4355	-0.993969	1.59736
-0.606695		0.3996	0.914086	0.183816	0.791209	0.514486	0.691309		-0.854346	1.83837	-0.455366	0.681024	-0.242446	1.36714	-1.07324	1.64436
-0.543933		0.683317	0.704296	0.235764	0.808192	0.559441	0.906094		-1.02206	1.6989	-0.462803	0.730116	-0.230691	1.3045	-0.962977	1.64376
-0.481172		0.9001	0.350649	0.212787	0.7003	0.585415	0.678322		-1.28361	1.50354	-0.465198	0.733121	-0.210719	1.39946	-0.757195	1.59081
-0.41841		0.583417	0.198801	0.158841	0.547453	0.663337	0.373626		-1.43289	1.36956	-0.461367	0.776337	-0.20717	1.7005	-0.681606	1.63112
-0.355649		0.461538	0.195804	0.17982	0.462537	0.768232	0.271728		-1.51022	1.28343	-0.431333	0.845588	-0.247894	2.05957	-0.619928	1.77766
-0.292887		0.388611	0.234765	0.286713	0.574426	0.78022	0.294705		-1.3659	1.15443	-0.345754	0.971061	-0.275132	2.24604	-0.706001	1.93542
-0.230126		0.312687	0.246753	0.413586	0.89011	0.678322	0.381618		-1.31481	1.08669	-0.24213	1.10558	-0.317901	2.28474	-0.817896	1.95811
-0.167364		0.236763	0.187812	0.427572	0.866134	0.534466	0.428571		-1.4133	1.00741	-0.213886	1.19498	-0.24152	2.2967	-0.895892	1.86178
-0.104603		0.183816	0.123876	0.332667	0.894106	0.466533	0.370629		-1.61326	1.06511	-0.188799	1.17118	-0.17355	2.30726	-0.892046	1.84241
-0.041841		0.171828	0.11988	0.255744	0.761239	0.611389	0.216783		-1.80126	1.12318	-0.204796	1.15789	-0.159039	2.42453	-0.833978	2.11221
0.0209205		0.145854	0.127872	0.272727	0.384615	0.92008	0.105894		-1.77707	1.0825	-0.182041	1.17659	-0.205658	2.51482	-0.553223	2.39343
0.083682		0.0809191	0.126873	0.373626	0.296703	0.941059	0.048951		-1.71262	0.91106	-0.0741724	1.17991	-0.247043	2.64029	-0.315302	2.56259
0.146444		0.03996	0.0859141	0.420579	0.424575	0.998002	0.032967		-1.72372	0.861916	0.0246243	1.24718	-0.176165	2.64228	-0.312583	2.59322
0.209205		0.018981	0.035964	0.310689	0.535465	0.827173	0.031968		-1.66186	0.749046	0.0927013	1.32857	0.0925583	2.74966	-0.367743	2.67572
0.271967		0.012987	0.011988	0.150849	0.25974	0.912088	0.021978		-1.59294	0.725271	0.0821906	1.3562	0.304836	3.01835	-0.248782	3.22281
0.334728		0.021978	0.012987	0.0659341	0.016983	0.53047	0.00899101		-1.41758	0.688965	0.0589447	1.3847	0.460183	3.1165	0.124966	4.53514
0.39749		0.037962	0.014985	0.0549451	0.001998	0.11988	0.00599401		-1.34542	0.758167	0.0555622	1.4497	0.480672	3.092	0.56961	6.22583
0.460251		0.04995	0.01998	0.0729271	0.000999001	0.018981	0.003996		-1.28908	0.873092	0.107119	1.53705	0.482728	3.03253	0.954018	7.70961
0.523013		0.0629371	0.014985	0.0969031	0.000999001	0.00599401	0.003996		-1.30121	1.01087	0.158986	1.78931	0.62451	2.97797	1.24452	8.59103
0.585774		0.0839161	0.00999001	0.115884	0.000999001	0.001998	0.001998		-1.39573	1.21792	0.205386	1.94784	0.758553	2.95181	1.42994	9.09555
0.648536		0.0979021	0.014985	0.146853	0.000999001	0.001998	0.000999001		-1.347	1.37674	0.227858	2.00093	0.758636	2.91075	1.61387	9.56523
0.711297		0.117882	0.032967	0.277722	0.000999001	0.000999001	0.000999001		-1.23374	1.54185	0.242923	1.96215	0.605301	2.78438	1.91172	10.0174
0.774059		0.138861	0.0829171	0.553447	0.000999001	0.000999001	0.000999001		-1.15803	1.58251	0.270118	2.01599	0.373444	2.56581	2.26816	10.4754
0.83682		0.1998	0.15984	0.775225	0.000999001	0.000999001	0.000999001		-1.14371	1.68787	0.260772	1.92639	0.233889	2.37517	2.50306	10.7045
0.899582		0.310689	0.212787	0.652348	0.000999001	0.000999001	0.000999001		-1.211	2.00598	0.154694	1.90498	0.222392	2.38075	2.44236	10.7365
0.962343		0.486513	0.20979	0.360639	0.000999001	0.000999001	0.004995		-1.3376	2.17875	0.0195902	1.89704	0.342149	2.59144	2.25884	10.5216
1.0251		0.562438	0.166833	0.191808	0.000999001	0.000999001	0.00599401		-1.36426	2.17563	-0.0813893	1.81548	0.454524	2.77425	2.12595	10.3385
1.08787		0.502498	0.118881	0.150849	0.000999001	0.001998	0.002997		-1.26635	1.94297	-0.0978432	1.74738	0.451585	2.72534	2.07807	10.3887
1.15063		0.341658	0.0749251	0.154845	0.000999001	0.000999001	0.002997		-1.20264	1.5219	-0.024925	1.6831	0.348732	2.64847	2.18078	10.6903
1.21339		0.248751	0.04995	0.161838	0.000999001	0.000999001	0.001998		-1.35559	1.22644	-0.0486842	1.60674	0.262458	2.63384	2.26109	10.9058
1.27615		0.25974	0.0549451	0.155844	0.000999001	0.000999001	0.001998		-1.41294	1.22647	-0.080007	1.52337	0.188001	2.54522	2.24702	11.0993
1.33891		0.420579	0.0979021	0.151848	0.000999001	0.000999001	0.001998		-1.29442	1.41796	-0.0970363	1.49798	0.218785	2.48681	2.28544	11.1462
1.40167		0.529471	0.198801	0.256743	0.000999001	0.000999001	0.001998		-1.13629	1.60134	-0.10678	1.50412	0.192433	2.39553	2.27166	11.2652
1.46444		0.543457	0.308691	0.497502	0.000999001	0.000999001	0.001998		-1.0887	1.63754	-0.0521975	1.5259	0.0633981	2.21038	2.36945	11.493
1.5272		0.48951	0.358641	0.712288	0.000999001	0.000999001	0.001998		-1.20921	1.67751	-0.0698043	1.53325	-0.061422	2.05941	2.44406	11.6841
1.58996		0.51049	0.321678	0.608392	0.000999001	0.000999001	0.001998		-1.17207	1.57393	-0.178454	1.48602	-0.0453668	2.07418	2.5231	11.7687
1.65272		0.616384	0.262737	0.343656	0.000999001	0.000999001	0.000999001		-1.22337	1.64435	-0.27577	1.39197	0.0400774	2.1239	2.49467	11.886
1.71548		0.752248	0.260739	0.218781	0.000999001	0.000999001	0.001998		-1.19546	1.75477	-0.335897	1.41281	0.0889218	2.13784	2.38392	11.9237
1.77824		0.747253	0.314685	0.291708	0.000999001	0.000999001	0.002997		-1.17034	1.81652	-0.323087	1.43959	0.0295364	2.11606	2.23077	12.0615
1.841		0.667333	0.413586	0.553447	0.000999001	0.000999001	0.002997		-1.21548	1.80884	-0.25528	1.46972	-0.148264	1.96266	2.04545	12.0283
1.90377		0.64036	0.539461	0.842158	0.000999001	0.000999001	0.002997		-1.27964	1.80288	-0.20549	1.5453	-0.280607	1.8439	1.94665	11.8603
1.96653		0.755245	0.717283	0.957043	0.000999001	0.000999001	0.004995		-1.18316	1.93914	-0.203218	1.54133	-0.336545	1.82563	2.10804	11.6811
2.02929		0.947053	0.913087	0.953047	0.000999001	0.000999001	0.00599401		-0.960965	2.10878	-0.250198	1.54241	-0.30708	1.83359	2.18246	11.6022
2.09205		0.93007	0.936064	0.996004	0.000999001	0.000999001	0.003996		-0.827414	2.19086	-0.260854	1.56399	-0.302671	1.769	2.20993	11.6606
2.15481		0.919081	0.857143	0.898102	0.000999001	0.000999001	0.003996		-0.839475	2.14018	-0.240429	1.57492	-0.391609	1.62955	2.22549	11.7206
2.21757		0.975025	0.864136	0.851149	0.000999001	0.000999001	0.003996		-1.04595	2.05548	-0.304089	1.51726	-0.519447	1.49858	2.17036	11.6747
2.28033		0.938062	0.883117	0.929071	0.000999001	0.000999001	0.002997		-1.21557	2.11633	-0.349828	1.4698	-0.594415	1.53	2.1609	11.6463
2.3431		0.759241	0.818182	0.945055	0.000999001	0.000999001	0.002997		-1.19163	2.37146	-0.467949	1.37979	-0.693893	1.69194	2.28719	11.7097
2.40586		0.62038	0.694306	0.962038	0.000999001	0.000999001	0.001998		-0.946148	2.52823	-0.453996	1.437	-0.653115	1.84881	2.36974	11.7921
2.46862		0.616384	0.572428	0.839161	0.000999001	0.000999001	0.001998		-0.732933	2.48755	-0.326094	1.53937	-0.649623	1.91134	2.24457	11.7784
2.53138		0.726274	0.502498	0.614386	0.000999001	0.000999001	0.002997		-0.693747	2.45037	-0.254476	1.58202	-0.642918	1.78797	2.05365	11.6655
2.59414		0.796204	0.512488	0.574426	0.000999001	0.000999001	0.00599401		-0.753955	2.41207	-0.269358	1.54621	-0.662533	1.63543	1.7057	11.4775
2.6569		0.747253	0.58042	0.74026	0.000999001	0.000999001	0.012987		-1.06009	2.46946	-0.3865	1.41616	-0.614065	1.57923	1.46102	11.3531
2.71967		0.63037	0.646354	0.989011	0.000999001	0.000999001	0.014985		-1.30026	2.52758	-0.522292	1.27382	-0.63942	1.61121	1.33977	11.257
2.78243		0.597403	0.702298	0.9001	0.000999001	0.000999001	0.010989		-1.45466	2.70649	-0.563589	1.23065	-0.646382	1.61868	1.47057	11.2863
2.84519		0.739261	0.747253	0.999001	0.000999001	0.000999001	0.002997		-1.28413	2.45972	-0.522847	1.19942	-0.755835	1.69687	1.69683	11.3863
2.90795		0.937063	0.85015	0.861139	0.000999001	0.000999001	0.002997		-1.18646	2.23054	-0.508327	1.29982	-0.783343	1.68794	1.90535	11.3897
2.97071		0.965035	0.928072	0.848152	0.000999001	0.000999001	0.002997		-1.21734	2.05551	-0.50837	1.37593	-0.706905	1.7369	2.07272	11.3873
3.03347		0.995005	0.987013	0.984016	0.000999001	0.000999001	0.001998		-1.39063	2.05563	-0.507839	1.32117	-0.660434	1.78519	2.12434	11.4003
3.09623		0.924076	0.95005	0.832168	0.000999001	0.000999001	0.001998		-1.36101	1.95441	-0.512465	1.2362	-0.583342	1.766	2.10496	11.5738
3.159		0.929071	0.867133	0.722278	0.000999001	0.000999001	0.001998		-1.2656	1.75234	-0.511196	1.18744	-0.551833	1.71007	2.1009	11.6873
3.22176		0.994006	0.818182	0.727273	0.000999001	0.000999001	0.002997		-1.10629	1.58021	-0.521767	1.10585	-0.555609	1.66176	2.03594	11.7371
3.28452		0.973027	0.85015	0.797203	0.000999001	0.000999001	0.002997		-0.94881	1.56962	-0.494022	1.11105	-0.58054	1.64757	1.94032	11.6235
3.34728		0.911089	0.994006	0.873127	0.000999001	0.000999001	0.002997		-0.784907	1.65805	-0.41556	1.12804	-0.584428	1.66266	1.93369	11.4432
3.41004		0.815185	0.881119	0.963037	0.000999001	0.000999001	0.002997		-0.873487	1.84957	-0.351387	1.12259	-0.614546	1.63254	2.10521	11.3957
3.4728		0.959041	0.882118	0.874126	0.000999001	0.000999001	0.001998		-1.03519	1.94451	-0.285491	1.17652	-0.637243	1.57061	2.2897	11.5165
3.53556		0.665335	0.94006	0.657343	0.000999001	0.000999001	0.001998		-1.30795	1.75802	-0.183949	1.19314	-0.712478	1.43961	2.35372	11.6175
3.59833		0.295704	0.69031	0.476523	0.000999001	0.000999001	0.001998		-1.39226	1.35109	-0.123134	1.27739	-0.795308	1.4068	2.34475	11.5104
3.66109		0.185814	0.597403	0.375624	0.000999001	0.000999001	0.000999001		-1.61914	1.1685	-0.150528	1.33691	-0.92074	1.2747	2.29772	11.4454
3.72385		0.217782	0.621379	0.392607	0.000999001	0.000999001	0.000999001		-1.70789	1.21564	-0.227177	1.30561	-0.935528	1.31915	2.33777	11.5043
3.78661		0.296703	0.666334	0.446553	0.000999001	0.000999001	0.000999001		-1.74909	1.43138	-0.299255	1.22301	-0.886434	1.23253	2.247	11.58
3.84937		0.316683	0.581419	0.555445	0.000999001	0.000999001	0.000999001		-1.63714	1.55644	-0.311459	1.2273	-0.759207	1.25176	2.31633	11.4007
3.91213		0.243756	0.362637	0.723277	0.000999001	0.000999001	0.000999001		-1.69175	1.35639	-0.291078	1.30162	-0.65939	1.34155	2.44268	11.2833
3.9749		0.161838	0.193806	0.869131	0.000999001	0.000999001	0.000999001		-1.70617	0.952625	-0.271337	1.36262	-0.544525	1.55972	2.5423	11.1061
4.03766		0.120879	0.15984	0.931069	0.000999001	0.000999001	0.000999001		-1.7002	0.590085	-0.316641	1.36659	-0.542154	1.66672	2.50414	10.9414
4.10042		0.106893	0.176823	0.883117	0.000999001	0.000999001	0.000999001		-1.82619	0.535482	-0.385554	1.34585	-0.581817	1.5368	2.37931	10.8023
4.16318		0.105894	0.167832	0.819181	0.000999001	0.000999001	0.000999001		-2.01386	0.617741	-0.461388	1.31126	-0.622937	1.36649	2.18286	10.7876
4.22594		0.102897	0.124875	0.803197	0.000999001	0.000999001	0.000999001		-2.17097	0.716393	-0.479114	1.30256	-0.672078	1.269	1.85214	10.8119
4.2887		0.108891	0.111888	0.863137	0.000999001	0.000999001	0.001998		-2.19504	0.705376	-0.504096	1.33159	-0.655755	1.30957	1.64176	10.7892
4.35146		0.17982	0.172827	0.946054	0.000999001	0.000999001	0.000999001		-1.93953	0.858089	-0.49626	1.3745	-0.653302	1.38365	1.64149	10.7322
4.41423		0.356643	0.403596	0.952048	0.000999001	0.000999001	0.000999001		-1.75655	1.08643	-0.492082	1.39494	-0.734461	1.48009	1.77947	10.897
4.47699		0.572428	0.705295	0.879121	0.000999001	0.000999001	0.000999001		-1.58783	1.38306	-0.559756	1.33857	-0.879746	1.38961	1.93837	11.1133
4.53975		0.618382	0.834166	0.759241	0.000999001	0.000999001	0.000999001		-1.55312	1.44251	-0.6243	1.30773	-0.917323	1.20211	2.09344	11.1735
4.60251		0.42957	0.67033	0.661339	0.000999001	0.000999001	0.000999001		-1.7512	1.30893	-0.617074	1.3	-0.927704	1.1225	2.01086	11.0038
4.66527		0.253746	0.431568	0.617383	0.000999001	0.000999001	0.001998		-1.90899	1.22702	-0.516898	1.33116	-0.80242	1.16348	1.88481	10.6907
4.72803		0.168831	0.310689	0.559441	0.000999001	0.000999001	0.001998		-2.0764	1.14038	-0.440341	1.32984	-0.813031	1.16739	1.55766	10.4426
4.79079		0.144855	0.353646	0.452547	0.000999001	0.000999001	0.001998		-2.13724	1.00657	-0.409847	1.34106	-0.873431	1.05981	1.38976	10.2461
4.85356		0.14985	0.5005	0.318681	0.000999001	0.000999001	0.001998		-2.07156	1.05522	-0.469349	1.32857	-1.04093	0.960279	1.28422	10.1947
4.91632		0.195804	0.711289	0.222777	0.000999001	0.000999001	0.002997		-1.98489	1.19605	-0.520014	1.25012	-1.23777	0.805462	1.23485	10.2979
4.97908		0.312687	0.991009	0.168831	0.000999001	0.000999001	0.004995		-1.8563	1.27587	-0.505436	1.2288	-1.37116	0.66458	1.34874	10.3067
5.04184		0.522478	0.689311	0.160839	0.000999001	0.000999001	0.00599401		-1.74561	1.38433	-0.557898	1.25301	-1.38407	0.649157	1.36661	10.2827
5.1046		0.76024	0.460539	0.165834	0.000999001	0.000999001	0.00799201		-1.57423	1.51674	-0.598778	1.22768	-1.36605	0.685445	1.4311	10.2405
5.16736		0.871129	0.443556	0.180819	0.000999001	0.000999001	0.004995		-1.68899	1.4957	-0.658996	1.0887	-1.37712	0.684591	1.54653	10.0999
5.23013		0.677323	0.632368	0.208791	0.000999001	0.000999001	0.001998		-1.97765	1.11666	-0.673791	0.971638	-1.4026	0.667019	1.51602	10.0146
5.29289		0.37962	0.999001	0.243756	0.000999001	0.000999001	0.000999001		-2.22283	0.780617	-0.677346	0.971733	-1.39892	0.697383	1.47129	9.92445
5.35565		0.214785	0.741259	0.25974	0.000999001	0.000999001	0.000999001		-2.45956	0.671474	-0.727335	1.00537	-1.34128	0.705627	1.41152	9.95114
5.41841		0.22977	0.774226	0.246753	0.000999001	0.000999001	0.000999001		-2.4605	0.90298	-0.692537	1.12034	-1.30452	0.906642	1.31919	10.214
5.48117		0.367632	0.964036	0.206793	0.000999001	0.000999001	0.002997		-2.19705	1.0762	-0.615305	1.14117	-1.31351	0.892613	1.30992	10.662
5.54393		0.488511	0.754246	0.156843	0.000999001	0.000999001	0.00699301		-1.96233	1.18624	-0.524027	1.1939	-1.33592	0.879616	1.36644	11.0468
5.60669		0.486513	0.689311	0.112887	0.000999001	0.000999001	0.00699301		-1.81762	1.22707	-0.467498	1.20128	-1.34152	0.791525	1.34849	11.0584
5.66946		0.370629	0.76024	0.0819181	0.000999001	0.000999001	0.004995		-1.91694	1.27395	-0.446886	1.17317	-1.37555	0.651707	1.28856	10.6888
5.73222		0.27972	0.843157	0.0549451	0.000999001	0.000999001	0.004995		-2.16422	1.49833	-0.442264	1.23606	-1.38849	0.526827	1.2504	10.3599
5.79498		0.244755	0.847153	0.0519481	0.000999001	0.000999001	0.003996		-2.22014	1.60088	-0.480301	1.27423	-1.38648	0.476363	1.26026	10.334
5.85774		0.260739	0.863137	0.0509491	0.000999001	0.000999001	0.001998		-2.19067	1.60702	-0.531687	1.30798	-1.38028	0.505763	1.36751	10.648
5.9205		0.264735	0.959041	0.0749251	0.000999001	0.000999001	0.001998		-2.13557	1.35417	-0.545275	1.25554	-1.28952	0.684261	1.47056	11.0533
5.98326		0.223776	0.905095	0.11988	0.000999001	0.000999001	0.002997		-2.11739	1.2153	-0.472349	1.19867	-1.23353	0.783771	1.39276	11.2746
6.04603		0.212787	0.827173	0.137862	0.000999001	0.000999001	0.004995		-2.06421	1.11238	-0.40355	1.21112	-1.17825	0.764794	1.29982	11.158
6.10879		0.247752	0.898102	0.13986	0.000999001	0.000999001	0.00799201		-1.84973	1.09525	-0.366235	1.22879	-1.19087	0.762066	1.18221	10.8404
6.17155		0.328671	0.968032	0.156843	0.000999001	0.000999001	0.00799201		-1.50601	0.972321	-0.378586	1.20686	-1.17901	0.753866	1.06093	10.5987
6.23431		0.34965	0.995005	0.20979	0.000999001	0.000999001	0.00799201		-1.21041	0.83837	-0.444939	1.16354	-1.05475	0.717524	1.03455	10.5994
6.29707		0.263736	0.768232	0.276723	0.000999001	0.000999001	0.003996		-1.17716	0.631487	-0.496967	1.07308	-0.994492	0.735473	1.03779	10.7867
6.35983		0.181818	0.543457	0.294705	0.000999001	0.000999001	0.003996		-1.59679	0.544235	-0.519635	1.04894	-1.00351	0.774308	1.01734	10.9811
6.42259		0.13986	0.505495	0.238761	0.000999001	0.000999001	0.003996		-1.73648	0.563351	-0.474316	1.05374	-1.09999	0.708839	1.02568	11.0215
6.48536		0.13986	0.621379	0.173826	0.000999001	0.000999001	0.004995		-1.68134	0.619512	-0.480894	1.0467	-1.20814	0.633052	1.09578	11.0117
6.54812		0.156843	0.727273	0.144855	0.000999001	0.000999001	0.003996		-1.68254	0.75447	-0.477159	1.03143	-1.15764	0.635827	1.14956	10.91
6.61088		0.158841	0.604396	0.200799	0.000999001	0.000999001	0.003996		-1.68726	0.761556	-0.436938	1.03142	-1.06029	0.739813	1.12272	10.7778
6.67364		0.103896	0.393606	0.291708	0.000999001	0.000999001	0.004995		-1.82814	0.563124	-0.356077	1.09739	-0.968875	0.882114	0.938906	10.7011
6.7364		0.0679321	0.307692	0.268731	0.000999001	0.000999001	0.004995		-1.8934	0.619071	-0.285997	1.1778	-0.969021	0.973869	0.752556	10.708
6.79916		0.0609391	0.41958	0.185814	0.000999001	0.000999001	0.00599401		-1.90088	0.590673	-0.281488	1.24374	-0.996765	0.921221	0.887414	10.4985
6.86192		0.11988	0.598402	0.12987	0.000999001	0.000999001	0.003996		-1.94693	0.778683	-0.29754	1.261	-1.07514	0.778868	1.1427	10.3935
6.92469		0.192807	0.741259	0.145854	0.000999001	0.000999001	0.002997		-1.76188	0.901823	-0.389877	1.28029	-1.06247	0.734412	1.40766	10.2835
6.98745		0.237762	0.667333	0.241758	0.000999001	0.000999001	0.001998		-1.54647	1.01284	-0.489721	1.34952	-0.934916	0.791555	1.4076	10.2341
7.05021		0.20979	0.51049	0.314685	0.000999001	0.000999001	0.002997		-1.58073	0.981334	-0.489629	1.37018	-0.80008	0.893569	1.15187	10.093
7.11297		0.174825	0.446553	0.274725	0.000999001	0.000999001	0.00599401		-1.73406	1.09559	-0.490809	1.37993	-0.768417	0.923605	0.870496	9.87957
7.17573		0.140859	0.577423	0.154845	0.000999001	0.000999001	0.00899101		-1.87467	1.17502	-0.401329	1.34278	-0.914802	0.96699	0.748876	9.70653
7.23849		0.151848	0.766234	0.10989	0.000999001	0.000999001	0.00799201		-1.83558	1.10436	-0.36624	1.37178	-1.13185	0.889292	0.87112	9.68875
7.30126		0.177822	0.772228	0.133866	0.000999001	0.000999001	0.00699301		-1.76386	1.01809	-0.43063	1.36257	-1.22155	0.867862	1.00332	9.82241
7.36402		0.21978	0.672328	0.255744	0.000999001	0.000999001	0.00599401		-1.74041	0.953636	-0.520939	1.32156	-1.15688	0.99015	1.0134	9.85562
7.42678		0.25974	0.612388	0.400599	0.000999001	0.000999001	0.00799201		-1.76504	0.898299	-0.666716	1.24442	-1.07153	1.0534	0.826432	9.86489
7.48954		0.360639	0.737263	0.450549	0.000999001	0.000999001	0.010989		-1.71856	0.960065	-0.747339	1.19786	-1.11611	0.96717	0.581213	9.76093
7.5523		0.526474	0.982018	0.394605	0.001998	0.001998	0.020979		-1.50792	0.98245	-0.84689	1.16109	-1.28942	0.867054	0.504389	9.61173
7.61506		0.672328	0.828172	0.365634	0.000999001	0.000999001	0.018981		-1.28823	1.08067	-0.920621	1.07823	-1.43608	0.820583	0.545466	9.52367
7.67782		0.774226	0.779221	0.420579	0.000999001	0.000999001	0.017982		-1.15274	1.1445	-0.916614	1.03093	-1.478	0.909702	0.536555	9.56252
7.74059		0.845155	0.796204	0.545455	0.000999001	0.000999001	0.015984		-1.08041	1.27238	-0.870805	1.0489	-1.38253	1.07752	0.76318	9.66216
7.80335		0.988012	0.757243	0.648352	0.000999001	0.000999001	0.015984		-0.977691	1.48864	-0.774005	1.008	-1.31514	1.1193	0.875155	9.70294
7.86611		0.756244	0.577423	0.655345	0.000999001	0.000999001	0.020979		-1.0763	1.7372	-0.826397	0.987817	-1.34218	1.12816	0.761942	9.69637
7.92887		0.592408	0.420579	0.65035	0.000999001	0.000999001	0.026973		-1.05889	1.63476	-0.866467	0.92886	-1.32877	1.04229	0.771729	9.60143
7.99163		0.601399	0.428571	0.698302	0.000999001	0.000999001	0.030969		-1.0047	1.47948	-0.994848	0.898067	-1.20688	1.03177	0.788841	9.46746
8.05439		0.843157	0.715285	0.816184	0.000999001	0.000999001	0.024975		-0.939314	1.23577	-0.988053	0.928144	-1.08069	1.04274	0.797582	9.38204
8.11715		0.795205	0.894106	0.883117	0.000999001	0.000999001	0.014985		-1.0914	1.02724	-0.922987	0.973841	-1.03381	1.12229	0.783252	9.42839
8.17992		0.527473	0.656344	0.836164	0.000999001	0.000999001	0.00999001		-1.34167	0.898505	-0.867469	1.00989	-1.03971	1.16373	0.791224	9.62613
8.24268		0.468531	0.697303	0.738262	0.000999001	0.000999001	0.004995		-1.51213	1.1245	-0.812135	1.08135	-1.11671	1.14849	0.954304	9.85547
8.30544		0.539461	0.82018	0.69031	0.000999001	0.000999001	0.004995		-1.5227	1.34362	-0.798654	1.1507	-1.15034	1.12951	1.01641	9.95426
8.3682		0.628372	0.828172	0.776224	0.000999001	0.000999001	0.00699301		-1.3798	1.51243	-0.770101	1.1303	-1.1093	1.22798	1.04785	9.96926
8.43096		0.603397	0.645355	0.983017	0.000999001	0.000999001	0.00899101		-1.23142	1.23885	-0.764356	1.12048	-0.97062	1.38699	0.972781	9.81428
8.49372		0.48951	0.443556	0.82018	0.000999001	0.001998	0.003996		-1.25045	0.897179	-0.721458	1.13398	-0.842483	1.54098	0.877895	9.62862
8.55649		0.402597	0.35964	0.798202	0.000999001	0.001998	0.003996		-1.39225	0.757226	-0.71729	1.13205	-0.863907	1.52541	0.744691	9.52762
8.61925		0.397602	0.418581	0.89011	0.000999001	0.001998	0.00599401		-1.41176	0.762531	-0.732847	1.12283	-0.949386	1.51088	0.71301	9.61316
8.68201		0.52048	0.585415	0.983017	0.000999001	0.002997	0.013986		-1.41653	1.1303	-0.758209	1.1276	-0.950476	1.38985	0.632934	9.82252
8.74477		0.725275	0.745255	0.985015	0.001998	0.002997	0.025974		-1.3493	1.50436	-0.792459	1.11162	-0.858917	1.47948	0.455827	9.85995
8.80753		0.846154	0.77023	0.901099	0.001998	0.00599401	0.032967		-1.2666	1.59064	-0.850997	1.02432	-0.785168	1.42573	0.297526	9.80209
8.87029		0.782218	0.673327	0.822178	0.001998	0.00699301	0.028971		-1.29662	1.20011	-0.911815	0.962518	-0.786136	1.46403	0.231844	9.61879
8.93305		0.624376	0.528472	0.818182	0.000999001	0.004995	0.016983		-1.39212	1.05927	-0.941468	0.984366	-0.841696	1.47623	0.314538	9.53532
8.99582		0.483516	0.457542	0.847153	0.000999001	0.002997	0.00999001		-1.53992	0.965326	-0.898352	0.995022	-0.865412	1.52531	0.514396	9.61043
9.05858		0.483516	0.475524	0.846154	0.000999001	0.003996	0.00999001		-1.58732	1.03181	-0.806605	1.083	-0.842174	1.66284	0.682946	9.70142
9.12134		0.604396	0.594406	0.813187	0.001998	0.002997	0.014985		-1.51242	1.3449	-0.756439	1.12451	-0.865912	1.80178	0.728587	9.69229
9.1841		0.769231	0.718282	0.826174	0.001998	0.002997	0.01998		-1.45198	1.6292	-0.768324	1.14265	-0.861432	1.89205	0.688498	9.62249
9.24686		0.709291	0.742258	0.961039	0.001998	0.002997	0.017982		-1.51994	1.53402	-0.752599	1.07879	-0.919109	1.74012	0.605612	9.61908
9.30962		0.465534	0.686314	0.827173	0.000999001	0.001998	0.012987		-1.66793	1.18663	-0.713492	1.05111	-1.04565	1.60991	0.535377	9.69932
9.37238		0.258741	0.584416	0.642358	0.001998	0.001998	0.00899101		-1.77207	0.919759	-0.613533	1.09615	-1.2171	1.51412	0.49652	9.73614
9.43515		0.226773	0.6004	0.557443	0.001998	0.001998	0.00999001		-1.80664	0.866734	-0.512361	1.18544	-1.29357	1.46839	0.410685	9.51657
9.49791		0.356643	0.783217	0.544456	0.002997	0.002997	0.01998		-1.67244	1.2069	-0.464142	1.29576	-1.26657	1.47771	0.245029	9.05715
9.56067		0.664336	0.981019	0.558442	0.002997	0.003996	0.046953		-1.48821	1.60879	-0.525856	1.33939	-1.25347	1.5785	0.107774	8.60677
9.62343		0.865135	0.841159	0.564436	0.002997	0.00699301	0.0769231		-1.3973	1.85813	-0.555352	1.26783	-1.21529	1.52358	0.0532206	8.44642
9.68619		0.766234	0.941059	0.596404	0.002997	0.00699301	0.0629371		-1.47885	1.70449	-0.609779	1.24433	-1.2022	1.50768	0.0821526	8.62702
9.74895		0.490509	0.764236	0.729271	0.002997	0.00599401	0.02997		-1.72734	1.30279	-0.607118	1.17978	-1.12332	1.53469	0.165427	8.70785
9.81172		0.294705	0.423576	0.987013	0.001998	0.003996	0.016983		-1.84058	0.950085	-0.654156	1.03068	-1.00416	1.5136	0.226576	8.67651
9.87448		0.315684	0.312687	0.737263	0.001998	0.003996	0.013986		-1.8781	0.899282	-0.720298	0.952924	-0.906884	1.55304	0.310993	8.63212
9.93724		0.46953	0.420579	0.726274	0.001998	0.003996	0.014985		-1.71622	1.11073	-0.749621	0.955579	-0.969578	1.53622	0.355572	8.62686
10		0.673327	0.706294	0.981019	0.001998	0.002997	0.021978		-1.50141	1.34018	-0.692485	0.99625	-1.04337	1.46845	0.332498	8.67103

## Sheet: S2C
Tests (Exp. 2 - AI Photom group)		Test 1											Test 2
		Permutation Tests				Bootstrap tests							Permutation Tests				Bootstrap tests
Time		REW-AC	REW-INAC	AC-INAC		REW		AC		INAC			REW-AC	REW-INAC	AC-INAC		REW		AC		INAC
-5		0.408591	0.909091	0.502498		-0.504413	0.561413	-0.149952	0.644871	-0.61092	0.765423		0.685315	0.685315	0.5005		-0.388433	0.476551	-0.295987	0.576186	-0.687727	0.488842
-4.93724		0.314685	0.853147	0.447552		-0.505544	0.536609	-0.167967	0.602315	-0.516094	0.728629		0.676324	0.676324	0.627373		-0.410633	0.463826	-0.320627	0.559116	-0.649716	0.527369
-4.87448		0.277722	0.651349	0.62038		-0.536668	0.567638	-0.194235	0.593846	-0.496787	0.707233		0.866134	0.866134	0.44955		-0.423188	0.490095	-0.334258	0.484195	-0.7043	0.485404
-4.81172		0.253746	0.486513	0.804196		-0.611478	0.518928	-0.169926	0.522532	-0.467775	0.691028		0.95005	0.95005	0.274725		-0.431948	0.50536	-0.300284	0.463464	-0.706925	0.38591
-4.74895		0.256743	0.553447	0.699301		-0.652247	0.49333	-0.224134	0.512967	-0.473258	0.606838		0.752248	0.752248	0.324675		-0.415078	0.465667	-0.266258	0.458716	-0.642788	0.373062
-4.68619		0.341658	0.983017	0.366633		-0.569072	0.467952	-0.275788	0.479925	-0.571138	0.488861		0.365634	0.365634	0.773227		-0.418351	0.36448	-0.220766	0.47411	-0.540202	0.404947
-4.62343		0.544456	0.561439	0.220779		-0.457952	0.471776	-0.296785	0.479522	-0.642855	0.381505		0.167832	0.167832	0.518482		-0.452251	0.300991	-0.194932	0.483618	-0.460651	0.504745
-4.56067		0.693307	0.446553	0.245754		-0.391667	0.47383	-0.279809	0.455248	-0.674288	0.342187		0.140859	0.140859	0.276723		-0.477537	0.337646	-0.190895	0.49268	-0.432139	0.688619
-4.49791		0.558442	0.847153	0.402597		-0.48291	0.437627	-0.236393	0.431051	-0.535261	0.399343		0.24975	0.24975	0.401598		-0.444877	0.40416	-0.203218	0.486867	-0.381281	0.670636
-4.43515		0.24975	0.538462	0.646354		-0.572996	0.348802	-0.182799	0.423225	-0.435041	0.541555		0.5005	0.5005	0.858142		-0.404198	0.473208	-0.20907	0.496846	-0.412915	0.57187
-4.37238		0.112887	0.26973	0.731269		-0.626656	0.295182	-0.196721	0.420117	-0.379379	0.505951		0.665335	0.665335	0.665335		-0.363516	0.526968	-0.182731	0.492339	-0.426466	0.445153
-4.30962		0.132867	0.330669	0.685315		-0.625453	0.252402	-0.284233	0.405046	-0.446207	0.440038		0.596404	0.596404	0.460539		-0.348286	0.525199	-0.171459	0.461421	-0.465426	0.373887
-4.24686		0.285714	0.51049	0.753247		-0.611111	0.249534	-0.329516	0.364476	-0.518461	0.442964		0.397602	0.397602	0.484515		-0.4222	0.479864	-0.146123	0.431376	-0.498718	0.314952
-4.1841		0.460539	0.472527	0.947053		-0.558821	0.2285	-0.362431	0.275207	-0.474003	0.431288		0.287712	0.287712	0.554446		-0.457991	0.408214	-0.127226	0.40792	-0.520818	0.28008
-4.12134		0.453546	0.221778	0.532468		-0.587101	0.197836	-0.379464	0.225979	-0.412947	0.466822		0.363636	0.363636	0.526474		-0.41281	0.43185	-0.133421	0.431336	-0.497762	0.290659
-4.05858		0.295704	0.115884	0.431568		-0.699495	0.167609	-0.371246	0.235984	-0.432513	0.590816		0.658342	0.658342	0.435564		-0.341256	0.510592	-0.130423	0.426743	-0.501179	0.375886
-3.99582		0.127872	0.141858	0.744256		-0.74775	0.166312	-0.327035	0.264532	-0.521302	0.552687		0.927073	0.927073	0.457542		-0.303385	0.530813	-0.167595	0.377164	-0.50317	0.435934
-3.93305		0.04995	0.26973	0.521479		-0.729851	0.164477	-0.25012	0.3246	-0.611954	0.362134		0.785215	0.785215	0.644356		-0.33863	0.435759	-0.198508	0.331078	-0.548563	0.466919
-3.87029		0.016983	0.498501	0.0929071		-0.72699	0.122219	-0.186649	0.417095	-0.635514	0.225036		0.385614	0.385614	0.898102		-0.498654	0.305661	-0.234917	0.288794	-0.639988	0.378018
-3.80753		0.00999001	0.552448	0.030969		-0.718545	0.113981	-0.142219	0.480821	-0.643668	0.228516		0.153846	0.153846	0.82018		-0.617873	0.15084	-0.258757	0.238437	-0.672273	0.345499
-3.74477		0.00999001	0.421578	0.047952		-0.692926	0.120991	-0.144257	0.533192	-0.578411	0.274857		0.111888	0.111888	0.552448		-0.580254	0.131655	-0.268385	0.251294	-0.561924	0.377755
-3.68201		0.020979	0.338661	0.156843		-0.713576	0.133254	-0.192564	0.522649	-0.504414	0.27113		0.156843	0.156843	0.330669		-0.56955	0.193943	-0.268309	0.279863	-0.454529	0.470951
-3.61925		0.10989	0.442557	0.404595		-0.626721	0.206732	-0.236556	0.388202	-0.472112	0.298904		0.231768	0.231768	0.175824		-0.584728	0.237709	-0.29174	0.298087	-0.337689	0.548085
-3.55649		0.435564	0.655345	0.777223		-0.546178	0.355928	-0.287495	0.324747	-0.425373	0.367443		0.194805	0.194805	0.0809191		-0.58112	0.164534	-0.321297	0.298511	-0.292896	0.540794
-3.49372		0.755245	0.712288	0.898102		-0.501334	0.433419	-0.279379	0.285772	-0.377407	0.444911		0.142857	0.142857	0.0729271		-0.604725	0.0679413	-0.331634	0.270016	-0.36031	0.443339
-3.43096		0.575425	0.572428	0.861139		-0.521519	0.391848	-0.253822	0.296656	-0.418217	0.502485		0.227772	0.227772	0.223776		-0.628099	0.169107	-0.365897	0.259577	-0.426141	0.35633
-3.3682		0.361638	0.472527	0.995005		-0.549957	0.341858	-0.269583	0.339426	-0.464352	0.51484		0.663337	0.663337	0.614386		-0.544349	0.280422	-0.360095	0.252244	-0.4021	0.348847
-3.30544		0.364635	0.576424	0.838162		-0.581225	0.397938	-0.295587	0.357265	-0.512403	0.484184		0.595405	0.595405	0.968032		-0.379985	0.445492	-0.326978	0.258032	-0.343339	0.423834
-3.24268		0.69031	0.938062	0.777223		-0.52485	0.429033	-0.29841	0.325475	-0.534909	0.417818		0.253746	0.253746	0.853147		-0.264126	0.506896	-0.348621	0.230601	-0.322638	0.509432
-3.17992		0.685315	0.542458	0.818182		-0.36871	0.455221	-0.338637	0.32927	-0.554609	0.411071		0.304695	0.304695	0.826174		-0.260191	0.47519	-0.337158	0.236951	-0.358761	0.480004
-3.11715		0.257742	0.188811	0.881119		-0.167399	0.518522	-0.342644	0.316886	-0.500971	0.403422		0.551449	0.551449	0.668332		-0.350296	0.430445	-0.317942	0.248883	-0.43697	0.395498
-3.05439		0.126873	0.10989	0.895105		-0.0675617	0.63667	-0.325873	0.3359	-0.470318	0.446268		0.714286	0.714286	0.376623		-0.367391	0.429244	-0.310363	0.244273	-0.535534	0.294565
-2.99163		0.0649351	0.0839161	0.891109		-0.0835646	0.745547	-0.290503	0.319668	-0.448434	0.486065		0.523477	0.523477	0.21978		-0.30745	0.539888	-0.285768	0.260932	-0.556357	0.260722
-2.92887		0.030969	0.0889111	0.966034		-0.117929	0.804029	-0.3125	0.312345	-0.48789	0.480585		0.296703	0.296703	0.233766		-0.246655	0.578468	-0.306224	0.28903	-0.516029	0.330155
-2.86611		0.021978	0.123876	0.688312		-0.162447	0.870695	-0.352495	0.289916	-0.483927	0.506058		0.236763	0.236763	0.368631		-0.218972	0.535581	-0.308715	0.287011	-0.477676	0.419144
-2.80335		0.022977	0.21978	0.41958		-0.214482	0.856693	-0.38222	0.251199	-0.40561	0.552826		0.313686	0.313686	0.611389		-0.244307	0.506076	-0.31845	0.261025	-0.428209	0.454015
-2.74059		0.042957	0.365634	0.312687		-0.235709	0.739209	-0.354035	0.21614	-0.335781	0.554682		0.351648	0.351648	0.698302		-0.293392	0.511724	-0.330973	0.26208	-0.439043	0.501523
-2.67782		0.0889111	0.397602	0.418581		-0.248535	0.650278	-0.377585	0.216245	-0.352585	0.482589		0.21978	0.21978	0.633367		-0.262387	0.553078	-0.361963	0.228851	-0.449251	0.569035
-2.61506		0.0829171	0.266733	0.567433		-0.278922	0.671605	-0.409002	0.188141	-0.407497	0.349127		0.122877	0.122877	0.716284		-0.259796	0.609	-0.41525	0.204497	-0.443591	0.639787
-2.5523		0.0519481	0.237762	0.511489		-0.373721	0.720508	-0.483961	0.104759	-0.466741	0.327179		0.150849	0.150849	0.924076		-0.344133	0.591556	-0.472924	0.174706	-0.429538	0.693931
-2.48954		0.036963	0.344655	0.272727		-0.442851	0.758049	-0.534022	0.050262	-0.498026	0.38409		0.402597	0.402597	0.431568		-0.497285	0.432001	-0.505049	0.106541	-0.420142	0.74523
-2.42678		0.028971	0.6004	0.132867		-0.431434	0.709298	-0.576843	0.0549389	-0.396386	0.488902		0.867133	0.867133	0.220779		-0.629715	0.301513	-0.470689	0.0835163	-0.416731	0.757423
-2.36402		0.03996	0.837163	0.104895		-0.314508	0.641015	-0.550604	0.113195	-0.394852	0.627617		0.962038	0.962038	0.234765		-0.638941	0.295445	-0.474588	0.119827	-0.492882	0.734264
-2.30126		0.0629371	0.799201	0.153846		-0.285855	0.727219	-0.526495	0.18271	-0.437939	0.682137		0.561439	0.561439	0.428571		-0.509702	0.380407	-0.460809	0.13098	-0.508326	0.700399
-2.23849		0.0909091	0.665335	0.247752		-0.338044	0.771319	-0.510365	0.19769	-0.48157	0.67445		0.161838	0.161838	0.72028		-0.408169	0.559723	-0.510429	0.138459	-0.447125	0.712439
-2.17573		0.0869131	0.658342	0.257742		-0.353965	0.756963	-0.537237	0.178558	-0.496073	0.663794		0.0649351	0.0649351	0.841159		-0.391716	0.685586	-0.56765	0.132428	-0.478478	0.790559
-2.11297		0.100899	0.887113	0.14985		-0.47488	0.704066	-0.565494	0.120584	-0.509299	0.727163		0.0609391	0.0609391	0.839161		-0.429524	0.733191	-0.598746	0.150612	-0.451271	0.778136
-2.05021		0.105894	0.827173	0.0649351		-0.531216	0.642814	-0.621723	0.110348	-0.503588	0.802316		0.115884	0.115884	0.916084		-0.507764	0.723545	-0.61861	0.134016	-0.534723	0.735375
-1.98745		0.104895	0.775225	0.0549451		-0.534786	0.683271	-0.620169	0.0906272	-0.479632	0.864794		0.228771	0.228771	0.842158		-0.542726	0.677262	-0.626687	0.163571	-0.664881	0.727048
-1.92469		0.0899101	0.957043	0.101898		-0.507142	0.785118	-0.626631	0.141901	-0.527292	0.906041		0.353646	0.353646	0.715285		-0.563526	0.641742	-0.583337	0.235605	-0.780525	0.753457
-1.86192		0.0929071	0.816184	0.218781		-0.512158	0.907396	-0.590378	0.207637	-0.597364	0.927296		0.591409	0.591409	0.861139		-0.620306	0.725741	-0.575129	0.351634	-0.782588	0.801829
-1.79916		0.140859	0.758242	0.316683		-0.535547	1.01627	-0.589945	0.25626	-0.682484	0.952915		0.92008	0.92008	0.829171		-0.714909	0.727841	-0.51126	0.433209	-0.638475	0.758821
-1.7364		0.166833	0.788212	0.32967		-0.536424	1.02741	-0.601985	0.267589	-0.724467	0.985209		0.822178	0.822178	0.589411		-0.771255	0.718436	-0.460547	0.509146	-0.553094	0.786501
-1.67364		0.15984	0.781219	0.307692		-0.59041	1.03515	-0.639156	0.252063	-0.753725	0.990736		0.741259	0.741259	0.638362		-0.803047	0.714669	-0.466932	0.524764	-0.626195	0.811993
-1.61088		0.118881	0.691309	0.270729		-0.537179	1.03699	-0.670879	0.249434	-0.762256	0.986945		0.811189	0.811189	0.891109		-0.757701	0.804181	-0.460439	0.566846	-0.72486	0.79774
-1.54812		0.0739261	0.629371	0.225774		-0.472731	1.14742	-0.660947	0.311383	-0.703301	1.00553		0.884116	0.884116	0.884116		-0.819163	0.905372	-0.48288	0.560695	-0.846793	0.817114
-1.48536		0.0659341	0.714286	0.174825		-0.452511	1.21616	-0.610284	0.351514	-0.610441	1.06168		0.862138	0.862138	0.945055		-0.840893	0.959727	-0.488632	0.630408	-0.897958	0.884325
-1.42259		0.0919081	0.898102	0.133866		-0.443665	1.25212	-0.577976	0.349451	-0.53665	1.17941		0.763237	0.763237	0.825175		-0.930114	0.971563	-0.45053	0.690783	-0.861403	1.00357
-1.35983		0.0999001	0.963037	0.122877		-0.51952	1.22442	-0.640535	0.335364	-0.530719	1.20046		0.639361	0.639361	0.583417		-0.943058	1.00877	-0.372312	0.729106	-0.772251	1.15397
-1.29707		0.0889111	0.789211	0.194805		-0.483224	1.18174	-0.681503	0.319615	-0.638278	1.14451		0.539461	0.539461	0.467532		-0.977738	0.976471	-0.335793	0.777729	-0.666889	1.22297
-1.23431		0.0769231	0.503497	0.402597		-0.385338	1.28569	-0.631164	0.390714	-0.763476	1.15014		0.486513	0.486513	0.5005		-1.04682	0.930517	-0.3411	0.807048	-0.668127	1.18563
-1.17155		0.0859141	0.33966	0.729271		-0.263957	1.39643	-0.569094	0.519431	-0.810451	1.18745		0.528472	0.528472	0.602398		-1.03193	0.979314	-0.364136	0.801062	-0.711936	1.12153
-1.10879		0.170829	0.342657	0.92008		-0.204119	1.45032	-0.460787	0.657427	-0.785585	1.26466		0.74026	0.74026	0.755245		-0.90545	1.16849	-0.411378	0.823798	-0.682268	1.13528
-1.04603		0.342657	0.492507	0.945055		-0.28869	1.38558	-0.373798	0.775704	-0.750054	1.42763		0.841159	0.841159	0.941059		-0.757379	1.46749	-0.428562	0.775981	-0.629251	1.21973
-0.983264		0.528472	0.68032	0.925075		-0.401796	1.35725	-0.390265	0.8179	-0.779844	1.48284		0.424575	0.424575	0.889111		-0.606533	1.75307	-0.449718	0.743319	-0.568967	1.36826
-0.920502		0.603397	0.718282	0.967033		-0.515871	1.39613	-0.415454	0.851179	-0.924646	1.41882		0.225774	0.225774	0.756244		-0.50698	1.90613	-0.452626	0.714251	-0.52389	1.44496
-0.857741		0.566434	0.566434	0.859141		-0.557412	1.42893	-0.413037	0.87754	-1.04766	1.37014		0.203796	0.203796	0.702298		-0.406763	1.96282	-0.427344	0.705112	-0.586473	1.5465
-0.794979		0.508492	0.365634	0.622378		-0.521095	1.48006	-0.399496	0.926131	-1.10706	1.31394		0.275724	0.275724	0.728272		-0.471258	1.90938	-0.394602	0.716047	-0.72931	1.56306
-0.732218		0.480519	0.1998	0.407592		-0.434933	1.55458	-0.376471	0.960558	-1.1662	1.16625		0.351648	0.351648	0.762238		-0.537645	1.94299	-0.408068	0.768305	-0.855605	1.52937
-0.669456		0.413586	0.0899101	0.258741		-0.329779	1.6478	-0.352073	1.08602	-1.16145	0.994073		0.27972	0.27972	0.655345		-0.53934	2.04456	-0.409541	0.819905	-0.907268	1.49204
-0.606695		0.326673	0.024975	0.153846		-0.190266	1.73111	-0.376501	1.14539	-1.26267	0.789434		0.176823	0.176823	0.460539		-0.416303	2.29241	-0.381917	0.869878	-0.864748	1.53464
-0.543933		0.212787	0.00599401	0.102897		-0.0982067	1.84772	-0.398346	1.21656	-1.31941	0.610568		0.117882	0.117882	0.317682		-0.255433	2.53763	-0.365518	0.94268	-0.869763	1.49895
-0.481172		0.144855	0.002997	0.0849151		0.0211318	2.04795	-0.39632	1.24596	-1.2943	0.555539		0.110889	0.110889	0.252747		-0.198269	2.66585	-0.319836	1.02297	-0.919534	1.49502
-0.41841		0.104895	0.001998	0.0709291		0.127077	2.16435	-0.348656	1.30161	-1.21237	0.576054		0.166833	0.166833	0.261738		-0.177209	2.66208	-0.260957	1.10247	-0.946634	1.54383
-0.355649		0.0749251	0.001998	0.0799201		0.204951	2.35405	-0.305481	1.26977	-1.14706	0.675762		0.220779	0.220779	0.276723		-0.177124	2.61544	-0.229217	1.2284	-0.963184	1.64884
-0.292887		0.0509491	0.002997	0.10989		0.195907	2.57721	-0.285411	1.26277	-1.15797	0.828094		0.233766	0.233766	0.263736		-0.14479	2.67623	-0.22048	1.39071	-0.978446	1.63582
-0.230126		0.041958	0.002997	0.151848		0.228521	2.70634	-0.281284	1.25428	-1.15258	0.917986		0.216783	0.216783	0.214785		-0.145013	2.83256	-0.176535	1.47667	-0.978366	1.57892
-0.167364		0.037962	0.001998	0.206793		0.367516	2.71587	-0.212418	1.34971	-1.07158	1.05591		0.22977	0.22977	0.18981		-0.131551	2.94285	-0.126111	1.46663	-1.00315	1.57515
-0.104603		0.046953	0.00699301	0.252747		0.421833	2.71604	-0.134998	1.44475	-0.896664	1.2261		0.330669	0.330669	0.212787		-0.119961	2.9158	-0.0637807	1.4653	-0.957399	1.57471
-0.041841		0.0689311	0.012987	0.324675		0.502213	2.82009	-0.0295621	1.5573	-0.692824	1.40087		0.511489	0.511489	0.282717		-0.164434	2.80189	0.0115316	1.47478	-0.937763	1.57818
0.0209205		0.0949051	0.024975	0.391608		0.595514	2.97877	0.0563955	1.72294	-0.515811	1.58642		0.622378	0.622378	0.331668		-0.152191	2.75965	0.112419	1.53635	-0.841317	1.64836
0.083682		0.141858	0.035964	0.422577		0.66011	3.14276	0.125536	1.9337	-0.409522	1.67138		0.618382	0.618382	0.362637		-0.0248973	2.8682	0.147576	1.65859	-0.618448	1.70515
0.146444		0.232767	0.0519481	0.386613		0.66191	3.22451	0.240213	2.19102	-0.383439	1.84352		0.588412	0.588412	0.405594		0.0687335	3.07891	0.211366	1.83605	-0.40933	1.90543
0.209205		0.423576	0.0889111	0.342657		0.700197	3.2666	0.437538	2.45814	-0.243179	1.95685		0.637363	0.637363	0.517483		0.125553	3.24686	0.305201	2.09571	-0.219552	2.14122
0.271967		0.667333	0.155844	0.331668		0.663105	3.27255	0.571731	2.70074	-0.110236	2.18565		0.776224	0.776224	0.66034		0.144062	3.27242	0.409823	2.33504	-0.0816033	2.43113
0.334728		0.768232	0.222777	0.381618		0.721389	3.24226	0.721876	2.81744	0.0778696	2.27743		0.946054	0.946054	0.797203		0.151436	3.34422	0.555613	2.48334	0.0248508	2.76576
0.39749		0.682318	0.263736	0.498501		0.740163	3.24591	0.736862	2.77521	0.235902	2.39156		1	1	0.849151		0.252848	3.39265	0.641236	2.62018	0.0182014	2.9909
0.460251		0.498501	0.256743	0.692308		0.894289	3.36321	0.653462	2.7037	0.353057	2.50978		0.886114	0.886114	0.766234		0.390605	3.53648	0.682444	2.70771	0.128275	3.01698
0.523013		0.353646	0.272727	0.91009		0.968133	3.47119	0.56536	2.63955	0.441844	2.65003		0.653347	0.653347	0.626374		0.513049	3.83861	0.689401	2.69235	0.184388	3.01946
0.585774		0.282717	0.322677	0.885115		1.00516	3.50086	0.595039	2.64613	0.562411	2.72841		0.453546	0.453546	0.508492		0.649556	4.10178	0.693956	2.69566	0.273358	3.08621
0.648536		0.255744	0.361638	0.823177		1.03415	3.54777	0.643111	2.59039	0.618636	2.7899		0.340659	0.340659	0.414585		0.699683	4.25961	0.724306	2.64011	0.35526	3.07218
0.711297		0.246753	0.346653	0.843157		0.994733	3.56356	0.686656	2.57416	0.573501	2.83268		0.333666	0.333666	0.36963		0.599604	4.32218	0.732951	2.67865	0.222455	3.06454
0.774059		0.227772	0.284715	0.91009		0.994346	3.48295	0.639051	2.49234	0.434371	2.72989		0.391608	0.391608	0.344655		0.484565	4.36839	0.710474	2.69392	0.0638845	3.0125
0.83682		0.211788	0.273726	0.952048		0.958007	3.41325	0.55283	2.43305	0.30044	2.68651		0.493506	0.493506	0.341658		0.42557	4.19018	0.692716	2.70486	-0.015536	2.89511
0.899582		0.235764	0.341658	0.907093		0.867393	3.34883	0.503113	2.3805	0.317811	2.69334		0.555445	0.555445	0.385614		0.464975	4.12488	0.722788	2.70639	0.0092958	2.76922
0.962343		0.281718	0.474525	0.78022		0.841305	3.28517	0.532231	2.35028	0.417007	2.79155		0.562438	0.562438	0.407592		0.498337	4.1892	0.798952	2.69796	0.0423611	2.84182
1.0251		0.318681	0.603397	0.657343		0.833699	3.18345	0.570362	2.39832	0.49169	2.88482		0.504496	0.504496	0.398601		0.542966	4.24521	0.82074	2.69242	0.0993206	2.90846
1.08787		0.320679	0.676324	0.595405		0.813174	3.19957	0.596494	2.38799	0.472675	2.97115		0.476523	0.476523	0.403596		0.518162	4.18527	0.786257	2.60365	0.0831136	2.92428
1.15063		0.307692	0.716284	0.545455		0.783916	3.21262	0.559366	2.35513	0.424685	3.09796		0.553447	0.553447	0.466533		0.429785	3.99926	0.718488	2.56857	0.0846912	2.84869
1.21339		0.318681	0.875125	0.453546		0.794533	3.16602	0.53313	2.28424	0.404954	3.21473		0.675325	0.675325	0.661339		0.269027	3.73362	0.613838	2.52114	0.143339	2.90044
1.27615		0.375624	0.913087	0.344655		0.740416	3.06555	0.471292	2.2374	0.446585	3.35157		0.822178	0.822178	0.984016		0.207602	3.62816	0.518328	2.47462	0.294079	3.09702
1.33891		0.405594	0.701299	0.232767		0.660494	2.86401	0.394827	2.18854	0.482603	3.44635		0.834166	0.834166	0.812188		0.16508	3.56143	0.485938	2.4415	0.42149	3.30357
1.40167		0.397602	0.63037	0.193806		0.584489	2.84364	0.354196	2.20938	0.420541	3.47412		0.751249	0.751249	0.859141		0.222098	3.54759	0.503343	2.47955	0.428559	3.33485
1.46444		0.357642	0.67033	0.201798		0.532358	2.8846	0.283141	2.1767	0.444683	3.47346		0.705295	0.705295	0.942058		0.265184	3.62937	0.521697	2.52167	0.329731	3.20278
1.5272		0.343656	0.706294	0.210789		0.47408	3.05438	0.26487	2.12423	0.462803	3.62124		0.757243	0.757243	0.811189		0.234688	3.63757	0.509834	2.53402	0.21125	2.94749
1.58996		0.35964	0.646354	0.168831		0.377715	3.13606	0.297135	2.06785	0.504654	3.70573		0.907093	0.907093	0.883117		0.118245	3.59297	0.496089	2.53102	0.230178	2.85402
1.65272		0.374625	0.506494	0.106893		0.297065	3.05376	0.295239	1.97845	0.549626	3.76493		0.93007	0.93007	0.906094		-0.00343134	3.57332	0.52142	2.5476	0.270441	2.98487
1.71548		0.336663	0.412587	0.0559441		0.295261	2.9317	0.241274	1.86266	0.577717	3.80464		0.859141	0.859141	0.759241		-0.0374947	3.61881	0.563858	2.57662	0.256877	3.17709
1.77824		0.238761	0.423576	0.040959		0.336609	2.94748	0.206636	1.80508	0.655792	3.77864		0.857143	0.857143	0.835165		0.0116359	3.67665	0.594708	2.62548	0.138049	3.20692
1.841		0.170829	0.536464	0.045954		0.341058	3.10289	0.14648	1.75435	0.538533	3.81551		0.885115	0.885115	0.942058		0.0175698	3.64206	0.586372	2.62745	-0.0159855	3.05142
1.90377		0.154845	0.67033	0.0579421		0.306314	3.14394	0.112242	1.68163	0.37319	3.64432		0.854146	0.854146	0.803197		0.0198526	3.5512	0.564833	2.69388	-0.158107	2.86962
1.96653		0.168831	0.74026	0.0769231		0.23012	3.19427	0.152869	1.65758	0.270756	3.59228		0.739261	0.739261	0.902098		-0.0593265	3.42904	0.550864	2.74729	-0.0981867	2.96217
2.02929		0.124875	0.772228	0.0719281		0.291654	3.11769	0.141776	1.63437	0.264478	3.60437		0.6004	0.6004	0.802198		-0.151762	3.04867	0.577062	2.76696	0.0383812	3.16027
2.09205		0.0589411	0.848152	0.0579421		0.451843	3.0883	0.127195	1.57901	0.217014	3.59852		0.48951	0.48951	0.549451		-0.146516	2.93984	0.584675	2.78084	0.147904	3.36282
2.15481		0.021978	0.99001	0.0539461		0.606824	3.11718	0.0476002	1.54476	0.154689	3.6321		0.425574	0.425574	0.47952		-0.159732	2.89087	0.592969	2.77501	0.144795	3.31173
2.21757		0.013986	0.869131	0.0569431		0.794688	3.20671	0.0266451	1.5462	0.150927	3.75429		0.397602	0.397602	0.554446		-0.180221	2.86357	0.574365	2.80302	0.0545311	3.10576
2.28033		0.015984	0.782218	0.0789211		0.820711	3.17899	0.106667	1.5756	0.175564	3.7026		0.370629	0.370629	0.635365		-0.210879	2.89098	0.506373	2.79433	-0.0659011	2.94363
2.3431		0.025974	0.801199	0.0999001		0.734324	3.08833	0.154072	1.62774	0.168565	3.51297		0.372627	0.372627	0.592408		-0.278141	2.92373	0.415848	2.7789	-0.10043	2.98524
2.40586		0.045954	0.869131	0.106893		0.584585	2.99896	0.15826	1.65085	0.142335	3.2939		0.424575	0.424575	0.482517		-0.281851	2.94598	0.352662	2.64342	-0.0366656	3.16158
2.46862		0.0579421	0.924076	0.0869131		0.557005	2.86742	0.0986298	1.60396	0.12907	3.20387		0.538462	0.538462	0.457542		-0.25002	2.94754	0.273163	2.5373	0.0321287	3.24022
2.53138		0.036963	0.955045	0.0749251		0.578373	2.85215	-0.0471874	1.54517	0.117999	3.2884		0.681319	0.681319	0.539461		-0.201657	3.01458	0.192412	2.51366	0.0355398	3.22746
2.59414		0.037962	0.96004	0.0639361		0.549834	2.81261	-0.16065	1.53708	0.10752	3.52135		0.78022	0.78022	0.696304		-0.197921	3.1377	0.185527	2.55795	-0.0394239	3.08937
2.6569		0.042957	0.817183	0.042957		0.449936	2.75057	-0.219704	1.53144	0.101304	3.71916		0.786214	0.786214	0.75025		-0.205361	3.19716	0.214749	2.56313	-0.0188341	3.0776
2.71967		0.0639361	0.637363	0.024975		0.305137	2.77105	-0.202841	1.52559	0.184278	3.74559		0.752248	0.752248	0.63037		-0.134245	3.18945	0.245984	2.52071	-0.0087011	3.26002
2.78243		0.0759241	0.509491	0.011988		0.232472	2.77942	-0.218009	1.54088	0.316838	3.64347		0.781219	0.781219	0.492507		-0.159387	3.13378	0.220416	2.41919	0.076127	3.53217
2.84519		0.0759241	0.502498	0.00999001		0.240964	2.78769	-0.176492	1.53197	0.353037	3.5724		0.872128	0.872128	0.440559		-0.115735	3.01467	0.13432	2.3581	0.0728078	3.68493
2.90795		0.0869131	0.567433	0.023976		0.204416	2.74729	-0.116939	1.54919	0.222619	3.42375		0.961039	0.961039	0.498501		-0.0931464	2.92336	0.0458836	2.37513	-0.078249	3.65775
2.97071		0.135864	0.646354	0.0549451		0.11688	2.70069	-0.0836255	1.59486	-0.0484369	3.30141		0.948052	0.948052	0.594406		-0.132712	2.95591	0.0330154	2.41926	-0.192533	3.52412
3.03347		0.245754	0.684316	0.118881		-0.0159386	2.58867	-0.050074	1.68034	-0.282032	3.19829		0.793207	0.793207	0.612388		-0.179145	2.96718	0.114857	2.50127	-0.160597	3.4176
3.09623		0.355644	0.643357	0.16983		-0.155396	2.49981	-0.0995081	1.69879	-0.433018	3.13239		0.626374	0.626374	0.55045		-0.2137	2.89207	0.279603	2.53673	-0.147484	3.39958
3.159		0.34965	0.625375	0.140859		-0.169799	2.46341	-0.169701	1.59848	-0.494734	3.15272		0.525475	0.525475	0.485514		-0.274398	2.76167	0.294816	2.50905	-0.198043	3.33605
3.22176		0.256743	0.662338	0.102897		-0.135526	2.4536	-0.203329	1.49418	-0.514276	3.11158		0.551449	0.551449	0.512488		-0.282935	2.62525	0.182236	2.44643	-0.285573	3.29484
3.28452		0.18981	0.8002	0.105894		-0.108144	2.4946	-0.188421	1.45715	-0.540359	3.05438		0.667333	0.667333	0.6004		-0.341889	2.5823	0.0218708	2.35277	-0.37896	3.28963
3.34728		0.167832	0.959041	0.176823		-0.0781759	2.55631	-0.127557	1.4494	-0.577208	2.93479		0.76024	0.76024	0.633367		-0.360522	2.56933	-0.039167	2.31726	-0.332918	3.36405
3.41004		0.182817	0.973027	0.240759		-0.10884	2.6408	-0.0770671	1.4578	-0.560996	2.94945		0.677323	0.677323	0.539461		-0.347496	2.61862	0.00596398	2.36159	-0.312244	3.37145
3.4728		0.211788	0.955045	0.205794		-0.123448	2.75885	-0.1007	1.45979	-0.557903	3.05387		0.487512	0.487512	0.42957		-0.444126	2.59344	0.122477	2.43979	-0.236627	3.47379
3.53556		0.196803	0.776224	0.103896		-0.158308	2.8936	-0.151591	1.49154	-0.433822	3.20966		0.348651	0.348651	0.388611		-0.541268	2.55349	0.229172	2.48224	-0.355426	3.53719
3.59833		0.171828	0.558442	0.034965		-0.151238	2.89842	-0.257605	1.43816	-0.261513	3.59798		0.300699	0.300699	0.445554		-0.521247	2.47707	0.240477	2.49689	-0.510117	3.49852
3.66109		0.144855	0.433566	0.010989		-0.202197	2.84853	-0.322142	1.40642	-0.157994	3.80475		0.382617	0.382617	0.562438		-0.491938	2.53468	0.169956	2.50088	-0.697031	3.41817
3.72385		0.160839	0.382617	0.00999001		-0.220644	2.81218	-0.345958	1.36593	-0.137876	3.79191		0.531469	0.531469	0.644356		-0.423501	2.53261	0.104033	2.47041	-0.708455	3.3504
3.78661		0.191808	0.383616	0.015984		-0.330675	2.74632	-0.302053	1.38101	-0.142085	3.65136		0.599401	0.599401	0.657343		-0.422692	2.61173	0.0488512	2.45302	-0.682925	3.34532
3.84937		0.23976	0.394605	0.028971		-0.443404	2.78374	-0.282096	1.34356	-0.199902	3.51672		0.535465	0.535465	0.64036		-0.517166	2.67252	0.0664039	2.48284	-0.581796	3.24464
3.91213		0.2997	0.401598	0.037962		-0.472804	2.71257	-0.243825	1.39998	-0.308988	3.42856		0.3996	0.3996	0.64036		-0.63644	2.57454	0.10182	2.43537	-0.646104	3.08795
3.9749		0.352647	0.417582	0.0539461		-0.424722	2.60826	-0.23306	1.37329	-0.326912	3.33376		0.320679	0.320679	0.631369		-0.815077	2.41705	0.109303	2.39221	-0.836175	2.97334
4.03766		0.430569	0.45954	0.103896		-0.420722	2.50914	-0.267358	1.41289	-0.358831	3.18226		0.320679	0.320679	0.591409		-0.831701	2.35796	0.0316486	2.30624	-0.871833	3.11241
4.10042		0.522478	0.548452	0.191808		-0.451301	2.43723	-0.247839	1.48463	-0.399648	2.98871		0.397602	0.397602	0.47952		-0.819388	2.2643	-0.053283	2.21219	-0.728769	3.25321
4.16318		0.564436	0.671329	0.296703		-0.41599	2.4703	-0.195241	1.59319	-0.515302	2.81489		0.48951	0.48951	0.35964		-0.841583	2.2344	-0.133522	2.1891	-0.545895	3.37958
4.22594		0.529471	0.791209	0.368631		-0.382821	2.52793	-0.19577	1.62092	-0.584736	2.72089		0.51049	0.51049	0.300699		-0.796129	2.23873	-0.188358	2.15201	-0.380753	3.35611
4.2887		0.415584	0.917083	0.366633		-0.33437	2.54368	-0.212011	1.58134	-0.654834	2.65125		0.477522	0.477522	0.2997		-0.901917	2.16086	-0.197144	2.16928	-0.476451	3.20489
4.35146		0.277722	0.981019	0.316683		-0.262103	2.54334	-0.281672	1.46404	-0.688775	2.62432		0.411588	0.411588	0.305694		-0.998528	2.16105	-0.242019	2.13635	-0.534843	3.13815
4.41423		0.211788	0.961039	0.254745		-0.226829	2.5907	-0.337569	1.37073	-0.894452	2.73442		0.388611	0.388611	0.280719		-1.09358	2.19981	-0.302052	2.10333	-0.607062	3.11516
4.47699		0.206793	0.986014	0.195804		-0.295112	2.59713	-0.371448	1.32573	-0.936366	2.83624		0.412587	0.412587	0.231768		-1.14593	2.27045	-0.346502	2.07587	-0.495593	3.16772
4.53975		0.268731	0.838162	0.158841		-0.369943	2.55337	-0.383476	1.34424	-0.800289	2.95142		0.474525	0.474525	0.1998		-1.15079	2.34823	-0.350674	2.05415	-0.318278	3.20146
4.60251		0.365634	0.692308	0.153846		-0.399322	2.37905	-0.411269	1.35744	-0.635938	3.02882		0.513487	0.513487	0.190809		-1.12181	2.41307	-0.392833	2.02029	-0.31229	3.16233
4.66527		0.444555	0.641359	0.178821		-0.424435	2.17413	-0.428238	1.35843	-0.629546	3.00279		0.519481	0.519481	0.222777		-1.09802	2.38082	-0.385044	2.04096	-0.365333	3.05531
4.72803		0.450549	0.75025	0.248751		-0.401257	2.11922	-0.412991	1.32024	-0.818641	2.80361		0.498501	0.498501	0.285714		-1.05606	2.32799	-0.37483	2.09769	-0.530149	2.91869
4.79079		0.364635	0.955045	0.337662		-0.408949	2.17319	-0.464225	1.2941	-1.04384	2.51489		0.471528	0.471528	0.305694		-1.05554	2.26075	-0.356621	2.08404	-0.600398	2.97263
4.85356		0.23976	0.856144	0.376623		-0.396019	2.34882	-0.492845	1.19103	-1.0977	2.39992		0.438561	0.438561	0.267732		-1.14326	2.18916	-0.405967	2.09556	-0.596412	3.03564
4.91632		0.171828	0.786214	0.335664		-0.360925	2.51652	-0.540781	1.15453	-0.922843	2.43441		0.398601	0.398601	0.213786		-1.26844	2.13252	-0.444615	2.09732	-0.531467	3.02802
4.97908		0.17982	0.782218	0.315684		-0.356137	2.44695	-0.578385	1.22551	-0.869329	2.49956		0.332667	0.332667	0.184815		-1.34769	2.06383	-0.502548	2.11297	-0.489621	2.96767
5.04184		0.233766	0.855145	0.362637		-0.415615	2.42167	-0.61039	1.29949	-0.910597	2.50231		0.278721	0.278721	0.176823		-1.35325	1.95187	-0.507861	2.16991	-0.577805	2.95937
5.1046		0.317682	0.871129	0.468531		-0.538042	2.28309	-0.572064	1.2961	-0.961362	2.44922		0.242757	0.242757	0.225774		-1.37036	1.8696	-0.481139	2.28246	-0.684441	2.86961
5.16736		0.370629	0.849151	0.589411		-0.481423	2.20997	-0.502078	1.36335	-0.958781	2.37349		0.265734	0.265734	0.313686		-1.30552	1.89124	-0.466116	2.28681	-0.808205	2.71554
5.23013		0.392607	0.787213	0.642358		-0.522571	2.19781	-0.497671	1.36182	-0.937419	2.37728		0.367632	0.367632	0.422577		-1.23738	1.92592	-0.48971	2.24696	-0.85335	2.52934
5.29289		0.355644	0.717283	0.669331		-0.371241	2.15611	-0.505735	1.37766	-0.876803	2.30425		0.52048	0.52048	0.535465		-1.17787	1.97529	-0.538621	2.17598	-0.860269	2.41751
5.35565		0.350649	0.604396	0.782218		-0.258202	2.09088	-0.468615	1.34985	-0.851843	2.1909		0.61039	0.61039	0.622378		-1.1295	1.96764	-0.574751	2.02303	-0.900067	2.408
5.41841		0.383616	0.471528	0.99001		-0.329267	2.03007	-0.481425	1.38977	-0.959317	1.99532		0.595405	0.595405	0.694306		-1.08793	1.92205	-0.57294	1.99147	-1.04625	2.36831
5.48117		0.38961	0.367632	0.811189		-0.248935	2.01893	-0.418258	1.38191	-1.03779	1.75753		0.569431	0.569431	0.767233		-1.08261	1.96102	-0.586626	2.09049	-1.11289	2.29242
5.54393		0.313686	0.323676	0.854146		-0.279922	2.17157	-0.466951	1.34955	-1.02167	1.71069		0.613387	0.613387	0.855145		-1.08628	2.10514	-0.5928	2.20265	-1.14652	2.25226
5.60669		0.213786	0.33966	0.916084		-0.265092	2.38654	-0.534783	1.33671	-0.993027	1.84239		0.728272	0.728272	0.89011		-1.04156	2.21879	-0.606194	2.13221	-1.16122	2.35556
5.66946		0.130869	0.381618	0.675325		-0.197066	2.4545	-0.69189	1.277	-0.99375	2.09008		0.85015	0.85015	0.874126		-0.968131	2.21977	-0.633346	2.08895	-1.06133	2.51114
5.73222		0.111888	0.403596	0.593407		-0.180731	2.39264	-0.761523	1.19654	-1.12158	2.18489		0.865135	0.865135	0.764236		-0.924215	2.14761	-0.686556	2.09099	-0.969223	2.63273
5.79498		0.120879	0.37962	0.671329		-0.235696	2.28633	-0.746372	1.14559	-1.19855	2.05583		0.734266	0.734266	0.582418		-0.936429	2.0545	-0.642185	2.17755	-0.894341	2.72098
5.85774		0.145854	0.342657	0.81019		-0.34103	2.24161	-0.761567	1.14754	-1.20764	1.87013		0.592408	0.592408	0.468531		-1.00364	2.02593	-0.53671	2.32224	-0.771806	2.72643
5.9205		0.156843	0.334665	0.888112		-0.392972	2.31426	-0.722834	1.17609	-1.11897	1.81001		0.577423	0.577423	0.425574		-1.01785	2.05672	-0.510417	2.36935	-0.728672	2.76571
5.98326		0.156843	0.333666	0.852148		-0.331135	2.36433	-0.719789	1.22404	-1.05329	1.8585		0.633367	0.633367	0.407592		-1.02712	2.09829	-0.533761	2.3799	-0.674487	2.84969
6.04603		0.143856	0.311688	0.844156		-0.228154	2.33314	-0.707811	1.26063	-1.05659	1.89094		0.713287	0.713287	0.391608		-1.03144	2.09222	-0.56342	2.33051	-0.657387	3.04324
6.10879		0.163836	0.24975	0.946054		-0.150895	2.24179	-0.617366	1.32687	-1.01527	1.87077		0.677323	0.677323	0.354645		-1.0647	1.9882	-0.608726	2.31406	-0.614397	3.11624
6.17155		0.194805	0.195804	0.867133		-0.14017	2.21137	-0.531435	1.36816	-1.03084	1.78023		0.527473	0.527473	0.316683		-1.16428	1.77121	-0.552821	2.35745	-0.631067	3.02839
6.23431		0.204795	0.154845	0.729271		-0.181224	2.20667	-0.489264	1.33519	-1.02267	1.64737		0.392607	0.392607	0.298701		-1.23426	1.66355	-0.473077	2.42447	-0.719836	2.96056
6.29707		0.211788	0.150849	0.69031		-0.21257	2.25797	-0.459962	1.33012	-1.06981	1.56332		0.31968	0.31968	0.307692		-1.22044	1.61944	-0.421055	2.48359	-0.740959	2.83968
6.35983		0.214785	0.163836	0.696304		-0.283604	2.27496	-0.536453	1.26911	-1.10187	1.52855		0.337662	0.337662	0.333666		-1.10922	1.68599	-0.386218	2.53674	-0.792566	2.89718
6.42259		0.228771	0.174825	0.648352		-0.36801	2.22288	-0.539904	1.16642	-1.13911	1.47533		0.407592	0.407592	0.374625		-0.935538	1.81119	-0.338848	2.54777	-0.812177	2.95792
6.48536		0.275724	0.166833	0.539461		-0.389192	2.08447	-0.539027	1.11118	-1.20372	1.4013		0.445554	0.445554	0.433566		-0.789654	1.92255	-0.287582	2.54591	-0.778622	2.90208
6.54812		0.327672	0.13986	0.424575		-0.402798	1.98829	-0.540563	1.12282	-1.21544	1.23617		0.42957	0.42957	0.5005		-0.751766	1.93855	-0.231972	2.5628	-0.843729	2.77545
6.61088		0.33966	0.112887	0.357642		-0.371407	1.96569	-0.495222	1.1483	-1.21657	1.17509		0.393606	0.393606	0.554446		-0.80436	1.88184	-0.207631	2.64302	-0.875869	2.64376
6.67364		0.320679	0.0869131	0.314685		-0.298417	2.00538	-0.447307	1.15066	-1.30146	1.11386		0.352647	0.352647	0.491508		-0.937962	1.86973	-0.236301	2.60908	-0.832255	2.51505
6.7364		0.327672	0.0699301	0.250749		-0.313305	2.01283	-0.475947	1.17531	-1.35708	0.94163		0.318681	0.318681	0.367632		-0.968754	1.77088	-0.314221	2.5279	-0.725247	2.65919
6.79916		0.450549	0.0809191	0.186813		-0.487136	1.91823	-0.471302	1.17084	-1.56564	0.873379		0.334665	0.334665	0.263736		-0.97092	1.69815	-0.368149	2.49258	-0.635433	2.83093
6.86192		0.632368	0.106893	0.14985		-0.668079	1.75336	-0.408901	1.17379	-1.67659	0.831873		0.347652	0.347652	0.243756		-0.917073	1.68192	-0.35126	2.38833	-0.687863	2.89091
6.92469		0.744256	0.130869	0.161838		-0.743578	1.69256	-0.416336	1.16586	-1.57306	0.836596		0.405594	0.405594	0.342657		-0.866974	1.65578	-0.301567	2.47028	-0.84092	2.86464
6.98745		0.681319	0.153846	0.255744		-0.659714	1.73998	-0.469869	1.15898	-1.46538	0.902365		0.444555	0.444555	0.470529		-0.790232	1.76381	-0.330495	2.52086	-0.893383	2.76062
7.05021		0.519481	0.157842	0.385614		-0.587767	1.79955	-0.546088	1.11791	-1.33204	1.02832		0.452547	0.452547	0.503497		-0.816121	1.74855	-0.415552	2.52963	-0.937777	2.761
7.11297		0.373626	0.150849	0.458541		-0.558212	1.85022	-0.61471	1.07575	-1.36844	1.15619		0.421578	0.421578	0.397602		-0.900601	1.69473	-0.440035	2.47223	-0.936139	2.96393
7.17573		0.36963	0.135864	0.408591		-0.56732	1.83498	-0.586457	1.13069	-1.47417	1.07793		0.350649	0.350649	0.302697		-0.986111	1.62551	-0.501016	2.41744	-0.8867	2.9981
7.23849		0.478521	0.134865	0.305694		-0.646912	1.80979	-0.542411	1.23383	-1.5147	0.992425		0.30969	0.30969	0.280719		-1.05376	1.55881	-0.423245	2.38068	-0.837247	2.73665
7.30126		0.614386	0.131868	0.244755		-0.650986	1.81326	-0.500289	1.37414	-1.4266	0.947988		0.306693	0.306693	0.411588		-1.00889	1.57084	-0.320995	2.39787	-0.846829	2.49678
7.36402		0.636364	0.116883	0.244755		-0.627628	1.88591	-0.553223	1.4321	-1.44592	0.939622		0.365634	0.365634	0.574426		-0.953725	1.70185	-0.220233	2.43048	-0.926457	2.32268
7.42678		0.513487	0.0959041	0.263736		-0.654549	2.03574	-0.614716	1.40685	-1.47524	0.9481		0.398601	0.398601	0.631369		-0.898996	1.75079	-0.205736	2.46952	-1.02179	2.33858
7.48954		0.420579	0.0829171	0.296703		-0.647472	2.14881	-0.662933	1.35293	-1.53128	0.963233		0.390609	0.390609	0.54046		-0.858271	1.78917	-0.243847	2.44631	-1.05921	2.46878
7.5523		0.401598	0.0819181	0.324675		-0.629983	2.22276	-0.637748	1.3576	-1.422	0.950783		0.344655	0.344655	0.467532		-0.838698	1.68194	-0.25656	2.42014	-0.905966	2.54673
7.61506		0.43956	0.0989011	0.363636		-0.564994	2.1632	-0.574641	1.42995	-1.37592	0.959081		0.316683	0.316683	0.542458		-0.84333	1.58267	-0.231573	2.42868	-0.967022	2.41641
7.67782		0.5005	0.13986	0.403596		-0.622504	2.05482	-0.542678	1.49691	-1.39134	1.10975		0.336663	0.336663	0.794206		-0.754165	1.58703	-0.195023	2.47394	-1.04925	2.24252
7.74059		0.509491	0.148851	0.403596		-0.745511	1.9729	-0.565892	1.47546	-1.46592	1.15332		0.380619	0.380619	0.982018		-0.744167	1.70193	-0.194626	2.5223	-1.15179	2.08472
7.80335		0.477522	0.122877	0.341658		-0.78599	1.98751	-0.600718	1.39461	-1.52065	1.01717		0.394605	0.394605	0.993007		-0.795481	1.71028	-0.19636	2.54232	-1.22681	2.10874
7.86611		0.454545	0.0899101	0.261738		-0.660728	2.01469	-0.688259	1.36665	-1.5613	0.862442		0.345654	0.345654	0.749251		-0.843565	1.63316	-0.232789	2.49132	-1.20821	2.20903
7.92887		0.5005	0.0749251	0.1998		-0.708915	2.0018	-0.661676	1.38194	-1.60207	0.747743		0.271728	0.271728	0.47952		-0.944737	1.52037	-0.22867	2.44443	-1.07283	2.39688
7.99163		0.616384	0.0889111	0.172827		-0.703387	1.92608	-0.543451	1.45692	-1.57214	0.696202		0.20979	0.20979	0.34965		-1.038	1.48119	-0.195004	2.43922	-1.03258	2.49537
8.05439		0.755245	0.10989	0.178821		-0.807705	1.84189	-0.569852	1.49561	-1.5605	0.755738		0.155844	0.155844	0.308691		-1.10997	1.41958	-0.189388	2.45462	-1.10702	2.41435
8.11715		0.805195	0.124875	0.190809		-0.768783	1.78819	-0.530145	1.48508	-1.58247	0.778508		0.114885	0.114885	0.277722		-1.14427	1.33968	-0.169555	2.47316	-1.12202	2.38201
8.17992		0.705295	0.124875	0.208791		-0.689782	1.7985	-0.603298	1.38429	-1.52612	0.796316		0.111888	0.111888	0.238761		-1.18397	1.31177	-0.168189	2.52403	-0.965158	2.46651
8.24268		0.553447	0.101898	0.238761		-0.604953	1.86118	-0.607358	1.34203	-1.41022	0.784973		0.136863	0.136863	0.225774		-1.19429	1.37933	-0.162439	2.56998	-0.896468	2.56439
8.30544		0.468531	0.10989	0.310689		-0.551379	1.95459	-0.569067	1.31869	-1.26683	0.816521		0.192807	0.192807	0.271728		-1.12794	1.53232	-0.223661	2.57528	-0.895434	2.60947
8.3682		0.46953	0.140859	0.406593		-0.632433	1.96954	-0.595256	1.28098	-1.18308	0.90589		0.302697	0.302697	0.34965		-1.01685	1.61217	-0.283973	2.52696	-1.04212	2.6006
8.43096		0.554446	0.205794	0.460539		-0.776872	1.81342	-0.592557	1.26088	-1.17906	0.967192		0.405594	0.405594	0.42957		-0.941551	1.68676	-0.316432	2.46161	-1.05427	2.61465
8.49372		0.67033	0.283716	0.446553		-0.896907	1.6731	-0.630263	1.1981	-1.22163	0.994763		0.443556	0.443556	0.436563		-0.890044	1.69557	-0.341458	2.37092	-1.04256	2.62014
8.55649		0.726274	0.284715	0.393606		-0.947534	1.60812	-0.691974	1.13884	-1.27889	0.939711		0.426573	0.426573	0.380619		-0.867761	1.64492	-0.361931	2.39162	-0.929783	2.72226
8.61925		0.652348	0.245754	0.394605		-0.942565	1.54566	-0.731456	1.08629	-1.31062	0.878133		0.393606	0.393606	0.343656		-0.907197	1.63566	-0.317671	2.46862	-0.79621	2.73117
8.68201		0.534466	0.222777	0.475524		-0.884568	1.58225	-0.808552	1.05678	-1.2986	0.902118		0.377622	0.377622	0.372627		-0.955563	1.64226	-0.304864	2.54338	-0.783403	2.73778
8.74477		0.448551	0.252747	0.634366		-0.831007	1.5018	-0.834855	1.0004	-1.25641	0.95379		0.378621	0.378621	0.415584		-0.957874	1.64358	-0.31701	2.50797	-0.984422	2.65053
8.80753		0.471528	0.360639	0.791209		-0.798468	1.46001	-0.829972	0.948579	-1.17408	1.03423		0.393606	0.393606	0.473526		-0.988443	1.66704	-0.337002	2.47988	-1.08275	2.50655
8.87029		0.586414	0.468531	0.814186		-0.86374	1.37972	-0.813862	0.959028	-1.14158	1.10131		0.437562	0.437562	0.559441		-0.991323	1.7278	-0.355887	2.46566	-1.14477	2.39827
8.93305		0.707293	0.51049	0.752248		-0.853019	1.4075	-0.748682	1.02633	-1.06788	1.08971		0.55045	0.55045	0.699301		-0.893985	1.92431	-0.368417	2.53298	-1.10549	2.34807
8.99582		0.733267	0.509491	0.7003		-0.896475	1.56502	-0.740227	1.06524	-1.07176	1.05174		0.715285	0.715285	0.916084		-0.772695	2.17761	-0.361269	2.58311	-1.00032	2.30091
9.05858		0.651349	0.475524	0.736264		-0.839722	1.64874	-0.750174	1.1204	-1.10037	1.10619		0.916084	0.916084	0.842158		-0.65091	2.38144	-0.381449	2.58229	-1.06657	2.25598
9.12134		0.573427	0.496503	0.861139		-0.827908	1.64534	-0.821611	1.15088	-1.12095	1.25638		0.964036	0.964036	0.688312		-0.642126	2.39308	-0.420261	2.51354	-1.19911	2.1555
9.1841		0.548452	0.585415	0.978022		-0.777239	1.64484	-0.788258	1.1533	-1.0935	1.37002		0.96004	0.96004	0.653347		-0.671642	2.28317	-0.468947	2.51756	-1.30677	2.13485
9.24686		0.602398	0.645355	0.981019		-0.708525	1.66641	-0.738811	1.22731	-1.04289	1.39519		0.977023	0.977023	0.713287		-0.699165	2.15343	-0.468259	2.55811	-1.32644	2.16231
9.30962		0.616384	0.642358	0.994006		-0.674683	1.7266	-0.72117	1.29439	-0.979505	1.43196		0.917083	0.917083	0.767233		-0.644994	2.20466	-0.437374	2.55341	-1.28164	2.18311
9.37238		0.579421	0.573427	0.947053		-0.573667	1.82817	-0.711341	1.32496	-0.989036	1.4825		0.972028	0.972028	0.746254		-0.551304	2.27063	-0.430115	2.62464	-1.18978	2.17748
9.43515		0.513487	0.498501	0.927073		-0.527889	1.9399	-0.752447	1.36156	-1.04669	1.53847		0.897103	0.897103	0.647353		-0.503893	2.35981	-0.442025	2.58637	-1.12771	2.16985
9.49791		0.503497	0.460539	0.89011		-0.528164	1.97813	-0.760075	1.32022	-1.12142	1.57971		0.776224	0.776224	0.546454		-0.499528	2.4587	-0.485081	2.5283	-1.14024	2.16544
9.56067		0.559441	0.435564	0.797203		-0.538204	1.91927	-0.701517	1.33346	-1.17445	1.64437		0.757243	0.757243	0.494505		-0.496149	2.44929	-0.531089	2.56279	-1.23207	2.09915
9.62343		0.66034	0.402597	0.621379		-0.534716	1.84106	-0.563662	1.38884	-1.21195	1.54488		0.837163	0.837163	0.480519		-0.47751	2.34765	-0.474329	2.55036	-1.30992	1.98989
9.68619		0.762238	0.293706	0.408591		-0.504112	1.84496	-0.403807	1.4483	-1.20569	1.38891		0.962038	0.962038	0.538462		-0.470076	2.21925	-0.445512	2.5579	-1.29313	1.89167
9.74895		0.751249	0.214785	0.301698		-0.442444	1.83995	-0.398596	1.46623	-1.25133	1.26723		0.928072	0.928072	0.672328		-0.550978	2.12186	-0.484841	2.53035	-1.27555	1.86805
9.81172		0.699301	0.166833	0.301698		-0.423499	1.90127	-0.400849	1.5012	-1.25296	1.28646		0.845155	0.845155	0.807193		-0.638191	2.0178	-0.528492	2.45499	-1.30312	1.90279
9.87448		0.71029	0.18981	0.352647		-0.524289	1.87796	-0.454767	1.53112	-1.29299	1.3		0.832168	0.832168	0.88012		-0.703931	1.96834	-0.606592	2.35534	-1.34137	1.95379
9.93724		0.796204	0.238761	0.372627		-0.64799	1.89791	-0.476681	1.57703	-1.37275	1.3944		0.898102	0.898102	0.814186		-0.702215	2.00104	-0.633919	2.31197	-1.45529	1.88563
10		0.881119	0.262737	0.331668		-0.727849	1.94537	-0.435828	1.64527	-1.29028	1.34295		0.936064	0.936064	0.625375		-0.589094	2.15054	-0.62124	2.30451	-1.56848	1.90761
