# Supplementary material for: Role of anterior insula cortex in context-induced relapse of nicotine-seeking
Source: eLife. 2022 May 10;11:e75609. doi: 10.7554/eLife.75609 (PMC9119676; doi:10.7554/eLife.75609)
Supplement: Figure 2—figure supplement 2—source data 1. [file elife-75609-fig2-figsupp2-data1.xlsx]

## Sheet: S2A
Self-administration (Exp. 2 - AI Photom group)
	REW		ACT		INAC
	Pre	Post	Pre	Post	Pre	Post
	0.433355	1.93601	0.63426	1.06233	0.0541612	0.186583
	-0.111577	1.3577	0.0965144	1.02938	-0.0816994	0.455625
	0.0493827	0.524555	-0.414106	0.00193484	0.0894611	0.33371
	0.0938806	0.0149271	0.250989	0.380165	0.00310327	0.498002
	-0.254263	-0.143493	-0.241256	-0.117762	0.0357536	0.333356
	0.395106	1.79094	0.119094	0.891059	-0.0408583	0.827795
	0.138198	1.68316	-0.373726	0.877488	-0.382678	0.56543

## Sheet: S2B
Punishment (Exp. 2 - AI Photom group)
	REW		ACT		INAC		PUN
	Pre	Post	Pre	Post	Pre	Post	Pre	Post
	1.81181	2.49645	2.39728	2.67423	-0.70385	-0.256315	1.51042	8.7633
	0.158633	0.619109	-0.434201	-0.559959	0.100482	0.381271	-0.525636	0.513512
	-0.0779884	0.5534	0.676219	1.71542	0.546638	0.986522	0.174056	2.94062
	0.67774	4.08883	0.484783	1.91306	-0.250297	2.04901	1.18781	8.55432
	0.805105	2.08061	0.552272	1.53203	-0.540473	0.387761	0.26164	1.15817
	0.157392	0.0769775	0.00651008	0.172285	-0.151291	-0.271165	0.0186868	0.787732
	0.592515	1.32934	0.250097	1.27163	0.359467	1.31904	0.155139	0.955095

## Sheet: S2C
Tests (Exp. 2 - AI Photom group)
	REW		ACT		INAC
	Pre	Post	Pre	Post	Pre	Post
	2.06161	4.68312	0.754972	1.0347	-0.115189	0.650502
	0.136753	0.481036	0.378015	1.71678	-0.645715	0.920999
	0.407122	0.748705	-0.209483	0.275338	0.369789	1.67963
	0.285392	0.468406	-0.0795662	0.189343	0.537666	-0.479852
	0.30462	0.534104	0.233712	0.634147	0.43389	1.08965
	-0.434398	0.667773	0.0780692	0.601959	-0.537978	1.74521
	1.42236	3.75907	-0.0467976	2.55801	0.726379	3.18313
