# Supplementary material for: Role of anterior insula cortex in context-induced relapse of nicotine-seeking
Source: eLife. 2022 May 10;11:e75609. doi: 10.7554/eLife.75609 (PMC9119676; doi:10.7554/eLife.75609)
Supplement: Figure 2—source data 1. [file elife-75609-fig2-data1.xlsx]

## Sheet: 2C
Self-administration (Exp. 2 - AI Photom group)
Experiment	Rat	SEX	inf_1	inf_2	inf_3	inf_4	inf_5	inf_6	inf_7	inf_8	inf_9	inf_10	inf_11	inf_12	inf_13	inf_14	inf_15	inf_16	inf_17	inf_18	act_1	act_2	act_3	act_4	act_5	act_6	act_7	act_8	act_9	act_10	act_11	act_12	act_13	act_14	act_15	act_16	act_17	act_18	inact_1	inact_2	inact_3	inact_4	inact_5	inact_6	inact_7	inact_8	inact_9	inact_10	inact_11
Nic_14a	2	2	5	1	2	1	4	7	10	11	10	9	8	10	8	12	13	12	9	9	3	2	1	0	1	6	2	16	12	13	18	24	19	33	42	32	28	28	0	4	6	1	5	9	13	4	6	7	13
Nic_14a	3	2	1	6	6	9	9	14	15	13	13	14	9	11	7	12	14	11	9	12	0	1	1	1	0	1	1	17	14	19	28	25	21	34	42	28	25	28	1	3	4	3	2	9	9	10	8	7	10
Nic_14a	4	2	3	3	2	1	0	7	2	4	10	9	8	9	5	8	6	3	4	4	3	1	0	1	0	0	0	5	15	16	18	26	12	19	13	9	9	12	2	4	2	2	2	1	2	1	2	8	7
Nic_14b	1	2	2	2	3	4	1	1	4	0	0	1	4	1	1	1	11	3	1	3	0	0	0	1	0	0	0	1	1	1	9	3	7	4	34	16	3	8	3	4	3	3	2	1	2	24	5	2	6
Nic_14b	3	2	5	6	7	5	6	8	13	8	11	11	10	5	12	10	7	13	13	14	2	1	1	0	0	3	6	11	17	13	27	14	28	23	27	42	42	32	8	6	7	3	3	2	20	8	4	6	7
Nic_14b	4	2	1	3	3	3	4	7	8	2	8	8	4	5	6	5	7	4	7	3	0	0	4	3	3	2	4	4	14	12	14	15	20	13	16	12	21	8	10	12	9	21	5	9	8	19	9	16	15
Nic_14b	6	2	2	3	9	10	5	7	10	3	3	8	6	5	1	3	0	8	8	8	0	0	2	3	1	1	2	7	8	9	15	12	4	8	1	16	22	20	1	4	4	14	5	10	3	7	4	15	11
[truncated: 7 more columns]

## Sheet: 2D
Punishment (Exp. 2 - AI Photom group)
Experiment	Rat	SEX	inf_1	inf_2	inf_3	inf_4	inf_5	inf_6	inf_7	inf_8	inf_9	inf_10	act_1	act_2	act_3	act_4	act_5	act_6	act_7	act_8	act_9	act_10	inact_1	inact_2	inact_3	inact_4	inact_5	inact_6	inact_7	inact_8	inact_9	inact_10
Nic_14a	2	2	4	0	1	0	0	1					13	0	2	0	0	2					11	1	1	13	7	4
Nic_14a	3	2	10	2	4	3	1	0					26	8	12	7	2	0					25	18	23	26	12	29
Nic_14a	4	2	4	4	4	3	2	1					12	8	10	7	5	2					13	4	15	8	5	6
Nic_14b	1	2	4	8	1	5							10	36	4	19							6	8	11	4
Nic_14b	3	2	13	6	5	4	3	2	3	1	1	1	50	24	19	12	6	4	9	3	3	3	8	16	12	15	36	38	28	21	11	20
Nic_14b	4	2	3	6	6	6	4	1	5	3	4	2	8	33	18	25	12	10	13	7	13	4	5	10	4	9	1	8	5	1	0	5
Nic_14b	6	2	7	7	5	5	5	4	5	2	3	2	27	32	15	31	18	22	10	6	6	5	13	16	9	4	14	16	10	12	28	54

## Sheet: 2E
Tests (Exp. 2 - AI Photom group)
Experiment	Rat	SEX	act_sum	inact_sum	cue_sum	TO_sum
Nic_14a	2	2	28	25	4	24
Nic_14a	3	2	53	30	12	41
Nic_14a	4	2	122	23	22	100
Nic_14b	1	2	80	11	16	64
Nic_14b	3	2	99	18	19	80
Nic_14b	4	2	44	19	11	33
Nic_14b	6	2	99	29	18	81

## Sheet: 2F
Self-administration (Exp. 2 - AI Photom group)
	NIC infusion								ACTIVE non-reinforced								INACTIVE								Permutation Tests				Bootstrap tests
Time	A2	A3	A4	B1	B3	B4	B6		A2	A3	A4	B1	B3	B4	B6		A2	A3	A4	B1	B3	B4	B6		REW-AC	REW-INAC	AC-INAC		REW		AC		INAC
-5	-0.161464	0.0367106	0.0981974	0.00256719	0.0784875	0.0468046	-0.00402632		-0.117101	0.320438	0.142651	-0.157141	0.212765	0.237735	0.121502		0.0848787	-0.117442	-0.174637	0.207324	0.0257299	-0.000731965	-0.0288278		0.100899	0.748252	0.0669331		-0.127347	0.159355	-0.0139116	0.257683	-0.16974	0.164022
-4.93724	-0.135087	0.0186016	0.141598	-0.0168929	0.0965445	-0.00103086	-0.00721154		-0.095212	0.230722	0.15197	-0.168885	0.116033	0.250993	0.21395		0.058551	-0.139672	-0.210115	0.156559	0.0292913	-0.031943	0.0129555		0.197802	0.484515	0.04995		-0.110402	0.161443	-0.0253824	0.246281	-0.179415	0.140815
-4.87448	-0.100793	0.0197717	0.166373	-0.0473008	0.109161	-0.0177731	0.000853164		-0.085049	0.138525	0.163485	-0.136048	0.0598101	0.248071	0.239372		0.0326518	-0.104461	-0.181519	0.106223	0.0458607	-0.0555792	0.0457205		0.394605	0.355644	0.0779221		-0.0934137	0.175716	-0.0231861	0.227314	-0.160424	0.137038
-4.81172	-0.0733652	0.0522856	0.136502	-0.0591673	0.098459	-0.00193439	0.0171005		-0.0832296	0.0842918	0.174398	-0.098019	0.059	0.198482	0.231783		0.00975596	-0.0201548	-0.0979881	0.104005	0.0429428	-0.0683461	0.0441598		0.501499	0.410589	0.13986		-0.099916	0.167061	-0.038178	0.216488	-0.148114	0.150119
-4.74895	-0.0627013	0.0946914	0.06444	-0.0373749	0.067208	0.0170681	0.0434322		-0.0778583	0.0913857	0.172289	-0.0905893	0.082302	0.110783	0.227978		-0.00991973	0.047487	-0.0104688	0.145516	0.0156193	-0.0642097	0.0201489		0.404595	0.672328	0.231768		-0.0949772	0.153249	-0.0471088	0.212942	-0.132499	0.166556
-4.68619	-0.0691031	0.105957	0.000979331	0.001885	0.0315107	0.0120802	0.0726254		-0.0634515	0.148255	0.142439	-0.116236	0.0886864	0.0217239	0.232198		-0.027633	0.0352352	0.0359658	0.173633	-0.0181413	-0.0403131	0.0111231		0.291708	0.941059	0.286713		-0.114654	0.135963	-0.0464373	0.201828	-0.141705	0.162926
-4.62343	-0.084924	0.0658976	-0.0131135	0.0232294	0.00380869	-0.0134486	0.0828229		-0.0502894	0.216637	0.0871894	-0.13974	0.0667934	-0.0388912	0.221986		-0.0412115	-0.0536095	0.0391174	0.143297	-0.0458122	-0.00255809	0.0386552		0.244755	0.898102	0.326673		-0.126287	0.123843	-0.0631753	0.182486	-0.133185	0.146745
-4.56067	-0.0995525	-0.00119244	0.0162145	0.00208711	-0.0154721	-0.0330605	0.0577694		-0.0548214	0.258133	0.0338784	-0.115648	0.0370302	-0.0688675	0.187701		-0.0438475	-0.150671	0.0335799	0.0792288	-0.0749999	0.0359407	0.0838318		0.275724	0.793207	0.435564		-0.130426	0.107407	-0.0743949	0.167814	-0.134551	0.134634
-4.49791	-0.104402	-0.0474505	0.0479713	-0.0573457	-0.0307286	-0.0307804	0.0122226		-0.0790127	0.257579	0.0160166	-0.0295561	0.0205728	-0.0822607	0.155743		-0.0298281	-0.190055	0.051805	0.0549491	-0.117371	0.0630904	0.106605		0.284715	0.616384	0.637363		-0.129554	0.0967037	-0.0802371	0.155682	-0.123407	0.140415
-4.43515	-0.0969346	-0.0475015	0.0503316	-0.130683	-0.0401819	-0.0219045	-0.0127075		-0.10163	0.227238	0.0428671	0.0803613	0.014599	-0.0860351	0.164245		-0.00161471	-0.170711	0.0918756	0.109298	-0.164036	0.0751268	0.0872536		0.215784	0.404595	0.763237		-0.137938	0.0813417	-0.0800442	0.164069	-0.114237	0.147099
-4.37238	-0.0829436	-0.0224257	0.0286212	-0.194291	-0.0369156	-0.0375964	0.0129388		-0.0947034	0.192727	0.0895544	0.144296	0.000906682	-0.0749573	0.217846		0.0293234	-0.147627	0.121413	0.193263	-0.18594	0.07663	0.045791		0.131868	0.26973	0.724276		-0.148209	0.0720593	-0.0641172	0.165948	-0.101441	0.159475
-4.30962	-0.0744478	-0.0165089	0.010339	-0.236587	-0.0217225	-0.0903434	0.0769304		-0.0517389	0.173903	0.120263	0.112189	-0.0264158	-0.048346	0.275478		0.0488299	-0.163755	0.110677	0.213575	-0.163043	0.0747898	0.0217681		0.0719281	0.266733	0.553447		-0.148957	0.0853511	-0.0458664	0.181831	-0.0988089	0.161098
-4.24686	-0.0816929	-0.050654	0.00989082	-0.255244	-0.0100978	-0.158079	0.13707		0.000990489	0.173785	0.121041	-0.00626338	-0.0497161	-0.0231462	0.288838		0.0477586	-0.199189	0.0615805	0.133107	-0.110281	0.0745047	0.0386774		0.045954	0.31968	0.432567		-0.142513	0.0843663	-0.0420948	0.173768	-0.111216	0.159271
-4.1841	-0.103609	-0.100449	0.0153655	-0.252398	-0.0195263	-0.204057	0.164878		0.0242644	0.180023	0.107739	-0.148449	-0.0464773	-0.022	0.251486		0.0258377	-0.194031	0.00616416	0.0193529	-0.0684015	0.0778105	0.0879007		0.046953	0.327672	0.440559		-0.148304	0.0833132	-0.0549668	0.16415	-0.119537	0.146845
-4.12134	-0.125543	-0.120968	0.00953516	-0.235166	-0.0469178	-0.211389	0.171112		-0.000186032	0.174876	0.102523	-0.246941	-0.015169	-0.0474099	0.205892		-0.00853991	-0.119348	-0.0215367	-0.0174086	-0.065064	0.085022	0.141241		0.044955	0.213786	0.614386		-0.16158	0.0516622	-0.063771	0.15361	-0.117388	0.143094
-4.05858	-0.128729	-0.0921076	-0.00427723	-0.214473	-0.0627103	-0.196802	0.183836		-0.0541321	0.146291	0.107377	-0.275892	0.0221904	-0.0738974	0.201263		-0.0409295	-0.0175044	-0.0124551	0.064276	-0.0854185	0.0941043	0.173146		0.0659341	0.115884	0.958042		-0.167832	0.0491211	-0.0737383	0.147012	-0.0934787	0.161703
-3.99582	-0.104854	-0.0378662	-0.0043976	-0.195566	-0.0349578	-0.191093	0.206386		-0.100444	0.0941577	0.104762	-0.256921	0.0428852	-0.0723157	0.246116		-0.0562739	0.0333499	0.0157831	0.193327	-0.084492	0.0995837	0.172933		0.185814	0.108891	0.651349		-0.139932	0.0670597	-0.0792129	0.12744	-0.0728869	0.17544
-3.93305	-0.0627367	-0.000694235	0.0222754	-0.169694	0.0361928	-0.207807	0.207979		-0.115615	0.0298056	0.0825709	-0.227006	0.0446637	-0.0428226	0.301406		-0.0474546	-0.0058814	0.0407669	0.257589	-0.0320533	0.0951027	0.145502		0.573427	0.208791	0.423576		-0.118026	0.0991715	-0.0744901	0.117458	-0.0528066	0.184708
-3.87029	-0.0207713	0.0019334	0.0624674	-0.122949	0.10996	-0.231433	0.161394		-0.105245	-0.0293773	0.0523979	-0.205558	0.0419027	-0.019261	0.316042		-0.022075	-0.0983824	0.0569256	0.21476	0.0531944	0.0794318	0.108688		0.861139	0.465534	0.373626		-0.0884141	0.1298	-0.0842388	0.111787	-0.0535325	0.180894
-3.80753	0.00758421	-0.00559454	0.0897391	-0.0594676	0.136664	-0.234494	0.0839714		-0.0902321	-0.0667519	0.0395288	-0.190422	0.0439055	-0.0361985	0.267725		0.000612677	-0.168104	0.0749723	0.12606	0.114818	0.0595268	0.087987		0.581419	0.664336	0.325674		-0.078432	0.141297	-0.0986806	0.0972075	-0.0614657	0.181417
-3.74477	0.0217252	0.0168759	0.0922644	-0.0123087	0.102626	-0.20431	0.0298895		-0.0825124	-0.0721581	0.05732	-0.175478	0.0426095	-0.0910839	0.175408		0.00396833	-0.169723	0.101277	0.0815101	0.107235	0.0452666	0.102966		0.488511	0.651349	0.252747		-0.0834388	0.133032	-0.11389	0.103867	-0.0616553	0.174778
-3.68201	0.0294391	0.0829738	0.081659	-0.0206994	0.0440482	-0.153367	0.0360579		-0.0776825	-0.0457144	0.0957963	-0.160669	0.0241014	-0.142178	0.0816583		-0.0118133	-0.122526	0.121546	0.102696	0.0377492	0.0396228	0.149267		0.422577	0.59041	0.180819		-0.0829633	0.12541	-0.113311	0.0918765	-0.0650268	0.170103
-3.61925	0.0369576	0.163257	0.0739147	-0.0891751	0.014312	-0.105894	0.079386		-0.0694332	0.00113148	0.134886	-0.142416	-0.0107104	-0.14712	0.0253617		-0.030268	-0.0817202	0.110429	0.128375	-0.0370694	0.0348868	0.193929		0.345654	0.8002	0.21978		-0.0719871	0.141474	-0.111561	0.0905871	-0.0619802	0.170517
-3.55649	0.0440796	0.209907	0.0683594	-0.17211	0.0359168	-0.0761986	0.0948324		-0.064263	0.0491713	0.162747	-0.103764	-0.041506	-0.104216	0.022026		-0.035553	-0.0837586	0.0613101	0.0918095	-0.0588362	0.0206903	0.196362		0.35964	0.803197	0.543457		-0.0641477	0.164264	-0.1017	0.100789	-0.0781635	0.143452
-3.49372	0.0470025	0.198095	0.0520798	-0.207928	0.0842486	-0.0596455	0.0388975		-0.0755157	0.0803415	0.176964	-0.026816	-0.04612	-0.0543021	0.0568287		-0.0292741	-0.119915	0.005234	-0.00286368	-0.0170796	-0.00334998	0.141977		0.604396	0.431568	0.732268		-0.0657231	0.162303	-0.0799977	0.114944	-0.122793	0.120464
-3.43096	0.0429187	0.14513	0.02361	-0.174713	0.11742	-0.0426511	-0.065997		-0.102707	0.0879936	0.172739	0.0807407	-0.0209771	-0.0406565	0.0919617		-0.0289302	-0.154588	-0.0069843	-0.0909006	0.0430479	-0.0241667	0.0578603		0.944056	0.388611	0.313686		-0.0859162	0.136668	-0.0649068	0.134631	-0.14052	0.0953662
-3.3682	0.0312022	0.0918577	0.00332112	-0.11027	0.118955	-0.0198289	-0.150455		-0.123036	0.0805565	0.141179	0.178759	0.0172485	-0.0669751	0.0891419		-0.0485021	-0.159704	0.0500362	-0.125774	0.0623177	-0.0264207	-0.0064501		0.653347	0.475524	0.250749		-0.0987616	0.123218	-0.0680608	0.144727	-0.145041	0.0956299
-3.30544	0.0129932	0.066696	0.0130119	-0.0722047	0.108627	-0.00107591	-0.15887		-0.110357	0.0735985	0.0855752	0.224815	0.0486219	-0.0951616	0.0376494		-0.0817362	-0.13034	0.145419	-0.129855	0.0211332	-0.00829661	-0.0166253		0.761239	0.625375	0.448551		-0.0970656	0.121448	-0.0768455	0.135856	-0.143214	0.109655
-3.24268	-0.00681256	0.0662081	0.0465869	-0.0771569	0.1131	-0.00200824	-0.0917447		-0.0641644	0.0752291	0.033358	0.215022	0.0657485	-0.0843677	-0.0346857		-0.106674	-0.0759178	0.210263	-0.157057	-0.0434588	0.0141314	0.0242181		0.923077	0.552448	0.62038		-0.0762144	0.141029	-0.0848036	0.129	-0.128209	0.124143
-3.17992	-0.0170438	0.0667092	0.0687957	-0.0838603	0.13201	-0.0268644	0.00463158		-0.0155561	0.077601	0.0188615	0.189982	0.0726689	-0.0318673	-0.0830411		-0.106778	-0.0065211	0.194382	-0.214862	-0.0734159	0.0193798	0.0854587		0.752248	0.412587	0.542458		-0.0574021	0.163071	-0.0792278	0.124292	-0.120274	0.122804
-3.11715	-0.00382853	0.0510884	0.0488419	-0.0402428	0.138321	-0.060062	0.0798298		0.000523501	0.0634099	0.0469799	0.194017	0.0721262	0.024202	-0.0849689		-0.0854646	0.0699824	0.110357	-0.243762	-0.0449138	-0.00139375	0.136197		0.88012	0.347652	0.393606		-0.054488	0.165388	-0.0575593	0.137522	-0.117585	0.118144
-3.05439	0.0385015	0.0237932	-0.00592634	0.0546237	0.111605	-0.0753625	0.108204		-0.0203466	0.0223687	0.0792963	0.228288	0.0589718	0.0414864	-0.0600053		-0.0586412	0.144048	0.0215139	-0.184946	0.00947983	-0.0376108	0.162899		0.985015	0.486513	0.455544		-0.0695221	0.146443	-0.0612519	0.139959	-0.108036	0.120156
-2.99163	0.0986032	0.00290046	-0.0544535	0.141643	0.0648344	-0.0562411	0.0882524		-0.0483577	-0.0378655	0.0678213	0.249312	0.0279494	0.0126234	-0.0478103		-0.0354352	0.205325	-0.0163727	-0.0596986	0.033546	-0.0695511	0.167226		0.78022	0.795205	0.995005		-0.080756	0.138493	-0.0851948	0.124691	-0.0942722	0.134131
-2.92887	0.15256	0.00190019	-0.0617937	0.158739	0.0326011	-0.0105387	0.0314668		-0.0521074	-0.0971176	0.00784783	0.217175	-0.0145974	-0.0301025	-0.066582		-0.0107498	0.248999	-0.00333855	0.0366024	0.00317784	-0.0853245	0.155634		0.280719	0.977023	0.33966		-0.0832218	0.138666	-0.120285	0.0817533	-0.0885631	0.149705
-2.86611	0.180366	0.020717	-0.0321812	0.105373	0.0330724	0.0337416	-0.0392257		-0.0329566	-0.139031	-0.0484511	0.142552	-0.0508765	-0.0463259	-0.0965792		0.0216148	0.277916	0.0135397	0.0285526	-0.0508009	-0.0888346	0.134699		0.0649351	0.87013	0.104895		-0.07498	0.156364	-0.152467	0.0558674	-0.0879594	0.154191
-2.80335	0.179553	0.0515437	-0.000622925	0.045793	0.0470878	0.0489431	-0.0885883		-0.0228911	-0.161812	-0.0406596	0.0806944	-0.0655216	-0.0226913	-0.106549		0.0524206	0.296161	-0.00511787	-0.0577911	-0.0764413	-0.0926408	0.112115		0.043956	0.594406	0.145854		-0.0706375	0.155554	-0.158951	0.0549817	-0.0972111	0.134336
-2.74059	0.162705	0.0884334	0.00577285	0.0457096	0.0395702	0.0278835	-0.0852469		-0.0469383	-0.17316	0.0344049	0.0769751	-0.0585729	0.0213284	-0.0918812		0.0597614	0.302619	-0.0484448	-0.118712	-0.0561568	-0.10374	0.0949309		0.0829171	0.456543	0.390609		-0.068038	0.150686	-0.137942	0.0625536	-0.114971	0.123491
-2.67782	0.142327	0.128705	-0.00679452	0.107126	0.000609295	-0.0126431	-0.0312366		-0.0911085	-0.176509	0.110922	0.121164	-0.0431062	0.0582096	-0.079497		0.0313283	0.294328	-0.0691819	-0.0804572	-0.0244387	-0.115686	0.0839829		0.211788	0.434565	0.72028		-0.0636613	0.146099	-0.116864	0.0798258	-0.132963	0.109763
-2.61506	0.119889	0.16736	-0.0129731	0.16797	-0.0399885	-0.0462468	0.0272759		-0.11246	-0.16524	0.114463	0.158532	-0.0298357	0.0793991	-0.0939499		-0.0183741	0.276204	-0.0373944	0.0241843	-0.0266784	-0.113727	0.0728519		0.262737	0.51049	0.731269		-0.0607771	0.140808	-0.116592	0.0803328	-0.123795	0.113432
-2.5523	0.0901869	0.195088	-0.00257531	0.165218	-0.0427065	-0.055051	0.0314747		-0.0824044	-0.132472	0.0357799	0.145448	-0.015698	0.0974441	-0.126206		-0.0574371	0.263383	0.0249826	0.0923175	-0.0620054	-0.0881951	0.0552137		0.205794	0.594406	0.59041		-0.0638961	0.142795	-0.126132	0.084965	-0.109864	0.118199
-2.48954	0.0540334	0.204527	0.00594539	0.0952749	-0.00146098	-0.0362418	-0.0374278		-0.0172155	-0.085783	-0.0585922	0.0912965	0.0104261	0.12444	-0.14408		-0.0652699	0.269822	0.0661079	0.0593859	-0.0744855	-0.0450283	0.0317149		0.284715	0.758242	0.566434		-0.0766706	0.127513	-0.119689	0.0750058	-0.104011	0.124567
-2.42678	0.0229545	0.196869	-0.0120152	0.0118235	0.0472332	0.00483387	-0.13572		0.0375801	-0.0488393	-0.0911574	0.0455226	0.0503438	0.152729	-0.13261		-0.0509267	0.294123	0.0579706	-0.0375168	-0.0088785	-0.00475569	0.00617525		0.69031	0.974026	0.735265		-0.080124	0.113199	-0.107244	0.0934534	-0.102635	0.136327
-2.36402	0.0097929	0.179041	-0.0557127	-0.0302645	0.0600371	0.0635951	-0.192603		0.0527396	-0.044449	-0.0473074	0.046896	0.0867002	0.159688	-0.11457		-0.0413631	0.319147	0.0228369	-0.10518	0.123203	0.0102421	-0.0242443		0.674326	0.688312	0.94006		-0.0955134	0.10037	-0.0859881	0.136015	-0.102977	0.142503
-2.30126	0.0162536	0.153976	-0.0954366	-0.0214577	0.0298816	0.136304	-0.173177		0.0423467	-0.073657	0.0164682	0.0882371	0.0935749	0.131279	-0.123613		-0.0517797	0.327705	0.00428049	-0.0926874	0.238183	-0.00819606	-0.0688697		0.495504	0.589411	0.974026		-0.104602	0.101227	-0.0761251	0.141159	-0.0975587	0.143287
-2.23849	0.0317616	0.117072	-0.101406	0.0121022	-0.00900235	0.213005	-0.108128		0.0443512	-0.111946	0.0341582	0.128757	0.0597795	0.0785027	-0.160624		-0.0687857	0.318212	0.0162658	-0.0351008	0.249506	-0.0463778	-0.12806		0.86014	0.829171	0.958042		-0.0987256	0.108964	-0.0939836	0.122991	-0.104702	0.138327
-2.17573	0.0440956	0.0653966	-0.0732161	0.0544383	-0.0183456	0.274673	-0.061185		0.077057	-0.128629	-0.00615577	0.135933	0.0026489	0.0286445	-0.187323		-0.0628193	0.303352	0.027649	-0.00351381	0.147423	-0.0765643	-0.179903		0.534466	0.619381	0.942058		-0.0850034	0.132248	-0.117561	0.0982166	-0.135994	0.114378
-2.11297	0.0486153	0.00872635	-0.0380318	0.121497	0.00490916	0.301573	-0.0677586		0.119122	-0.113141	-0.0609725	0.113673	-0.0428705	0.00057244	-0.16899		-0.0160799	0.293049	-0.000570287	-0.0271665	0.0116358	-0.0761453	-0.190966		0.234765	0.263736	0.985015		-0.070771	0.145723	-0.123075	0.0845299	-0.156849	0.0963682
-2.05021	0.0461007	-0.0343572	-0.0209339	0.230025	0.0275772	0.286744	-0.105604		0.133657	-0.0841334	-0.0857807	0.0939229	-0.0521477	-0.00954755	-0.118401		0.0611675	0.280315	-0.0670918	-0.0748452	-0.057027	-0.0442029	-0.1478		0.222777	0.262737	0.972028		-0.0655082	0.140504	-0.117549	0.0872866	-0.157371	0.108132
-1.98745	0.0345043	-0.0554636	-0.0207753	0.351444	0.0151892	0.2417	-0.123343		0.108777	-0.0723737	-0.0808633	0.10593	-0.0310861	-0.017493	-0.0878082		0.138211	0.245933	-0.125771	-0.104876	-0.0215432	-0.00176856	-0.0777296		0.354645	0.6004	0.786214		-0.0754817	0.136898	-0.135101	0.0935277	-0.123807	0.123098
-1.92469	0.00764448	-0.0692455	-0.0171825	0.412813	-0.0359532	0.188464	-0.0938841		0.070534	-0.0925564	-0.0808574	0.15229	-0.00979914	-0.0284281	-0.114371		0.184336	0.178487	-0.131593	-0.113906	0.0676457	0.0254231	-0.0322569		0.44955	0.87013	0.354645		-0.0911841	0.121364	-0.132476	0.0881555	-0.10598	0.160036
-1.86192	-0.0356756	-0.100648	0.000785857	0.357509	-0.100595	0.14495	-0.038481		0.0558696	-0.129756	-0.107323	0.206882	-0.0150918	-0.0291001	-0.179452		0.184021	0.0903671	-0.088717	-0.126368	0.126163	0.027616	-0.0442657		0.488511	0.515485	0.163836		-0.115512	0.103711	-0.140781	0.0659127	-0.0998369	0.156667
-1.79916	-0.0832039	-0.155201	0.0172465	0.207419	-0.151602	0.115876	-0.00172184		0.0762829	-0.153146	-0.142767	0.230113	-0.0468305	-0.00488734	-0.228231		0.140311	0.0134429	-0.0493016	-0.147191	0.11025	0.0172498	-0.100297		0.67033	0.438561	0.223776		-0.140436	0.0836411	-0.157699	0.0495512	-0.115891	0.132028
-1.7364	-0.113538	-0.204965	0.00367152	0.0568705	-0.179268	0.0947994	-0.00778084		0.110221	-0.144513	-0.154596	0.190644	-0.0794286	0.036908	-0.227762		0.0714061	-0.0238629	-0.0635922	-0.146558	0.044543	0.015441	-0.155767		0.87013	0.506494	0.621379		-0.172523	0.0553137	-0.162473	0.0526465	-0.142613	0.100923
-1.67364	-0.111188	-0.211298	-0.0489682	-0.00518915	-0.186053	0.0728989	-0.0419889		0.128663	-0.115033	-0.137453	0.0853089	-0.0858419	0.0652147	-0.19808		0.0045472	-0.0201331	-0.131901	-0.10077	-0.0121885	0.0316522	-0.176912		0.436563	0.513487	0.883117		-0.192312	0.0253638	-0.158045	0.0670992	-0.17294	0.0841817
-1.61088	-0.078155	-0.165959	-0.113303	0.0283185	-0.172839	0.0467449	-0.0704481		0.123579	-0.0942277	-0.122597	-0.0520417	-0.06094	0.0506951	-0.182885		-0.0346511	-0.00578029	-0.205281	-0.0361631	-0.0211807	0.0557191	-0.166993		0.337662	0.541459	0.765235		-0.205218	0.0164424	-0.156799	0.068452	-0.179848	0.0663346
-1.54812	-0.0316117	-0.107178	-0.143271	0.083943	-0.140423	0.0209746	-0.0720593		0.110399	-0.101084	-0.143692	-0.163551	-0.0236729	-0.00552682	-0.196318		-0.0364384	-0.0232438	-0.230931	-0.0129088	0.0118272	0.0691223	-0.154288		0.643357	0.641359	0.967033		-0.204695	0.035771	-0.171445	0.0524676	-0.184922	0.0741433
-1.48536	0.00850545	-0.0890463	-0.112903	0.0859067	-0.103997	0.00598473	-0.0512221		0.107447	-0.12497	-0.199325	-0.202091	0.000752361	-0.0695867	-0.208629		-0.0141853	-0.0951377	-0.195672	-0.0587186	0.0527533	0.0634792	-0.160975		0.679321	0.939061	0.663337		-0.180293	0.0624268	-0.187815	0.033407	-0.186463	0.079838
-1.42259	0.0304982	-0.131564	-0.0420403	0.03138	-0.0941754	0.0118278	-0.0255163		0.118775	-0.135775	-0.254986	-0.165875	-0.000567096	-0.102797	-0.186347		0.00601618	-0.203895	-0.12829	-0.12981	0.0701498	0.0475698	-0.187475		0.346653	0.744256	0.57043		-0.1607	0.0827222	-0.199548	0.0281419	-0.185736	0.0757739
-1.35983	0.0345066	-0.201988	0.015246	-0.0135427	-0.130498	0.0402097	-0.00793333		0.13732	-0.114714	-0.2807	-0.102064	-0.0248562	-0.0930981	-0.13825		0.00813388	-0.301001	-0.0659949	-0.151728	0.0536141	0.0363464	-0.222337		0.371628	0.614386	0.763237		-0.156315	0.088556	-0.193834	0.0360912	-0.199093	0.062197
-1.29707	0.0310375	-0.247295	0.0122201	0.00945212	-0.190996	0.0794638	-0.00206288		0.158479	-0.0757631	-0.280684	-0.0703541	-0.0629548	-0.0605232	-0.112108		0.000266834	-0.342602	-0.0227859	-0.0999412	0.0144591	0.033729	-0.257052		0.63037	0.717283	0.963037		-0.180614	0.0777761	-0.183729	0.0436932	-0.222628	0.0657713
-1.23431	0.0368406	-0.244046	-0.0525169	0.0834163	-0.217507	0.108827	-0.00858333		0.184166	-0.0548415	-0.283052	-0.0949913	-0.106986	-0.0342946	-0.144803		0.00457513	-0.325061	0.0120626	-0.0290952	-0.0223544	0.026888	-0.285988		0.758242	0.934066	0.84016		-0.184343	0.0706925	-0.187682	0.0453253	-0.224156	0.0895447
-1.17155	0.0662191	-0.214205	-0.132931	0.128427	-0.164357	0.112658	-0.0290198		0.214058	-0.0751153	-0.30447	-0.148001	-0.149	-0.0267637	-0.221851		0.0326177	-0.28965	0.0522455	-0.0146512	-0.0301178	-0.00235451	-0.29837		0.4995	0.982018	0.52048		-0.19764	0.0642476	-0.211745	0.0244318	-0.209456	0.0916034
-1.10879	0.118738	-0.193604	-0.172771	0.079857	-0.0480318	0.0948577	-0.0607153		0.239927	-0.122268	-0.331541	-0.178605	-0.177727	-0.0289308	-0.29041		0.0725189	-0.289201	0.0971761	-0.0708089	0.00361779	-0.0605558	-0.282723		0.171828	0.871129	0.318681		-0.192732	0.096334	-0.240369	0.00165746	-0.21281	0.105999
-1.04603	0.174013	-0.19122	-0.151651	-0.0481603	0.0552418	0.0797715	-0.0918513		0.254836	-0.156254	-0.338524	-0.159696	-0.183218	-0.02672	-0.309317		0.101836	-0.344115	0.135537	-0.137185	0.0640052	-0.136552	-0.244588		0.0709291	0.612388	0.304695		-0.181875	0.130576	-0.254654	0.0065405	-0.227381	0.107701
-0.983264	0.205162	-0.184579	-0.100142	-0.175777	0.069894	0.0956591	-0.106902		0.266935	-0.150341	-0.318209	-0.107448	-0.16663	-0.0163184	-0.281524		0.110588	-0.427732	0.160222	-0.148657	0.113964	-0.21112	-0.212556		0.0969031	0.424575	0.509491		-0.166601	0.144165	-0.245953	0.0375283	-0.246059	0.108049
-0.920502	0.205303	-0.152571	-0.0698981	-0.22839	-0.0140979	0.153038	-0.0993006		0.297474	-0.118967	-0.289406	-0.0595827	-0.142049	-0.00265926	-0.239456		0.106972	-0.495074	0.174873	-0.107736	0.121647	-0.2718	-0.214812		0.265734	0.366633	0.931069		-0.171928	0.146524	-0.212541	0.0796907	-0.259647	0.0969637
-0.857741	0.201728	-0.103728	-0.0857076	-0.192903	-0.133352	0.236388	-0.0771237		0.359976	-0.104577	-0.273805	-0.0391334	-0.124654	0.0121911	-0.207909		0.0993651	-0.526484	0.185438	-0.0771445	0.0897579	-0.318407	-0.245814		0.614386	0.336663	0.649351		-0.189561	0.147784	-0.187796	0.111637	-0.269027	0.0897646
-0.794979	0.236972	-0.0655427	-0.124352	-0.11151	-0.207274	0.316154	-0.0540315		0.442507	-0.134262	-0.270921	-0.0403831	-0.117377	0.0326403	-0.188135		0.078171	-0.541733	0.188935	-0.10327	0.0568659	-0.355348	-0.263698		0.814186	0.215784	0.35964		-0.190615	0.15908	-0.182853	0.140144	-0.295052	0.0824809
-0.732218	0.328215	-0.0486885	-0.140483	-0.0335346	-0.203712	0.369701	-0.0349412		0.515417	-0.189263	-0.260984	-0.0454756	-0.113007	0.0598354	-0.173682		0.0230905	-0.570275	0.17473	-0.160289	0.0647479	-0.380433	-0.230541		0.677323	0.0799201	0.201798		-0.177612	0.182516	-0.173863	0.162176	-0.321157	0.0717483
-0.669456	0.444371	-0.0307934	-0.113564	0.0195986	-0.154	0.393255	-0.0132511		0.5591	-0.219594	-0.232223	-0.0482483	-0.110921	0.0829436	-0.168887		-0.0692795	-0.610299	0.139115	-0.17875	0.121483	-0.38284	-0.156638		0.394605	0.018981	0.137862		-0.127963	0.22947	-0.168152	0.17982	-0.337862	0.0715762
-0.606695	0.528624	0.0191737	-0.0681774	0.0504732	-0.111153	0.397662	0.0162643		0.581767	-0.190877	-0.200429	-0.0597428	-0.126916	0.08681	-0.183042		-0.170411	-0.622945	0.0982196	-0.123908	0.196954	-0.352927	-0.097619		0.192807	0.00699301	0.121878		-0.0787564	0.277814	-0.16839	0.185026	-0.325054	0.0731003
-0.543933	0.548868	0.104282	-0.0470802	0.0656559	-0.0995737	0.39637	0.0441545		0.606545	-0.116856	-0.196966	-0.0939445	-0.178495	0.0711206	-0.20979		-0.239856	-0.571348	0.0835356	-0.033761	0.25432	-0.294256	-0.1008		0.114885	0.003996	0.194805		-0.0540837	0.308469	-0.173245	0.193291	-0.314657	0.091669
-0.481172	0.526344	0.194721	-0.0661803	0.0709239	-0.104666	0.398047	0.0509898		0.641945	-0.0448691	-0.236281	-0.151631	-0.256908	0.0589641	-0.222931		-0.262915	-0.464777	0.119431	0.0233599	0.28284	-0.225436	-0.155155		0.0889111	0.015984	0.401598		-0.0611641	0.314909	-0.192591	0.180615	-0.303181	0.118695
-0.41841	0.512232	0.260987	-0.100232	0.0796543	-0.102686	0.407166	0.0291414		0.670096	-0.00964324	-0.296644	-0.21602	-0.319072	0.0807565	-0.199059		-0.264911	-0.35976	0.199404	0.0188939	0.297375	-0.168768	-0.200081		0.0659341	0.037962	0.7003		-0.0808675	0.312086	-0.216744	0.164766	-0.294865	0.15864
-0.355649	0.535972	0.306085	-0.114536	0.108339	-0.0909496	0.426387	-0.00129176		0.667983	-0.00311756	-0.334774	-0.258565	-0.317426	0.146001	-0.142154		-0.283698	-0.313492	0.282269	-0.017449	0.308898	-0.135088	-0.186338		0.0629371	0.0599401	0.815185		-0.0784549	0.320164	-0.207355	0.171771	-0.277026	0.169486
-0.292887	0.579771	0.359348	-0.10635	0.153634	-0.0869719	0.455559	-0.0041499		0.638748	0.00999532	-0.321377	-0.248314	-0.244805	0.230926	-0.0810692		-0.32826	-0.334434	0.315856	-0.0436583	0.303796	-0.117923	-0.125365		0.0859141	0.043956	0.619381		-0.0499917	0.34735	-0.183057	0.201884	-0.267358	0.181793
-0.230126	0.605661	0.441674	-0.107695	0.181441	-0.105099	0.489807	0.0391763		0.616843	0.0507139	-0.265131	-0.164708	-0.148878	0.296184	-0.0428397		-0.368677	-0.377695	0.273518	-0.0531429	0.258881	-0.101534	-0.075355		0.195804	0.014985	0.230769		-0.0278827	0.360703	-0.138414	0.248458	-0.26964	0.151823
-0.167364	0.60405	0.546944	-0.144581	0.155346	-0.141767	0.522031	0.106703		0.639042	0.105925	-0.204838	-0.014194	-0.0959903	0.319294	-0.0322745		-0.369272	-0.386478	0.175481	-0.0667506	0.176037	-0.0745084	-0.0811113		0.3996	0.00599401	0.0549451		-0.0113017	0.361204	-0.0904311	0.286812	-0.303059	0.134849
-0.104603	0.609523	0.663395	-0.199125	0.0834721	-0.183527	0.549325	0.151523		0.712029	0.153089	-0.178552	0.160545	-0.115097	0.312317	-0.0375727		-0.328165	-0.335816	0.0761783	-0.0862599	0.0951696	-0.0355291	-0.132698		0.652348	0.00799201	0.01998		-0.00806791	0.35318	-0.0803864	0.319704	-0.329485	0.113351
-0.041841	0.666895	0.806301	-0.22118	0.0280282	-0.22217	0.576706	0.147831		0.812174	0.201349	-0.196454	0.295724	-0.175313	0.31044	-0.0482839		-0.277781	-0.238047	0.025787	-0.0754135	0.0663908	0.0138896	-0.182748		0.689311	0.00699301	0.018981		0.00216826	0.37977	-0.058562	0.333827	-0.315173	0.119291
0.0209205	0.786565	1.01442	-0.181316	0.0531887	-0.256623	0.613705	0.124761		0.917541	0.299205	-0.237614	0.345218	-0.218598	0.344344	-0.0594944		-0.24377	-0.11353	0.0371469	0.00236948	0.107243	0.0809021	-0.19553		0.48951	0.003996	0.033966		0.0289648	0.434742	-0.0429126	0.347543	-0.284817	0.158949
0.083682	0.939617	1.30413	-0.107439	0.158473	-0.283724	0.667155	0.150922		1.03561	0.492402	-0.269384	0.313842	-0.21426	0.420782	-0.0595651		-0.207884	0.0353415	0.0854936	0.135378	0.187852	0.182265	-0.17014		0.307692	0.001998	0.0609391		0.0999907	0.529996	0.0100263	0.407438	-0.212554	0.247804
0.146444	1.09721	1.62998	-0.0609016	0.27275	-0.296444	0.736767	0.277703		1.19386	0.77077	-0.271626	0.251951	-0.181664	0.523232	-0.0252474		-0.119444	0.219203	0.13838	0.267597	0.257739	0.329299	-0.117924		0.226773	0.003996	0.0819181		0.193556	0.631389	0.0995995	0.490963	-0.126088	0.358332
0.209205	1.26797	1.90233	-0.0732787	0.325166	-0.295685	0.81526	0.492196		1.40101	1.06064	-0.247537	0.212163	-0.162564	0.625123	0.0597644		0.0509534	0.436665	0.184323	0.355457	0.286013	0.508559	-0.0315327		0.280719	0.00799201	0.121878		0.284273	0.720772	0.200819	0.600795	-0.010541	0.504027
0.271967	1.48882	2.05356	-0.110512	0.321728	-0.298122	0.889627	0.72612		1.61981	1.27816	-0.215626	0.208738	-0.176295	0.702146	0.180644		0.268883	0.660761	0.231085	0.410718	0.27727	0.677816	0.109582		0.353646	0.041958	0.232767		0.36282	0.813662	0.286925	0.702928	0.117934	0.618811
0.334728	1.77734	2.08995	-0.104613	0.341104	-0.322451	0.942144	0.91534		1.78208	1.39782	-0.191989	0.219475	-0.204566	0.738613	0.294369		0.4504	0.851387	0.278012	0.47674	0.255126	0.786005	0.302002		0.291708	0.0809191	0.44955		0.441372	0.888036	0.337399	0.760952	0.212048	0.733563
0.39749	2.09696	2.07834	-0.0213291	0.447048	-0.364374	0.95524	1.05446		1.83472	1.47158	-0.178228	0.224454	-0.216699	0.730969	0.364689		0.523596	0.977992	0.297325	0.565848	0.237767	0.804325	0.498353		0.0959041	0.0589411	0.696304		0.529042	0.987718	0.352449	0.798314	0.271718	0.804603
0.460251	2.3736	2.08328	0.106585	0.609736	-0.391544	0.92263	1.19368		1.77546	1.57818	-0.164247	0.234652	-0.202955	0.689638	0.394365		0.481719	1.02944	0.252106	0.635336	0.230679	0.743993	0.636643		0.016983	0.002997	0.674326		0.603551	1.08513	0.367443	0.810573	0.295992	0.795853
0.523013	2.54817	2.11875	0.213859	0.72548	-0.372306	0.859164	1.38077		1.64914	1.74741	-0.141885	0.275622	-0.179912	0.635223	0.418425		0.381201	1.00778	0.138172	0.635853	0.23602	0.64636	0.692626		0.001998	0.000999001	0.344655		0.675015	1.18231	0.378154	0.827137	0.249054	0.730345
0.585774	2.61411	2.15614	0.266437	0.719819	-0.311708	0.79652	1.60531		1.51317	1.9283	-0.115737	0.345963	-0.167109	0.587649	0.464927		0.29061	0.921023	0.00565536	0.577983	0.259548	0.554544	0.698796		0.000999001	0.000999001	0.0849151		0.729282	1.25455	0.391163	0.840931	0.17812	0.670889
0.648536	2.60843	2.16769	0.287586	0.625516	-0.253381	0.762485	1.80055		1.40438	2.02948	-0.10025	0.404261	-0.165497	0.555854	0.527424		0.239301	0.78481	-0.0693274	0.535697	0.304581	0.49026	0.708822		0.000999001	0.000999001	0.032967		0.764138	1.29703	0.396868	0.851085	0.134144	0.62414
0.711297	2.5727	2.15282	0.323599	0.550287	-0.239552	0.760239	1.90104		1.33047	1.99483	-0.10547	0.408049	-0.161252	0.537954	0.579698		0.208283	0.625053	-0.0431753	0.574541	0.362827	0.451885	0.746235		0.000999001	0.000999001	0.044955		0.779225	1.30173	0.375646	0.830054	0.140245	0.622705
0.774059	2.525	2.12533	0.391343	0.566968	-0.269026	0.768745	1.89965		1.28195	1.84761	-0.12532	0.365199	-0.14593	0.531326	0.61284		0.16259	0.470433	0.0596131	0.679806	0.416857	0.428944	0.791371		0.000999001	0.000999001	0.132867		0.77755	1.31641	0.345229	0.795278	0.161896	0.639256
0.83682	2.4633	2.08962	0.464385	0.642361	-0.298884	0.766328	1.84979		1.24651	1.66838	-0.140342	0.335954	-0.126098	0.539964	0.647641		0.0889804	0.339459	0.167406	0.764319	0.453593	0.415529	0.814925		0.000999001	0.000999001	0.232767		0.778288	1.29928	0.310647	0.767992	0.146748	0.658073
0.899582	2.3852	2.04114	0.50653	0.678116	-0.289285	0.754618	1.81413		1.21486	1.53163	-0.132948	0.374022	-0.11194	0.568886	0.70559		0.00565555	0.238285	0.218709	0.750623	0.473789	0.411811	0.814837		0.000999001	0.000999001	0.214785		0.762161	1.27597	0.283855	0.766632	0.135342	0.650633
0.962343	2.29811	1.98694	0.50955	0.61576	-0.242826	0.757508	1.81236		1.18098	1.45818	-0.101243	0.465532	-0.102078	0.611804	0.774018		-0.0580921	0.172834	0.202664	0.643419	0.487366	0.418512	0.815028		0.000999001	0.000999001	0.115884		0.744494	1.24685	0.292036	0.777775	0.105801	0.615853
1.0251	2.21305	1.9502	0.493504	0.492789	-0.195859	0.795363	1.81619		1.14282	1.41894	-0.0595362	0.534258	-0.0859753	0.649426	0.811332		-0.0882166	0.156628	0.150891	0.521651	0.501288	0.435238	0.833669		0.001998	0.000999001	0.0659341		0.72031	1.24272	0.314821	0.792087	0.107604	0.593374
1.08787	2.13564	1.94229	0.476311	0.396321	-0.173661	0.861792	1.78915		1.10303	1.37563	-0.0268505	0.514146	-0.0616349	0.66579	0.791688		-0.0944249	0.196	0.0989596	0.465791	0.513701	0.464498	0.863867		0.001998	0.000999001	0.0759241		0.707697	1.22525	0.309566	0.798862	0.0860902	0.608341
1.15063	2.06581	1.9332	0.454184	0.373825	-0.162248	0.928266	1.72626		1.06603	1.31476	-0.0147963	0.416601	-0.0451601	0.667918	0.738964		-0.0972541	0.263747	0.0607358	0.497024	0.518003	0.512544	0.8898		0.000999001	0.000999001	0.158841		0.690338	1.21152	0.293115	0.790724	0.0924914	0.635585
1.21339	2.00204	1.86446	0.416379	0.399546	-0.129419	0.971918	1.65579		1.03282	1.24669	-0.0235605	0.322033	-0.0569231	0.685565	0.707888		-0.108567	0.296705	0.0352813	0.579669	0.508395	0.580914	0.913823		0.000999001	0.000999001	0.318681		0.679847	1.18865	0.267465	0.766734	0.120039	0.658489
1.27615	1.94083	1.70372	0.372036	0.422697	-0.06937	0.996834	1.6088		0.999729	1.18082	-0.0448423	0.303282	-0.09744	0.745943	0.729359		-0.122677	0.236106	0.0257051	0.665978	0.480233	0.656505	0.955616		0.000999001	0.000999001	0.47952		0.652033	1.16155	0.250158	0.732134	0.133524	0.682972
1.33891	1.87271	1.48704	0.350917	0.429265	-0.0169364	1.02686	1.59255		0.963226	1.11002	-0.0657712	0.359384	-0.140476	0.84573	0.779484		-0.123853	0.0819694	0.039942	0.72847	0.429585	0.714846	1.02111		0.001998	0.000999001	0.61039		0.621514	1.13943	0.252324	0.708786	0.149222	0.696573
1.40167	1.7855	1.29894	0.372789	0.442303	-0.0126369	1.07904	1.59191		0.924754	1.02201	-0.072166	0.425578	-0.153573	0.948877	0.807327		-0.102317	-0.0934431	0.0727927	0.757815	0.358987	0.739358	1.08074		0.000999001	0.000999001	0.668332		0.598836	1.11857	0.245129	0.703509	0.148124	0.697692
1.46444	1.67723	1.20313	0.421122	0.467997	-0.0575666	1.14621	1.58921		0.88884	0.922251	-0.0543287	0.444346	-0.126399	1.01463	0.791231		-0.0651138	-0.196339	0.0974081	0.751216	0.285274	0.739733	1.0899		0.000999001	0.000999001	0.661339		0.566113	1.08429	0.236795	0.700071	0.124604	0.69259
1.5272	1.56543	1.19135	0.455092	0.46389	-0.110154	1.20439	1.57648		0.856707	0.838904	-0.0152056	0.420749	-0.0786228	1.02982	0.761935		-0.0330585	-0.186199	0.085172	0.717005	0.236415	0.748287	1.03441		0.000999001	0.000999001	0.595405		0.547123	1.07229	0.24024	0.708311	0.128552	0.680912
1.58996	1.47849	1.20061	0.450356	0.37831	-0.129363	1.23329	1.55054		0.82456	0.80033	0.026964	0.407349	-0.0407041	1.01502	0.768164		-0.0262096	-0.106031	0.0360283	0.683666	0.233356	0.792776	0.950618		0.003996	0.000999001	0.534466		0.538423	1.04864	0.241256	0.720385	0.125334	0.659158
1.65272	1.43325	1.17872	0.424631	0.219991	-0.115982	1.22831	1.505		0.790276	0.807029	0.0491339	0.441551	-0.0282725	1.00086	0.823885		-0.0496031	-0.0396892	-0.0169179	0.684421	0.272077	0.869257	0.894156		0.00999001	0.000999001	0.513487		0.505267	1.0256	0.239033	0.731402	0.140498	0.663922
1.71548	1.41962	1.12947	0.419423	0.0728295	-0.106369	1.198	1.4346		0.760323	0.82828	0.0424382	0.505571	-0.0346477	1.00009	0.894491		-0.0907472	-0.0379997	-0.038589	0.720495	0.325709	0.941746	0.888555		0.017982	0.00699301	0.546454		0.481283	1.01219	0.226419	0.736559	0.137703	0.681824
1.77824	1.40756	1.09512	0.456983	0.0274885	-0.127545	1.1585	1.34683		0.746317	0.828824	0.0229419	0.549059	-0.0447264	1.00305	0.933756		-0.130351	-0.083344	-0.0268595	0.745253	0.36685	0.971024	0.907853		0.027972	0.011988	0.614386		0.480646	0.983541	0.248357	0.743917	0.136163	0.700246
1.841	1.36911	1.1024	0.517676	0.0956647	-0.165526	1.13334	1.26327		0.752672	0.799215	0.0211642	0.544875	-0.0521547	0.997814	0.928299		-0.156454	-0.120392	-0.0116701	0.69992	0.387102	0.946677	0.910146		0.030969	0.014985	0.581419		0.481749	0.987797	0.228016	0.740732	0.115665	0.698437
1.90377	1.29444	1.13344	0.559488	0.196687	-0.181652	1.15017	1.20405		0.769347	0.759274	0.0566507	0.516469	-0.0622406	0.990594	0.902704		-0.170107	-0.114831	-0.0180246	0.573823	0.393165	0.893386	0.883148		0.033966	0.00699301	0.433566		0.472833	1.00014	0.222145	0.72283	0.0769658	0.682081
1.96653	1.19144	1.14901	0.556783	0.231801	-0.156309	1.22376	1.17148		0.779822	0.732502	0.119819	0.510632	-0.0812498	1.0034	0.886096		-0.179794	-0.0804608	-0.0348214	0.425672	0.386699	0.847775	0.851843		0.037962	0.002997	0.275724		0.470764	1.00299	0.220756	0.74209	0.0568238	0.654373
2.02929	1.07689	1.13267	0.519155	0.170852	-0.110363	1.33472	1.15212		0.776795	0.720032	0.178262	0.548291	-0.106622	1.05114	0.882218		-0.192326	-0.0549563	-0.0265461	0.336716	0.356234	0.829481	0.843187		0.0649351	0.003996	0.195804		0.451227	0.990336	0.242481	0.752777	0.0389505	0.626291
2.09205	0.972011	1.10561	0.477076	0.0668601	-0.0830434	1.43069	1.13572		0.767677	0.702257	0.202351	0.604777	-0.128699	1.12186	0.874903		-0.209105	-0.0578257	0.0240745	0.338743	0.296067	0.832308	0.851054		0.11988	0.004995	0.178821		0.430605	0.964438	0.245835	0.761206	0.046439	0.609754
2.15481	0.902104	1.10066	0.455482	-0.00801904	-0.0944805	1.46215	1.12937		0.76288	0.665268	0.187452	0.635513	-0.140413	1.18028	0.856198		-0.22859	-0.0747975	0.0916248	0.388831	0.231871	0.838517	0.842036		0.144855	0.00699301	0.190809		0.416828	0.943246	0.241081	0.751398	0.0518175	0.605892
2.21757	0.889144	1.12977	0.461626	-0.0335974	-0.1339	1.42675	1.15016		0.760666	0.621619	0.154611	0.616773	-0.14366	1.19221	0.839895		-0.248889	-0.0772767	0.131907	0.414194	0.217211	0.837193	0.794575		0.135864	0.00599401	0.218781		0.401307	0.920689	0.231458	0.743267	0.0593815	0.600543
2.28033	0.935522	1.1809	0.490477	-0.0501096	-0.179648	1.37804	1.2055		0.747609	0.60122	0.132204	0.561887	-0.146264	1.14888	0.844829		-0.266887	-0.0490906	0.128878	0.378178	0.292234	0.828405	0.7265		0.0819181	0.00599401	0.251748		0.413262	0.941112	0.22534	0.730354	0.0427268	0.599626
2.3431	1.01409	1.24138	0.53216	-0.105176	-0.220493	1.38365	1.28482		0.715538	0.62134	0.13654	0.503418	-0.153545	1.07198	0.870276		-0.277486	0.00642781	0.111105	0.302082	0.439467	0.814081	0.680453		0.032967	0.003996	0.312687		0.443717	0.979806	0.201695	0.712598	0.0332076	0.604769
2.40586	1.08088	1.3153	0.572446	-0.200181	-0.252785	1.46882	1.3723		0.674768	0.667926	0.166047	0.464321	-0.162813	0.997421	0.894132		-0.27759	0.0774715	0.117744	0.231025	0.583112	0.790661	0.683791		0.014985	0.003996	0.396603		0.469755	1.01311	0.193967	0.691827	0.0365658	0.630895
2.46862	1.10563	1.41473	0.594335	-0.288017	-0.264538	1.59971	1.46435		0.645733	0.708289	0.208524	0.444712	-0.165434	0.952021	0.896048		-0.271843	0.153338	0.152477	0.190717	0.640543	0.753215	0.725333		0.004995	0.003996	0.465534		0.498942	1.05703	0.189899	0.695977	0.0326052	0.66482
2.53138	1.09421	1.53989	0.58945	-0.31697	-0.236379	1.72158	1.56906		0.636109	0.721481	0.251151	0.430064	-0.154571	0.939402	0.87861		-0.271267	0.223266	0.179536	0.180886	0.583993	0.704856	0.769818		0.002997	0.003996	0.413586		0.542034	1.09836	0.188548	0.706944	0.0294431	0.672461
2.59414	1.08201	1.67571	0.570468	-0.274226	-0.165809	1.81142	1.68729		0.629456	0.714782	0.285828	0.407421	-0.132527	0.942865	0.863585		-0.282104	0.273961	0.168455	0.199744	0.458799	0.659	0.790369		0.000999001	0.001998	0.298701		0.581172	1.15757	0.19504	0.715807	0.0182962	0.650842
2.6569	1.10476	1.80905	0.566099	-0.192137	-0.0855266	1.89143	1.79893		0.600419	0.711309	0.310259	0.374719	-0.111536	0.940724	0.869257		-0.295333	0.295719	0.1363	0.258256	0.344397	0.631355	0.785446		0.000999001	0.001998	0.212787		0.641345	1.24027	0.2011	0.716998	0.014771	0.631382
2.71967	1.17407	1.94273	0.596268	-0.119414	-0.0460682	1.99365	1.8741		0.541679	0.724733	0.327451	0.33859	-0.105941	0.922306	0.893537		-0.290948	0.291226	0.135436	0.363398	0.295265	0.630577	0.769925		0.000999001	0.000999001	0.251748		0.703126	1.31714	0.199238	0.70995	0.0025985	0.637997
2.78243	1.27673	2.08601	0.650692	-0.0856336	-0.07222	2.11875	1.90012		0.473216	0.74786	0.343192	0.30527	-0.120655	0.893229	0.91704		-0.257115	0.273883	0.195354	0.494535	0.311847	0.656387	0.758199		0.000999001	0.000999001	0.447552		0.757226	1.37256	0.190242	0.690743	0.0405352	0.66522
2.84519	1.39167	2.23164	0.696128	-0.0844962	-0.136451	2.23428	1.89472		0.423361	0.762958	0.360443	0.272654	-0.145883	0.866642	0.918074		-0.206034	0.25567	0.281959	0.60774	0.35802	0.703429	0.758243		0.000999001	0.000999001	0.783217		0.77835	1.41216	0.185952	0.67643	0.0766964	0.726859
2.90795	1.50389	2.34901	0.708649	-0.0832595	-0.179554	2.31096	1.88958		0.402552	0.757723	0.374374	0.230829	-0.164821	0.848292	0.884411		-0.167577	0.239824	0.323226	0.667664	0.399347	0.763003	0.774596		0.000999001	0.000999001	0.918082		0.810739	1.46642	0.176036	0.647703	0.107432	0.771533
2.97071	1.60481	2.40674	0.698349	-0.0501081	-0.161199	2.35313	1.90053		0.398486	0.729489	0.374736	0.173216	-0.169282	0.829234	0.81771		-0.16305	0.22796	0.278985	0.672342	0.425536	0.821025	0.806333		0.000999001	0.000999001	0.711289		0.83977	1.51468	0.154373	0.622421	0.124251	0.782446
3.03347	1.68649	2.40347	0.699274	0.0181521	-0.0930268	2.38914	1.91645		0.396156	0.679579	0.35618	0.110157	-0.168326	0.793998	0.735322		-0.183715	0.229999	0.182406	0.646105	0.444602	0.859659	0.838625		0.000999001	0.000999001	0.575425		0.875758	1.54423	0.127798	0.598975	0.125087	0.761762
3.09623	1.74118	2.37304	0.733832	0.0885675	-0.0258227	2.43553	1.91778		0.397433	0.612523	0.326844	0.0694064	-0.179437	0.737575	0.66881		-0.196707	0.25799	0.10818	0.614407	0.464688	0.867945	0.843793		0.000999001	0.000999001	0.472527		0.911513	1.59127	0.100684	0.564205	0.121584	0.7359
3.159	1.76611	2.35479	0.788587	0.115171	-0.00715916	2.47795	1.90274		0.41651	0.544179	0.304026	0.0757038	-0.209286	0.67481	0.651233		-0.174333	0.305537	0.0994162	0.59091	0.484727	0.85381	0.802207		0.000999001	0.000999001	0.35964		0.930909	1.60117	0.0773469	0.540364	0.115829	0.719576
3.22176	1.76493	2.35562	0.826373	0.0789176	-0.0488105	2.48991	1.89076		0.457505	0.503974	0.298232	0.123648	-0.244086	0.631728	0.693808		-0.118613	0.339193	0.128672	0.58288	0.498917	0.842722	0.72744		0.000999001	0.000999001	0.321678		0.930235	1.60061	0.0748044	0.544909	0.120984	0.74858
3.28452	1.74327	2.34041	0.821407	0.0100399	-0.125934	2.4657	1.89905		0.50282	0.51745	0.301209	0.172672	-0.261707	0.625627	0.770566		-0.0573346	0.321822	0.131548	0.593028	0.504507	0.858946	0.665942		0.000999001	0.000999001	0.378621		0.898578	1.57803	0.0971252	0.559257	0.107241	0.754809
3.34728	1.70596	2.26145	0.781522	-0.0325549	-0.19877	2.42824	1.91912		0.528255	0.579713	0.292633	0.177746	-0.25456	0.652269	0.831518		-0.0168685	0.251288	0.0745961	0.605884	0.502884	0.90456	0.662163		0.000999001	0.000999001	0.487512		0.857879	1.53993	0.111334	0.592376	0.101177	0.757425
3.41004	1.66169	2.10254	0.737745	-0.0115391	-0.235953	2.40372	1.92128		0.527898	0.649141	0.2617	0.13247	-0.238609	0.69173	0.839698		-6.571e-06	0.172625	-0.0142083	0.581358	0.494855	0.956996	0.717567		0.000999001	0.000999001	0.54046		0.817129	1.49381	0.111703	0.602283	0.0959079	0.751603
3.4728	1.62758	1.90039	0.715704	0.0547588	-0.228795	2.39362	1.8839		0.51862	0.676392	0.222367	0.080645	-0.236958	0.726036	0.799503		0.00983032	0.143263	-0.0805227	0.484058	0.477797	0.988807	0.784481		0.000999001	0.000999001	0.517483		0.785341	1.44958	0.0857952	0.593487	0.103941	0.74423
3.53556	1.62211	1.72497	0.717963	0.108977	-0.195724	2.37601	1.8169		0.517778	0.646505	0.20444	0.0774343	-0.254224	0.750958	0.747514		0.0252242	0.181161	-0.101721	0.333551	0.448879	0.990735	0.805082		0.000999001	0.000999001	0.508492		0.777319	1.41723	0.0630748	0.589708	0.106011	0.710472
3.59833	1.64795	1.63245	0.729546	0.107585	-0.173972	2.33295	1.75362		0.520963	0.592794	0.226125	0.133245	-0.269722	0.772329	0.71409		0.0386721	0.248784	-0.104756	0.217895	0.41101	0.97573	0.7611		0.000999001	0.000999001	0.583417		0.76831	1.40687	0.0638203	0.581572	0.0796764	0.698936
3.66109	1.68309	1.62522	0.734205	0.0584998	-0.195399	2.27125	1.71865		0.508602	0.56576	0.273809	0.197849	-0.258282	0.794352	0.695584		0.0304796	0.291425	-0.12861	0.233984	0.374902	0.961971	0.687821		0.000999001	0.000999001	0.76024		0.753492	1.38774	0.092016	0.577982	0.0542846	0.682737
3.72385	1.69481	1.64883	0.724002	0.00741988	-0.258003	2.21342	1.70453		0.476102	0.585991	0.310011	0.2066	-0.21721	0.814331	0.666203		-0.00924006	0.290801	-0.176767	0.396178	0.353754	0.954691	0.640233		0.000999001	0.000999001	0.917083		0.740919	1.3583	0.109219	0.596004	0.0458956	0.680173
3.78661	1.6669	1.63032	0.699137	-0.0104057	-0.319783	2.1713	1.68088		0.451245	0.627959	0.304011	0.146183	-0.170144	0.828365	0.61484		-0.0685723	0.27789	-0.212178	0.604571	0.353254	0.945828	0.644648		0.000999001	0.000999001	0.901099		0.702271	1.31988	0.113667	0.607591	0.0433773	0.673558
3.84937	1.61281	1.53148	0.666158	-0.00261305	-0.330242	2.13322	1.62647		0.47307	0.650315	0.25761	0.0722287	-0.143319	0.838537	0.563932		-0.123751	0.293191	-0.197338	0.718244	0.364498	0.928827	0.679919		0.000999001	0.000999001	0.832168		0.676221	1.26842	0.103086	0.609092	0.0620886	0.693354
3.91213	1.56	1.37671	0.637706	-0.00613478	-0.27747	2.07807	1.55191		0.549921	0.639727	0.202932	0.0571292	-0.139964	0.850886	0.547499		-0.159247	0.339804	-0.133654	0.67371	0.367463	0.908931	0.700267		0.000999001	0.000999001	0.838162		0.6478	1.22231	0.0860611	0.613373	0.0680074	0.708816
3.9749	1.52137	1.23155	0.627802	-0.0467329	-0.204493	1.99887	1.49071		0.641839	0.621664	0.175492	0.119067	-0.140399	0.865923	0.572318		-0.176733	0.381241	-0.0592885	0.535889	0.345765	0.896458	0.672689		0.000999001	0.000999001	0.998002		0.616827	1.18197	0.103279	0.626019	0.0573352	0.701871
4.03766	1.48435	1.14754	0.640387	-0.11502	-0.172233	1.91012	1.46753		0.690589	0.627739	0.187729	0.205266	-0.12665	0.873879	0.606778		-0.185186	0.384878	-0.0123285	0.432055	0.302459	0.892516	0.59511		0.000999001	0.000999001	0.724276		0.599029	1.17272	0.140465	0.657454	0.0428282	0.676596
4.10042	1.4287	1.12023	0.66183	-0.179145	-0.201014	1.83323	1.47408		0.670604	0.656304	0.224979	0.247276	-0.103357	0.862311	0.612269		-0.184852	0.361311	-0.000523269	0.436034	0.261515	0.886351	0.487791		0.000999001	0.000999001	0.519481		0.567013	1.15655	0.151928	0.673204	0.00873897	0.632871
4.16318	1.35199	1.09821	0.669796	-0.2149	-0.249711	1.77777	1.47481		0.610394	0.670155	0.262844	0.230131	-0.0917025	0.829234	0.584505		-0.163484	0.355845	-0.00492217	0.516086	0.249218	0.869145	0.376576		0.000999001	0.000999001	0.498501		0.544254	1.12074	0.136217	0.676347	-0.00985645	0.619627
4.22594	1.2742	1.03524	0.653374	-0.222192	-0.256211	1.73684	1.4367		0.563472	0.635132	0.286278	0.202066	-0.103963	0.787689	0.559956		-0.109351	0.40222	-0.00469894	0.586906	0.269417	0.847762	0.285116		0.000999001	0.000999001	0.648352		0.499947	1.08325	0.104044	0.649371	-0.00880996	0.637045
4.2887	1.21755	0.935071	0.622596	-0.218819	-0.198712	1.69733	1.35663		0.559127	0.559463	0.293966	0.214997	-0.127873	0.756226	0.579165		-0.027659	0.48863	0.00754682	0.596649	0.296939	0.840276	0.233253		0.001998	0.001998	0.835165		0.477952	1.05918	0.085046	0.63467	0.00886106	0.662403
4.35146	1.18548	0.844753	0.59383	-0.226024	-0.114453	1.65206	1.26332		0.581681	0.492468	0.289953	0.260967	-0.138576	0.744337	0.644075		0.0569666	0.569223	0.0305964	0.554603	0.299313	0.856149	0.229689		0.002997	0.003996	0.965035		0.462402	1.03307	0.0889974	0.62599	0.0237958	0.674697
4.41423	1.16342	0.803221	0.566181	-0.259399	-0.0580585	1.60419	1.19384		0.594165	0.482936	0.276746	0.275208	-0.125113	0.746452	0.71213		0.116257	0.603913	0.0627047	0.485602	0.267952	0.883202	0.260694		0.00799201	0.00699301	0.984016		0.450676	0.99568	0.103583	0.639602	0.052228	0.705224
4.47699	1.13705	0.799266	0.518997	-0.323473	-0.0465212	1.56409	1.16568		0.576421	0.537737	0.258031	0.20529	-0.102919	0.74861	0.73186		0.139753	0.583892	0.0971362	0.3844	0.22639	0.897415	0.292062		0.013986	0.014985	1		0.435743	0.971748	0.113919	0.648789	0.0652807	0.709996
4.53975	1.10495	0.783964	0.439242	-0.405032	-0.0499374	1.54321	1.16695		0.537991	0.619214	0.244239	0.0736775	-0.0994509	0.739888	0.684891		0.143717	0.524343	0.114258	0.234371	0.20414	0.886042	0.293205		0.015984	0.014985	0.949051		0.409867	0.940262	0.0946322	0.636409	0.0341786	0.693632
4.60251	1.07313	0.725325	0.350117	-0.47225	-0.0337653	1.54664	1.17066		0.499226	0.680378	0.249299	-0.0345585	-0.128097	0.718558	0.597416		0.159154	0.444841	0.0912738	0.0647114	0.20221	0.858988	0.265128		0.020979	0.014985	0.894106		0.379315	0.905627	0.0673088	0.618479	-0.00476831	0.652869
4.66527	1.04319	0.646632	0.303695	-0.490895	-0.00115909	1.56696	1.15839		0.468944	0.701737	0.278159	-0.0500312	-0.175622	0.690367	0.516687		0.207298	0.364106	0.029375	-0.0382093	0.189422	0.836312	0.241434		0.017982	0.013986	0.834166		0.360038	0.883213	0.0513492	0.606457	-0.0176727	0.630145
4.72803	1.01223	0.605939	0.336359	-0.451217	0.0125835	1.58612	1.13269		0.444593	0.696594	0.318305	0.0144537	-0.212634	0.663279	0.477934		0.281334	0.30681	-0.0315639	-0.000767872	0.13822	0.826436	0.254974		0.012987	0.012987	0.85015		0.369652	0.902547	0.0518269	0.60231	-0.0322813	0.637722
4.79079	0.983959	0.636973	0.429871	-0.379584	-0.0163061	1.58888	1.1095		0.428403	0.685901	0.347132	0.0759024	-0.214788	0.642953	0.487251		0.349275	0.298501	-0.0373893	0.153641	0.0637099	0.81939	0.301308		0.00699301	0.011988	0.962038		0.382163	0.917403	0.0373266	0.603611	-0.0115837	0.647925
4.85356	0.972642	0.71406	0.521503	-0.317829	-0.0714179	1.57847	1.10006		0.432296	0.672571	0.350388	0.0597154	-0.176872	0.630008	0.525139		0.377281	0.34139	0.0306722	0.305436	0.0203704	0.801098	0.339254		0.00699301	0.017982	0.92008		0.406715	0.939245	0.0498258	0.60017	0.00285111	0.674935
4.91632	0.989865	0.778927	0.557851	-0.2875	-0.115196	1.57585	1.10019		0.460711	0.641487	0.333483	-0.0318965	-0.113137	0.619501	0.560087		0.356403	0.397459	0.129379	0.340128	0.0526216	0.770454	0.332363		0.00999001	0.020979	0.878122		0.420625	0.93872	0.0667671	0.6019	0.0182919	0.685914
4.97908	1.0282	0.801122	0.539865	-0.276457	-0.130667	1.59726	1.0961		0.492663	0.582501	0.313714	-0.125181	-0.0488623	0.604285	0.563296		0.311585	0.40892	0.183067	0.253688	0.146845	0.739167	0.28919		0.00999001	0.015984	0.918082		0.416565	0.950384	0.0718882	0.604705	0.023502	0.686877
5.04184	1.06394	0.807814	0.514208	-0.262746	-0.135369	1.62984	1.07916		0.490831	0.510183	0.301884	-0.143641	-0.00943584	0.581626	0.522462		0.284282	0.34738	0.147595	0.153068	0.236604	0.716399	0.257223		0.00599401	0.00799201	0.981019		0.40945	0.966599	0.059052	0.599495	-0.0143903	0.667345
5.1046	1.07943	0.85146	0.522163	-0.247792	-0.152544	1.63484	1.05429		0.4355	0.458011	0.293713	-0.0724322	-0.00954816	0.557236	0.451066		0.300864	0.244862	0.0488083	0.148986	0.260734	0.698698	0.27351		0.001998	0.00599401	0.942058		0.403538	0.971225	0.0307798	0.585457	-0.0417864	0.654687
5.16736	1.07988	0.949929	0.56107	-0.258668	-0.176875	1.58248	1.03454		0.348954	0.450595	0.280258	0.0374106	-0.0457469	0.540415	0.384398		0.351474	0.170329	-0.0421231	0.249731	0.218515	0.678027	0.324062		0.001998	0.00699301	0.786214		0.408956	0.967546	-0.0111296	0.55819	-0.0405169	0.652048
5.23013	1.08307	1.06207	0.596626	-0.315431	-0.177872	1.48588	1.02889		0.281	0.47981	0.264133	0.118567	-0.0986067	0.532646	0.358513		0.396893	0.169257	-0.0721868	0.361538	0.166911	0.656613	0.357764		0.001998	0.00699301	0.623377		0.41668	0.985671	-0.0251308	0.548268	-0.0120775	0.644064
5.29289	1.09247	1.12354	0.606879	-0.402611	-0.137526	1.3956	1.03561		0.26622	0.50875	0.260574	0.138397	-0.146484	0.521452	0.384293		0.39894	0.223655	-0.047063	0.388147	0.163036	0.647382	0.341775		0.000999001	0.00799201	0.564436		0.412908	0.979118	-0.0262375	0.533627	0.00716788	0.65627
5.35565	1.08622	1.10547	0.605554	-0.481148	-0.076862	1.35459	1.04579		0.294843	0.502756	0.279926	0.109453	-0.181035	0.488735	0.438246		0.350851	0.270909	-0.0128982	0.322634	0.20984	0.656465	0.297644		0.000999001	0.00799201	0.588412		0.392773	0.982836	-0.0246795	0.521454	0.000294306	0.648993
5.41841	1.03858	1.03761	0.619954	-0.529077	-0.0388319	1.35732	1.05069		0.326137	0.461381	0.311663	0.0639787	-0.20921	0.427665	0.480076		0.283818	0.261056	-0.00433987	0.241922	0.25743	0.668683	0.276231		0.000999001	0.004995	0.631369		0.385269	0.964313	-0.0230405	0.506406	-0.0232729	0.63491
5.48117	0.951611	0.977051	0.653412	-0.563422	-0.0465032	1.35671	1.04478		0.329159	0.422008	0.331254	0.0266711	-0.238248	0.350931	0.483131		0.244684	0.196318	-0.0148823	0.221759	0.254115	0.65695	0.297549		0.000999001	0.00599401	0.61039		0.369925	0.946151	-0.046214	0.487616	-0.0347888	0.614867
5.54393	0.860616	0.95814	0.679736	-0.61667	-0.0836964	1.31349	1.02488		0.308334	0.429281	0.325836	0.00842356	-0.259601	0.280561	0.451857		0.262066	0.11962	-0.0162256	0.267235	0.193176	0.609442	0.323633		0.000999001	0.00599401	0.575425		0.354217	0.91315	-0.0828746	0.47073	-0.0173252	0.594567
5.60669	0.8041	0.972572	0.677461	-0.695339	-0.117615	1.2365	0.991521		0.2898	0.495127	0.310735	0.0136678	-0.252128	0.229639	0.413269		0.32642	0.0718812	0.00134807	0.324056	0.112046	0.54518	0.298653		0.000999001	0.00699301	0.605395		0.330347	0.884709	-0.0813903	0.462185	-0.0272161	0.600739
5.66946	0.789388	0.992454	0.662147	-0.769888	-0.134016	1.17121	0.953468		0.287155	0.58445	0.315647	0.0424507	-0.205264	0.195859	0.3933		0.398086	0.063106	0.0154675	0.343337	0.053303	0.498446	0.2149		0.004995	0.00899101	0.784216		0.309367	0.865473	-0.0508921	0.482652	-0.0531377	0.599064
5.73222	0.790461	1.00552	0.674911	-0.807281	-0.143729	1.14958	0.928085		0.285305	0.640446	0.35239	0.0839621	-0.138716	0.173173	0.399594		0.436227	0.0782513	-0.00108159	0.323748	0.0320768	0.486454	0.130417		0.00899101	0.00999001	0.968032		0.295377	0.860713	-0.0217119	0.51761	-0.0686782	0.5786
5.79498	0.779095	1.0253	0.736052	-0.805894	-0.156911	1.15639	0.930766		0.258292	0.628633	0.399052	0.115659	-0.0945283	0.165572	0.421746		0.426755	0.0996337	-0.0457352	0.294612	0.0380536	0.494715	0.113929		0.010989	0.00599401	0.818182		0.293084	0.857406	-0.0164267	0.532801	-0.0910656	0.560226
5.85774	0.754224	1.07016	0.815445	-0.790941	-0.161088	1.14823	0.959518		0.198988	0.562061	0.419917	0.117368	-0.104204	0.183654	0.44288		0.389223	0.118045	-0.0849895	0.274523	0.0579819	0.496312	0.173113		0.004995	0.002997	0.876124		0.319607	0.883488	-0.0289183	0.499101	-0.0889777	0.55861
5.9205	0.738543	1.13733	0.855643	-0.77907	-0.132871	1.10277	0.990682		0.127593	0.487692	0.401449	0.0892492	-0.160627	0.226183	0.450598		0.359144	0.128416	-0.0885484	0.258406	0.0871752	0.48401	0.243783		0.002997	0.001998	0.893107		0.335274	0.910873	-0.0511289	0.463659	-0.0780031	0.569219
5.98326	0.749279	1.19892	0.825826	-0.759705	-0.0700929	1.04339	0.994431		0.0716363	0.449131	0.365514	0.0534269	-0.221949	0.270371	0.441903		0.360772	0.126995	-0.0603352	0.239904	0.121325	0.479544	0.253689		0.000999001	0.001998	0.644356		0.372318	0.906022	-0.0789735	0.426898	-0.0797481	0.570047
6.04603	0.777277	1.22242	0.750139	-0.717933	-0.00429239	1.01273	0.958672		0.0414753	0.45962	0.345298	0.0346062	-0.244056	0.287778	0.423335		0.391885	0.118976	-0.0315228	0.230182	0.148989	0.509513	0.194017		0.000999001	0.001998	0.535465		0.359188	0.904979	-0.0918742	0.422214	-0.0801505	0.586073
6.10879	0.79557	1.19528	0.681731	-0.667209	0.0244465	1.02568	0.898952		0.0273493	0.504606	0.350971	0.0378986	-0.211598	0.272326	0.407157		0.431218	0.123321	-0.0235076	0.24489	0.162233	0.574183	0.123436		0.000999001	0.002997	0.497502		0.346164	0.896425	-0.0816701	0.43388	-0.0553077	0.609442
6.17155	0.784187	1.1329	0.652346	-0.643443	0.00425953	1.05345	0.844155		0.0175449	0.562584	0.363371	0.0455656	-0.141969	0.248339	0.402934		0.459502	0.159151	-0.0226282	0.278643	0.1735	0.643188	0.103054		0.004995	0.012987	0.47952		0.320732	0.87402	-0.0656978	0.466921	-0.02836	0.65332
6.23431	0.743313	1.06717	0.651079	-0.660718	-0.039833	1.05408	0.812003		0.0142153	0.618931	0.360877	0.0344905	-0.0649819	0.245412	0.408528		0.473754	0.222085	0.00416913	0.305995	0.211484	0.682663	0.134675		0.010989	0.0699301	0.430569		0.292428	0.844647	-0.0489148	0.487622	-0.00838926	0.708511
6.29707	0.685782	1.02722	0.65	-0.683884	-0.0730578	1.01409	0.798472		0.0291079	0.662478	0.345372	-0.00416392	-0.00174647	0.265123	0.410025		0.482328	0.27833	0.0687162	0.312935	0.291334	0.685064	0.167694		0.020979	0.177822	0.377622		0.267673	0.813794	-0.0404598	0.492356	0.00829655	0.759845
6.35983	0.624803	1.0265	0.641825	-0.661181	-0.0825132	0.957132	0.78957		0.0664545	0.678223	0.33482	-0.0603881	0.040248	0.27762	0.395072		0.488465	0.29011	0.140526	0.31897	0.389608	0.672035	0.16162		0.031968	0.306693	0.346653		0.232964	0.790793	-0.0263043	0.507584	0.0265061	0.761732
6.42259	0.572637	1.06136	0.645191	-0.587744	-0.0806611	0.914915	0.779655		0.114359	0.653012	0.332116	-0.114818	0.0603631	0.255057	0.368921		0.482312	0.250642	0.17039	0.355978	0.457032	0.670794	0.130751		0.033966	0.362637	0.317682		0.215867	0.78746	-0.0276804	0.5129	0.0493375	0.745522
6.48536	0.544865	1.11725	0.674619	-0.524688	-0.0828367	0.895575	0.774856		0.154347	0.591208	0.312033	-0.149398	0.0607933	0.206076	0.354579		0.452159	0.1919	0.137028	0.423136	0.463295	0.690692	0.121777		0.025974	0.306693	0.278721		0.228199	0.789522	-0.0356514	0.504794	0.0399707	0.714403
6.54812	0.55461	1.17553	0.714487	-0.54155	-0.0888924	0.882449	0.779243		0.177277	0.519867	0.248876	-0.152923	0.0494062	0.171049	0.371772		0.403459	0.154965	0.070091	0.472824	0.429551	0.721613	0.153754		0.00999001	0.214785	0.238761		0.243335	0.80852	-0.0633824	0.485046	0.0272602	0.692695
6.61088	0.59682	1.217	0.730385	-0.63941	-0.0891188	0.858546	0.782634		0.18809	0.471305	0.15613	-0.12652	0.040183	0.180182	0.413683		0.363049	0.152944	0.0255391	0.452626	0.411815	0.749522	0.191948		0.00599401	0.164835	0.1998		0.247473	0.811077	-0.086365	0.453056	0.0306056	0.692341
6.67364	0.642808	1.22433	0.705857	-0.742568	-0.0826294	0.825596	0.76733		0.196621	0.457096	0.0875497	-0.0910712	0.0445119	0.219816	0.447864		0.359806	0.164839	0.0365656	0.363196	0.448044	0.768588	0.185903		0.00699301	0.178821	0.205794		0.233908	0.819486	-0.072319	0.44824	0.0296472	0.699819
6.7364	0.659096	1.1879	0.661952	-0.77496	-0.0825771	0.798318	0.728096		0.207392	0.460484	0.0883735	-0.0849074	0.0611188	0.245657	0.445292		0.398585	0.164785	0.0868468	0.266923	0.520738	0.779293	0.12725		0.011988	0.277722	0.206793		0.208886	0.802556	-0.0728093	0.461781	0.0372919	0.711003
6.79916	0.635639	1.11515	0.636518	-0.740613	-0.101443	0.785687	0.682328		0.21953	0.456486	0.145102	-0.139802	0.0780742	0.230004	0.410151		0.45381	0.152813	0.130167	0.231442	0.572355	0.781117	0.0609769		0.025974	0.432567	0.203796		0.184506	0.771973	-0.0701179	0.475913	0.0403248	0.721297
6.86192	0.592736	1.03491	0.646142	-0.717934	-0.135157	0.782954	0.656521		0.233237	0.439014	0.192119	-0.247123	0.087165	0.190845	0.378072		0.490305	0.153458	0.135266	0.263437	0.557527	0.772156	0.0381351		0.036963	0.557443	0.188811		0.180454	0.738546	-0.0705226	0.472024	0.052136	0.712488
6.92469	0.557055	0.986062	0.672579	-0.771516	-0.165293	0.780579	0.661253		0.251319	0.426119	0.175445	-0.349259	0.0942686	0.169839	0.381425		0.491019	0.185603	0.112164	0.302004	0.480563	0.754582	0.0640316		0.03996	0.588412	0.182817		0.156583	0.728585	-0.0737652	0.475206	0.0406781	0.702127
6.98745	0.533287	0.991882	0.686597	-0.878061	-0.175671	0.774851	0.680655		0.272836	0.438095	0.10904	-0.378645	0.111466	0.183805	0.415984		0.464633	0.238266	0.0968675	0.279448	0.385188	0.735028	0.0982483		0.035964	0.532468	0.218781		0.143191	0.733858	-0.0756737	0.469588	0.0231309	0.68416
7.05021	0.504824	1.03874	0.680075	-0.948366	-0.16358	0.766477	0.687922		0.288582	0.472801	0.0617832	-0.318878	0.137913	0.205063	0.444245		0.428577	0.278432	0.112774	0.186902	0.313199	0.716743	0.102056		0.048951	0.434565	0.323676		0.156689	0.736993	-0.0804782	0.484644	0.0118894	0.663766
7.11297	0.46302	1.0817	0.67019	-0.920667	-0.135536	0.752463	0.671527		0.287446	0.504914	0.0855135	-0.228045	0.152519	0.193823	0.433396		0.389633	0.28108	0.14792	0.0789297	0.275845	0.694393	0.0772297		0.0709291	0.341658	0.519481		0.148818	0.733626	-0.0531527	0.50632	-0.0109833	0.627807
7.17573	0.428632	1.07855	0.673781	-0.822675	-0.0981385	0.726009	0.646314		0.268614	0.509149	0.158967	-0.190463	0.131211	0.146189	0.389176		0.344858	0.249768	0.168893	0.0171594	0.26087	0.661521	0.055479		0.0689311	0.25974	0.64036		0.150473	0.717106	-0.0500183	0.505953	-0.0424827	0.603495
7.23849	0.43573	1.0249	0.684437	-0.737756	-0.0584247	0.686552	0.639637		0.245042	0.481999	0.207056	-0.234645	0.0738337	0.102459	0.350458		0.299431	0.210161	0.155249	0.0149157	0.257428	0.623589	0.0572312		0.042957	0.16983	0.635365		0.156912	0.717505	-0.0777041	0.481165	-0.0555893	0.58875
7.30126	0.492881	0.956966	0.680151	-0.71838	-0.0312695	0.645595	0.66702		0.231873	0.440398	0.175128	-0.299344	0.0114824	0.104686	0.350216		0.275961	0.188201	0.119785	0.0371905	0.2666	0.598656	0.0705931		0.013986	0.117882	0.526474		0.172626	0.736973	-0.126452	0.444607	-0.0641133	0.562648
7.36402	0.566862	0.91719	0.652567	-0.743614	-0.0377803	0.617179	0.719536		0.230958	0.402314	0.0806388	-0.290097	-0.0174672	0.150152	0.383255		0.298538	0.195058	0.096315	0.0463971	0.289028	0.600261	0.0715963		0.010989	0.12987	0.408591		0.169406	0.738549	-0.13256	0.413537	-0.0719818	0.561206
7.42678	0.611947	0.915885	0.62321	-0.759858	-0.0884831	0.60194	0.771584		0.228487	0.372529	-0.00828056	-0.176576	-0.00173669	0.192867	0.413233		0.365544	0.225901	0.109018	0.0376833	0.311246	0.620359	0.0556358		0.00999001	0.186813	0.295704		0.156921	0.731117	-0.136022	0.398558	-0.0310969	0.574492
7.48954	0.615834	0.927443	0.626227	-0.747906	-0.167101	0.584587	0.799621		0.209169	0.347265	-0.0389433	-0.0316613	0.0319453	0.191861	0.410427		0.442158	0.26328	0.153199	0.0275638	0.312905	0.634368	0.0399509		0.018981	0.2997	0.216783		0.15336	0.713148	-0.119735	0.399704	0.00433901	0.610877
7.5523	0.61154	0.924071	0.674017	-0.736851	-0.236013	0.55032	0.796724		0.172379	0.327698	-0.0137886	0.033601	0.0435401	0.153242	0.381274		0.485272	0.279126	0.203033	0.0182873	0.289508	0.626333	0.0368309		0.022977	0.374625	0.177822		0.146623	0.712956	-0.133441	0.398524	0.0210324	0.619985
7.61506	0.640485	0.909089	0.740529	-0.75635	-0.263233	0.50233	0.775085		0.133677	0.323371	0.0305369	-0.0224779	0.017124	0.12086	0.361319		0.478821	0.242643	0.234854	-0.0120959	0.263773	0.606497	0.0347015		0.014985	0.321678	0.167832		0.1477	0.715203	-0.143529	0.396841	0.0131833	0.613866
7.67782	0.706152	0.911785	0.778713	-0.792916	-0.246365	0.459257	0.757481		0.110996	0.341168	0.0699096	-0.132338	-0.0244993	0.128034	0.381052		0.444828	0.140149	0.242586	-0.0782819	0.269118	0.598848	0.0128971		0.00699301	0.192807	0.223776		0.167228	0.731169	-0.15919	0.400873	-0.00587946	0.588303
7.74059	0.768516	0.94919	0.755454	-0.805274	-0.210414	0.434086	0.762934		0.110205	0.374331	0.109233	-0.189635	-0.0412934	0.16449	0.438902		0.419709	-0.00594123	0.234386	-0.15337	0.319093	0.61042	-0.0282198		0.010989	0.115884	0.356643		0.17087	0.755383	-0.142979	0.408767	-0.032689	0.563162
7.80335	0.78423	0.999377	0.673877	-0.777057	-0.183245	0.418545	0.793561		0.1232	0.406065	0.157766	-0.156929	-0.0125248	0.192719	0.50481		0.420492	-0.142784	0.219811	-0.179282	0.392837	0.618297	-0.0607243		0.017982	0.107892	0.555445		0.172042	0.782986	-0.112809	0.4411	-0.0464769	0.533581
7.86611	0.747819	1.02007	0.568337	-0.739159	-0.174648	0.392006	0.831207		0.136932	0.424457	0.203884	-0.0974444	0.0455239	0.191566	0.546673		0.43393	-0.22248	0.202864	-0.120645	0.451193	0.593356	-0.0564971		0.0709291	0.147852	0.733267		0.151044	0.755862	-0.0740264	0.467423	-0.0536485	0.537541
7.92887	0.69067	0.994922	0.481367	-0.733627	-0.178029	0.346074	0.849133		0.142078	0.431942	0.225239	-0.0994006	0.0949998	0.176817	0.553485		0.435704	-0.238892	0.184756	-0.00786027	0.468259	0.537372	-0.0171343		0.150849	0.267732	0.791209		0.123325	0.693337	-0.0666733	0.503998	-0.0480287	0.543684
7.99163	0.643652	0.955365	0.440982	-0.763809	-0.187153	0.297217	0.83254		0.134874	0.439144	0.219538	-0.177699	0.108448	0.178525	0.537482		0.416425	-0.228814	0.167603	0.0808638	0.449704	0.490613	0.0280277		0.224775	0.382617	0.777223		0.0934451	0.66387	-0.0670417	0.513796	-0.0503291	0.541833
8.05439	0.60817	0.950368	0.449548	-0.791049	-0.205216	0.272058	0.790747		0.115926	0.450968	0.211513	-0.261238	0.0878785	0.205201	0.519115		0.388108	-0.232801	0.151956	0.0880259	0.423573	0.496153	0.0517359		0.237762	0.428571	0.725275		0.0813902	0.645207	-0.0824485	0.515893	-0.0529537	0.532238
8.11715	0.565994	0.994704	0.485671	-0.779652	-0.23589	0.279707	0.747851		0.0912219	0.460813	0.222219	-0.278125	0.0565208	0.237209	0.510793		0.368752	-0.253704	0.132833	0.030841	0.414595	0.555367	0.0507691		0.22977	0.436563	0.71029		0.0904089	0.647086	-0.103866	0.498929	-0.0690618	0.534896
8.17992	0.510591	1.0532	0.516905	-0.734122	-0.269501	0.299763	0.719005		0.0728246	0.458594	0.238621	-0.241478	0.0348198	0.254437	0.511086		0.364622	-0.256091	0.10363	-0.0139109	0.424871	0.622385	0.0375889		0.232767	0.467532	0.699301		0.0822652	0.638571	-0.109173	0.504666	-0.0769076	0.561278
8.24268	0.459239	1.08048	0.51868	-0.686437	-0.284083	0.298293	0.696127		0.0729566	0.442867	0.226524	-0.237665	0.0243836	0.262584	0.510098		0.367469	-0.207915	0.0670597	0.0182551	0.435073	0.64615	0.0184727		0.240759	0.541459	0.662338		0.0781684	0.623261	-0.107867	0.498954	-0.0739967	0.581561
8.30544	0.431759	1.0732	0.489325	-0.655488	-0.263805	0.25598	0.659149		0.0932344	0.424062	0.177161	-0.328311	0.0129329	0.285843	0.499804		0.364843	-0.120319	0.0398253	0.119867	0.422724	0.618194	-0.0106846		0.241758	0.617383	0.585415		0.0648277	0.585702	-0.108659	0.487107	-0.0735236	0.589752
8.3682	0.423794	1.07566	0.449075	-0.632652	-0.216668	0.182425	0.601463		0.120717	0.41618	0.130828	-0.4751	-0.00777469	0.335066	0.481935		0.350054	-0.0425448	0.0407445	0.221328	0.382848	0.577613	-0.0473244		0.24975	0.649351	0.54046		0.039734	0.570054	-0.111733	0.477784	-0.0706891	0.566973
8.43096	0.408874	1.12991	0.421501	-0.607986	-0.172387	0.106268	0.540825		0.138753	0.425414	0.141551	-0.572687	-0.0302863	0.38969	0.467593		0.324462	-0.0167289	0.0706529	0.259119	0.336156	0.569694	-0.0721045		0.274725	0.671329	0.561439		0.0336838	0.568112	-0.121413	0.471562	-0.0734901	0.557223
8.49372	0.367711	1.22419	0.413026	-0.594934	-0.160352	0.0531359	0.501798		0.143956	0.445129	0.215991	-0.55605	-0.0374818	0.415207	0.467412		0.295791	-0.0403177	0.105501	0.23431	0.317828	0.602399	-0.066235		0.36963	0.705295	0.666334		0.0283197	0.553367	-0.0998847	0.479461	-0.0747285	0.568138
8.55649	0.30987	1.29779	0.410767	-0.613591	-0.186277	0.0302101	0.488687		0.150448	0.459841	0.296232	-0.466725	-0.0197257	0.396736	0.47915		0.276659	-0.0748762	0.11386	0.204434	0.351688	0.644481	-0.0380594		0.548452	0.847153	0.761239		0.0173088	0.549968	-0.0807829	0.500782	-0.0556445	0.569896
8.61925	0.262418	1.29973	0.401327	-0.651826	-0.226908	0.0255989	0.480936		0.173975	0.454844	0.311831	-0.407734	0.0140993	0.351752	0.485199		0.280317	-0.0895431	0.0845312	0.219254	0.426117	0.662785	-0.0220585		0.763237	0.961039	0.784216		-0.00422219	0.533244	-0.0632903	0.512463	-0.0671722	0.591146
8.68201	0.239961	1.23927	0.389562	-0.661194	-0.246525	0.017875	0.458245		0.211645	0.426174	0.248466	-0.437552	0.0425431	0.309901	0.466489		0.310548	-0.0910583	0.0368205	0.267135	0.491828	0.656082	-0.0434424		0.828172	0.792208	0.679321		-0.0339566	0.496405	-0.0582244	0.504098	-0.0684788	0.619258
8.74477	0.231861	1.17465	0.394278	-0.605637	-0.222253	-0.0120801	0.426723		0.24089	0.385186	0.158954	-0.515691	0.0486727	0.284217	0.422899		0.353092	-0.109361	0.00189133	0.287479	0.490026	0.650756	-0.0862017		0.677323	0.784216	0.571429		-0.0353678	0.501607	-0.0941091	0.466998	-0.0752593	0.60577
8.80753	0.22011	1.15284	0.423064	-0.510006	-0.159863	-0.0713852	0.413251		0.241768	0.352821	0.10512	-0.551675	0.0319466	0.264396	0.379555		0.381774	-0.157738	-0.00685299	0.23702	0.395941	0.667497	-0.104903		0.443556	0.966034	0.517483		-0.0254202	0.518084	-0.119568	0.42993	-0.0911846	0.591254
8.87029	0.203524	1.16557	0.454572	-0.444343	-0.089345	-0.150458	0.431349		0.219542	0.344627	0.095835	-0.498008	0.00455555	0.235057	0.368514		0.380191	-0.213405	-0.00479608	0.141713	0.245224	0.69779	-0.0723691		0.328671	0.811189	0.556444		-0.00267166	0.549233	-0.147075	0.422219	-0.120175	0.567919
8.93305	0.197109	1.16684	0.452261	-0.451683	-0.0435288	-0.226895	0.457921		0.201295	0.357451	0.0892464	-0.38918	-0.0219915	0.194749	0.400148		0.359855	-0.239596	-0.0184142	0.0785317	0.118323	0.714346	-0.0116492		0.301698	0.69031	0.62038		-0.00707889	0.544935	-0.158882	0.436006	-0.128988	0.561035
8.99582	0.20765	1.12919	0.400225	-0.499109	-0.0349473	-0.2784	0.452034		0.207532	0.371978	0.0525026	-0.297095	-0.0450237	0.155229	0.452138		0.353274	-0.223236	-0.0582318	0.101745	0.0894404	0.700872	0.0248576		0.363636	0.786214	0.637363		-0.0305275	0.510032	-0.156964	0.439302	-0.16431	0.557084
9.05858	0.217623	1.07453	0.324825	-0.512498	-0.0482571	-0.297204	0.399438		0.228422	0.372761	0.00659348	-0.263284	-0.0660374	0.126403	0.488668		0.384287	-0.185815	-0.109612	0.186321	0.176746	0.667927	0.00770844		0.506494	0.955045	0.543457		-0.0776165	0.473551	-0.154047	0.437715	-0.145903	0.56754
9.12134	0.200755	1.04635	0.276904	-0.460064	-0.0545284	-0.294156	0.333167		0.231631	0.36769	0.00318433	-0.279663	-0.0813432	0.107499	0.491354		0.444369	-0.156263	-0.147628	0.247333	0.33148	0.640363	-0.0424153		0.575425	0.691309	0.407592		-0.0776942	0.445333	-0.157313	0.417217	-0.101234	0.587465
9.1841	0.153582	1.05642	0.288915	-0.389347	-0.0359167	-0.287947	0.30299		0.195332	0.384094	0.0612482	-0.321366	-0.0820458	0.0934167	0.470392		0.501002	-0.137228	-0.157354	0.219961	0.472799	0.633072	-0.0798162		0.59041	0.58042	0.354645		-0.0643057	0.438118	-0.153416	0.408705	-0.0884248	0.585913
9.24686	0.105361	1.06706	0.347711	-0.372693	0.000366287	-0.288517	0.323285		0.1321	0.439918	0.138982	-0.376741	-0.0658639	0.0847852	0.4457		0.531385	-0.102912	-0.13933	0.123264	0.53956	0.640584	-0.0794175		0.532468	0.619381	0.347652		-0.0419583	0.455891	-0.154316	0.425916	-0.0797474	0.604393
9.30962	0.0913911	1.03019	0.408536	-0.42274	0.0304551	-0.289653	0.356484		0.0781594	0.517205	0.175468	-0.437817	-0.0471256	0.0873805	0.421305		0.546233	-0.0311832	-0.100454	0.0448275	0.520569	0.647138	-0.0520347		0.482517	0.627373	0.328671		-0.0299926	0.472476	-0.163731	0.436083	-0.0709534	0.604231
9.37238	0.116819	0.941073	0.435065	-0.476751	0.0350055	-0.276948	0.352943		0.0591371	0.568774	0.155264	-0.476815	-0.0500762	0.102746	0.383858		0.577427	0.0650472	-0.0466546	0.060318	0.44727	0.642324	-0.0190254		0.484515	0.538462	0.256743		-0.0247035	0.472026	-0.184038	0.430236	-0.0514214	0.628515
9.43515	0.150518	0.84864	0.426907	-0.469565	0.0117912	-0.242703	0.305616		0.0679999	0.557969	0.122428	-0.455903	-0.0880442	0.124073	0.327595		0.641843	0.141649	0.0132195	0.165195	0.364054	0.626514	0.0155946		0.46953	0.34965	0.151848		-0.0377359	0.45649	-0.206919	0.40379	-0.0380822	0.668338
9.49791	0.156341	0.810996	0.412139	-0.410331	-0.0306597	-0.193887	0.259307		0.0767728	0.495202	0.128875	-0.370263	-0.148519	0.143613	0.274914		0.719945	0.159871	0.0615929	0.282124	0.303469	0.605663	0.0604131		0.456543	0.211788	0.0829171		-0.0542621	0.437462	-0.205795	0.397386	-0.00245789	0.69729
9.56067	0.128357	0.842277	0.417927	-0.372097	-0.0868393	-0.147449	0.262756		0.0672778	0.433718	0.176723	-0.271545	-0.200946	0.161358	0.263459		0.772078	0.120048	0.0784958	0.332015	0.280214	0.585521	0.111315		0.444555	0.171828	0.0599401		-0.0557215	0.440538	-0.203984	0.405828	0.00608028	0.704583
9.62343	0.0932304	0.904245	0.449361	-0.405076	-0.156453	-0.119092	0.315053		0.0475668	0.425858	0.219294	-0.232218	-0.221366	0.182364	0.30797		0.774801	0.0607376	0.0578343	0.297063	0.296846	0.5705	0.146314		0.464535	0.187812	0.0749251		-0.0596598	0.453599	-0.195557	0.40715	-0.0038566	0.683442
9.68619	0.0794581	0.947494	0.491889	-0.47512	-0.23248	-0.115258	0.365086		0.0388469	0.480807	0.21671	-0.2804	-0.209952	0.205605	0.377042		0.739097	0.0260591	0.015301	0.219642	0.347037	0.563238	0.153079		0.547453	0.235764	0.123876		-0.0601073	0.463896	-0.190644	0.437506	-0.0163537	0.668143
9.74895	0.0880487	0.956977	0.527473	-0.50077	-0.293125	-0.132371	0.364935		0.0502567	0.562912	0.180595	-0.375343	-0.184617	0.220134	0.413519		0.693637	0.0326104	-0.0237911	0.150487	0.412544	0.561307	0.153228		0.629371	0.243756	0.163836		-0.0711841	0.45865	-0.187668	0.44856	-0.0100538	0.649679
9.81172	0.0946879	0.956585	0.546343	-0.447113	-0.313835	-0.160855	0.319115		0.0695176	0.627909	0.15803	-0.45245	-0.159249	0.216232	0.382328		0.654527	0.063683	-0.0451522	0.106943	0.463095	0.555458	0.184336		0.706294	0.242757	0.178821		-0.0725949	0.4534	-0.166384	0.450579	-0.00285321	0.660719
9.87448	0.0775058	0.973639	0.548003	-0.367658	-0.291043	-0.190168	0.276938		0.076923	0.657805	0.1765	-0.488423	-0.131046	0.199333	0.299615		0.615204	0.090469	-0.0518417	0.079676	0.468476	0.535504	0.252936		0.714286	0.242757	0.191808		-0.0832232	0.448709	-0.157246	0.446218	-0.0192966	0.664719
9.93724	0.0387612	1.0049	0.537598	-0.345436	-0.251216	-0.213185	0.278196		0.064268	0.662297	0.21461	-0.514207	-0.0900063	0.188319	0.215567		0.564646	0.0971128	-0.0502582	0.0657186	0.418716	0.500564	0.315489		0.733267	0.293706	0.221778		-0.114521	0.461445	-0.14451	0.435043	-0.0410647	0.658972
10	-0.000400997	1.01982	0.523001	-0.401274	-0.231392	-0.228906	0.312368		0.0382177	0.654426	0.230092	-0.564117	-0.0379953	0.197228	0.170442		0.509671	0.0882338	-0.0354355	0.0788077	0.335862	0.461899	0.31932		0.745255	0.38961	0.305694		-0.111813	0.464731	-0.152459	0.429145	-0.084004	0.639855

## Sheet: 2G
Punishment (Exp. 2 - AI Photom group)
	NIC infusion								ACTIVE non-reinforced								INACTIVE								PUNISHED								Permutation Tests							Bootstrap tests
Time	A2	A3	A4	B1	B3	B4	B6		A2	A3	A4	B1	B3	B4	B6		A2	A3	A4	B1	B3	B4	B6		A2	A3	A4	B1	B3	B4	B6		REW-AC	REW-INAC	AC-INAC	PUN-REW	PUN-AC	PUN-INAC		REW		AC		INAC		PUN
-5	0.385879	0.263431	-0.50188	0.553637	0.576964	-0.193054	0.00877613		-0.452834	-0.0144118	-0.308633	-0.0202113	-0.00809306	0.00891191	0.112921		-0.00221446	-0.0887322	0.14653	0.385426	-0.179702	0.0463216	-0.123402		-0.707012	0.703825	-0.240516	0.112906	0.218681	0.363394	0.0238075		0.411588	0.473526	0.95005	0.951049	0.303696	0.387612		-0.303822	0.544078	-0.207121	0.195943	-0.216798	0.224772	-0.211688	0.495323
-4.93724	0.128763	0.122627	-0.448016	0.443664	0.558148	-0.146955	0.0218256		-0.562665	-0.0513609	-0.310985	-0.0990132	0.0252697	-0.0398441	0.0197412		-0.133819	-0.196905	0.0500732	0.341144	-0.141406	0.0362754	0.0243428		-0.61694	0.457027	-0.0960362	0.0590946	0.105284	0.467682	0.0368217		0.288711	0.432567	0.684316	0.885115	0.154845	0.334665		-0.332518	0.527621	-0.251401	0.144014	-0.246798	0.211278	-0.193406	0.465746
-4.87448	-0.185863	0.0575467	-0.389977	0.184476	0.512614	-0.18607	-0.0660372		-0.60052	-0.0351559	-0.316627	-0.141723	0.0590731	-0.100074	-0.0403407		-0.131392	-0.219457	0.0113148	0.274316	-0.122225	0.0906737	0.136728		-0.591942	0.245932	0.0134495	0.128495	0.0667269	0.302989	0.0420515		0.448551	0.919081	0.302697	0.671329	0.153846	0.511489		-0.395186	0.451476	-0.279205	0.10141	-0.217627	0.228295	-0.22053	0.393144
-4.81172	-0.43467	0.0661973	-0.349354	-0.0603307	0.416426	-0.277705	-0.208603		-0.533706	0.0662092	-0.326359	-0.140626	0.0808079	-0.129014	-0.0308053		-0.0231372	-0.136176	0.0260133	0.197899	-0.1276	0.161312	0.122279		-0.633397	0.151978	0.0398465	0.297406	0.0674268	-0.029351	0.0025999		0.915085	0.337662	0.167832	0.471528	0.383616	0.875125		-0.510402	0.349821	-0.258475	0.103563	-0.16719	0.260316	-0.294721	0.372198
-4.74895	-0.593414	0.0682302	-0.345016	-0.17146	0.304854	-0.295064	-0.293011		-0.394708	0.214912	-0.337976	-0.107845	0.0793199	-0.100063	0.0326513		0.0889144	-0.0150744	0.0407171	0.132336	-0.164535	0.194168	-0.00823624		-0.663839	0.21185	-0.0139855	0.474016	0.044029	-0.27448	-0.080794		0.310689	0.115884	0.277722	0.421578	0.998002	0.453546		-0.539061	0.268177	-0.209025	0.151852	-0.141679	0.263712	-0.350351	0.312599
-4.68619	-0.752698	0.0388672	-0.364835	-0.133175	0.246753	-0.162377	-0.253535		-0.245457	0.318388	-0.345245	-0.0603736	0.0513814	-0.0252837	0.0985765		0.118218	0.0489029	0.00700133	0.0953723	-0.236742	0.174154	-0.155649		-0.604588	0.396693	-0.103423	0.552705	-0.0339687	-0.249362	-0.150745		0.20979	0.204795	0.85015	0.579421	0.581419	0.497502		-0.505175	0.250418	-0.14193	0.210121	-0.169713	0.240139	-0.374676	0.296662
-4.62343	-1.01515	0.049797	-0.373524	-0.00389314	0.268845	0.0374047	-0.143154		-0.121481	0.308282	-0.348063	-0.00959236	0.00659492	0.0466785	0.123424		0.0763634	0.0233441	-0.0730252	0.0896123	-0.328087	0.134416	-0.226421		-0.449497	0.605591	-0.17712	0.480698	-0.138254	-0.0143484	-0.13917		0.462537	0.794206	0.490509	0.824176	0.647353	0.993007		-0.423461	0.349399	-0.12606	0.225343	-0.210897	0.179189	-0.325585	0.278058
-4.56067	-1.36038	0.167199	-0.34184	0.14785	0.312044	0.129156	-0.0821639		-0.0129764	0.207432	-0.360083	0.035457	-0.0359169	0.0619064	0.102111		0.0629105	-0.036276	-0.153421	0.0986392	-0.397299	0.123048	-0.214703		-0.27115	0.708075	-0.202437	0.296465	-0.211901	0.184339	-0.0353234		0.981019	0.562438	0.376623	0.928072	0.917083	0.463536		-0.340453	0.382926	-0.135133	0.212367	-0.228594	0.140183	-0.253798	0.3275
-4.49791	-1.60721	0.340348	-0.26209	0.274922	0.276154	0.0282431	-0.133231		0.102297	0.11031	-0.398005	0.0609193	-0.0594114	0.00282801	0.0615323		0.162898	-0.0519234	-0.191702	0.0961721	-0.401208	0.157076	-0.192838		-0.164496	0.633054	-0.169325	0.109918	-0.222474	0.148228	0.0971967		0.844156	0.706294	0.755245	0.759241	0.544456	0.403596		-0.339056	0.380528	-0.162812	0.16627	-0.226038	0.150482	-0.241567	0.348217
-4.43515	-1.53795	0.429496	-0.140053	0.340783	0.117088	-0.160347	-0.233866		0.215932	0.0909798	-0.459196	0.053472	-0.0608559	-0.0933719	0.0289236		0.350673	-0.0077699	-0.185669	0.0624911	-0.331835	0.205083	-0.224678		-0.180107	0.434996	-0.085959	0.0288235	-0.186447	-0.0953772	0.175099		0.934066	0.671329	0.582418	0.547453	0.480519	0.753247		-0.39969	0.287444	-0.187586	0.128256	-0.205363	0.179008	-0.260025	0.363746
-4.37238	-1.10657	0.352686	0.0142084	0.309371	-0.099775	-0.244216	-0.259615		0.286656	0.132779	-0.513962	0.0177286	-0.0508711	-0.159468	0.0078116		0.500724	0.0381419	-0.164945	-0.00271374	-0.229491	0.215439	-0.295036		-0.293796	0.261695	0.0231865	0.0797499	-0.146344	-0.341757	0.166021		0.705295	0.2997	0.281718	0.507493	0.623377	0.807193		-0.439007	0.219456	-0.205377	0.111538	-0.174857	0.192122	-0.303401	0.303254
-4.30962	-0.545505	0.183098	0.178659	0.166727	-0.247757	-0.143422	-0.154096		0.283249	0.153173	-0.527331	-0.0156743	-0.0418599	-0.149307	-0.017106		0.500296	0.0261639	-0.153159	-0.0791345	-0.151555	0.165805	-0.3296		-0.425789	0.233516	0.122813	0.187759	-0.129247	-0.419766	0.105387		0.868132	0.458541	0.364635	0.689311	0.677323	0.815185		-0.375249	0.219509	-0.211368	0.103827	-0.178918	0.170421	-0.299194	0.272837
-4.24686	-0.234118	0.0794916	0.309655	-0.0492869	-0.245972	0.0286056	0.00785807		0.226091	0.0956505	-0.491728	-0.00919658	-0.0364258	-0.0716744	-0.0550042		0.352644	-0.0324251	-0.14546	-0.137432	-0.122393	0.0871025	-0.281849		-0.49395	0.339874	0.182414	0.238905	-0.128785	-0.343482	0.0508323		0.612388	0.779221	0.701299	0.971029	0.597403	0.797203		-0.293694	0.292458	-0.211979	0.0999882	-0.210668	0.13021	-0.272177	0.25794
-4.1841	-0.393077	0.122575	0.357859	-0.25873	-0.124654	0.0928546	0.0869214		0.180759	-0.0102138	-0.43573	0.0470124	-0.0285662	0.0236575	-0.0922759		0.168579	-0.0662077	-0.123874	-0.157825	-0.11442	0.0355888	-0.190746		-0.469265	0.454124	0.191684	0.177124	-0.122982	-0.262177	0.0295007		0.352647	0.410589	0.969031	0.699301	0.564436	0.588412		-0.249403	0.345416	-0.205828	0.105374	-0.220936	0.124192	-0.234849	0.230155
-4.12134	-0.857331	0.237244	0.307086	-0.39525	0.00944283	0.00249581	0.00581404		0.205967	-0.0818137	-0.397472	0.120187	-0.0163429	0.0932038	-0.103203		0.0600776	-0.0255912	-0.0883022	-0.144854	-0.0816933	0.0364654	-0.14418		-0.396149	0.454764	0.158974	0.0498617	-0.102184	-0.285651	0.0303481		0.616384	0.687313	0.928072	0.829171	0.786214	0.841159		-0.278466	0.302059	-0.193351	0.127789	-0.195141	0.139201	-0.24897	0.212976
-4.05858	-1.15716	0.282294	0.197415	-0.456235	0.0689696	-0.104997	-0.188368		0.303347	-0.0691786	-0.389536	0.160829	-0.0111087	0.133104	-0.0781306		0.0478644	0.0585772	-0.0646838	-0.126936	-0.0121509	0.055367	-0.185859		-0.355604	0.334107	0.0949287	-0.0402787	-0.0749179	-0.38024	0.0352278		0.552448	0.515485	0.907093	0.776224	0.747253	0.664336		-0.387675	0.198567	-0.165179	0.157606	-0.171626	0.168108	-0.284133	0.183809
-3.99582	-0.880419	0.202471	0.101825	-0.493786	0.052039	-0.0576357	-0.375603		0.41357	-3.06566e-05	-0.391262	0.148526	-0.0306279	0.166533	-0.0393467		0.070646	0.10809	-0.0801622	-0.136992	0.0570614	0.032214	-0.266445		-0.391971	0.190276	0.00421129	-0.0319707	-0.0485799	-0.431985	0.042041		0.122877	0.172827	0.765235	0.427572	0.41958	0.55045		-0.441499	0.124423	-0.139923	0.167904	-0.168085	0.159052	-0.326027	0.177373
-3.93305	-0.0191292	0.0760851	0.0741402	-0.554717	0.0251772	0.161941	-0.463683		0.460259	0.0585124	-0.373368	0.111778	-0.0806515	0.202613	-0.0247774		0.0695162	0.0849564	-0.133643	-0.185013	0.0781409	-0.0509443	-0.293168		-0.46468	0.120157	-0.100658	0.0425069	-0.0122188	-0.383859	0.0543441		0.0869131	0.283716	0.320679	0.325674	0.446553	0.998002		-0.474666	0.114228	-0.141948	0.184635	-0.221838	0.106025	-0.289485	0.17288
-3.87029	1.00953	0.0171934	0.118407	-0.634284	0.0514783	0.390124	-0.440705		0.404853	0.0725917	-0.325139	0.0991206	-0.14364	0.215372	-0.0519309		0.0465994	0.0328676	-0.195238	-0.244071	0.0438285	-0.138489	-0.225156		-0.475995	0.129669	-0.18155	0.0953953	0.0536258	-0.287464	0.0605802		0.265734	0.809191	0.166833	0.422577	0.798202	0.368631		-0.469206	0.202706	-0.17182	0.167684	-0.262612	0.0442727	-0.275855	0.222905
-3.80753	1.69356	0.0523939	0.205296	-0.692823	0.134844	0.443799	-0.349908		0.273122	0.06897	-0.256062	0.129556	-0.188343	0.169153	-0.0976584		0.0401144	0.0245488	-0.235513	-0.26503	-0.0033551	-0.147484	-0.111279		-0.357314	0.150405	-0.185054	0.0672143	0.147666	-0.226082	0.0388471		0.772228	0.71029	0.27972	0.683317	0.817183	0.281718		-0.41413	0.302285	-0.199422	0.133044	-0.263571	0.04603	-0.259777	0.246789
-3.74477	1.81169	0.107235	0.308076	-0.712471	0.222897	0.297671	-0.237573		0.139634	0.0948769	-0.177226	0.173928	-0.193718	0.0645114	-0.11748		0.0599907	0.0756629	-0.252931	-0.21255	-0.0118404	-0.053277	-0.0300788		-0.133203	0.133275	-0.0841431	-0.029095	0.23324	-0.216632	-0.0137385		0.787213	0.75025	0.992008	0.957043	0.679321	0.653347		-0.346971	0.335462	-0.211579	0.115658	-0.207481	0.111523	-0.257694	0.242778
-3.68201	1.53524	0.102243	0.413419	-0.724872	0.252862	0.097542	-0.130898		0.0829725	0.16206	-0.0904093	0.187422	-0.165779	-0.0468206	-0.0892957		0.0685138	0.125212	-0.270778	-0.0945884	0.0341969	0.0731022	0.000406487		0.101669	0.110187	0.087083	-0.138426	0.261295	-0.208754	-0.06464		0.708292	0.863137	0.380619	0.906094	0.789211	0.718282		-0.301696	0.318863	-0.189558	0.129061	-0.140321	0.186726	-0.257872	0.223128
-3.61925	1.19005	0.0384139	0.501177	-0.77401	0.195413	0.00753955	-0.0473701		0.137284	0.23561	0.00245048	0.158573	-0.131939	-0.0987091	-0.0383603		0.0285819	0.106336	-0.308339	0.0396961	0.112487	0.122875	0.0410151		0.268458	0.155796	0.246493	-0.221941	0.214024	-0.16966	-0.0686131		0.874126	0.673327	0.357642	0.948052	0.922078	0.566434		-0.305871	0.296602	-0.175581	0.152126	-0.108506	0.211833	-0.242507	0.222204
-3.55649	0.945577	-0.0203728	0.532043	-0.853906	0.0674775	0.0556306	0.000248842		0.266931	0.271424	0.0876505	0.121713	-0.118377	-0.0657876	-0.0150556		-0.0417218	0.027056	-0.357545	0.132748	0.197959	0.0528387	0.155176		0.360969	0.292628	0.320044	-0.27706	0.125474	-0.136949	-0.00982828		0.869131	0.727273	0.788212	0.833167	0.932068	0.884116		-0.347306	0.296565	-0.154668	0.171335	-0.128028	0.183631	-0.217711	0.248963
-3.49372	0.736488	-0.0320577	0.473798	-0.893185	-0.0839455	0.127558	0.0167858		0.382679	0.255335	0.148613	0.118932	-0.130911	0.0159637	-0.0439023		-0.0758809	-0.0322799	-0.388851	0.155425	0.288789	-0.0692677	0.321486		0.415636	0.443714	0.291031	-0.309669	0.0537276	-0.165771	0.0804958		0.681319	0.769231	0.811189	0.566434	0.821179	0.671329		-0.354095	0.275484	-0.122048	0.183068	-0.155676	0.171653	-0.218737	0.289062
-3.43096	0.44969	-0.0202522	0.343472	-0.810765	-0.210174	0.0970529	0.0293889		0.395931	0.206067	0.188552	0.152746	-0.154699	0.0812857	-0.0948538		-0.0216104	-0.00444886	-0.379118	0.119869	0.392215	-0.127781	0.434617		0.438905	0.486868	0.199641	-0.30983	0.0279682	-0.234641	0.14885		0.533467	0.541459	0.974026	0.412587	0.716284	0.711289		-0.354817	0.226655	-0.13811	0.172271	-0.143398	0.169495	-0.219227	0.312772
-3.3682	0.126133	-0.0306632	0.211829	-0.591948	-0.287458	-0.0505509	0.0630268		0.278043	0.151373	0.235783	0.181313	-0.169699	0.0877227	-0.109433		0.108286	0.0901149	-0.33327	0.0634692	0.491956	-0.0707071	0.400318		0.387489	0.360566	0.101335	-0.271463	0.0228946	-0.235951	0.160276		0.472527	0.205794	0.387612	0.384615	0.739261	0.772228		-0.344037	0.207636	-0.144257	0.162773	-0.112967	0.225934	-0.209513	0.304976
-3.30544	-0.0646289	-0.0634703	0.152282	-0.312612	-0.331168	-0.217698	0.10994		0.0794723	0.110716	0.316624	0.162265	-0.165993	0.0412505	-0.0592808		0.246659	0.161464	-0.279923	0.0220888	0.544117	0.0421011	0.228196		0.231678	0.119836	0.0298395	-0.229924	-0.0114648	-0.0833395	0.117185		0.417582	0.0989011	0.177822	0.443556	0.942058	0.335664		-0.323932	0.200628	-0.144268	0.17518	-0.0813021	0.279382	-0.234855	0.275302
-3.24268	-0.040768	-0.0695313	0.181106	-0.0904943	-0.386774	-0.298166	0.135491		-0.110146	0.096241	0.421737	0.0985506	-0.146985	-0.0189908	0.0213131		0.325455	0.140498	-0.246974	0.012928	0.514663	0.101793	0.0264297		0.0237467	-0.110898	-0.00537226	-0.256019	-0.0932039	0.175382	0.0469432		0.37962	0.128871	0.325674	0.636364	0.712288	0.240759		-0.306324	0.188165	-0.130671	0.183962	-0.083418	0.28293	-0.253437	0.243097
-3.17992	0.0516512	-0.0148623	0.252123	-0.00888394	-0.495749	-0.270514	0.122344		-0.229519	0.114309	0.506451	0.0373276	-0.121963	-0.0530729	0.0644027		0.316401	0.0444702	-0.239969	0.03223	0.419216	0.057314	-0.0951659		-0.12455	-0.243987	-0.00150376	-0.391756	-0.184216	0.374435	-0.0202562		0.330669	0.364635	0.988012	0.866134	0.380619	0.372627		-0.330634	0.220712	-0.115842	0.20751	-0.129764	0.21655	-0.309825	0.217051
-3.11715	-0.0370064	0.0670051	0.312622	-0.0737598	-0.656218	-0.196613	0.10177		-0.282235	0.154751	0.530961	0.0230414	-0.0977762	-0.0406279	0.0328006		0.23224	-0.0475587	-0.240653	0.0610013	0.318054	-0.0437153	-0.114057		-0.14718	-0.296201	0.0434798	-0.590393	-0.225645	0.377179	-0.0629398		0.278721	0.658342	0.381618	0.931069	0.195804	0.504496		-0.375227	0.22308	-0.116963	0.208012	-0.200977	0.149025	-0.366771	0.174536
-3.05439	-0.385799	0.100576	0.359925	-0.225415	-0.812395	-0.144414	0.127226		-0.312227	0.184047	0.499474	0.0539422	-0.0760017	0.0165484	-0.0435789		0.108278	-0.0751361	-0.224507	0.074029	0.26685	-0.115804	-0.0904169		-0.0956001	-0.357	0.11911	-0.735147	-0.197206	0.209588	-0.071161		0.223776	0.753247	0.243756	0.791209	0.0939061	0.483516		-0.40074	0.214733	-0.125603	0.189993	-0.243251	0.113383	-0.413293	0.139786
-2.99163	-0.782213	0.0457646	0.436959	-0.380138	-0.890164	-0.121076	0.212286		-0.348213	0.165304	0.454573	0.0864462	-0.0541239	0.0979478	-0.0959365		-0.00968443	-0.0445227	-0.181771	0.0534636	0.27218	-0.125523	-0.085677		-0.0844181	-0.487971	0.19669	-0.733239	-0.136553	0.0394676	-0.0508617		0.257742	0.785215	0.256743	0.662338	0.0689311	0.388611		-0.363744	0.198632	-0.130262	0.177478	-0.222377	0.120946	-0.432611	0.126886
-2.92887	-0.912124	-0.0579455	0.57281	-0.468231	-0.855231	-0.0784193	0.303202		-0.377022	0.0951696	0.431103	0.0808963	-0.0268965	0.169102	-0.0810527		-0.0736359	-0.00208436	-0.125615	0.00386259	0.295092	-0.113646	-0.0980677		-0.159374	-0.648799	0.245876	-0.597136	-0.0960143	0.0169424	-0.0258546		0.386613	0.923077	0.257742	0.559441	0.0639361	0.387612		-0.366652	0.241603	-0.107476	0.186979	-0.21311	0.129404	-0.3962	0.120959
-2.86611	-0.685938	-0.127098	0.734284	-0.454716	-0.743742	0.023145	0.322442		-0.371584	0.0162854	0.419146	0.0405103	0.0120529	0.195535	-0.018083		-0.0532463	0.0239776	-0.0812671	-0.044898	0.294009	-0.134429	-0.081093		-0.235027	-0.724655	0.256787	-0.43065	-0.0832457	0.135737	-0.0237998		0.57043	0.751249	0.161838	0.491508	0.0929071	0.595405		-0.357403	0.343707	-0.0912235	0.213628	-0.201274	0.123447	-0.344229	0.159367
-2.80335	-0.36335	-0.110512	0.840772	-0.345368	-0.634496	0.157896	0.239161		-0.336959	-0.0187817	0.376052	0.00519889	0.0657488	0.166727	0.0360947		0.040694	0.0439218	-0.0637271	-0.0578505	0.260077	-0.188805	-0.0146369		-0.18303	-0.637501	0.239315	-0.332652	-0.0537296	0.253853	-0.0492969		0.703297	0.51049	0.0919081	0.508492	0.141858	0.891109		-0.341601	0.362225	-0.0727591	0.238595	-0.206592	0.122187	-0.306277	0.200191
-2.74059	-0.329437	-0.0305608	0.825663	-0.179954	-0.584034	0.240421	0.091627		-0.31634	-0.000962744	0.273718	0.00970772	0.127642	0.110359	0.0436984		0.158484	0.0742002	-0.0613146	-0.0271713	0.213845	-0.227245	0.057911		0.0157907	-0.438348	0.199865	-0.31418	0.031477	0.248338	-0.0717877		0.62038	0.607393	0.125874	0.671329	0.245754	0.952048		-0.351966	0.322348	-0.082835	0.229232	-0.193313	0.115556	-0.276914	0.227738
-2.67782	-0.728154	0.0428206	0.681727	-0.0118069	-0.581747	0.193297	-0.0564478		-0.34446	0.0238003	0.130731	0.0497028	0.180066	0.0751976	0.0162467		0.247734	0.102548	-0.040791	0.01461	0.177983	-0.211468	0.0707671		0.222822	-0.282112	0.127672	-0.306956	0.144366	0.143218	-0.050537		0.350649	0.881119	0.263736	0.79021	0.44955	0.906094		-0.392605	0.278828	-0.0895617	0.210493	-0.17453	0.140103	-0.25268	0.269859
-2.61506	-1.31157	0.0522285	0.452289	0.118759	-0.565444	0.0224372	-0.168509		-0.398964	0.00395664	-0.00110482	0.0872072	0.202285	0.0904303	-0.00796291		0.289828	0.0980446	0.0255207	0.0207524	0.161247	-0.156922	0.00972482		0.259514	-0.29104	0.0130773	-0.245306	0.198533	0.0810266	0.0205261		0.110889	0.312687	0.458541	0.296703	0.712288	0.856144		-0.436853	0.206012	-0.0991947	0.198523	-0.156353	0.163785	-0.248311	0.287731
-2.5523	-1.65647	-0.00644319	0.189795	0.200775	-0.482659	-0.166879	-0.238481		-0.409178	-0.0577924	-0.0766837	0.0857022	0.183911	0.139793	-0.00876733		0.297465	0.0530493	0.130671	-0.0228513	0.165144	-0.10712	-0.0635642		0.0761758	-0.428218	-0.122637	-0.13384	0.130376	0.17034	0.0953562		0.040959	0.0899101	0.6004	0.0999001	0.943057	0.763237		-0.503313	0.13195	-0.115681	0.191272	-0.152811	0.162426	-0.228734	0.29209
-2.48954	-1.54295	-0.0866874	-0.0705653	0.248959	-0.341354	-0.238222	-0.257975		-0.322777	-0.102429	-0.0831523	0.0391508	0.132282	0.179617	-0.00189518		0.28033	0.00187864	0.229414	-0.0768666	0.192791	-0.0768892	-0.0662386		-0.199548	-0.512189	-0.227389	-0.0388344	-0.0263978	0.366554	0.112048		0.043956	0.0599401	0.745255	0.0829171	0.972028	0.832168		-0.528568	0.1287	-0.135162	0.19078	-0.154166	0.175729	-0.237228	0.283592
-2.42678	-1.13705	-0.126841	-0.304499	0.287739	-0.204168	-0.130534	-0.209009		-0.166165	-0.077591	-0.03561	-0.0292166	0.066312	0.183917	-0.0148579		0.227205	-0.0114879	0.269357	-0.0816456	0.241113	-0.0383057	0.0262202		-0.37862	-0.378572	-0.257998	-0.0237895	-0.155438	0.506664	0.0525705		0.124875	0.0799201	0.804196	0.18981	0.933067	0.805195		-0.475455	0.20023	-0.148924	0.182358	-0.134591	0.218349	-0.253349	0.271819
-2.36402	-0.814148	-0.0951306	-0.483696	0.337316	-0.132158	0.0858157	-0.102679		-0.0348678	0.0019482	0.0382343	-0.0911137	0.00195305	0.167357	-0.0525962		0.131585	0.0179648	0.234419	-0.0180951	0.287461	0.0329938	0.154338		-0.368192	-0.0442166	-0.219847	-0.0973704	-0.157855	0.462936	-0.0348582		0.445554	0.120879	0.222777	0.532468	0.888112	0.306693		-0.392014	0.246135	-0.147561	0.167507	-0.0874448	0.292331	-0.256609	0.251382
-2.30126	-0.800759	-0.0201008	-0.580128	0.405787	-0.128966	0.259797	-0.0065771		-0.0177557	0.0653261	0.104851	-0.135238	-0.0569811	0.159669	-0.0912593		0.0258064	0.0480381	0.161794	0.064552	0.296602	0.11183	0.226118		-0.221291	0.290722	-0.161963	-0.214202	-0.0445356	0.263488	-0.0778735		0.937063	0.214785	0.040959	0.919081	0.976024	0.123876		-0.309089	0.28601	-0.164381	0.139938	-0.0341564	0.311866	-0.273708	0.227191
-2.23849	-0.971695	0.0188159	-0.585648	0.482642	-0.134968	0.281201	0.000390707		-0.12405	0.0589178	0.129364	-0.170473	-0.11419	0.161275	-0.102897		-0.0325088	0.0336893	0.113363	0.0885762	0.250664	0.14112	0.194417		-0.0568943	0.418053	-0.131556	-0.311475	0.0708737	0.0631907	-0.0478272		0.722278	0.312687	0.026973	0.839161	0.844156	0.162837		-0.295329	0.319241	-0.184973	0.125003	-0.0427681	0.285209	-0.271204	0.255545
-2.17573	-0.97986	-0.0496292	-0.521165	0.537206	-0.0767935	0.166049	-0.0835641		-0.278603	0.00138696	0.0936056	-0.213452	-0.168356	0.134613	-0.0801719		-0.0216865	-0.023035	0.123985	0.0228799	0.171452	0.0979505	0.0899202		0.0442203	0.309148	-0.136916	-0.342396	0.0748233	-0.00412129	0.0130744		0.837163	0.376623	0.0799201	0.89011	0.649351	0.395604		-0.308242	0.254331	-0.201534	0.0986197	-0.0977682	0.229613	-0.258113	0.272795
-2.11297	-0.586498	-0.214194	-0.423966	0.53553	0.0696479	0.0268705	-0.156674		-0.385025	-0.0413691	0.0196274	-0.273953	-0.207194	0.046224	-0.0357257		0.00442854	-0.071377	0.173203	-0.0793948	0.106065	0.0287637	-0.0127173		0.0706402	0.127613	-0.154761	-0.290216	-0.044358	0.0523455	0.0313992		0.876124	0.517483	0.178821	0.773227	0.551449	0.718282		-0.337906	0.217396	-0.236514	0.0747972	-0.155458	0.169741	-0.27028	0.264293
-2.05021	0.111027	-0.363093	-0.328879	0.474722	0.255167	-0.0408145	-0.104943		-0.396002	-0.0330503	-0.0329449	-0.347706	-0.215785	-0.0864955	0.0160324		-0.0421499	-0.0605919	0.207072	-0.122411	0.085818	0.00559079	-0.0571268		0.0485148	0.0527436	-0.164733	-0.170627	-0.190412	0.100275	-0.0307003		0.526474	0.802198	0.164835	0.836164	0.643357	0.551449		-0.346949	0.256772	-0.257286	0.0576107	-0.175549	0.156117	-0.295455	0.202772
-1.98745	0.750153	-0.364233	-0.261892	0.402263	0.39194	-0.0397933	0.0703411		-0.332244	-0.00802635	-0.00946015	-0.418053	-0.19133	-0.20046	0.0685755		-0.192159	0.0109938	0.189759	-0.0542311	0.100128	0.0483155	-0.0407214		0.0183388	0.0958707	-0.166506	-0.0265267	-0.249525	0.0237273	-0.144032		0.12987	0.726274	0.0769231	0.201798	0.992008	0.177822		-0.238117	0.360472	-0.253609	0.06483	-0.134001	0.212519	-0.349094	0.147488
-1.92469	1.0017	-0.190257	-0.242809	0.384529	0.418614	-0.0385597	0.234393		-0.245667	-0.0300227	0.0904222	-0.46409	-0.148371	-0.24385	0.114897		-0.375384	0.0941772	0.135921	0.0816196	0.112237	0.102089	-0.00172509		0.0425687	0.101823	-0.165347	0.0923402	-0.187946	-0.154453	-0.239902		0.027972	0.435564	0.045954	0.023976	0.538462	0.041958		-0.128454	0.436346	-0.227236	0.0774087	-0.0994872	0.258429	-0.403096	0.133286
-1.86192	0.837793	0.0342852	-0.280686	0.4379	0.344043	-0.0670764	0.250676		-0.17031	-0.116743	0.208165	-0.471682	-0.107263	-0.224031	0.138733		-0.47904	0.132283	0.0939908	0.178898	0.0980296	0.0984565	0.0203117		0.193621	-0.0674326	-0.156314	0.161135	-0.0688443	-0.28646	-0.264785		0.040959	0.370629	0.0649351	0.018981	0.345654	0.02997		-0.125449	0.457919	-0.209555	0.113107	-0.0780148	0.262393	-0.435701	0.162697
-1.79916	0.550623	0.133444	-0.361463	0.492837	0.236746	-0.0642283	0.131671		-0.103738	-0.217729	0.276842	-0.441371	-0.0759157	-0.19301	0.124001		-0.451053	0.105836	0.098881	0.156555	0.0653341	0.0319336	0.0137493		0.48962	-0.365589	-0.134953	0.195896	0.0160564	-0.238244	-0.213521		0.145854	0.52048	0.181818	0.106893	0.524476	0.0949051		-0.177053	0.431473	-0.204979	0.11049	-0.100185	0.224262	-0.416285	0.190673
-1.7364	0.516796	0.0494149	-0.448128	0.449028	0.171767	0.055306	0.0384998		-0.0240837	-0.269792	0.277262	-0.386512	-0.0430215	-0.187224	0.0747015		-0.339915	0.0400339	0.141826	0.0226673	0.0355766	-0.0354972	-0.00493956		0.835783	-0.593243	-0.117351	0.231279	0.0267871	-0.022361	-0.121821		0.281718	0.544456	0.440559	0.441558	0.859141	0.666334		-0.242148	0.396409	-0.231243	0.107995	-0.145857	0.15975	-0.331747	0.257783
-1.67364	0.903285	-0.0904551	-0.50536	0.286744	0.179584	0.283852	0.115199		0.0831636	-0.263184	0.242416	-0.321217	0.00929992	-0.191161	0.0189707		-0.234557	-0.0239486	0.185875	-0.139502	0.0125541	-0.0467423	-0.0119348		1.06187	-0.595349	-0.130034	0.278606	-0.00491478	0.202069	-0.0358479		0.177822	0.26973	0.598402	0.641359	0.356643	0.555445		-0.208468	0.440436	-0.240578	0.111458	-0.195177	0.145096	-0.239127	0.348716
-1.61088	1.54395	-0.0973352	-0.527723	0.118745	0.235847	0.488455	0.330559		0.213105	-0.240489	0.210442	-0.248047	0.0848463	-0.1664	-0.0131695		-0.179413	-0.0624906	0.208313	-0.243977	-0.0253785	-0.0145997	0.00324007		1.05261	-0.413474	-0.169049	0.312527	-0.0209746	0.266036	0.0139397		0.025974	0.0549451	0.758242	0.365634	0.241758	0.337662		-0.126902	0.590228	-0.227118	0.118211	-0.194423	0.148979	-0.216818	0.37218
-1.54812	2.06927	0.0737931	-0.536686	0.104373	0.293225	0.514247	0.502998		0.346702	-0.233423	0.183908	-0.15825	0.165223	-0.109778	-0.0160631		-0.159704	-0.0803311	0.224498	-0.264031	-0.103312	-0.00406735	0.0326581		0.848513	-0.233461	-0.180599	0.307285	0.00682551	0.13982	0.0227065		0.00799201	0.00799201	0.875125	0.103896	0.463536	0.401598		-0.0533918	0.778987	-0.199002	0.161076	-0.195489	0.155197	-0.207351	0.359169
-1.48536	2.17442	0.251257	-0.543025	0.28908	0.322103	0.326491	0.487105		0.461097	-0.220499	0.14226	-0.0461895	0.22367	-0.0679664	-0.00818585		-0.158986	-0.0963413	0.26813	-0.232563	-0.224676	-0.0532934	0.0613597		0.604588	-0.1932	-0.105118	0.282063	0.0617559	-0.042554	0.0075594		0.016983	0.003996	0.411588	0.046953	0.865135	0.438561		-0.0330281	0.724142	-0.173997	0.188852	-0.221146	0.139833	-0.23548	0.301679
-1.42259	1.81818	0.201679	-0.516012	0.532802	0.325741	0.0462755	0.320227		0.536029	-0.164301	0.0869202	0.0761591	0.248718	-0.0862259	-0.00484821		-0.201581	-0.121573	0.348909	-0.192365	-0.368332	-0.126058	0.0833271		0.443917	-0.26194	0.0497066	0.294817	0.110631	-0.106493	-0.00498205		0.10989	0.010989	0.160839	0.137862	0.963037	0.298701		-0.0912884	0.580198	-0.151864	0.210979	-0.253716	0.116428	-0.220501	0.285839
-1.35983	1.22003	-0.128741	-0.402452	0.622454	0.324974	-0.157471	0.170543		0.557722	-0.0853524	0.0567724	0.181646	0.25479	-0.149486	0.00315046		-0.317517	-0.147964	0.432663	-0.151947	-0.504605	-0.151759	0.107462		0.364773	-0.312059	0.193146	0.380134	0.138575	0.00505557	0.00379026		0.548452	0.0999001	0.113886	0.737263	0.792208	0.118881		-0.216078	0.442221	-0.151406	0.230418	-0.272701	0.102544	-0.184047	0.334293
-1.29707	0.688595	-0.533787	-0.186035	0.475955	0.335718	-0.209758	0.150178		0.524499	-0.0732152	0.0883326	0.248454	0.268371	-0.188454	0.0369138		-0.474639	-0.154701	0.46686	-0.0889048	-0.609516	-0.107005	0.147981		0.301076	-0.284667	0.229239	0.499029	0.157122	0.182402	0.0320676		0.96004	0.308691	0.115884	0.586414	0.522478	0.0509491		-0.297785	0.403444	-0.124323	0.258118	-0.259699	0.108998	-0.158584	0.421599
-1.23431	0.430355	-0.722105	0.0738251	0.233356	0.362099	-0.167772	0.206577		0.45268	-0.20079	0.166804	0.280295	0.302023	-0.151035	0.0958623		-0.574602	-0.126217	0.428524	0.0096725	-0.668369	-0.0448216	0.208162		0.254592	-0.252292	0.156283	0.566116	0.18556	0.251253	0.0606693		0.823177	0.412587	0.108891	0.506494	0.539461	0.0509491		-0.316132	0.454118	-0.103121	0.295305	-0.225381	0.15604	-0.124291	0.438974
-1.17155	0.46935	-0.580088	0.272578	0.130326	0.40426	-0.135017	0.210891		0.376142	-0.427267	0.231792	0.305679	0.341446	-0.0614431	0.145003		-0.536089	-0.0676399	0.347721	0.117391	-0.678784	-0.0380528	0.273583		0.326965	-0.311786	0.0764245	0.534178	0.228897	0.130098	0.0716892		0.893107	0.375624	0.105894	0.795205	0.838162	0.116883		-0.27604	0.481731	-0.0826346	0.334843	-0.219589	0.183516	-0.148715	0.425153
-1.10879	0.695571	-0.26135	0.340626	0.271698	0.463036	-0.157352	0.132231		0.335092	-0.606954	0.238885	0.354855	0.359287	0.00179331	0.144301		-0.377302	-0.00414927	0.28176	0.18359	-0.65991	-0.10134	0.322391		0.597988	-0.442845	0.0933013	0.444436	0.272316	-0.100553	0.0654574		0.942058	0.272727	0.11988	0.851149	0.869131	0.268731		-0.24738	0.494222	-0.078383	0.314638	-0.219928	0.178241	-0.225113	0.416105
-1.04603	0.965712	-0.020449	0.299654	0.533552	0.53296	-0.206403	0.087666		0.357204	-0.615165	0.20883	0.434869	0.343607	-0.0116716	0.0919003		-0.200375	0.0373726	0.262063	0.179862	-0.654515	-0.178516	0.342771		0.991355	-0.507407	0.203206	0.383486	0.293745	-0.275734	0.0581896		0.633367	0.158841	0.155844	0.6004	0.858142	0.314685		-0.234386	0.578036	-0.108651	0.304989	-0.247376	0.186549	-0.246529	0.402973
-0.983264	1.17591	0.028228	0.242472	0.693846	0.596176	-0.242486	0.204861		0.441316	-0.468819	0.205952	0.525343	0.313562	-0.0710614	0.0322826		-0.0907491	0.0495365	0.262976	0.131344	-0.707135	-0.206232	0.339835		1.30422	-0.399197	0.301705	0.394745	0.282888	-0.294544	0.0635271		0.296703	0.0569431	0.161838	0.471528	0.903097	0.203796		-0.163236	0.658073	-0.13104	0.310199	-0.250281	0.181428	-0.230375	0.440174
-0.920502	1.28421	-0.0201068	0.256809	0.653588	0.633258	-0.262911	0.456392		0.555356	-0.311707	0.268905	0.597639	0.305795	-0.099952	0.0161084		-0.0435733	0.0482652	0.223644	0.099757	-0.827737	-0.180093	0.325701		1.39499	-0.174989	0.303303	0.447632	0.252883	-0.204095	0.0800115		0.123876	0.013986	0.108891	0.316683	0.766234	0.116883		-0.0938471	0.758697	-0.119332	0.317786	-0.281101	0.184459	-0.185466	0.488205
-0.857741	1.30333	-0.0114676	0.362381	0.517921	0.645211	-0.278815	0.662851		0.653751	-0.272768	0.373613	0.638223	0.342778	-0.0606854	0.0524565		0.00398969	0.0544482	0.1065	0.131987	-0.976384	-0.151941	0.305456		1.32973	-0.0143371	0.242332	0.499862	0.235395	-0.148404	0.098977		0.0949051	0.004995	0.028971	0.223776	0.902098	0.0789211		-0.0394284	0.850732	-0.0852601	0.360207	-0.295778	0.189575	-0.180886	0.53538
-0.794979	1.27926	0.0854863	0.509001	0.46086	0.660628	-0.267175	0.670361		0.706744	-0.343438	0.470122	0.654958	0.412209	0.00617937	0.104405		0.0819595	0.0721592	-0.0585171	0.22151	-1.09201	-0.168052	0.275983		1.31582	-0.0438775	0.239851	0.572914	0.259022	-0.235248	0.120947		0.142857	0.002997	0.010989	0.187812	0.89011	0.0579421		0.00181311	0.880741	-0.0360555	0.404287	-0.327607	0.1597	-0.236758	0.568677
-0.732218	1.25654	0.172508	0.622613	0.530471	0.712321	-0.180026	0.508028		0.722394	-0.402899	0.546064	0.663684	0.476859	0.0300625	0.131675		0.151482	0.0875065	-0.185128	0.317324	-1.14348	-0.221342	0.237997		1.48474	-0.210849	0.371091	0.73881	0.323586	-0.441747	0.156735		0.23976	0.002997	0.002997	0.232767	0.825175	0.035964		-0.00224233	0.860513	-0.0251569	0.45813	-0.36355	0.119799	-0.251476	0.605809
-0.669456	1.24499	0.178428	0.652163	0.60864	0.802245	-0.0152815	0.352274		0.743169	-0.361122	0.637275	0.671962	0.50586	-0.00950046	0.132229		0.163056	0.0897625	-0.192122	0.369144	-1.15323	-0.266884	0.203829		1.75963	-0.335519	0.581294	1.02254	0.391561	-0.636318	0.209254		0.301698	0.002997	0.001998	0.380619	0.998002	0.015984		0.00577998	0.842604	-0.00907947	0.466659	-0.38157	0.104929	-0.205753	0.689604
-0.606695	1.22348	0.174519	0.588329	0.561802	0.892787	0.138363	0.341364		0.816757	-0.261818	0.771813	0.677662	0.498802	-0.0605243	0.137766		0.128627	0.0895091	-0.06635	0.364581	-1.16906	-0.27422	0.187574		1.95248	-0.282597	0.743017	1.33585	0.409731	-0.68878	0.259775		0.284715	0.001998	0.000999001	0.567433	0.709291	0.00799201		0.0342702	0.870844	-0.0123915	0.481056	-0.384191	0.122428	-0.150439	0.770576
-0.543933	1.19188	0.296399	0.459919	0.406897	0.939114	0.156102	0.445447		0.962593	-0.232624	0.918558	0.682245	0.481961	-0.0565063	0.172517		0.111189	0.109929	0.124666	0.326629	-1.21356	-0.253252	0.187475		1.97658	-0.0779948	0.78726	1.53509	0.349109	-0.569616	0.281023		0.277722	0.000999001	0.001998	0.648352	0.582418	0.003996		0.0592934	0.936372	0.0132717	0.527901	-0.383097	0.157363	-0.0781132	0.818804
-0.481172	1.21701	0.557823	0.322346	0.305108	0.932475	-0.00712964	0.524653		1.1608	-0.33899	1.01013	0.701296	0.482994	0.0130117	0.226883		0.14319	0.159004	0.281967	0.283192	-1.26331	-0.230514	0.184588		1.93211	0.129484	0.760616	1.55502	0.230431	-0.360145	0.266948		0.33966	0.000999001	0.001998	0.688312	0.653347	0.00599401		0.0333708	0.969553	0.0671631	0.570018	-0.359279	0.197803	-0.0165324	0.828292
-0.41841	1.39551	0.784996	0.237617	0.39193	0.908275	-0.258074	0.493063		1.37088	-0.503905	1.01971	0.756352	0.509441	0.0976412	0.277402		0.179572	0.216175	0.347175	0.247199	-1.27628	-0.214118	0.165994		1.97464	0.200992	0.752795	1.47434	0.110632	-0.178489	0.24484		0.567433	0.00599401	0.000999001	0.765235	0.819181	0.00899101		-0.0309485	0.922266	0.089925	0.616769	-0.348299	0.221408	-0.0262855	0.822576
-0.355649	1.73456	0.774009	0.242122	0.632959	0.9079	-0.432074	0.399301		1.5611	-0.581507	1.00043	0.851755	0.549456	0.147895	0.3261		0.150959	0.253311	0.340294	0.227003	-1.23421	-0.193373	0.149937		2.13226	0.103037	0.791447	1.43733	0.0403533	-0.0934693	0.252443		0.884116	0.011988	0.000999001	0.889111	0.99001	0.010989		-0.0716365	0.929767	0.118357	0.657465	-0.338789	0.252626	-0.0488578	0.834172
-0.292887	2.06812	0.514626	0.319367	0.861187	0.934082	-0.425023	0.348079		1.72207	-0.503272	1.03473	0.959136	0.589295	0.169799	0.405957		0.0550702	0.268839	0.335975	0.245057	-1.15588	-0.168649	0.181118		2.29258	-0.0960703	0.83185	1.51661	0.0307003	-0.0958337	0.303474		0.806194	0.018981	0.000999001	0.965035	0.828172	0.013986		-0.0964438	0.907308	0.153683	0.713783	-0.321288	0.271327	-0.0322312	0.869648
-0.230126	2.13678	0.228614	0.408383	0.948769	0.949055	-0.265318	0.374816		1.85712	-0.339734	1.14778	1.03035	0.626791	0.211429	0.539113		-0.0289439	0.29382	0.402239	0.329027	-1.0744	-0.165687	0.292749		2.36879	-0.285557	0.843701	1.66641	0.0584198	-0.13597	0.379696		0.557443	0.02997	0.000999001	0.941059	0.578422	0.011988		-0.0555189	0.942401	0.242641	0.809638	-0.280442	0.325665	-0.0141029	0.921489
-0.167364	1.80867	0.16037	0.453297	0.924499	0.918998	-0.0689807	0.425184		1.96584	-0.21848	1.28714	1.03577	0.668133	0.301501	0.69529		-0.0260984	0.357694	0.554041	0.474187	-1.01009	-0.208724	0.470214		2.42753	-0.363038	0.872159	1.80698	0.0997695	-0.179157	0.456339		0.372627	0.046953	0.000999001	0.9001	0.368631	0.015984		-0.0965856	1.00875	0.342332	0.934406	-0.235995	0.394823	0.0391732	0.946111
-0.104603	1.24382	0.329859	0.454107	0.919518	0.856227	0.0598425	0.448953		2.03998	-0.19554	1.3963	0.998513	0.715656	0.413352	0.805718		0.052607	0.449408	0.756242	0.620943	-0.965255	-0.28244	0.655747		2.60123	-0.266093	0.98303	1.92631	0.155242	-0.223763	0.527723		0.261738	0.0799201	0.000999001	0.81019	0.344655	0.016983		-0.0931489	1.06485	0.427265	1.01682	-0.191933	0.456099	0.103753	1.00081
-0.041841	0.810369	0.509585	0.467392	1.01717	0.811145	0.0826899	0.476009		2.07267	-0.217273	1.49669	0.991518	0.763612	0.493755	0.827844		0.13605	0.519814	0.964902	0.689166	-0.933279	-0.332884	0.794773		2.88081	-0.00493987	1.15668	2.07307	0.240432	-0.273296	0.601943		0.257742	0.123876	0.000999001	0.619381	0.52048	0.012987		-0.0804748	1.17179	0.47091	1.05617	-0.145834	0.516105	0.182365	1.13409
0.0209205	0.786073	0.454284	0.551574	1.17846	0.820939	0.00710504	0.573678		2.0665	-0.197885	1.67512	1.091	0.807243	0.518798	0.794189		0.197537	0.527355	1.16467	0.65301	-0.898971	-0.314884	0.881199		3.06645	0.317068	1.27983	2.25987	0.357876	-0.302621	0.676035		0.273726	0.12987	0.000999001	0.476523	0.814186	0.011988		-0.0617079	1.20383	0.504281	1.07318	-0.109627	0.55454	0.281599	1.26926
0.083682	1.11126	0.145228	0.71006	1.3149	0.870985	-0.149201	0.74248		2.03234	-0.11058	1.98039	1.31748	0.852558	0.51049	0.788224		0.305246	0.479243	1.36999	0.585133	-0.830456	-0.237364	0.957535		3.00215	0.541027	1.28153	2.41882	0.486232	-0.263384	0.731249		0.257742	0.144855	0.000999001	0.3996	0.9001	0.00899101		0.0391901	1.20135	0.549665	1.15017	-0.0513576	0.606677	0.348044	1.3965
0.146444	1.44106	-0.199958	0.890802	1.41027	0.912202	-0.355339	0.891821		1.9874	0.00785855	2.34261	1.61199	0.911767	0.498553	0.866091		0.544852	0.423305	1.59558	0.61445	-0.687277	-0.155778	1.06964		2.87633	0.55326	1.2772	2.49089	0.602342	-0.129733	0.762259		0.136863	0.210789	0.000999001	0.312687	0.714286	0.00799201		0.104151	1.20571	0.635537	1.27213	0.0328823	0.664889	0.407632	1.43687
0.209205	1.46232	-0.348418	1.04252	1.54625	0.915709	-0.54403	0.941059		1.96133	0.123426	2.6143	1.87138	0.986069	0.478399	1.00331		0.898066	0.400481	1.82948	0.822779	-0.454775	-0.117005	1.22013		3.22707	0.373772	1.54038	2.55116	0.712202	0.0628115	0.804058		0.044955	0.412587	0.000999001	0.158841	0.642358	0.002997		0.0672532	1.23285	0.750025	1.4046	0.131014	0.77723	0.480057	1.56831
0.271967	1.17227	-0.263326	1.16815	1.80608	0.904102	-0.627991	0.931833		2.001	0.24401	2.70161	2.01964	1.0545	0.418984	1.12169		1.22525	0.411681	2.03479	1.17263	-0.173858	-0.113827	1.36409		4.54825	0.143422	2.28699	2.79674	0.85367	0.233055	0.912718		0.027972	0.685315	0.000999001	0.040959	0.846154	0.000999001		0.0961593	1.25436	0.820499	1.48404	0.232965	0.882948	0.641069	1.80085
0.334728	0.849028	-0.0954968	1.32019	2.17015	0.924465	-0.567178	1.0109		2.15211	0.381622	2.6525	2.05987	1.08436	0.311654	1.1675		1.38611	0.433553	2.17509	1.53606	0.0756296	-0.0960402	1.44764		6.81307	0.0128776	3.46222	3.36702	1.06261	0.319313	1.10932		0.0789211	0.665335	0.001998	0.010989	0.0779221	0.000999001		0.193843	1.37461	0.844438	1.51955	0.32499	0.974769	0.913554	2.25664
0.39749	0.755949	0.00439581	1.54478	2.52194	0.99378	-0.420692	1.28684		2.41657	0.499137	2.60989	2.06456	1.05684	0.199498	1.15858		1.36997	0.458058	2.23702	1.79879	0.234979	-0.0257132	1.45054		9.37096	0.0385666	4.7393	4.17526	1.33378	0.333614	1.34903		0.400599	0.342657	0.00699301	0.004995	0.000999001	0.000999001		0.364414	1.61499	0.818342	1.51095	0.37941	1.06785	1.25712	2.8389
0.460251	0.889153	0.0291854	1.8317	2.75561	1.07896	-0.313191	1.71104		2.72105	0.530186	2.67729	2.11226	0.984537	0.147852	1.1543		1.29091	0.502655	2.23042	1.94146	0.31291	0.0799691	1.39543		11.3573	0.181497	5.74129	4.95218	1.61512	0.346897	1.55867		0.85015	0.0729271	0.015984	0.004995	0.000999001	0.000999001		0.55251	1.8957	0.815865	1.52844	0.458795	1.12738	1.52865	3.27847
0.523013	1.01766	0.0682238	2.11495	2.86803	1.13477	-0.330849	2.11152		2.9403	0.464336	2.83111	2.22347	0.903312	0.184988	1.18643		1.2562	0.576654	2.17134	2.02601	0.366078	0.159294	1.32279		12.2821	0.388592	6.28652	5.48491	1.84161	0.412954	1.70835		0.411588	0.014985	0.020979	0.004995	0.000999001	0.000999001		0.73531	2.10152	0.844522	1.59276	0.491638	1.14523	1.73626	3.56694
0.585774	0.948028	0.156085	2.31359	2.9435	1.1568	-0.44288	2.3426		2.97575	0.38997	2.95827	2.34886	0.845912	0.277115	1.22869		1.26008	0.648432	2.06849	2.11315	0.430763	0.157235	1.26069		12.3013	0.647905	6.4503	5.8096	1.97739	0.505183	1.83533		0.298701	0.003996	0.018981	0.003996	0.000999001	0.000999001		0.799487	2.24164	0.848338	1.64351	0.487427	1.12366	1.8687	3.75048
0.648536	0.716917	0.215383	2.37079	3.05827	1.18797	-0.527794	2.39437		2.831	0.418871	2.96763	2.41747	0.821315	0.363335	1.23526		1.22032	0.663199	1.92537	2.20166	0.480224	0.0691255	1.21503		11.9761	0.953635	6.4252	6.14773	2.03025	0.535416	1.98651		0.28971	0.001998	0.004995	0.002997	0.000999001	0.000999001		0.814477	2.27038	0.884074	1.67002	0.44294	1.10793	1.95533	3.87042
0.711297	0.517143	0.163217	2.26755	3.20971	1.26877	-0.483349	2.36245		2.61532	0.556638	2.86007	2.40119	0.816806	0.410147	1.19982		1.10393	0.600745	1.75119	2.24694	0.45769	-0.0582178	1.18003		11.7864	1.23919	6.34325	6.64814	2.0318	0.444697	2.14204		0.266733	0.000999001	0.001998	0.000999001	0.000999001	0.000999001		0.797983	2.29484	0.865702	1.6659	0.360577	1.00923	2.02702	4.00838
0.774059	0.467841	0.0435495	2.02256	3.33497	1.3858	-0.319909	2.334		2.46402	0.666701	2.70205	2.33974	0.816595	0.427666	1.16567		0.986044	0.507719	1.56531	2.22552	0.350086	-0.16251	1.15108		11.8345	1.38478	6.22015	7.21269	2.00748	0.27862	2.21435		0.213786	0.000999001	0.000999001	0.001998	0.000999001	0.000999001		0.794868	2.30764	0.85208	1.6319	0.269701	0.917135	2.05232	4.09208
0.83682	0.50117	0.0109297	1.69294	3.38472	1.47855	-0.155772	2.32013		2.4403	0.58977	2.55076	2.30668	0.816368	0.437821	1.17572		0.969695	0.459677	1.38942	2.16689	0.218268	-0.206775	1.12792		11.932	1.31669	6.02777	7.59774	1.96308	0.166968	2.1369		0.172827	0.000999001	0.000999001	0.002997	0.000999001	0.000999001		0.804183	2.32554	0.84246	1.59341	0.220493	0.847727	2.00361	4.11051
0.899582	0.483866	0.167374	1.36677	3.36949	1.50152	-0.122839	2.28706		2.50078	0.308194	2.41321	2.34833	0.821074	0.439413	1.22112		1.06185	0.487053	1.23628	2.11946	0.145871	-0.196654	1.11162		11.8898	1.09493	5.77912	7.68197	1.89296	0.218452	1.94988		0.165834	0.000999001	0.000999001	0.00699301	0.000999001	0.000999001		0.725433	2.31087	0.828471	1.59025	0.212349	0.82823	1.86524	4.05226
0.962343	0.411648	0.434448	1.12907	3.33884	1.47667	-0.262182	2.21878		2.54755	-0.0189161	2.26579	2.44873	0.832781	0.412711	1.24877		1.1516	0.545713	1.10601	2.09646	0.161041	-0.167938	1.10382		11.6962	0.88279	5.53433	7.60749	1.79516	0.427199	1.7811		0.202797	0.000999001	0.000999001	0.00799201	0.000999001	0.000999001		0.633637	2.27663	0.809713	1.57877	0.217763	0.841893	1.80481	3.99195
1.0251	0.433748	0.613347	1.01283	3.32767	1.47777	-0.487535	2.12659		2.5123	-0.195796	2.09401	2.54776	0.844792	0.353862	1.22033		1.11569	0.567721	0.991869	2.06709	0.217276	-0.157233	1.10905		11.4586	0.817511	5.34694	7.64048	1.67859	0.679655	1.72996		0.234765	0.000999001	0.000999001	0.00699301	0.000999001	0.000999001		0.570085	2.25501	0.758888	1.53876	0.220502	0.84688	1.77576	3.93724
1.08787	0.67103	0.577977	0.977626	3.32895	1.55826	-0.639847	2.01023		2.39762	-0.165319	1.90681	2.5928	0.848552	0.292016	1.15628		0.932714	0.537685	0.887633	2.00044	0.252768	-0.176338	1.1338		11.2493	0.910251	5.22766	7.90464	1.56077	0.854283	1.77283		0.265734	0.000999001	0.000999001	0.002997	0.000999001	0.000999001		0.58679	2.20121	0.716757	1.47642	0.186144	0.814285	1.8067	4.00031
1.15063	1.0398	0.397273	0.944862	3.31455	1.69424	-0.597204	1.84359		2.25186	-0.0412748	1.72472	2.57735	0.84407	0.264127	1.11495		0.687131	0.508004	0.790118	1.90669	0.258176	-0.207351	1.18024		11.0486	1.06996	5.15843	8.2741	1.46283	0.918464	1.79224		0.31968	0.000999001	0.000999001	0.001998	0.000999001	0.000999001		0.496065	2.21217	0.689648	1.42083	0.148576	0.75962	1.82152	4.11462
1.21339	1.29566	0.261129	0.863491	3.27541	1.80081	-0.370045	1.61783		2.11762	0.026299	1.56834	2.53572	0.840765	0.275716	1.12887		0.477239	0.533336	0.698118	1.82639	0.274962	-0.221695	1.24079		10.8209	1.21054	5.12094	8.52985	1.40567	0.93506	1.70089		0.387612	0.000999001	0.000999001	0.001998	0.000999001	0.000999001		0.43386	2.09482	0.685897	1.39967	0.140099	0.751906	1.81003	4.16625
1.27615	1.26607	0.296925	0.745539	3.23886	1.80697	-0.110834	1.3849		2.00719	0.000370325	1.45708	2.50368	0.847406	0.29499	1.1686		0.340088	0.597796	0.61255	1.78415	0.3296	-0.207471	1.30017		10.5945	1.32107	5.09947	8.59593	1.40425	0.983278	1.52889		0.501499	0.000999001	0.000999001	0.001998	0.000999001	0.000999001		0.399771	1.99212	0.691453	1.3978	0.155911	0.764379	1.732	4.10751
1.33891	1.02676	0.470326	0.640107	3.24744	1.71787	-0.0113031	1.23078		1.91682	-0.0360038	1.40313	2.4848	0.862748	0.289258	1.17347		0.262246	0.620687	0.538223	1.76507	0.385565	-0.18039	1.34364		10.4359	1.43858	5.06856	8.59984	1.45815	1.07829	1.38415		0.612388	0.000999001	0.000999001	0.000999001	0.000999001	0.000999001		0.390111	1.91438	0.672528	1.40055	0.174975	0.785948	1.70773	4.07599
1.40167	0.834963	0.6543	0.578473	3.31886	1.60795	-0.145157	1.19431		1.84916	-0.00513835	1.39566	2.45379	0.877823	0.262304	1.11534		0.230161	0.540461	0.482728	1.74115	0.374392	-0.166904	1.36366		10.3582	1.57916	5.00103	8.71148	1.54402	1.16393	1.3349		0.634366	0.001998	0.000999001	0.000999001	0.000999001	0.000999001		0.385774	1.89535	0.654518	1.37877	0.144416	0.767327	1.74637	4.1089
1.46444	0.89057	0.762821	0.549264	3.4214	1.55615	-0.38373	1.22468		1.81388	0.0623409	1.39812	2.39126	0.887643	0.249356	1.02666		0.238949	0.387054	0.450337	1.71044	0.272911	-0.176014	1.3604		10.2888	1.71516	4.8969	8.95807	1.61925	1.17286	1.34567		0.586414	0.000999001	0.000999001	0.000999001	0.000999001	0.000999001		0.396262	1.91146	0.624954	1.35624	0.0989621	0.735103	1.79117	4.22732
1.5272	1.16871	0.79641	0.522999	3.48751	1.58576	-0.482741	1.23429		1.80998	0.0651247	1.37847	2.31288	0.89929	0.27531	0.964574		0.257956	0.26156	0.436043	1.69619	0.136816	-0.189998	1.3384		10.1446	1.80994	4.79209	9.21775	1.64049	1.08646	1.33181		0.513487	0.000999001	0.000999001	0.000999001	0.000999001	0.000999001		0.394927	1.92057	0.602066	1.32841	0.0444497	0.688168	1.79323	4.26697
1.58996	1.47576	0.776469	0.489043	3.46004	1.65895	-0.295661	1.19106		1.81591	-0.0415115	1.34896	2.2604	0.926847	0.324715	0.952184		0.226453	0.241409	0.427093	1.70636	0.0488858	-0.185336	1.30382		9.92682	1.84808	4.72256	9.37499	1.58874	0.941883	1.26219		0.473526	0.001998	0.000999001	0.000999001	0.000999001	0.000999001		0.412083	1.94416	0.58267	1.30959	0.0309569	0.676952	1.70749	4.2791
1.65272	1.64426	0.683765	0.461866	3.33748	1.72018	0.0713789	1.14373		1.80092	-0.182309	1.36521	2.26045	0.977374	0.35839	0.960024		0.114447	0.309408	0.412282	1.70925	0.0379643	-0.160971	1.26233		9.72056	1.82237	4.67912	9.44209	1.48457	0.795462	1.18969		0.436563	0.001998	0.000999001	0.001998	0.000999001	0.000999001		0.405853	1.97059	0.568846	1.33349	0.0511752	0.688813	1.62451	4.21189
1.71548	1.66119	0.495173	0.459114	3.17999	1.74179	0.329147	1.15142		1.74555	-0.237396	1.46962	2.29204	1.04177	0.357212	0.944482		-0.0192358	0.378125	0.390501	1.66513	0.0584911	-0.140647	1.21577		9.59776	1.71605	4.61039	9.51226	1.3798	0.688611	1.1789		0.435564	0.000999001	0.000999001	0.00699301	0.000999001	0.000999001		0.398817	1.98986	0.572666	1.3549	0.0503187	0.685427	1.58606	4.20764
1.77824	1.62729	0.267862	0.488391	3.06688	1.73363	0.264577	1.20411		1.65191	-0.16878	1.63298	2.30023	1.10009	0.341626	0.898309		-0.0622997	0.378701	0.370006	1.58287	0.0509443	-0.144966	1.1596		9.53851	1.53261	4.47944	9.62087	1.32651	0.641431	1.22143		0.511489	0.000999001	0.000999001	0.00699301	0.000999001	0.000999001		0.35432	1.93866	0.579393	1.33869	0.0304254	0.657503	1.54295	4.19411
1.841	1.63143	0.141378	0.557989	3.04015	1.71992	-0.0474395	1.23184		1.54008	-0.0541204	1.76524	2.24857	1.13753	0.342904	0.8582		0.0362621	0.319109	0.359347	1.52966	0.0119085	-0.165683	1.08705		9.46286	1.34677	4.3119	9.69558	1.34164	0.658981	1.24153		0.645355	0.000999001	0.000999001	0.00599401	0.000999001	0.000999001		0.298064	1.88106	0.593829	1.35296	-0.00760411	0.636028	1.50519	4.19199
1.90377	1.68642	0.221673	0.682403	3.0846	1.71374	-0.29976	1.19166		1.43977	0.00512814	1.79793	2.15993	1.15721	0.358176	0.863346		0.195076	0.25777	0.359187	1.56942	-0.00586122	-0.175017	1.00009		9.33384	1.28966	4.17635	9.65596	1.39358	0.728125	1.18584		0.731269	0.000999001	0.000999001	0.00599401	0.000999001	0.000999001		0.290821	1.82825	0.592387	1.36315	-0.033957	0.625471	1.48204	4.1925
1.96653	1.77099	0.466175	0.854211	3.15979	1.7124	-0.243545	1.12417		1.38222	-0.00964648	1.75625	2.09995	1.1787	0.341825	0.911253		0.264517	0.232787	0.362161	1.68955	0.0395951	-0.162171	0.917121		9.2073	1.43997	4.11395	9.53486	1.42466	0.811168	1.09094		0.685315	0.000999001	0.000999001	0.00699301	0.000999001	0.000999001		0.34375	1.87529	0.582494	1.39998	-0.0262188	0.644185	1.47111	4.12315
2.02929	1.89793	0.710011	1.00829	3.24454	1.70976	0.0648443	1.10618		1.3876	-0.0331004	1.73853	2.1122	1.22289	0.247378	0.957816		0.167698	0.22815	0.358569	1.79944	0.125	-0.153919	0.866034		9.16773	1.72081	4.09484	9.46483	1.39631	0.860313	1.04728		0.486513	0.000999001	0.000999001	0.00899101	0.000999001	0.000999001		0.400094	1.95315	0.575997	1.41724	-0.0343872	0.640042	1.47156	4.08769
2.09205	2.11973	0.821531	1.04008	3.34235	1.70696	0.31335	1.1536		1.44949	-0.0107897	1.81602	2.16698	1.29487	0.0787926	0.960421		-0.0334242	0.206592	0.340655	1.81106	0.182809	-0.190378	0.864099		9.22577	1.93371	4.05087	9.53616	1.32096	0.854213	1.09858		0.321678	0.000999001	0.000999001	0.012987	0.000999001	0.000999001		0.439114	2.03772	0.563466	1.40679	-0.0640291	0.637459	1.4975	4.11332
2.15481	2.47378	0.822984	0.893015	3.44461	1.71082	0.240468	1.19368		1.53269	0.0312904	1.95577	2.17998	1.37847	-0.101575	0.919162		-0.217892	0.160958	0.302901	1.72193	0.172806	-0.278387	0.902234		9.29967	1.93019	3.94769	9.68972	1.25202	0.821656	1.19028		0.297702	0.000999001	0.000999001	0.012987	0.000999001	0.000999001		0.452481	2.02118	0.547755	1.39273	-0.118272	0.575746	1.50284	4.16212
2.21757	2.93788	0.843115	0.639371	3.50565	1.7247	-0.106454	1.14622		1.59784	0.02683	2.05004	2.09004	1.44708	-0.217313	0.875765		-0.337295	0.121697	0.243009	1.61473	0.123056	-0.374651	0.949928		9.30332	1.75753	3.81608	9.77226	1.23795	0.818668	1.22489		0.396603	0.000999001	0.000999001	0.00899101	0.000999001	0.000999001		0.41266	1.95486	0.524075	1.36996	-0.189704	0.52559	1.45149	4.20833
2.28033	3.44205	0.955504	0.454813	3.47514	1.74248	-0.421541	1.02155		1.63818	-0.0338436	2.02292	1.92252	1.48303	-0.232508	0.873626		-0.449372	0.116838	0.16726	1.57506	0.0959464	-0.42155	0.978022		9.23472	1.61743	3.71118	9.69716	1.28087	0.872277	1.162		0.539461	0.000999001	0.000999001	0.00899101	0.000999001	0.000999001		0.302314	1.88732	0.489602	1.36645	-0.218045	0.501426	1.42174	4.21766
2.3431	3.91468	1.0865	0.481406	3.36126	1.74983	-0.445301	0.917691		1.69008	-0.074277	1.90225	1.77277	1.49092	-0.168762	0.91868		-0.623883	0.137243	0.0951396	1.61381	0.119405	-0.400602	0.978648		9.1566	1.66434	3.64972	9.53572	1.33773	0.945959	1.05391		0.609391	0.000999001	0.000999001	0.00899101	0.000999001	0.000999001		0.249054	1.85336	0.473988	1.38642	-0.221168	0.495865	1.4043	4.16253
2.40586	4.31352	1.09753	0.6991	3.24599	1.7296	-0.212559	0.914916		1.7968	-0.0143998	1.78363	1.72143	1.49438	-0.0780819	0.976042		-0.841436	0.148432	0.0536582	1.67019	0.158716	-0.347742	0.965129		9.09253	1.84723	3.59525	9.44372	1.36202	0.966436	0.98394		0.577423	0.000999001	0.000999001	0.010989	0.000999001	0.000999001		0.247456	1.91907	0.496986	1.40504	-0.197612	0.503958	1.36759	4.10756
2.46862	4.62402	0.947136	0.938556	3.21598	1.66871	-0.000128354	0.987023		1.9538	0.126809	1.73076	1.76317	1.51875	-0.00537347	1.00154		-1.00751	0.130557	0.0604642	1.68142	0.155578	-0.315566	0.95567		8.97141	1.96069	3.50088	9.50841	1.3444	0.889736	0.981767		0.545455	0.000999001	0.000999001	0.013986	0.000999001	0.000999001		0.277191	1.96545	0.54453	1.40288	-0.202685	0.513971	1.35096	4.09659
2.53138	4.84252	0.747712	1.03517	3.27194	1.56635	-0.0455132	1.0322		2.09248	0.231629	1.72108	1.81877	1.57361	0.0269213	0.97727		-1.05969	0.0960948	0.10922	1.63801	0.0884055	-0.324437	0.959688		8.70433	1.85231	3.3551	9.67665	1.3125	0.74237	1.00686		0.63037	0.000999001	0.000999001	0.014985	0.000999001	0.000999001		0.296871	1.946	0.581951	1.45875	-0.20438	0.498029	1.32833	4.11609
2.59414	4.96437	0.653288	0.977056	3.32101	1.44128	-0.331345	0.989303		2.12786	0.197156	1.68924	1.81602	1.64887	0.0128421	0.921252		-1.03524	0.0672669	0.173159	1.57056	-0.00846506	-0.352896	0.978164		8.31708	1.57013	3.18198	9.82394	1.29401	0.598284	1.00642		0.804196	0.000999001	0.000999001	0.012987	0.000999001	0.000999001		0.240694	1.84225	0.59725	1.44999	-0.201621	0.496283	1.28318	4.0962
2.6569	4.98045	0.706494	0.900113	3.27574	1.33032	-0.636384	0.907283		2.02995	0.0434282	1.61098	1.75559	1.72588	-0.0414988	0.866974		-1.02119	0.0476677	0.226609	1.49675	-0.0792206	-0.370794	1.01011		7.97781	1.30659	3.0066	9.87324	1.2855	0.517862	0.972231		0.95005	0.000999001	0.000999001	0.012987	0.000999001	0.000999001		0.11669	1.74684	0.555505	1.37792	-0.216633	0.486973	1.23206	4.04184
2.71967	4.88283	0.813598	0.93948	3.15962	1.27205	-0.765089	0.889998		1.85006	-0.100984	1.531	1.69675	1.79196	-0.111308	0.833481		-1.05577	0.0273365	0.264499	1.39834	-0.0934591	-0.372436	1.05078		7.86243	1.2145	2.83413	9.83985	1.26109	0.51039	0.934078		0.938062	0.001998	0.000999001	0.013986	0.000999001	0.000999001		0.0337431	1.80589	0.498807	1.326	-0.241845	0.463825	1.20457	3.98669
2.78243	4.68162	0.86423	1.0952	3.09622	1.28155	-0.70345	0.980491		1.67581	-0.122906	1.50883	1.68454	1.84489	-0.152887	0.811766		-1.10321	0.0124688	0.299227	1.25398	-0.0624301	-0.37394	1.0818		7.98541	1.29262	2.66445	9.77962	1.2086	0.549731	0.910165		0.746254	0.000999001	0.000999001	0.015984	0.000999001	0.000999001		0.046018	1.87914	0.477281	1.31033	-0.274546	0.472307	1.18267	3.94275
2.84519	4.42106	0.848738	1.24903	3.17796	1.33483	-0.566871	1.1141		1.56094	-0.0305393	1.55028	1.70015	1.88585	-0.12818	0.777629		-1.12152	0.0334224	0.336992	1.08333	-0.0211996	-0.386108	1.0707		8.1787	1.43721	2.51453	9.72079	1.14939	0.61307	0.883654		0.545455	0.000999001	0.000999001	0.031968	0.000999001	0.000999001		0.128071	1.98304	0.492515	1.33069	-0.293144	0.475805	1.17742	3.8922
2.90795	4.16583	0.840745	1.3031	3.34941	1.37944	-0.445173	1.18703		1.49824	0.062418	1.60227	1.68617	1.91137	-0.0412578	0.71873		-1.12232	0.109292	0.359498	0.944761	-0.00274578	-0.401567	0.992107		8.2511	1.56695	2.41414	9.65308	1.11734	0.692741	0.833291		0.426573	0.000999001	0.000999001	0.034965	0.000999001	0.000999001		0.223853	1.99779	0.498274	1.33	-0.291025	0.473395	1.14698	3.82345
2.97071	3.94963	0.880807	1.28217	3.43882	1.36793	-0.335374	1.15734		1.45398	0.0496782	1.61124	1.61308	1.91525	0.0520872	0.651173		-1.13927	0.206939	0.334714	0.884901	-0.0230051	-0.410917	0.857959		8.16369	1.67135	2.37986	9.56366	1.1211	0.771612	0.772846		0.406593	0.000999001	0.000999001	0.033966	0.000999001	0.000999001		0.305262	1.9912	0.482479	1.32095	-0.264154	0.447522	1.1359	3.82635
3.03347	3.73239	0.914281	1.29062	3.31987	1.29046	-0.21269	1.06785		1.41572	-0.0747371	1.57429	1.51016	1.89843	0.0836021	0.608656		-1.15371	0.251301	0.25081	0.894614	-0.075602	-0.421153	0.726128		8.03702	1.75446	2.4026	9.46135	1.13422	0.803527	0.742232		0.396603	0.000999001	0.000999001	0.027972	0.000999001	0.000999001		0.268611	1.93202	0.433819	1.28132	-0.275355	0.395851	1.09131	3.83851
3.09623	3.43057	0.863388	1.38208	3.04259	1.18056	-0.115379	0.978618		1.39834	-0.225886	1.52775	1.4295	1.87468	0.0329263	0.611008		-1.09433	0.191086	0.139844	0.917816	-0.132607	-0.446065	0.670175		7.99223	1.78011	2.46401	9.36552	1.12581	0.739829	0.756645		0.435564	0.000999001	0.000999001	0.023976	0.000999001	0.000999001		0.268245	1.8426	0.39927	1.23528	-0.308959	0.354906	1.07304	3.81958
3.159	3.01687	0.741561	1.49473	2.7976	1.08977	-0.119458	0.898615		1.40915	-0.312046	1.49484	1.39019	1.86293	-0.0485632	0.640165		-0.933308	0.0560846	0.063095	0.900679	-0.158443	-0.478203	0.728181		8.01457	1.70583	2.5563	9.2892	1.09566	0.588209	0.777909		0.538462	0.000999001	0.000999001	0.01998	0.000999001	0.000999001		0.211474	1.76289	0.390997	1.20963	-0.361792	0.321499	1.07232	3.80111
3.22176	2.58987	0.658702	1.52371	2.74764	1.05259	-0.236165	0.794349		1.42432	-0.303194	1.45846	1.36962	1.87209	-0.0794892	0.649424		-0.760192	-0.0592547	0.0661147	0.829496	-0.13967	-0.482682	0.871621		7.99782	1.55843	2.67553	9.24322	1.07163	0.441675	0.749807		0.699301	0.000999001	0.000999001	0.016983	0.000999001	0.000999001		0.127049	1.72126	0.421778	1.19841	-0.366425	0.303633	1.01498	3.806
3.28452	2.31522	0.695351	1.44307	2.89394	1.06967	-0.371851	0.652461		1.41218	-0.231275	1.38849	1.34757	1.89314	-0.0209244	0.603048		-0.717593	-0.0774457	0.142837	0.725983	-0.109441	-0.430821	1.02173		7.91201	1.43759	2.79754	9.24285	1.07153	0.431245	0.661618		0.861139	0.002997	0.000999001	0.014985	0.000999001	0.000999001		0.0414116	1.63735	0.3987	1.17959	-0.317992	0.359338	1.00914	3.7764
3.34728	2.27166	0.789835	1.33484	3.10015	1.119	-0.41382	0.510066		1.3767	-0.147755	1.28509	1.34219	1.90652	0.0891651	0.511945		-0.847283	-0.00553514	0.241275	0.617601	-0.134562	-0.339599	1.10226		7.8823	1.42322	2.87487	9.28773	1.0749	0.62688	0.565709		0.903097	0.004995	0.000999001	0.012987	0.000999001	0.000999001		-0.0465077	1.62935	0.39541	1.1678	-0.26941	0.420081	1.02791	3.7846
3.41004	2.36224	0.78302	1.29351	3.23049	1.17899	-0.346319	0.414128		1.36319	-0.0923521	1.18254	1.38718	1.89788	0.17301	0.429497		-1.0248	0.0786006	0.303827	0.519325	-0.262189	-0.266709	1.08876		8.0623	1.49274	2.86953	9.33222	1.04072	0.968189	0.525106		0.887113	0.004995	0.000999001	0.012987	0.000999001	0.000999001		-0.122121	1.66001	0.388323	1.15544	-0.247252	0.435366	1.09019	3.78999
3.4728	2.40808	0.589416	1.31721	3.25321	1.24014	-0.259432	0.364167		1.41037	-0.0896493	1.10932	1.47548	1.86749	0.184052	0.406862		-1.07932	0.104628	0.303318	0.43792	-0.469161	-0.257298	1.01905		8.43063	1.55206	2.78802	9.29889	0.952945	1.29042	0.548231		0.896104	0.00599401	0.000999001	0.00999001	0.000999001	0.000999001		-0.130073	1.68778	0.383346	1.14418	-0.284377	0.415528	1.10999	3.92545
3.53556	2.34252	0.310163	1.30945	3.22128	1.29758	-0.241715	0.313867		1.50029	-0.149161	1.05461	1.54425	1.82689	0.140983	0.447829		-0.979209	0.0712663	0.244596	0.380032	-0.666218	-0.29701	0.960973		8.75181	1.5451	2.67607	9.1482	0.841295	1.43303	0.584289		0.992008	0.00699301	0.000999001	0.00599401	0.000999001	0.000999001		-0.127504	1.68826	0.374444	1.14782	-0.346027	0.37927	1.11619	3.87239
3.59833	2.28598	0.153702	1.18611	3.1834	1.33943	-0.286234	0.232322		1.56707	-0.252009	0.983867	1.53309	1.78945	0.094433	0.507283		-0.868986	0.0325451	0.140443	0.348259	-0.761765	-0.325598	0.963008		8.77732	1.50624	2.57739	8.93743	0.752195	1.34784	0.583488		0.843157	0.00899101	0.000999001	0.00699301	0.000999001	0.000999001		-0.122843	1.61137	0.371153	1.13268	-0.395386	0.361701	1.06033	3.82542
3.66109	2.39058	0.23536	0.9637	3.13859	1.34934	-0.318841	0.149445		1.56151	-0.344392	0.887051	1.45718	1.76477	0.0675079	0.536079		-0.900038	0.0328948	-0.00346227	0.333791	-0.730538	-0.300709	1.02218		8.49202	1.4911	2.50543	8.78829	0.702812	1.12403	0.551863		0.802198	0.00999001	0.000999001	0.00699301	0.000999001	0.000999001		-0.124557	1.535	0.339557	1.13053	-0.396163	0.368712	0.976276	3.71746
3.72385	2.60886	0.461671	0.732606	3.07168	1.32322	-0.30475	0.12707		1.50201	-0.365926	0.803603	1.40686	1.75877	0.0367477	0.528115		-1.03954	0.0651516	-0.175585	0.321941	-0.625405	-0.243728	1.08904		8.14112	1.48047	2.45921	8.77303	0.671706	0.916427	0.537769		0.84016	0.015984	0.000999001	0.00899101	0.000999001	0.000999001		-0.149026	1.55702	0.304943	1.12431	-0.350657	0.380246	0.917713	3.65104
3.78661	2.66355	0.619362	0.554692	3.00228	1.28007	-0.29462	0.18668		1.45372	-0.301509	0.79242	1.4599	1.77322	-0.0281702	0.521901		-1.08302	0.0918975	-0.33771	0.306953	-0.525579	-0.216809	1.10533		7.99666	1.39435	2.45407	8.83064	0.636037	0.839081	0.56749		0.869131	0.014985	0.000999001	0.00899101	0.000999001	0.000999001		-0.150496	1.59462	0.29827	1.12345	-0.347563	0.389438	0.884056	3.6365
3.84937	2.3028	0.576236	0.408682	2.97233	1.24919	-0.35084	0.277622		1.45778	-0.205973	0.875033	1.59293	1.80137	-0.115465	0.555096		-0.873952	0.0970078	-0.432269	0.295504	-0.474042	-0.255536	1.04879		8.1004	1.21396	2.51414	8.81142	0.608368	0.905166	0.607093		0.795205	0.012987	0.000999001	0.00999001	0.000999001	0.000999001		-0.144226	1.58741	0.338612	1.15341	-0.37007	0.374169	0.886959	3.65448
3.91213	1.59957	0.390855	0.244331	2.98632	1.2417	-0.448738	0.322807		1.48985	-0.165801	1.00822	1.69014	1.82566	-0.173214	0.619641		-0.493474	0.10489	-0.424457	0.291509	-0.459866	-0.330764	0.953237		8.24651	1.05467	2.62383	8.61866	0.624708	1.04598	0.597259		0.608392	0.013986	0.000999001	0.00699301	0.000999001	0.000999001		-0.178169	1.52943	0.351094	1.21182	-0.394253	0.360458	0.903316	3.67682
3.9749	0.962112	0.231523	0.0750322	2.98493	1.23578	-0.483636	0.28985		1.4942	-0.22407	1.11178	1.64877	1.82515	-0.16309	0.664958		-0.204835	0.147963	-0.341255	0.282487	-0.449658	-0.380293	0.885968		8.20995	1.069	2.70108	8.30726	0.694087	1.17547	0.522687		0.482517	0.021978	0.000999001	0.00699301	0.000999001	0.000999001		-0.225298	1.49746	0.367307	1.25028	-0.406654	0.340351	0.924594	3.64904
4.03766	0.799429	0.202261	-0.00688978	2.89503	1.19632	-0.385709	0.210259		1.45205	-0.338288	1.12466	1.47723	1.7899	-0.10468	0.646462		-0.203497	0.223683	-0.261473	0.249955	-0.425958	-0.373701	0.895498		7.96889	1.26282	2.64676	8.03742	0.770348	1.24064	0.436026		0.467532	0.046953	0.000999001	0.00699301	0.000999001	0.000999001		-0.292279	1.46919	0.342971	1.21494	-0.369702	0.33038	0.907457	3.58895
4.10042	1.15365	0.254815	0.082783	2.70594	1.11518	-0.207683	0.134114		1.40328	-0.415208	1.04189	1.2866	1.7298	-0.0571077	0.569143		-0.437332	0.291138	-0.254969	0.194956	-0.395447	-0.339395	0.969767		7.69331	1.44129	2.43848	7.92999	0.786653	1.22839	0.40599		0.556444	0.0649351	0.000999001	0.00699301	0.000999001	0.000999001		-0.343356	1.41794	0.287984	1.1694	-0.328497	0.351154	0.918214	3.51538
4.16318	1.66636	0.260637	0.324495	2.48829	1.03177	-0.0752056	0.0810733		1.39573	-0.393675	0.909007	1.18652	1.66793	-0.056021	0.481711		-0.681461	0.308997	-0.322996	0.144598	-0.3708	-0.328376	1.04252		7.53939	1.38199	2.171	7.96879	0.721701	1.1479	0.444102		0.646354	0.0699301	0.000999001	0.00699301	0.000999001	0.000999001		-0.351713	1.42319	0.220503	1.12814	-0.316159	0.360289	0.849923	3.44952
4.22594	1.91056	0.152444	0.594894	2.33571	1.00725	-0.0506572	0.0431343		1.42391	-0.29858	0.787268	1.1925	1.62409	-0.0776225	0.429267		-0.773381	0.271214	-0.39726	0.124067	-0.355605	-0.359681	1.04786		7.49449	1.07573	1.98712	8.03793	0.625915	1.02319	0.489604		0.696304	0.0699301	0.000999001	0.00799201	0.000999001	0.000999001		-0.372322	1.42198	0.184159	1.08131	-0.355512	0.314438	0.77064	3.40698
4.2887	1.74889	-0.00810301	0.761947	2.29135	1.07001	-0.0663945	0.0227019		1.43414	-0.214793	0.718387	1.23186	1.60379	-0.0727508	0.414936		-0.751727	0.204922	-0.401942	0.123536	-0.347645	-0.407574	0.978284		7.4364	0.772479	1.95709	8.03886	0.575936	0.901198	0.470361		0.684316	0.0529471	0.000999001	0.012987	0.000999001	0.000999001		-0.350542	1.40733	0.167079	1.06807	-0.400842	0.274871	0.682119	3.34386
4.35146	1.37135	-0.0886828	0.77735	2.32766	1.18271	-0.00577443	0.0442243		1.39536	-0.205249	0.707776	1.22796	1.60109	-0.0325951	0.408536		-0.768822	0.140848	-0.32192	0.103516	-0.348413	-0.437547	0.893298		7.31149	0.758736	2.02612	7.96174	0.604139	0.846658	0.377416		0.73027	0.024975	0.000999001	0.01998	0.001998	0.000999001		-0.323374	1.42196	0.152583	1.07035	-0.441881	0.2683	0.639062	3.3165
4.41423	1.02226	-0.00125605	0.683802	2.38197	1.266	0.159488	0.115969		1.35254	-0.250309	0.729639	1.16713	1.60829	-0.00712492	0.38829		-0.902777	0.0931815	-0.213763	0.0403724	-0.362366	-0.442818	0.867373		7.20609	1.08025	2.08188	7.85601	0.677732	0.902116	0.277474		0.925075	0.010989	0.000999001	0.024975	0.001998	0.000999001		-0.265725	1.46776	0.146788	1.05603	-0.44483	0.2752	0.649346	3.38157
4.47699	0.746294	0.228393	0.553057	2.39838	1.26195	0.33016	0.191184		1.39224	-0.266318	0.747273	1.08687	1.61977	-0.0488185	0.36743		-1.0856	0.0654735	-0.151437	-0.0386501	-0.388666	-0.439498	0.923213		7.22762	1.49244	2.06875	7.76026	0.746321	1.03836	0.251634		0.863137	0.002997	0.001998	0.02997	0.000999001	0.000999001		-0.157492	1.58445	0.116338	1.03103	-0.488309	0.295297	0.689535	3.42436
4.53975	0.421596	0.4783	0.433453	2.34264	1.18069	0.378888	0.190644		1.54843	-0.187794	0.736245	1.01756	1.62764	-0.142883	0.377207		-1.20523	0.0632942	-0.160481	-0.0778315	-0.420193	-0.433966	1.01235		7.34743	1.68789	2.0293	7.67891	0.800402	1.15245	0.320508		0.831169	0.002997	0.000999001	0.01998	0.000999001	0.000999001		-0.120044	1.59062	0.111924	1.00813	-0.48977	0.31046	0.728593	3.43181
4.60251	-0.00363458	0.606095	0.350019	2.20374	1.08774	0.274474	0.0793449		1.75049	-0.0372936	0.695461	0.953498	1.61987	-0.20799	0.42753		-1.23689	0.0898504	-0.201816	-0.0558315	-0.45251	-0.409928	1.06137		7.40447	1.56584	2.03819	7.61531	0.873332	1.13916	0.424566		0.934066	0.01998	0.000999001	0.010989	0.000999001	0.000999001		-0.217509	1.48262	0.134271	1.00103	-0.461235	0.328069	0.799113	3.44512
4.66527	-0.381984	0.531847	0.325937	2.00415	1.04471	0.100274	-0.08142		1.87653	0.0845693	0.638286	0.879885	1.58872	-0.176185	0.490505		-1.24924	0.130314	-0.215013	-0.0193555	-0.4886	-0.354235	1.03917		7.27482	1.27932	2.11103	7.59696	0.987142	0.985762	0.47312		0.567433	0.0729271	0.000999001	0.003996	0.000999001	0.000999001		-0.342264	1.31305	0.172775	1.01991	-0.449502	0.352386	0.850714	3.46139
4.72803	-0.50777	0.289802	0.377723	1.80613	1.05895	-0.0359054	-0.171069		1.86174	0.0849043	0.573576	0.809245	1.5422	-0.0681925	0.525463		-1.30149	0.15212	-0.175025	-0.0431002	-0.530019	-0.287374	0.980824		7.01185	1.04241	2.1903	7.64878	1.10932	0.798862	0.415615		0.354645	0.176823	0.000999001	0.002997	0.000999001	0.000999001		-0.442742	1.17426	0.209441	1.02848	-0.446295	0.362329	0.819064	3.36882
4.79079	-0.356755	0.0229933	0.489657	1.68398	1.08699	-0.0887828	-0.109773		1.74974	-0.0356202	0.498204	0.774084	1.50249	0.0221336	0.517949		-1.37624	0.130903	-0.110161	-0.152929	-0.566394	-0.254711	0.948303		6.79324	0.924973	2.21544	7.7492	1.17563	0.722109	0.277741		0.356643	0.173826	0.000999001	0.00599401	0.001998	0.000999001		-0.444668	1.16121	0.201	0.99892	-0.443043	0.338203	0.73918	3.33694
4.85356	-0.131662	-0.091411	0.614456	1.66945	1.08338	-0.0750841	0.0728077		1.63478	-0.177694	0.411123	0.784405	1.48758	0.0235363	0.490876		-1.42745	0.0762504	-0.0719762	-0.295469	-0.581753	-0.282122	0.970394		6.73465	0.844698	2.18971	7.83323	1.15666	0.808759	0.140883		0.548452	0.0859141	0.000999001	0.010989	0.000999001	0.000999001		-0.371135	1.23468	0.168442	0.970654	-0.480415	0.324752	0.68037	3.30857
4.91632	-0.0488558	0.0414589	0.714994	1.72284	1.04471	-0.0182586	0.264808		1.5604	-0.228838	0.331895	0.807766	1.49247	-0.0384921	0.477503		-1.46358	0.0249756	-0.0915983	-0.390929	-0.574679	-0.34654	1.02193		6.78069	0.727709	2.16832	7.8468	1.09266	0.968374	0.0864411		0.844156	0.022977	0.001998	0.018981	0.000999001	0.000999001		-0.25638	1.31123	0.143022	0.956106	-0.527287	0.29488	0.700626	3.31098
4.97908	-0.105815	0.352905	0.79782	1.76805	1.008	0.0746193	0.365137		1.48478	-0.16382	0.295763	0.80264	1.49135	-0.071525	0.486867		-1.54334	0.00471192	-0.160561	-0.414486	-0.566693	-0.398724	1.05799		6.78752	0.62941	2.18974	7.78874	1.05507	1.04534	0.14426		0.873127	0.010989	0.001998	0.024975	0.000999001	0.000999001		-0.153293	1.47691	0.13226	0.955289	-0.535697	0.279332	0.666206	3.374
5.04184	-0.0934621	0.640943	0.885887	1.76007	1.01026	0.183288	0.352944		1.34507	-0.0657995	0.321448	0.767136	1.46119	-0.0192923	0.498092		-1.6863	0.0066918	-0.243486	-0.417647	-0.582918	-0.415034	1.06173		6.68858	0.677023	2.23544	7.69089	1.07561	0.960109	0.275314		0.79021	0.003996	0.000999001	0.024975	0.000999001	0.000999001		-0.118958	1.55964	0.130746	0.971734	-0.557633	0.265687	0.679015	3.37981
5.1046	0.161382	0.708629	0.953489	1.71325	1.05254	0.256727	0.278692		1.14196	-0.0455956	0.383743	0.741973	1.40415	0.0750971	0.486982		-1.82422	-0.00129192	-0.302909	-0.465508	-0.623887	-0.419022	1.05455		6.54967	0.913148	2.26159	7.56778	1.12063	0.778909	0.397199		0.798202	0.000999001	0.000999001	0.024975	0.000999001	0.000999001		-0.114549	1.57295	0.131038	0.984289	-0.564328	0.234714	0.773126	3.39883
5.16736	0.595063	0.507497	0.909442	1.6632	1.10263	0.255746	0.203833		0.94532	-0.134296	0.426689	0.760406	1.34525	0.116628	0.45433		-1.87336	-0.0359018	-0.316935	-0.558503	-0.663308	-0.44716	1.06258		6.46358	1.22853	2.2569	7.40786	1.13704	0.64514	0.437438		0.848152	0.001998	0.000999001	0.020979	0.000999001	0.000999001		-0.130428	1.45645	0.114805	0.959086	-0.590611	0.181662	0.789849	3.36046
5.23013	0.965239	0.166183	0.67356	1.61552	1.12993	0.208363	0.156045		0.815456	-0.25271	0.412586	0.804005	1.30771	0.0647422	0.426421		-1.84697	-0.0773858	-0.286251	-0.624926	-0.678343	-0.498754	1.08134		6.42776	1.4597	2.25369	7.22183	1.11515	0.642029	0.38111		0.956044	0.00699301	0.000999001	0.017982	0.000999001	0.000999001		-0.196934	1.38406	0.0887551	0.915873	-0.615214	0.154917	0.767594	3.28423
5.29289	1.0948	-0.119481	0.278421	1.54857	1.1359	0.192085	0.132542		0.73377	-0.287678	0.358757	0.819484	1.29177	-0.0197894	0.429811		-1.85907	-0.0900498	-0.233908	-0.59332	-0.677532	-0.530489	1.07972		6.35794	1.53861	2.28343	7.07846	1.09622	0.7219	0.278227		0.898102	0.011988	0.000999001	0.014985	0.000999001	0.000999001		-0.256118	1.2598	0.0773128	0.870272	-0.624424	0.134761	0.73079	3.22471
5.35565	1.03467	-0.235977	-0.123346	1.46363	1.152	0.242556	0.126332		0.627828	-0.200021	0.320058	0.779748	1.27848	-0.0406462	0.468213		-1.99531	-0.0600268	-0.195765	-0.467722	-0.690109	-0.505148	1.03755		6.21435	1.53427	2.33855	7.06028	1.11769	0.766027	0.202059		0.761239	0.020979	0.000999001	0.014985	0.000999001	0.000999001		-0.341108	1.20443	0.0692369	0.870788	-0.620699	0.151076	0.680048	3.22781
5.41841	0.985686	-0.213276	-0.378035	1.40627	1.20961	0.295772	0.136138		0.467794	-0.0581596	0.33063	0.717591	1.25277	0.027704	0.523198		-2.1972	-0.00829816	-0.199222	-0.327374	-0.726512	-0.439638	0.972603		6.07532	1.55761	2.39155	7.16946	1.16177	0.706418	0.189557		0.701299	0.024975	0.000999001	0.011988	0.000999001	0.000999001		-0.355629	1.20492	0.0963465	0.900824	-0.592298	0.164646	0.662316	3.27141
5.48117	1.08467	-0.160249	-0.464513	1.41392	1.31032	0.252542	0.155262		0.325265	0.0323445	0.364936	0.690107	1.21979	0.110614	0.573057		-2.30737	0.0319247	-0.241432	-0.254089	-0.759012	-0.395035	0.92581		6.05851	1.64721	2.44485	7.29279	1.16957	0.585411	0.21448		0.661339	0.024975	0.000999001	0.012987	0.000999001	0.000999001		-0.307592	1.19592	0.12832	0.926821	-0.573895	0.176611	0.655991	3.34866
5.54393	1.28297	-0.152278	-0.497393	1.44583	1.42012	0.109855	0.166015		0.320672	0.0284869	0.361525	0.712919	1.19794	0.113011	0.607358		-2.23818	0.0433001	-0.288697	-0.263557	-0.751492	-0.415696	0.920616		6.17984	1.75212	2.541	7.28707	1.1072	0.502869	0.218246		0.631369	0.023976	0.000999001	0.013986	0.000999001	0.000999001		-0.268362	1.17526	0.108964	0.953782	-0.58504	0.16329	0.652686	3.38834
5.60669	1.41667	-0.177121	-0.585955	1.39465	1.48917	0.0032474	0.155034		0.505294	-0.0204204	0.287309	0.740155	1.19831	0.0202281	0.624502		-2.07313	0.0264312	-0.304863	-0.305382	-0.706687	-0.482792	0.940776		6.32113	1.80402	2.70904	7.11366	1.00886	0.517888	0.170641		0.601399	0.018981	0.000999001	0.014985	0.000999001	0.000999001		-0.270334	1.19024	0.10087	0.935273	-0.599829	0.137802	0.607815	3.32862
5.66946	1.36249	-0.171869	-0.696916	1.19389	1.48141	0.0851342	0.130824		0.797825	-0.0337428	0.175888	0.714224	1.21423	-0.0893227	0.621043		-1.97823	-0.0182591	-0.285873	-0.321101	-0.671255	-0.532941	0.948951		6.35185	1.78052	2.90497	6.88374	0.945562	0.606998	0.102365		0.584416	0.020979	0.000999001	0.012987	0.000999001	0.000999001		-0.351448	1.1496	0.111902	0.903726	-0.614398	0.120358	0.577161	3.21587
5.73222	1.11903	-0.0959362	-0.677302	0.913036	1.39517	0.352578	0.116779		1.04244	0.0213937	0.0997962	0.628921	1.23081	-0.129244	0.58936		-2.01918	-0.0965035	-0.264823	-0.295305	-0.684181	-0.521216	0.923599		6.26854	1.69927	3.02091	6.76026	0.950605	0.706623	0.0767742		0.656344	0.00899101	0.000999001	0.011988	0.000999001	0.000999001		-0.356392	1.15364	0.0645008	0.882345	-0.6473	0.0966798	0.611362	3.16042
5.79498	0.771341	0.0325795	-0.424692	0.722523	1.26395	0.616744	0.123667		1.1323	0.113996	0.105501	0.534237	1.24154	-0.0909571	0.52748		-2.09228	-0.200948	-0.278219	-0.254458	-0.72415	-0.460404	0.874887		6.19536	1.57921	2.96477	6.8117	0.98199	0.776824	0.127208		0.785215	0.00699301	0.000999001	0.012987	0.000999001	0.000999001		-0.299828	1.13071	0.0663402	0.87096	-0.654089	0.0812285	0.635996	3.19342
5.85774	0.419182	0.158114	-0.0244411	0.744419	1.13677	0.667843	0.135504		1.08019	0.198441	0.176823	0.479006	1.25287	-0.0380919	0.448764		-2.04692	-0.293833	-0.325995	-0.228321	-0.721294	-0.39776	0.828185		6.24964	1.43367	2.73409	6.96292	0.963306	0.816162	0.220909		0.905095	0.002997	0.000999001	0.012987	0.000999001	0.000999001		-0.251558	1.16007	0.0950263	0.858652	-0.658793	0.0839507	0.680365	3.26235
5.9205	0.143239	0.233152	0.303184	0.935845	1.04859	0.475366	0.130605		0.978218	0.260415	0.259062	0.45884	1.27349	-0.0242028	0.378493		-1.85677	-0.325169	-0.368278	-0.220586	-0.628957	-0.361333	0.800538		6.42535	1.29712	2.41376	7.08336	0.860927	0.829039	0.28555		0.933067	0.001998	0.000999001	0.013986	0.000999001	0.000999001		-0.24461	1.13572	0.0744753	0.861992	-0.649551	0.0963855	0.683566	3.28229
5.98326	0.000131354	0.246975	0.402981	1.12737	1.00015	0.214523	0.115895		0.901276	0.307431	0.31211	0.429025	1.30289	-0.0334508	0.338775		-1.64422	-0.278449	-0.364667	-0.212853	-0.478856	-0.338681	0.797746		6.61407	1.2285	2.10812	7.11059	0.718198	0.802787	0.273966		0.868132	0.00599401	0.000999001	0.016983	0.000999001	0.000999001		-0.274527	1.12199	0.0742186	0.84843	-0.58375	0.129049	0.622014	3.2864
6.04603	0.00588101	0.223731	0.325986	1.17662	0.96358	0.0893288	0.130161		0.85509	0.328979	0.336405	0.365534	1.33234	-0.0117445	0.335475		-1.53811	-0.194963	-0.315174	-0.186742	-0.355397	-0.308098	0.827777		6.71953	1.26337	1.87966	7.08291	0.61433	0.72731	0.20628		0.799201	0.024975	0.000999001	0.018981	0.000999001	0.000999001		-0.296556	1.09986	0.0622284	0.843147	-0.544303	0.184918	0.559158	3.2305
6.10879	0.11682	0.199864	0.262019	1.07857	0.911708	0.136892	0.202588		0.80791	0.291009	0.352867	0.301543	1.35499	0.0526487	0.357877		-1.53799	-0.14212	-0.258897	-0.138175	-0.313726	-0.278342	0.902539		6.72772	1.36471	1.74294	7.06611	0.593349	0.624938	0.15046		0.809191	0.045954	0.000999001	0.021978	0.000999001	0.000999001		-0.270279	1.1561	0.0659649	0.869437	-0.525069	0.264461	0.514833	3.09721
6.17155	0.252232	0.197452	0.334534	0.931386	0.845926	0.211428	0.306347		0.752387	0.182062	0.369486	0.295649	1.37189	0.098401	0.388655		-1.54017	-0.15146	-0.232709	-0.0769653	-0.330911	-0.283557	1.01644		6.67087	1.44055	1.69196	7.07308	0.634008	0.541185	0.159673		0.846154	0.0529471	0.000999001	0.027972	0.001998	0.000999001		-0.194852	1.1445	0.0617168	0.895587	-0.520555	0.313317	0.52902	3.02268
6.23431	0.3569	0.209947	0.476164	0.819043	0.795148	0.149219	0.362231		0.720776	0.0538824	0.375076	0.366641	1.38727	0.0517467	0.413396		-1.48032	-0.190401	-0.236622	-0.0207425	-0.343271	-0.336489	1.12689		6.56011	1.42386	1.71005	7.06558	0.683262	0.500793	0.222916		0.87013	0.043956	0.000999001	0.021978	0.001998	0.000999001		-0.154137	1.04942	0.065323	0.893486	-0.551471	0.33614	0.487857	3.00954
6.29707	0.436503	0.213525	0.515723	0.750496	0.784565	-0.0705101	0.301292		0.739505	-0.00579461	0.361684	0.467673	1.40072	-0.0865701	0.423058		-1.40951	-0.199657	-0.243656	0.0123354	-0.324432	-0.398064	1.17056		6.38539	1.33202	1.7532	7.01941	0.710911	0.485801	0.271837		0.74026	0.0629371	0.001998	0.018981	0.000999001	0.000999001		-0.21636	0.996879	0.0508695	0.880647	-0.561092	0.325947	0.5035	3.03548
6.35983	0.518392	0.19985	0.378284	0.705467	0.805517	-0.329213	0.132608		0.781076	0.0468486	0.341959	0.528591	1.40632	-0.226076	0.412235		-1.41034	-0.157568	-0.23926	0.0155985	-0.312031	-0.407727	1.11288		6.17472	1.23925	1.74799	6.96209	0.729466	0.469549	0.237499		0.470529	0.138861	0.002997	0.015984	0.001998	0.000999001		-0.348555	0.952487	0.029836	0.855109	-0.538407	0.283945	0.518583	3.04786
6.42259	0.585968	0.19931	0.178547	0.699121	0.820717	-0.505955	-0.0508587		0.773492	0.163804	0.337335	0.521145	1.39898	-0.264067	0.379312		-1.46394	-0.102573	-0.239933	0.00600975	-0.352076	-0.348844	0.984866		6.01578	1.19269	1.63403	6.93662	0.767492	0.465934	0.110225		0.285714	0.314685	0.003996	0.013986	0.001998	0.000999001		-0.480687	0.861852	0.035988	0.842069	-0.526	0.284089	0.472564	2.97892
6.48536	0.581355	0.260772	0.105229	0.764452	0.803529	-0.582436	-0.140979		0.663475	0.248069	0.35165	0.480058	1.37926	-0.177006	0.329226		-1.44436	-0.091144	-0.265752	0.019221	-0.428647	-0.276929	0.864984		5.99105	1.16687	1.4198	6.94236	0.832595	0.523721	-0.0452165		0.236763	0.396603	0.003996	0.014985	0.001998	0.000999001		-0.540524	0.782312	0.0315406	0.855477	-0.527772	0.275103	0.391491	2.95335
6.54812	0.491566	0.395685	0.221095	0.874253	0.770637	-0.614897	-0.0997392		0.473004	0.247742	0.363665	0.463097	1.35148	-0.0343255	0.273711		-1.26161	-0.139231	-0.299313	0.0801407	-0.466636	-0.272391	0.816995		6.09637	1.10606	1.18904	6.93253	0.902621	0.659416	-0.131573		0.305694	0.290709	0.003996	0.016983	0.003996	0.000999001		-0.483002	0.831886	0.0361182	0.859166	-0.552088	0.279536	0.358051	2.95888
6.61088	0.41546	0.544992	0.392487	0.92184	0.76921	-0.63794	0.014635		0.29639	0.202935	0.348656	0.49573	1.31968	0.0724405	0.225615		-0.986444	-0.210719	-0.285558	0.172326	-0.410863	-0.360807	0.841801		6.24521	1.00242	1.03999	6.87489	0.94723	0.807914	-0.08793		0.472527	0.161838	0.003996	0.022977	0.001998	0.000999001		-0.422753	0.884068	0.0443186	0.829764	-0.57546	0.275106	0.397824	3.00084
6.67364	0.507439	0.620254	0.420808	0.817709	0.826288	-0.630981	0.103248		0.241739	0.197196	0.304035	0.554415	1.287	0.106794	0.191218		-0.799638	-0.260634	-0.183281	0.243123	-0.293403	-0.483203	0.889492		6.35728	0.917479	1.01204	6.80142	0.952554	0.866424	0.0649119		0.589411	0.106893	0.002997	0.020979	0.000999001	0.000999001		-0.439952	1.00917	0.0358076	0.814388	-0.588431	0.262786	0.414731	3.05809
6.7364	0.831143	0.592805	0.234839	0.606311	0.912295	-0.577884	0.112576		0.365141	0.268885	0.249726	0.596174	1.25694	0.0963527	0.168201		-0.811296	-0.280109	-0.0167693	0.250425	-0.209999	-0.54997	0.916086		6.42424	0.921595	1.07	6.7832	0.927467	0.801917	0.237013		0.581419	0.112887	0.003996	0.018981	0.000999001	0.000999001		-0.509569	1.01617	0.034814	0.810394	-0.582308	0.253017	0.47246	3.07436
6.79916	1.27615	0.535862	-0.0521743	0.45604	0.961496	-0.52294	0.0743487		0.641634	0.377789	0.204823	0.597259	1.23063	0.0800634	0.151813		-0.95117	-0.293947	0.132283	0.207852	-0.227664	-0.524895	0.924232		6.47494	1.01878	1.15358	6.85537	0.894685	0.703093	0.332587		0.506494	0.170829	0.004995	0.011988	0.000999001	0.000999001		-0.531447	0.896801	0.0254948	0.807005	-0.539815	0.279558	0.567956	3.04603
6.86192	1.64066	0.556604	-0.263234	0.506097	0.934227	-0.534107	0.0672872		0.981743	0.455625	0.169429	0.565247	1.20139	0.0625758	0.142798		-1.05356	-0.321479	0.192246	0.176694	-0.323052	-0.453886	0.947446		6.49505	1.13785	1.23143	6.9757	0.880654	0.700785	0.31783		0.474525	0.203796	0.004995	0.00699301	0.000999001	0.000999001		-0.468211	0.818614	0.0222389	0.802326	-0.537896	0.306223	0.614469	3.03601
6.92469	1.80713	0.674443	-0.313898	0.723572	0.858748	-0.613005	0.139894		1.27518	0.476186	0.132252	0.523999	1.15652	0.024629	0.14789		-1.03856	-0.352916	0.163118	0.204901	-0.415938	-0.411395	1.00034		6.42048	1.19505	1.30333	7.06173	0.907726	0.824962	0.241265		0.591409	0.172827	0.004995	0.00899101	0.000999001	0.000999001		-0.448172	0.831073	-0.00698776	0.786115	-0.565164	0.326302	0.591196	3.00407
6.98745	1.83442	0.779485	-0.245433	0.929533	0.807509	-0.672832	0.26573		1.43871	0.468008	0.0921751	0.494916	1.09102	-0.032952	0.171151		-0.984524	-0.36786	0.109648	0.273877	-0.455588	-0.423845	1.05315		6.22924	1.16029	1.36233	7.06291	0.982719	0.953046	0.190555		0.799201	0.111888	0.004995	0.010989	0.000999001	0.000999001		-0.381799	0.959794	-0.0213014	0.775282	-0.576693	0.319022	0.547362	2.99141
7.05021	1.87991	0.736315	-0.129869	0.974883	0.829344	-0.630455	0.369053		1.44988	0.467343	0.0657021	0.489928	1.02093	-0.0715241	0.204801		-1.01726	-0.365428	0.0935256	0.312366	-0.462423	-0.450795	1.05914		6.01786	1.06765	1.37621	6.99108	1.08467	0.922036	0.221214		0.991009	0.0669331	0.00799201	0.010989	0.000999001	0.000999001		-0.312125	1.06232	-0.0182398	0.768846	-0.596549	0.292967	0.522425	3.01587
7.11297	2.04451	0.538055	0.0190913	0.882268	0.905729	-0.514188	0.393251		1.3513	0.477001	0.0706326	0.511803	0.977385	-0.0480504	0.23035		-1.15336	-0.361015	0.11496	0.267636	-0.484478	-0.439304	1.00358		5.94664	0.97825	1.31881	6.88717	1.16809	0.700915	0.315923		0.958042	0.0509491	0.004995	0.011988	0.000999001	0.000999001		-0.273448	1.08109	-0.00070669	0.758538	-0.580614	0.269757	0.506782	3.02851
7.17573	2.30034	0.34074	0.225286	0.807386	0.974856	-0.453753	0.347831		1.21993	0.478202	0.10593	0.553153	0.98033	0.0371823	0.231334		-1.28094	-0.35239	0.12234	0.160768	-0.527954	-0.387292	0.920456		6.09062	0.944287	1.21289	6.77362	1.19127	0.441514	0.405687		0.961039	0.047952	0.002997	0.013986	0.000999001	0.000999001		-0.298831	1.07623	0.0155444	0.782198	-0.576515	0.266991	0.487389	3.00314
7.23849	2.55071	0.32064	0.46466	0.87025	0.996478	-0.546482	0.29308		1.11814	0.468724	0.152278	0.596434	1.01619	0.132445	0.206689		-1.29413	-0.305538	0.0760899	0.0672284	-0.547319	-0.344642	0.860705		6.35978	0.997354	1.12484	6.64733	1.15163	0.342623	0.42952		0.88012	0.04995	0.002997	0.014985	0.000999001	0.000999001		-0.288237	1.06779	0.0330088	0.804805	-0.565553	0.286314	0.480474	2.90842
7.30126	2.7276	0.490842	0.643653	1.04106	0.988743	-0.740808	0.280503		1.06203	0.468593	0.192617	0.621986	1.04616	0.176467	0.171784		-1.21871	-0.19225	-0.00248767	0.0433367	-0.505541	-0.352894	0.848765		6.58737	1.14039	1.10599	6.50869	1.09314	0.458405	0.378445		0.905095	0.043956	0.002997	0.017982	0.000999001	0.000999001		-0.256252	1.08279	0.0409052	0.806588	-0.56477	0.306811	0.437247	2.90636
7.36402	2.81957	0.673759	0.687519	1.19059	1.00002	-0.87099	0.306137		1.03119	0.484	0.227902	0.620979	1.04131	0.148521	0.145497		-1.18317	-0.0430374	-0.0477514	0.0766496	-0.430066	-0.394466	0.872224		6.69519	1.32704	1.14186	6.37877	1.07051	0.647213	0.290089		0.955045	0.045954	0.004995	0.020979	0.000999001	0.000999001		-0.240571	1.15201	0.0184848	0.784161	-0.529956	0.304495	0.430585	2.87047
7.42678	2.83355	0.671048	0.638679	1.22775	1.0491	-0.816564	0.318499		1.00552	0.483386	0.269106	0.60059	1.00954	0.0798471	0.135646		-1.27364	0.054295	-0.0126315	0.110007	-0.394696	-0.411781	0.907937		6.75173	1.45609	1.16876	6.27911	1.09806	0.714964	0.208988		0.836164	0.047952	0.00599401	0.023976	0.000999001	0.000999001		-0.232831	1.16372	-0.00327974	0.779586	-0.510227	0.335202	0.472885	2.91242
7.48954	2.77229	0.460555	0.635658	1.16538	1.09987	-0.623159	0.270257		0.987417	0.429725	0.314636	0.575688	0.984353	0.0214948	0.13684		-1.44164	0.0272478	0.0865177	0.107634	-0.444347	-0.376577	0.947976		6.86205	1.42135	1.1441	6.20405	1.13173	0.605693	0.15477		0.817183	0.0559441	0.00899101	0.024975	0.000999001	0.000999001		-0.196441	1.17054	-0.0388959	0.779261	-0.528122	0.339183	0.436388	2.87559
7.5523	2.66069	0.21544	0.773784	1.06102	1.09801	-0.459916	0.163418		0.985448	0.337148	0.339925	0.557039	0.986459	0.00381855	0.141614		-1.56342	-0.106337	0.185208	0.0888367	-0.546247	-0.329681	0.995817		7.02562	1.20135	1.09579	6.12731	1.10524	0.445118	0.122366		0.908092	0.0729271	0.014985	0.02997	0.000999001	0.000999001		-0.250367	1.07766	-0.0517948	0.794139	-0.557257	0.35276	0.35929	2.84235
7.61506	2.56228	0.128947	0.99182	0.932171	1.03017	-0.459059	0.0472958		0.982728	0.275787	0.313218	0.549011	1.00088	0.0222591	0.151277		-1.57188	-0.245792	0.227382	0.0964704	-0.621428	-0.340948	1.04419		7.13454	0.906973	1.09659	6.03907	0.988982	0.399656	0.100972		0.911089	0.0999001	0.00999001	0.030969	0.000999001	0.000999001		-0.303801	0.974053	-0.0437196	0.821579	-0.585616	0.326708	0.29973	2.77913
7.67782	2.52962	0.234823	1.11482	0.76028	0.944118	-0.599965	-0.0252122		0.93572	0.301493	0.223893	0.555319	0.996364	0.0522546	0.173372		-1.50848	-0.299987	0.208927	0.142625	-0.621342	-0.42839	1.06865		7.11289	0.718084	1.18943	5.96586	0.816707	0.504145	0.0847434		0.729271	0.127872	0.00799201	0.026973	0.000999001	0.000999001		-0.359634	0.892993	-0.0366219	0.848009	-0.610767	0.315259	0.196671	2.7772
7.74059	2.5328	0.409324	1.01971	0.568439	0.910158	-0.74476	-0.0402137		0.816009	0.381878	0.0970228	0.579488	0.965287	0.0714075	0.208581		-1.44987	-0.272085	0.17364	0.196125	-0.568187	-0.526278	1.04866		7.02346	0.742279	1.34163	5.94192	0.655249	0.635111	0.0684744		0.614386	0.146853	0.003996	0.022977	0.000999001	0.000999001		-0.402303	0.840782	-0.016749	0.844849	-0.634596	0.287755	0.154084	2.82501
7.80335	2.46608	0.532943	0.755752	0.454185	0.963793	-0.775784	-0.0268597		0.65318	0.410264	-0.0183863	0.615093	0.936393	0.0705462	0.243792		-1.41236	-0.246837	0.173623	0.223314	-0.522496	-0.544371	0.99096		7.00325	0.919405	1.47399	5.96135	0.547602	0.645508	0.0446511		0.575425	0.162837	0.003996	0.025974	0.000999001	0.000999001		-0.365531	0.846207	-0.0178705	0.846433	-0.626318	0.267599	0.165902	2.81222
7.86611	2.25092	0.615913	0.497579	0.511998	1.08208	-0.695374	-0.0242878		0.525501	0.30876	-0.077065	0.639346	0.942293	0.0534068	0.262717		-1.35012	-0.294093	0.231502	0.230583	-0.520923	-0.461669	0.925325		7.09681	1.06847	1.5328	5.96928	0.48385	0.510244	0.0132988		0.674326	0.146853	0.003996	0.027972	0.002997	0.000999001		-0.299714	0.848475	-0.0302704	0.821397	-0.602279	0.29247	0.186988	2.79759
7.92887	1.92636	0.747534	0.383186	0.723112	1.20669	-0.604628	-0.0455979		0.496512	0.11732	-0.0608548	0.625361	0.977549	0.0330896	0.264885		-1.23739	-0.393839	0.32996	0.257684	-0.55129	-0.355066	0.876139		7.18789	1.04218	1.53301	5.9104	0.42491	0.334288	-0.00863136		0.848152	0.112887	0.00699301	0.047952	0.002997	0.000999001		-0.261927	0.881337	-0.0485598	0.775039	-0.562728	0.332915	0.160373	2.68489
7.99163	1.6149	0.94451	0.403417	0.943976	1.283	-0.601161	-0.0704143		0.556284	-0.0303593	0.0146605	0.56694	0.998235	0.027415	0.270997		-1.12194	-0.463606	0.427201	0.331194	-0.581495	-0.326695	0.842994		7.12109	0.848043	1.53622	5.7875	0.351472	0.231241	0.0009862		0.991009	0.0789211	0.004995	0.0789211	0.002997	0.000999001		-0.253312	1.00092	-0.0421977	0.776784	-0.568132	0.33388	0.0950265	2.63321
8.05439	1.396	1.09325	0.442519	1.01987	1.28222	-0.696795	-0.0676254		0.626841	-0.0275786	0.110141	0.49028	0.968961	0.049637	0.304566		-1.08026	-0.454287	0.482383	0.43399	-0.599209	-0.400406	0.811868		6.88109	0.625945	1.59289	5.66731	0.287383	0.212874	0.0412971		0.987013	0.0639361	0.004995	0.10989	0.004995	0.000999001		-0.301494	1.05801	-0.029355	0.798945	-0.558912	0.302716	0.0258932	2.56847
8.11715	1.23793	1.06495	0.40557	0.910248	1.20421	-0.814802	-0.0242676		0.627421	0.107141	0.182259	0.436821	0.907249	0.0965115	0.366081		-1.1313	-0.404572	0.476825	0.525228	-0.617178	-0.494381	0.780992		6.62187	0.512464	1.70492	5.62433	0.274249	0.201682	0.0769168		0.8002	0.0709291	0.000999001	0.0979021	0.012987	0.000999001		-0.356764	1.03774	0.00735881	0.839794	-0.581907	0.262201	-0.00681795	2.54195
8.17992	1.07378	0.869874	0.290564	0.701695	1.07773	-0.8503	0.0434186		0.535428	0.250099	0.20448	0.432224	0.873299	0.144768	0.427326		-1.21515	-0.393492	0.422578	0.584273	-0.64719	-0.501333	0.76864		6.50683	0.528999	1.83411	5.67655	0.323182	0.135151	0.0662592		0.594406	0.105894	0.000999001	0.0739261	0.015984	0.000999001		-0.438668	0.990722	0.0305842	0.88623	-0.610434	0.268502	0.00380312	2.58111
8.24268	0.92569	0.662662	0.146312	0.510281	0.960992	-0.742178	0.101732		0.388204	0.284295	0.178685	0.472009	0.911554	0.164816	0.454579		-1.25907	-0.448041	0.353821	0.625461	-0.680907	-0.396616	0.794214		6.53755	0.595695	1.93546	5.7733	0.392572	0.0372287	0.00799028		0.452547	0.162837	0.001998	0.0629371	0.018981	0.000999001		-0.429675	0.914365	0.057115	0.904918	-0.564714	0.290792	0.0211078	2.62659
8.30544	0.908627	0.583254	-0.00726507	0.387226	0.924794	-0.516146	0.122179		0.236405	0.189761	0.129557	0.534726	1.00506	0.145306	0.438475		-1.24635	-0.51339	0.303845	0.66866	-0.699613	-0.264278	0.857414		6.5619	0.637701	1.98232	5.84219	0.416665	-0.0159674	-0.0455516		0.480519	0.203796	0.004995	0.0639361	0.022977	0.000999001		-0.403385	0.866064	0.0390121	0.888783	-0.535995	0.325464	0.0269037	2.64225
8.3682	1.08772	0.614806	-0.189974	0.315859	1.0105	-0.277981	0.0997475		0.106347	0.0354572	0.0842021	0.602161	1.09185	0.108627	0.399831		-1.20731	-0.519008	0.282124	0.705378	-0.695399	-0.21465	0.940488		6.44737	0.65888	1.97153	5.84803	0.362172	0.0153737	-0.0315758		0.6004	0.196803	0.00699301	0.0719281	0.017982	0.000999001		-0.334227	0.867146	0.0318676	0.86157	-0.502588	0.371988	0.0241278	2.63091
8.43096	1.35701	0.625867	-0.396401	0.271495	1.19103	-0.151489	0.0567454		0.00620488	-0.0965036	0.0529333	0.662131	1.1258	0.1007	0.366068		-1.1563	-0.462058	0.270249	0.704863	-0.675263	-0.27799	1.02657		6.22207	0.704788	1.91923	5.81339	0.262566	0.0969036	0.0614589		0.688312	0.175824	0.010989	0.0689311	0.00799201	0.000999001		-0.315254	0.89879	0.00296972	0.836716	-0.506516	0.378322	0.0535928	2.61406
8.49372	1.50656	0.548687	-0.548912	0.255288	1.37825	-0.186549	0.0288631		-0.048081	-0.167384	0.0284789	0.697428	1.11669	0.157849	0.345023		-1.06729	-0.409955	0.241688	0.654238	-0.646378	-0.381687	1.10631		6.03376	0.766363	1.85528	5.79071	0.196623	0.168612	0.179106		0.681319	0.192807	0.00599401	0.0599401	0.00699301	0.000999001		-0.346621	0.92509	0.00951386	0.807302	-0.531299	0.371773	0.0971941	2.62195
8.55649	1.428	0.479729	-0.54271	0.270074	1.4843	-0.303733	0.038714		-0.0331277	-0.177597	0.0037766	0.686801	1.10887	0.27366	0.325014		-0.92448	-0.419307	0.188047	0.58316	-0.606019	-0.430656	1.16417		5.9899	0.745871	1.81266	5.81546	0.224874	0.213901	0.254133		0.648352	0.191808	0.002997	0.0559441	0.00599401	0.000999001		-0.365902	0.950839	0.0308684	0.80051	-0.551726	0.361083	0.144335	2.67324
8.61925	1.22885	0.571727	-0.344636	0.291305	1.48784	-0.340825	0.07351		0.0498696	-0.136961	-0.0117583	0.628018	1.12644	0.392794	0.298476		-0.778196	-0.467005	0.127131	0.540116	-0.550262	-0.40476	1.1693		6.06698	0.540756	1.80874	5.87709	0.335602	0.266895	0.275276		0.69031	0.14985	0.002997	0.0539461	0.00799201	0.000999001		-0.376272	0.991109	0.0494522	0.804126	-0.548724	0.344012	0.173572	2.74316
8.68201	1.11206	0.830837	-0.0391417	0.285547	1.4423	-0.188535	0.0881598		0.155171	-0.0588065	0.00218619	0.556691	1.14774	0.441867	0.277584		-0.718789	-0.475568	0.0858863	0.545161	-0.487232	-0.373043	1.09622		6.1756	0.168923	1.83085	5.92545	0.448194	0.354712	0.298052		0.85015	0.0819181	0.003996	0.0679321	0.00799201	0.000999001		-0.324303	1.10813	0.0750142	0.8092	-0.519219	0.346711	0.184711	2.77464
8.74477	1.1483	1.05699	0.229376	0.252293	1.41587	0.0962455	0.0400542		0.22105	0.0248059	0.0527672	0.527315	1.13495	0.379981	0.279478		-0.782413	-0.404943	0.0763254	0.573673	-0.433493	-0.413993	0.960488		6.27706	-0.198202	1.84372	5.90643	0.476284	0.447854	0.383419		0.948052	0.044955	0.001998	0.0849151	0.004995	0.000999001		-0.244091	1.19291	0.0779011	0.815612	-0.516193	0.32221	0.195382	2.82383
8.80753	1.2056	1.01951	0.357777	0.22477	1.42319	0.319142	-0.068032		0.224686	0.0681182	0.118144	0.563076	1.08116	0.232808	0.297307		-0.897485	-0.30481	0.0877454	0.591102	-0.395897	-0.528019	0.823814		6.39924	-0.34725	1.81823	5.80373	0.401388	0.478609	0.528439		0.903097	0.022977	0.001998	0.0709291	0.003996	0.000999001		-0.20447	1.14423	0.052173	0.833938	-0.574257	0.299598	0.224801	2.84768
8.87029	1.12752	0.698562	0.332014	0.221368	1.419	0.315997	-0.177039		0.202992	0.0492595	0.161796	0.624984	1.01953	0.0811378	0.295549		-0.9458	-0.265966	0.0993981	0.598975	-0.362976	-0.63275	0.748225		6.54471	-0.191276	1.75731	5.65763	0.293783	0.40681	0.663843		0.956044	0.036963	0.001998	0.043956	0.002997	0.000999001		-0.249634	1.00827	-0.00493559	0.785936	-0.617044	0.259975	0.261677	2.83777
8.93305	0.955201	0.336562	0.196252	0.214888	1.35963	0.110276	-0.211323		0.212161	-0.00202939	0.167747	0.641217	0.986134	0.00735719	0.243692		-0.880257	-0.324541	0.097197	0.637292	-0.318931	-0.643485	0.738333		6.63094	0.152994	1.6934	5.54248	0.257779	0.260692	0.722083		0.762238	0.0839161	0.002997	0.025974	0.002997	0.000999001		-0.356003	0.941061	-0.0602172	0.754937	-0.618577	0.23151	0.269617	2.84154
8.99582	0.920369	0.232055	0.00332307	0.171663	1.2641	-0.0999777	-0.140146		0.268328	-0.0297239	0.162173	0.574996	0.982234	0.0386757	0.155549		-0.768836	-0.425365	0.078731	0.736779	-0.26302	-0.55508	0.73502		6.56247	0.448478	1.65814	5.51478	0.343561	0.113057	0.703049		0.709291	0.161838	0.00799201	0.020979	0.002997	0.000999001		-0.415042	0.96271	-0.083572	0.714398	-0.581068	0.26571	0.259525	2.82675
9.05858	1.19174	0.472586	-0.195512	0.116392	1.20442	-0.127205	-0.00507047		0.335187	-0.0102904	0.196587	0.461678	0.979858	0.132606	0.0872263		-0.713648	-0.481914	0.0482202	0.872345	-0.208469	-0.444982	0.675359		6.35859	0.511397	1.65218	5.57308	0.501167	0.0241994	0.667601		0.858142	0.142857	0.016983	0.027972	0.002997	0.000999001		-0.409411	1.01378	-0.0974214	0.668957	-0.54474	0.300705	0.2496	2.82672
9.12134	1.65156	0.863606	-0.337069	0.128609	1.22967	0.0243981	0.115532		0.371077	0.022861	0.304855	0.372469	0.961433	0.216955	0.087149		-0.736582	-0.462001	0.0131447	0.971379	-0.161337	-0.400016	0.560456		6.16938	0.334155	1.64256	5.66636	0.619736	0.00969371	0.668527		0.842158	0.0689311	0.015984	0.0559441	0.001998	0.000999001		-0.323998	1.13193	-0.0726769	0.682894	-0.542432	0.300616	0.268314	2.87203
9.1841	1.96747	1.11224	-0.36435	0.253183	1.30338	0.164032	0.173072		0.378848	0.0230771	0.472839	0.340731	0.94369	0.249141	0.145774		-0.762149	-0.405721	-0.0144315	0.973608	-0.107722	-0.442391	0.458791		6.13285	0.0701238	1.58956	5.7434	0.62072	0.0507921	0.696337		0.7003	0.031968	0.00799201	0.0769231	0.000999001	0.000999001		-0.242319	1.16336	-0.0429906	0.74702	-0.562031	0.290982	0.280684	2.8481
9.24686	1.90655	1.08082	-0.281653	0.425352	1.32581	0.104757	0.182176		0.398856	-0.0059865	0.647585	0.330811	0.956381	0.242367	0.199144		-0.715418	-0.366403	-0.0211179	0.884722	-0.0292669	-0.522192	0.438987		6.21972	-0.0901701	1.47922	5.79216	0.523423	0.115933	0.698268		0.735265	0.020979	0.003996	0.0839161	0.003996	0.000999001		-0.180521	1.16002	-0.0161203	0.773605	-0.596636	0.268037	0.266783	2.82566
9.30962	1.56729	0.878511	-0.18026	0.515078	1.22669	-0.151456	0.189956		0.453691	-0.00548443	0.775237	0.285068	1.00175	0.238494	0.187174		-0.619088	-0.352991	-0.00495125	0.771575	0.0696193	-0.572021	0.502006		6.24515	-0.0484149	1.33572	5.82707	0.424158	0.164107	0.645659		0.947053	0.035964	0.003996	0.0759241	0.00799201	0.000999001		-0.196372	1.06714	-0.00365614	0.785557	-0.623219	0.261923	0.218476	2.80012
9.37238	1.28693	0.733342	-0.179106	0.460291	1.03858	-0.42038	0.217641		0.511882	0.0714287	0.832243	0.197394	1.0448	0.259439	0.109811		-0.574696	-0.340636	0.0145454	0.705087	0.157663	-0.563319	0.583164		6.04892	0.151628	1.20578	5.84149	0.408515	0.14319	0.571508		0.878122	0.0999001	0.00699301	0.0569431	0.00899101	0.000999001		-0.266304	0.995124	-0.0236861	0.781785	-0.597614	0.299257	0.180659	2.76922
9.43515	1.32475	0.787477	-0.320364	0.339479	0.874963	-0.522746	0.240366		0.516422	0.194893	0.826457	0.128899	1.04861	0.288101	0.0252969		-0.647618	-0.325225	0.00618479	0.706261	0.204592	-0.515201	0.618092		5.65684	0.367827	1.12724	5.78822	0.477429	0.0148163	0.535921		0.8002	0.181818	0.014985	0.047952	0.00899101	0.000999001		-0.348509	0.972463	-0.0567637	0.765079	-0.588122	0.336408	0.1805	2.70676
9.49791	1.64624	0.997908	-0.5268	0.287601	0.830591	-0.45671	0.227335		0.446821	0.275251	0.777242	0.143764	1.01589	0.295581	-0.00535637		-0.786939	-0.342114	-0.0455169	0.742605	0.209771	-0.462033	0.599868		5.25495	0.454017	1.10221	5.62433	0.553314	-0.199341	0.56002		0.827173	0.192807	0.017982	0.04995	0.00799201	0.000999001		-0.375154	1.02746	-0.0744873	0.744846	-0.577015	0.337841	0.192143	2.60661
9.56067	2.00216	1.20028	-0.674207	0.340554	0.898132	-0.382063	0.193782		0.342516	0.250511	0.700754	0.233882	0.989433	0.280406	0.0302507		-0.87168	-0.41815	-0.121348	0.769723	0.197085	-0.422089	0.57071		5.01288	0.347842	1.09216	5.37872	0.556294	-0.401612	0.604006		0.892108	0.133866	0.010989	0.0789211	0.011988	0.000999001		-0.387098	1.11674	-0.0788043	0.727871	-0.575859	0.30633	0.176236	2.49513
9.62343	2.17896	1.25119	-0.708477	0.390638	0.979687	-0.443268	0.198152		0.260349	0.15056	0.612738	0.317845	1.01014	0.273225	0.0967686		-0.832284	-0.517593	-0.179487	0.771747	0.181747	-0.395106	0.568034		4.94891	0.108269	1.04125	5.16072	0.476241	-0.473401	0.613565		0.892108	0.108891	0.00599401	0.108891	0.017982	0.000999001		-0.41251	1.14815	-0.0662808	0.75213	-0.580419	0.292753	0.0940033	2.39407
9.68619	2.1488	1.12653	-0.685329	0.318622	0.979387	-0.622557	0.277737		0.216375	0.0667833	0.536032	0.321021	1.07754	0.300925	0.153029		-0.715124	-0.559851	-0.189913	0.762903	0.150249	-0.378559	0.590713		4.96486	-0.118588	0.917544	5.08046	0.375293	-0.370614	0.580949		0.779221	0.114885	0.003996	0.124875	0.023976	0.000999001		-0.435822	1.16782	-0.0510384	0.817523	-0.589448	0.2856	-0.0121551	2.35237
9.74895	2.00768	0.916824	-0.696406	0.158961	0.887441	-0.771491	0.390834		0.179672	0.0603321	0.494063	0.253819	1.15302	0.351771	0.183588		-0.626398	-0.502444	-0.157139	0.756445	0.0801212	-0.376603	0.617369		4.98044	-0.193003	0.744675	5.14937	0.325362	-0.172449	0.551757		0.651349	0.160839	0.003996	0.113886	0.027972	0.000999001		-0.467356	1.11212	-0.0219828	0.821286	-0.561028	0.312358	-0.0134093	2.36399
9.81172	1.83796	0.743698	-0.772091	0.0989358	0.779273	-0.774398	0.437441		0.122076	0.1097	0.491117	0.20385	1.19806	0.383451	0.190324		-0.624861	-0.396142	-0.109001	0.739482	-0.0227823	-0.392968	0.641909		4.99879	-0.0796049	0.595447	5.26348	0.344983	-0.0262398	0.571907		0.542458	0.202797	0.004995	0.0849151	0.021978	0.000999001		-0.470149	1.05147	-0.0139476	0.836788	-0.541504	0.300179	0.041905	2.41009
9.87448	1.67606	0.665776	-0.870911	0.290295	0.738037	-0.663269	0.351335		0.06004	0.151358	0.501036	0.247761	1.20467	0.367403	0.167649		-0.678182	-0.340092	-0.0664195	0.682886	-0.115784	-0.421368	0.675734		5.04149	0.124722	0.543677	5.29605	0.392682	-0.0278034	0.637097		0.498501	0.234765	0.004995	0.0589411	0.010989	0.000999001		-0.442796	1.02417	-0.00859945	0.826239	-0.53862	0.296615	0.0943134	2.5022
9.93724	1.58625	0.640843	-0.955363	0.669673	0.778976	-0.56883	0.175061		0.0354984	0.160837	0.48256	0.372988	1.18996	0.320435	0.102892		-0.713466	-0.377327	-0.0288256	0.577388	-0.153869	-0.446837	0.716961		5.06138	0.266845	0.60779	5.21391	0.413636	-0.143928	0.701684		0.514486	0.242757	0.004995	0.0539461	0.012987	0.000999001		-0.460517	0.938556	-0.0505053	0.814094	-0.555591	0.261113	0.0905326	2.5154
10	1.68777	0.573789	-1.04819	0.989203	0.844303	-0.575131	0.0362239		0.0593267	0.178348	0.413462	0.488455	1.16916	0.287492	0.00514231		-0.686988	-0.445993	0.0110716	0.458791	-0.130317	-0.45472	0.735516		4.9647	0.264399	0.734334	5.1041	0.387395	-0.248551	0.733304		0.531469	0.264735	0.00599401	0.0539461	0.013986	0.000999001		-0.535833	0.957061	-0.069384	0.77303	-0.572122	0.247299	0.0843369	2.45835

## Sheet: 2H
Tests (Exp. 2 - AI Photom group)
	NIC infusion								ACTIVE non-reinforced								INACTIVE								Permutation Tests				Bootstrap tests
Time	A2	A3	A4	B1	B3	B4	B6		A2	A3	A4	B1	B3	B4	B6		A2	A3	A4	B1	B3	B4	B6		REW-AC	REW-INAC	AC-INAC		REW		AC		INAC
-5	0.490377	-0.0693044	-0.0419284	0.221375	-0.176998	0.236653	-0.110256		0.703279	0.213607	0.100148	0.0939244	0.31988	0.16033	-0.119907		0.0812397	-0.00466288	-0.155863	-1.16173	0.0809133	0.00712953	0.0411526		0.350649	0.677323	0.167832		-0.358571	0.38734	-0.15145	0.477009	-0.485023	0.365531
-4.93724	0.613906	-0.13119	-0.0855017	-0.0220383	-0.0765236	0.223421	-0.0239416		0.578716	0.232542	0.144837	0.0746689	0.307471	0.126426	-0.129387		-0.021375	0.145166	-0.124392	-1.21455	-0.0155052	0.117849	0.0155615		0.310689	0.819181	0.182817		-0.356536	0.355253	-0.148155	0.450518	-0.457704	0.340861
-4.87448	0.736078	-0.214746	-0.068396	-0.0665064	-0.0033432	0.20221	0.0272575		0.460902	0.268213	0.0524169	-0.0392699	0.305185	0.154172	-0.134797		-0.0271195	0.186053	-0.0642672	-1.10497	-0.212478	0.286479	-0.0471289		0.37962	0.833167	0.257742		-0.374841	0.354323	-0.166673	0.415135	-0.424194	0.346365
-4.81172	0.770804	-0.31696	0.0292977	0.0957008	-0.063761	0.196463	-0.0194287		0.351179	0.309651	-0.0814483	-0.154354	0.316899	0.218114	-0.0959088		-0.0181964	0.140736	-0.0361677	-0.863251	-0.376818	0.362578	-0.109954		0.393606	0.777223	0.268731		-0.404876	0.378633	-0.164675	0.389986	-0.435023	0.32938
-4.74895	0.669182	-0.383658	0.127841	0.304507	-0.189032	0.213734	-0.145034		0.240702	0.327844	-0.137284	-0.169067	0.331338	0.269257	-0.0410693		-0.077045	0.0960541	-0.0784181	-0.639601	-0.377649	0.30602	-0.1526		0.312687	0.707293	0.178821		-0.387793	0.36996	-0.144055	0.377811	-0.484357	0.28914
-4.68619	0.439645	-0.364587	0.101451	0.383727	-0.232977	0.249131	-0.253969		0.127501	0.312313	-0.084795	-0.0620863	0.325734	0.290988	-0.0397266		-0.199527	0.117824	-0.148546	-0.535283	-0.209253	0.213637	-0.195459		0.200799	0.697303	0.105894		-0.367858	0.318879	-0.120631	0.380193	-0.460297	0.273901
-4.62343	0.143856	-0.270749	-0.0882898	0.279305	-0.141617	0.291701	-0.250584		0.0379959	0.288337	-0.00499356	0.0935041	0.284227	0.318673	-0.117593		-0.292599	0.193112	-0.143834	-0.48246	-0.00235117	0.202533	-0.275213		0.144855	0.842158	0.116883		-0.344554	0.260495	-0.125074	0.416713	-0.42244	0.28762
-4.56067	-0.138583	-0.166847	-0.323337	0.0773886	-0.00819173	0.325593	-0.123046		0.020074	0.28964	0.00014542	0.201709	0.215152	0.392103	-0.216253		-0.263274	0.251736	-0.00508331	-0.326574	0.0975795	0.282894	-0.393584		0.136863	0.897103	0.204795		-0.367041	0.221183	-0.124092	0.398524	-0.375197	0.338741
-4.49791	-0.355272	-0.107023	-0.419588	-0.0853757	0.0304488	0.332681	0.0399438		0.0997259	0.316219	-0.0822273	0.226717	0.145692	0.492633	-0.249008		-0.111402	0.239758	0.195391	-0.0329027	0.0597723	0.357811	-0.496089		0.133866	0.59041	0.393606		-0.374513	0.240463	-0.124157	0.378441	-0.295304	0.382425
-4.43515	-0.498094	-0.0861037	-0.303795	-0.126038	-0.0704315	0.303065	0.118373		0.240215	0.328184	-0.158462	0.206897	0.0951191	0.543764	-0.191186		0.0675765	0.170198	0.289983	0.225311	-0.0303467	0.341427	-0.512512		0.143856	0.487512	0.515485		-0.360123	0.269386	-0.131175	0.373758	-0.280626	0.383426
-4.37238	-0.580191	-0.0588135	-0.0968428	-0.0542395	-0.236519	0.24492	0.0595474		0.354438	0.286973	-0.121298	0.195174	0.0558295	0.485491	-0.102399		0.17169	0.104861	0.166604	0.229428	-0.0882078	0.256096	-0.425729		0.125874	0.537463	0.456543		-0.386668	0.290651	-0.135017	0.386021	-0.284648	0.362199
-4.30962	-0.606078	-0.00156902	-0.00480645	0.0632982	-0.362087	0.179135	-0.0791755		0.372068	0.200076	0.0408042	0.195992	0.00727504	0.34421	-0.0575911		0.180997	0.0918983	-0.10747	-0.0242187	-0.122604	0.199254	-0.298629		0.127872	0.728272	0.295704		-0.398498	0.281127	-0.134225	0.375394	-0.337098	0.281828
-4.24686	-0.575643	0.0542412	-0.115987	0.165031	-0.401004	0.119988	-0.182849		0.300277	0.118839	0.226609	0.164974	-0.0502108	0.216793	-0.0674828		0.157785	0.123672	-0.325815	-0.260668	-0.197366	0.223105	-0.224819		0.136863	0.851149	0.263736		-0.395713	0.26607	-0.159487	0.325968	-0.382736	0.279471
-4.1841	-0.515633	0.0533397	-0.30814	0.230593	-0.373937	0.0626407	-0.182191		0.21388	0.0900529	0.312548	0.06558	-0.0832921	0.179694	-0.0760575		0.167551	0.15275	-0.327794	-0.168821	-0.319496	0.269659	-0.246172		0.193806	0.804196	0.32967		-0.419292	0.258578	-0.162077	0.281688	-0.391765	0.252892
-4.12134	-0.486023	-0.0241203	-0.365799	0.271702	-0.316682	-0.00629574	-0.115547		0.180464	0.113231	0.261099	-0.0817077	-0.0568809	0.218911	-0.0305627		0.211941	0.143858	-0.154317	0.273923	-0.402878	0.237914	-0.318794		0.217782	0.636364	0.52048		-0.42007	0.283854	-0.16838	0.2505	-0.371004	0.28819
-4.05858	-0.529294	-0.138513	-0.19453	0.298252	-0.250362	-0.0863731	-0.0918012		0.196359	0.148698	0.145076	-0.208669	0.0208285	0.256018	0.0598628		0.242906	0.108165	-0.0156485	0.735992	-0.362688	0.106119	-0.36324		0.216783	0.546454	0.648352		-0.40942	0.287901	-0.166212	0.257192	-0.35678	0.339332
-3.99582	-0.605604	-0.223218	0.0820893	0.296202	-0.199255	-0.157666	-0.18601		0.199938	0.164666	0.0721644	-0.254452	0.0920236	0.239701	0.138752		0.230749	0.0896663	-0.0935112	0.818222	-0.228574	-0.0332469	-0.347819		0.151848	0.575425	0.511489		-0.398288	0.253239	-0.142321	0.274508	-0.397457	0.361942
-3.93305	-0.596474	-0.235999	0.238565	0.239056	-0.204931	-0.202374	-0.363716		0.145379	0.168972	0.0886385	-0.210883	0.0965384	0.200107	0.163986		0.200168	0.121636	-0.365434	0.421838	-0.13102	-0.0700067	-0.316966		0.0759241	0.681319	0.220779		-0.419275	0.188016	-0.127538	0.272383	-0.41507	0.304286
-3.87029	-0.400911	-0.180381	0.157047	0.121654	-0.292641	-0.228911	-0.50674		0.0540554	0.190605	0.152356	-0.119582	0.0278043	0.206105	0.143742		0.193443	0.195433	-0.6191	-0.165047	-0.163123	0.00150412	-0.33327		0.021978	0.717283	0.0659341		-0.463797	0.10575	-0.121313	0.277805	-0.488106	0.206684
-3.80753	-0.0422644	-0.0879042	-0.0784298	-0.0184883	-0.423693	-0.265322	-0.519875		-0.0127729	0.234526	0.189787	-0.0325881	-0.0611486	0.275027	0.115117		0.211603	0.266645	-0.639562	-0.541046	-0.274131	0.0720886	-0.395658		0.00699301	0.635365	0.030969		-0.486375	0.0875253	-0.112527	0.287793	-0.507067	0.174669
-3.74477	0.327399	0.00900536	-0.285686	-0.118219	-0.505176	-0.323151	-0.420162		-0.0264752	0.264189	0.171042	0.0235938	-0.109263	0.337697	0.10242		0.211532	0.288383	-0.391354	-0.542716	-0.322109	0.0334952	-0.426452		0.003996	0.46953	0.0529471		-0.502292	0.0616958	-0.11509	0.315156	-0.450056	0.178425
-3.68201	0.544699	0.0869188	-0.364933	-0.13409	-0.467044	-0.372511	-0.323457		-0.0245663	0.235016	0.128835	0.0551911	-0.103798	0.300487	0.104769		0.166354	0.242734	-0.0363386	-0.331869	-0.228961	-0.105472	-0.34905		0.011988	0.310689	0.202797		-0.490851	0.0970272	-0.12344	0.322765	-0.379354	0.247742
-3.61925	0.565505	0.128198	-0.367624	-0.0767635	-0.328997	-0.363857	-0.337888		-0.0673566	0.144366	0.111664	0.0852335	-0.0854854	0.14008	0.115233		0.113558	0.149661	0.207718	-0.169399	-0.0598945	-0.229082	-0.177499		0.046953	0.236763	0.554446		-0.450616	0.176126	-0.164674	0.279936	-0.302667	0.298572
-3.55649	0.480235	0.123855	-0.397586	-0.00328755	-0.180134	-0.280825	-0.461809		-0.168891	0.043405	0.127309	0.133507	-0.102302	-0.0679881	0.135121		0.123193	0.0525722	0.226503	-0.143961	0.0617215	-0.238786	-0.0184964		0.140859	0.18981	0.971029		-0.433336	0.202627	-0.188232	0.272967	-0.279129	0.319953
-3.49372	0.404084	0.0851111	-0.470537	0.0254762	-0.0905685	-0.167406	-0.580852		-0.281386	-0.00432659	0.135442	0.203269	-0.162732	-0.215131	0.164116		0.212952	-0.00730413	0.0589899	-0.134453	0.0981081	-0.155233	0.0260711		0.177822	0.182817	0.875125		-0.458284	0.15251	-0.2162	0.253723	-0.245419	0.32214
-3.43096	0.363657	0.045657	-0.493328	-0.0146108	-0.0524054	-0.0930579	-0.566863		-0.348091	0.0224707	0.0923021	0.276286	-0.232274	-0.251978	0.187873		0.30764	-0.0139398	-0.168741	-0.00532526	0.125812	-0.0888624	-0.0394388		0.162837	0.243756	0.96004		-0.461771	0.174425	-0.210424	0.237358	-0.270679	0.313475
-3.3682	0.29957	0.0425748	-0.381938	-0.101646	-0.0112878	-0.0852101	-0.388412		-0.36007	0.08769	-0.00186515	0.318765	-0.267264	-0.218843	0.189265		0.299438	0.0139737	-0.340224	0.211328	0.217898	-0.114659	-0.10592		0.267732	0.407592	0.913087		-0.406219	0.212293	-0.203489	0.22144	-0.290658	0.328204
-3.30544	0.170461	0.0899124	-0.179446	-0.186995	0.058107	-0.0985773	-0.135484		-0.351608	0.13339	-0.0991908	0.301276	-0.247479	-0.194655	0.172208		0.153424	0.0337115	-0.401435	0.345351	0.329078	-0.189045	-0.0682615		0.595405	0.766234	0.871129		-0.354234	0.263292	-0.204258	0.218524	-0.317054	0.318937
-3.24268	0.0293311	0.170878	-0.0357258	-0.221709	0.127472	-0.0572447	0.057249		-0.345336	0.128066	-0.142849	0.224266	-0.18354	-0.223143	0.162793		-0.053035	0.00714221	-0.361605	0.272841	0.332834	-0.197342	0.0667608		0.823177	0.732268	0.867133		-0.282633	0.314792	-0.210298	0.214992	-0.359218	0.281287
-3.17992	-0.0213129	0.255923	-0.0650132	-0.177098	0.166746	0.069393	0.114555		-0.318303	0.082596	-0.107101	0.126955	-0.107155	-0.285378	0.179122		-0.201468	-0.0686875	-0.270083	0.037368	0.174667	-0.0775394	0.184663		0.455544	0.40959	0.814186		-0.203988	0.362743	-0.219056	0.209814	-0.350673	0.272737
-3.11715	0.0551411	0.326565	-0.233018	-0.0605444	0.19918	0.232212	0.0631921		-0.231761	0.0265297	-0.00516275	0.0635647	-0.0590925	-0.331829	0.205622		-0.240974	-0.152694	-0.184997	-0.211528	-0.042249	0.112699	0.177716		0.313686	0.202797	0.65035		-0.159604	0.389906	-0.202503	0.197872	-0.379732	0.256692
-3.05439	0.179308	0.381389	-0.393185	0.0769978	0.282447	0.343132	-0.010882		-0.0865666	-0.0235084	0.130075	0.0598847	-0.0728675	-0.331486	0.208053		-0.223564	-0.185346	-0.136319	-0.367071	-0.151413	0.252848	0.0546054		0.225774	0.106893	0.455544		-0.136662	0.399999	-0.213498	0.185154	-0.39339	0.253559
-2.99163	0.233388	0.423821	-0.430255	0.158057	0.434763	0.34926	-0.0388181		0.0666609	-0.0704645	0.26368	0.0879226	-0.148834	-0.292314	0.175464		-0.237273	-0.134353	-0.101773	-0.429386	-0.0981076	0.274583	-0.0656001		0.123876	0.0529471	0.445554		-0.134919	0.460388	-0.20605	0.200407	-0.404077	0.230041
-2.92887	0.181644	0.451559	-0.357357	0.126104	0.599051	0.268799	-0.0103988		0.177256	-0.118202	0.359783	0.0866581	-0.237239	-0.245222	0.137411		-0.315624	-0.0246786	-0.0261438	-0.441414	0.00586418	0.214611	-0.0685528		0.0529471	0.0519481	0.671329		-0.10797	0.488953	-0.229444	0.196551	-0.404684	0.257139
-2.86611	0.0991077	0.4611	-0.271021	-0.0065068	0.69416	0.161051	0.0412016		0.242736	-0.154963	0.379751	0.0159552	-0.263014	-0.2159	0.130987		-0.416997	0.0755913	0.117608	-0.407875	0.0154062	0.159799	0.0469179		0.032967	0.100899	0.96004		-0.1021	0.50509	-0.235066	0.180135	-0.381832	0.315334
-2.80335	0.0789491	0.458214	-0.227625	-0.158872	0.693264	0.0697224	0.0798451		0.294238	-0.160909	0.296257	-0.103091	-0.191953	-0.208833	0.154747		-0.481385	0.106681	0.280539	-0.30385	-0.076805	0.154419	0.172656		0.034965	0.202797	0.657343		-0.0967601	0.460141	-0.247055	0.168882	-0.337003	0.365044
-2.74059	0.126086	0.456567	-0.186445	-0.243388	0.63386	-0.00177593	0.0902413		0.336805	-0.132363	0.117987	-0.199595	-0.0813858	-0.209132	0.167191		-0.489638	0.0645164	0.363016	-0.143278	-0.12988	0.169855	0.198077		0.045954	0.2997	0.541459		-0.0996571	0.43011	-0.236084	0.145462	-0.311126	0.373796
-2.67782	0.155385	0.462824	-0.0805059	-0.237837	0.550239	-0.0662901	0.0739992		0.323323	-0.0952824	-0.101935	-0.209003	-0.0500891	-0.195228	0.13602		-0.4624	0.00236264	0.304	0.00332316	-0.0224845	0.158624	0.111411		0.044955	0.28971	0.496503		-0.116421	0.433263	-0.248203	0.143113	-0.296892	0.336931
-2.61506	0.0885616	0.466068	0.075038	-0.195458	0.420842	-0.115803	0.0366946		0.204699	-0.0902718	-0.290159	-0.126524	-0.173267	-0.154717	0.0804909		-0.417011	-0.0164977	0.150048	0.0777264	0.188704	0.121119	0.000637887		0.026973	0.271728	0.35964		-0.142363	0.452412	-0.298691	0.109907	-0.303873	0.335575
-2.5523	-0.0666667	0.446575	0.173349	-0.179531	0.207521	-0.114913	-0.0156967		0.00347502	-0.139802	-0.3935	-0.0124543	-0.395312	-0.0965004	0.0524131		-0.347087	0.0264268	0.0277367	0.101126	0.302951	0.106905	-0.0358114		0.022977	0.495504	0.145854		-0.181931	0.424763	-0.361475	0.0612007	-0.291033	0.361398
-2.48954	-0.240831	0.396525	0.128824	-0.191716	-0.0565066	-0.0311627	-0.0729239		-0.180934	-0.226783	-0.40229	0.0545122	-0.555368	-0.0508545	0.0727252		-0.249107	0.0924441	0.0369799	0.145633	0.175049	0.152262	0.0253792		0.047952	0.973027	0.041958		-0.263646	0.362873	-0.396671	0.0044212	-0.266992	0.409523
-2.42678	-0.387332	0.330375	-0.00948359	-0.175358	-0.249094	0.129441	-0.121492		-0.255816	-0.304716	-0.34253	0.0367082	-0.518323	-0.0530657	0.0969026		-0.151596	0.126697	0.164953	0.239354	-0.127857	0.228139	0.127807		0.111888	0.4995	0.018981		-0.334555	0.310067	-0.393397	-0.0192374	-0.242732	0.455072
-2.36402	-0.516656	0.273446	-0.0789836	-0.0928959	-0.258412	0.315215	-0.152855		-0.223605	-0.332348	-0.254164	-0.0380481	-0.294763	-0.118899	0.054648		-0.0967616	0.112126	0.301355	0.325869	-0.376698	0.259273	0.200791		0.148851	0.427572	0.024975		-0.333454	0.262837	-0.354397	0.00853128	-0.268968	0.472679
-2.30126	-0.642539	0.240597	0.0458549	0.0123189	-0.102001	0.45527	-0.167871		-0.177103	-0.304568	-0.178577	-0.103968	-0.0351722	-0.230066	-0.0739985		-0.0896865	0.0822871	0.335958	0.33572	-0.387554	0.195701	0.220698		0.0829171	0.682318	0.048951		-0.260254	0.338351	-0.331024	0.027866	-0.266307	0.446835
-2.23849	-0.72164	0.225672	0.322605	0.0495846	0.0715905	0.498929	-0.169921		-0.202531	-0.254381	-0.154475	-0.111687	0.0976099	-0.341898	-0.227911		-0.0809148	0.0794339	0.245495	0.284226	-0.181221	0.0615803	0.213408		0.026973	0.886114	0.0519481		-0.207062	0.418169	-0.342389	0.0512094	-0.255162	0.4297
-2.17573	-0.681177	0.208527	0.568882	-0.0175205	0.113733	0.442247	-0.154783		-0.294263	-0.224988	-0.203168	-0.0648768	0.057575	-0.407614	-0.314957		-0.0146946	0.10127	0.100135	0.268461	0.0491783	-0.0683576	0.211363		0.014985	0.778222	0.037962		-0.204591	0.471175	-0.368565	0.0236954	-0.236977	0.410083
-2.11297	-0.515134	0.168684	0.629627	-0.115109	0.00589768	0.326713	-0.111995		-0.373201	-0.235846	-0.301545	-0.0111496	-0.0685753	-0.401848	-0.293299		0.106312	0.0951231	0.00172417	0.355966	0.114693	-0.138966	0.218844		0.01998	0.998002	0.021978		-0.238888	0.440407	-0.411938	0.0121292	-0.238326	0.414685
-2.05021	-0.329446	0.0933338	0.520556	-0.122928	-0.144671	0.210707	-0.0395818		-0.384752	-0.271023	-0.374097	0.00235567	-0.157378	-0.33058	-0.203838		0.216941	0.0122433	0.0152123	0.495151	-0.0193056	-0.161	0.216913		0.044955	0.757243	0.021978		-0.265709	0.376993	-0.42037	0.00105254	-0.252596	0.42222
-1.98745	-0.261253	-0.0201502	0.406088	-0.00145559	-0.227194	0.130287	0.0440271		-0.363187	-0.298354	-0.334936	-0.0306806	-0.152039	-0.226437	-0.127056		0.256839	-0.12968	0.135404	0.560562	-0.229342	-0.191638	0.191126		0.0709291	0.8002	0.046953		-0.284335	0.342936	-0.398218	0.0180404	-0.277709	0.39411
-1.92469	-0.344355	-0.160429	0.434531	0.153573	-0.225037	0.0773169	0.107874		-0.388515	-0.300637	-0.161562	-0.0745057	-0.0810641	-0.133794	-0.112389		0.234561	-0.244078	0.290517	0.488965	-0.352324	-0.273596	0.1466		0.136863	0.979021	0.167832		-0.255418	0.322628	-0.36232	0.0548452	-0.322806	0.37046
-1.86192	-0.468628	-0.298549	0.593074	0.196831	-0.190208	0.0161068	0.133298		-0.485679	-0.289851	0.0665804	-0.0889869	0.00063769	-0.0875208	-0.146098		0.213327	-0.246985	0.373955	0.351801	-0.311201	-0.392892	0.0988998		0.274725	0.9001	0.36963		-0.319471	0.331585	-0.336936	0.0814837	-0.340574	0.365737
-1.79916	-0.487012	-0.395065	0.721628	0.0783888	-0.14999	-0.0715644	0.133154		-0.583352	-0.291793	0.215779	-0.0698094	0.068688	-0.0925946	-0.175999		0.233246	-0.140584	0.303945	0.280229	-0.154755	-0.490573	0.0593146		0.522478	0.922078	0.466533		-0.340056	0.326605	-0.323164	0.105036	-0.313666	0.374195
-1.7364	-0.360156	-0.421958	0.667235	-0.101043	-0.0752992	-0.156144	0.145039		-0.583956	-0.316882	0.203002	-0.0512789	0.129042	-0.119147	-0.15804		0.261105	-0.0264449	0.0925837	0.327865	-0.000577015	-0.510904	0.0338023		0.752248	0.734266	0.487512		-0.37054	0.300672	-0.299074	0.129982	-0.337754	0.380558
-1.67364	-0.18388	-0.385011	0.42885	-0.184276	0.0524089	-0.183226	0.201461		-0.471166	-0.346141	0.064111	-0.0676006	0.181874	-0.123852	-0.0833411		0.229021	-0.0269608	-0.132273	0.423987	0.0647889	-0.440927	0.0314333		0.742258	0.838162	0.585415		-0.38176	0.296944	-0.299566	0.142572	-0.379092	0.350837
-1.61088	-0.074033	-0.324665	0.160169	-0.107309	0.176166	-0.136885	0.301874		-0.336186	-0.346376	-0.0822932	-0.111474	0.205795	-0.086503	0.0236738		0.119212	-0.180674	-0.201684	0.460455	0.0558407	-0.313391	0.064213		0.555445	0.799201	0.795205		-0.30563	0.317409	-0.304926	0.160455	-0.404738	0.317431
-1.54812	-0.0411238	-0.289534	0.0367613	0.0442479	0.204374	-0.079219	0.411124		-0.289208	-0.299968	-0.142118	-0.135366	0.181498	-0.0294651	0.120701		-0.00469435	-0.405749	-0.0428609	0.404018	0.0761795	-0.181081	0.133273		0.414585	0.587413	0.881119		-0.297854	0.385452	-0.28319	0.167083	-0.403576	0.331983
-1.48536	0.0067689	-0.302225	0.113395	0.122208	0.122084	-0.112213	0.486618		-0.344453	-0.220754	-0.118447	-0.0997024	0.121131	0.00319636	0.164945		-0.059881	-0.565369	0.240637	0.310065	0.225522	-0.0889932	0.21824		0.445554	0.791209	0.669331		-0.298705	0.42161	-0.272516	0.19943	-0.386494	0.400926
-1.42259	0.14491	-0.345245	0.291904	0.053383	0.0318328	-0.283707	0.512429		-0.395598	-0.141616	-0.0807347	-0.0215537	0.065971	-0.00907068	0.132606		-0.0316128	-0.576016	0.440487	0.241169	0.494323	-0.0612446	0.287756		0.64036	0.72028	0.372627		-0.331116	0.443759	-0.265088	0.22011	-0.300966	0.491377
-1.35983	0.34058	-0.376946	0.41154	-0.104559	0.0549638	-0.526493	0.512723		-0.306826	-0.0866101	-0.072252	0.0297505	0.0560462	-0.0395431	0.0360435		0.0141957	-0.463221	0.420066	0.20166	0.744598	-0.100395	0.326169		0.826174	0.41958	0.198801		-0.367136	0.399981	-0.253358	0.231104	-0.254448	0.585764
-1.29707	0.495406	-0.362332	0.373053	-0.227653	0.196005	-0.69969	0.533399		-0.0322658	-0.0533363	-0.0625373	-0.00577388	0.10444	-0.0399681	-0.0775381		0.00876998	-0.322519	0.230227	0.161715	0.815794	-0.189594	0.350719		0.901099	0.443556	0.236763		-0.366222	0.373689	-0.269351	0.251421	-0.246366	0.577639
-1.23431	0.567713	-0.295113	0.198286	-0.232823	0.332135	-0.703272	0.606152		0.344301	-0.0190158	0.0022567	-0.1156	0.194766	0.00863295	-0.154749		-0.0392817	-0.231731	0.0459767	0.122212	0.673614	-0.294954	0.399782		0.841159	0.735265	0.522478		-0.310801	0.384508	-0.256692	0.273786	-0.321547	0.549731
-1.17155	0.628477	-0.199091	-0.00376464	-0.128267	0.350778	-0.559009	0.723601		0.676202	0.0386012	0.112881	-0.214015	0.291473	0.0747588	-0.173456		-0.0531604	-0.198467	-0.0115685	0.124842	0.455224	-0.373544	0.500525		0.795205	0.913087	0.915085		-0.253682	0.429538	-0.214893	0.322545	-0.366904	0.516775
-1.10879	0.784566	-0.112716	-0.120905	0.0167371	0.27903	-0.380565	0.846113		0.859483	0.124217	0.182108	-0.21156	0.350289	0.10948	-0.155014		0.0219784	-0.18239	0.0209483	0.194306	0.347292	-0.390397	0.644395		0.78022	0.774226	0.989011		-0.201383	0.502933	-0.182625	0.38443	-0.33468	0.535186
-1.04603	1.05846	-0.0667453	-0.107804	0.130456	0.248911	-0.266425	0.935325		0.889453	0.222356	0.130522	-0.0938324	0.334728	0.0981534	-0.138412		0.147138	-0.155565	0.0279302	0.295239	0.40382	-0.338291	0.791033		0.637363	0.831169	0.855145		-0.171083	0.589693	-0.148033	0.427235	-0.300043	0.640675
-0.983264	1.36184	-0.0640214	-0.00532096	0.171998	0.33388	-0.225035	0.986032		0.837203	0.306666	-0.0163764	0.0632091	0.244549	0.0732984	-0.142232		0.214976	-0.133311	-0.021119	0.367503	0.490346	-0.247269	0.894716		0.452547	0.8002	0.664336		-0.166132	0.697129	-0.165922	0.444458	-0.263922	0.70672
-0.920502	1.58895	-0.0710489	0.0914104	0.135201	0.451099	-0.200576	1.02762		0.783258	0.35423	-0.132404	0.156367	0.133971	0.0751712	-0.152688		0.146184	-0.147774	-0.0195776	0.396222	0.423824	-0.173919	0.929343		0.312687	0.646354	0.61039		-0.163235	0.789468	-0.209076	0.443672	-0.30058	0.752152
-0.857741	1.7198	-0.0310733	0.0946497	0.046758	0.453782	-0.156707	1.09235		0.766826	0.359919	-0.104309	0.139248	0.0843386	0.107091	-0.146429		-0.0424614	-0.199711	0.146957	0.422279	0.169832	-0.171985	0.89424		0.262737	0.487512	0.776224		-0.154512	0.816959	-0.235347	0.438035	-0.400384	0.736068
-0.794979	1.8212	0.101944	-0.0161862	-0.0373464	0.312147	-0.11797	1.17938		0.781334	0.345003	0.0584249	0.0525866	0.134983	0.137914	-0.118693		-0.261723	-0.244434	0.437183	0.475817	-0.113836	-0.258863	0.803873		0.312687	0.372627	0.908092		-0.171131	0.835344	-0.187036	0.473658	-0.511486	0.698901
-0.732218	1.9607	0.328219	-0.171878	-0.055173	0.166879	-0.12634	1.25063		0.806049	0.351014	0.23313	-0.021157	0.234392	0.14641	-0.0845397		-0.431401	-0.228498	0.656899	0.520264	-0.240929	-0.399151	0.67766		0.378621	0.261738	0.639361		-0.164175	0.890489	-0.188044	0.508384	-0.565377	0.68598
-0.669456	2.14735	0.59457	-0.250391	0.0185771	0.180463	-0.173509	1.26644		0.840824	0.415386	0.304433	-0.0316082	0.27475	0.150251	-0.0551321		-0.535464	-0.139556	0.645509	0.486039	-0.194401	-0.520345	0.539962		0.323676	0.147852	0.401598		-0.0979947	0.993504	-0.160492	0.573497	-0.624897	0.648328
-0.606695	2.3678	0.825443	-0.159399	0.148527	0.350751	-0.197307	1.22936		0.914267	0.542597	0.269796	0.00490718	0.193617	0.180442	-0.0205427		-0.608085	-0.0190456	0.446741	0.356288	-0.139759	-0.556716	0.424299		0.177822	0.034965	0.255744		-0.00395327	1.13044	-0.134309	0.628974	-0.641802	0.591233
-0.543933	2.65695	0.970534	0.0907404	0.268329	0.504894	-0.151803	1.19254		1.05838	0.696606	0.222056	0.0344083	0.0448512	0.231291	0.0391429		-0.683046	0.0742028	0.26721	0.193457	-0.233932	-0.494937	0.368192		0.0919081	0.00699301	0.166833		0.067091	1.27954	-0.133208	0.675407	-0.664913	0.527656
-0.481172	3.09247	1.03083	0.38378	0.344725	0.488567	-0.0689096	1.21943		1.27159	0.827301	0.235146	0.0221736	-0.04288	0.252132	0.128192		-0.763973	0.113617	0.258606	0.067971	-0.438198	-0.387032	0.394275		0.0539461	0.002997	0.10989		0.143496	1.38172	-0.135713	0.743133	-0.677685	0.512819
-0.41841	3.69627	1.04469	0.57524	0.410594	0.337331	-0.0339375	1.32873		1.50625	0.911039	0.282786	-0.0183049	0.0114057	0.201436	0.226769		-0.833879	0.122097	0.362065	-0.0192173	-0.546469	-0.31512	0.49032		0.0519481	0.004995	0.0969031		0.194845	1.43085	-0.0995866	0.801718	-0.681377	0.569943
-0.355649	4.35209	1.05254	0.593036	0.526313	0.232599	-0.0951461	1.47573		1.69901	0.966589	0.27921	-0.0464915	0.160695	0.10619	0.311001		-0.877518	0.144839	0.39056	-0.113376	-0.406375	-0.329621	0.607876		0.0669331	0.003996	0.0929071		0.249391	1.5127	-0.0606636	0.883019	-0.676444	0.597823
-0.292887	4.8514	1.07486	0.478629	0.70589	0.291119	-0.205525	1.58913		1.82049	1.02915	0.192159	-0.0385344	0.277468	0.0532224	0.379532		-0.889336	0.206975	0.258818	-0.207547	-0.095038	-0.408321	0.687296		0.0659341	0.002997	0.0949051		0.27726	1.61652	-0.026212	0.957774	-0.708543	0.640506
-0.230126	5.04688	1.11719	0.33667	0.888051	0.429895	-0.263055	1.63134		1.89599	1.10983	0.0961875	-0.00797341	0.279977	0.110542	0.457159		-0.869336	0.295131	0.0992952	-0.207831	0.145783	-0.471378	0.694657		0.0599401	0.001998	0.0899101		0.311453	1.69268	-0.00733463	0.979688	-0.681751	0.682312
-0.167364	4.97174	1.18467	0.244192	0.988235	0.462728	-0.208994	1.62775		1.97248	1.18755	0.100764	0.0153963	0.203504	0.258007	0.571626		-0.822276	0.376179	0.12594	-0.0360478	0.152914	-0.441601	0.643182		0.0679321	0.001998	0.0779221		0.327062	1.70672	0.0673988	1.02142	-0.640061	0.71044
-0.104603	4.81034	1.28217	0.2056	0.980074	0.317985	-0.0821	1.64014		2.06471	1.24732	0.229112	0.024914	0.145011	0.40303	0.727429		-0.759343	0.43265	0.392043	0.238103	0.00873862	-0.298901	0.581623		0.0999001	0.00799201	0.0739261		0.354963	1.689	0.114602	1.09731	-0.587784	0.768684
-0.041841	4.7527	1.4004	0.188934	0.921451	0.128019	0.0234469	1.71037		2.1409	1.32392	0.382878	0.0535398	0.150776	0.468072	0.901059		-0.689013	0.482623	0.714388	0.412864	-0.0424858	-0.0822057	0.558328		0.157842	0.015984	0.0959041		0.407124	1.69213	0.168549	1.17307	-0.488052	0.835097
0.0209205	4.87198	1.51125	0.191638	0.898898	0.0882492	0.0471107	1.82635		2.16894	1.49495	0.437289	0.148532	0.176365	0.460068	1.05911		-0.600282	0.568277	0.856673	0.341143	0.159196	0.158943	0.590158		0.225774	0.023976	0.116883		0.389468	1.78234	0.227625	1.26269	-0.394369	1.01107
0.083682	5.12173	1.58639	0.252548	0.950001	0.245669	0.0076619	1.93869		2.17298	1.81584	0.369405	0.325853	0.1588	0.452864	1.18144		-0.463611	0.723765	0.777184	0.097826	0.532103	0.412663	0.661097		0.267732	0.037962	0.158841		0.465692	1.86993	0.315281	1.39736	-0.280039	1.14835
0.146444	5.42004	1.62395	0.389325	1.04227	0.452093	-0.0286258	2.01005		2.22867	2.25454	0.283595	0.546903	0.107199	0.507431	1.27307		-0.262603	0.94793	0.670088	-0.0712539	0.835147	0.703558	0.749056		0.357642	0.0539461	0.194805		0.532702	2.01852	0.429201	1.55546	-0.15757	1.28554
0.209205	5.71592	1.65341	0.534065	1.12153	0.526671	-0.0102911	2.05202		2.38871	2.69436	0.306026	0.741693	0.0978527	0.615914	1.36139		-0.027596	1.20185	0.752781	0.0154337	0.895364	1.04441	0.854192		0.543457	0.0959041	0.236763		0.563325	2.10877	0.534685	1.71189	0.0297778	1.43143
0.271967	5.98433	1.71044	0.559085	1.17006	0.440542	0.0698058	2.11896		2.61286	3.01107	0.457811	0.860013	0.176881	0.720511	1.48337		0.174679	1.43198	1.02818	0.305329	0.754873	1.39396	1.00112		0.817183	0.235764	0.298701		0.606781	2.15471	0.695733	1.89585	0.150198	1.70067
0.334728	6.19175	1.80626	0.395757	1.21349	0.325663	0.188722	2.26625		2.78437	3.15732	0.637169	0.904743	0.289077	0.773712	1.6672		0.298954	1.60118	1.27761	0.593773	0.611214	1.67006	1.21193		0.975025	0.433566	0.370629		0.624135	2.19405	0.809222	2.06174	0.279634	1.87945
0.39749	6.29785	1.92216	0.136721	1.28016	0.317698	0.314942	2.50753		2.8081	3.17936	0.72481	0.916836	0.32585	0.770747	1.91434		0.369179	1.70435	1.29048	0.759106	0.630813	1.81069	1.47462		0.978022	0.505495	0.460539		0.67914	2.25936	0.856362	2.1297	0.364507	2.00465
0.460251	6.2954	2.03079	0.000594129	1.36742	0.420742	0.411918	2.80229		2.69525	3.15809	0.699876	0.927842	0.245039	0.730926	2.19252		0.455747	1.7576	1.08549	0.8741	0.816392	1.82326	1.73737		0.819181	0.466533	0.579421		0.714744	2.36869	0.833714	2.16369	0.413534	2.11102
0.523013	6.23135	2.11735	0.15955	1.45154	0.533565	0.439742	3.07942		2.54855	3.13768	0.648923	0.92872	0.125402	0.667675	2.44889		0.5951	1.77189	0.893299	1.06339	1.03026	1.77242	1.93754		0.528472	0.376623	0.726274		0.844055	2.54149	0.823266	2.16052	0.497254	2.21971
0.585774	6.17139	2.17773	0.573983	1.5201	0.580229	0.37829	3.27773		2.46405	3.10783	0.666733	0.887894	0.0881196	0.589994	2.63888		0.737352	1.73684	0.926405	1.28481	1.12435	1.71963	2.04425		0.342657	0.321678	0.87013		0.971097	2.67069	0.87052	2.16261	0.578474	2.29378
0.648536	6.14185	2.20207	0.995507	1.58112	0.581666	0.256913	3.37705		2.45174	3.04269	0.757374	0.799532	0.169511	0.524955	2.75099		0.789285	1.63336	1.17765	1.31679	1.05268	1.67756	2.08004		0.264735	0.272727	0.893107		1.00813	2.7669	0.877658	2.1896	0.639147	2.27802
0.711297	6.11238	2.17033	1.15602	1.63814	0.600147	0.148439	3.40402		2.45095	2.942	0.834582	0.707797	0.287297	0.516566	2.80901		0.717949	1.46699	1.44268	0.997447	0.885478	1.62464	2.10262		0.238761	0.223776	0.777223		0.986042	2.83835	0.881886	2.19873	0.583651	2.25245
0.774059	6.0366	2.06941	0.985882	1.66753	0.649354	0.115627	3.41344		2.41091	2.8296	0.811575	0.674582	0.337616	0.587865	2.85159		0.603768	1.2901	1.52192	0.451131	0.735906	1.55796	2.15918		0.278721	0.184815	0.619381		0.946123	2.82969	0.871982	2.18155	0.515191	2.19863
0.83682	5.90264	1.91099	0.6692	1.63248	0.68921	0.15647	3.45839		2.34093	2.72085	0.682857	0.71879	0.31149	0.708837	2.90673		0.574962	1.18444	1.38759	0.0244185	0.669206	1.51933	2.24945		0.340659	0.17982	0.51049		0.85277	2.73787	0.87306	2.13246	0.448539	2.1326
0.899582	5.73965	1.72529	0.48863	1.52063	0.69891	0.207078	3.56393		2.28115	2.60627	0.521378	0.790638	0.298438	0.81648	2.97888		0.681207	1.2086	1.16695	-0.0300546	0.662991	1.55997	2.33005		0.425574	0.241758	0.548452		0.799329	2.62333	0.888753	2.07678	0.429641	2.12737
0.962343	5.58249	1.53572	0.600082	1.35991	0.716009	0.203656	3.71448		2.24182	2.47261	0.408567	0.812822	0.375233	0.873524	3.05207		0.838284	1.35021	0.997342	0.208203	0.645132	1.68031	2.36025		0.471528	0.323676	0.671329		0.811135	2.54642	0.894812	2.05451	0.525762	2.2363
1.0251	5.44256	1.34541	0.930368	1.19179	0.780314	0.140758	3.85907		2.19121	2.33223	0.375583	0.75074	0.508739	0.901125	3.10224		0.909358	1.52544	0.921603	0.425055	0.577262	1.81472	2.35252		0.451548	0.364635	0.777223		0.804706	2.52801	0.903328	2.02073	0.498756	2.28225
1.08787	5.31677	1.15382	1.26606	1.03409	0.857236	0.0675534	3.93439		2.10456	2.2193	0.404623	0.64093	0.584084	0.945548	3.11213		0.846115	1.63203	0.91131	0.399307	0.508851	1.88487	2.37987		0.431568	0.398601	0.841159		0.809297	2.51748	0.89885	2.02061	0.534314	2.28769
1.15063	5.21526	0.982859	1.42967	0.87965	0.854066	0.0332302	3.89956		2.00648	2.15296	0.46667	0.549446	0.526268	1.01508	3.08476		0.745447	1.61651	0.948095	0.207765	0.539754	1.87004	2.52336		0.470529	0.482517	0.937063		0.754406	2.45203	0.859995	2.02066	0.517699	2.30249
1.21339	5.16774	0.874078	1.38485	0.732299	0.726847	0.0455635	3.76667		1.94767	2.11107	0.542637	0.506516	0.380074	1.06057	3.04751		0.760188	1.5036	1.04485	0.100496	0.709981	1.82099	2.79674		0.586414	0.787213	0.818182		0.66979	2.30354	0.797502	1.98178	0.534415	2.41659
1.27615	5.19978	0.850045	1.20858	0.631046	0.549871	0.0823112	3.60468		1.94182	2.04932	0.612564	0.488395	0.264568	1.02389	3.03693		0.950769	1.36798	1.18913	0.206169	0.922849	1.80301	3.11488		0.736264	0.736264	0.506494		0.58372	2.218	0.75143	1.96501	0.619653	2.52758
1.33891	5.30787	0.879392	0.998706	0.622031	0.450145	0.127486	3.50361		1.9437	1.94743	0.645208	0.462483	0.25908	0.899921	3.06816		1.22391	1.27677	1.30372	0.400588	1.00134	1.82989	3.34472		0.779221	0.445554	0.264735		0.533376	2.17058	0.704383	1.91893	0.722608	2.65968
1.40167	5.45926	0.890851	0.817319	0.701101	0.469861	0.179254	3.51522		1.90121	1.83069	0.616696	0.438247	0.3451	0.742511	3.11433		1.4151	1.25065	1.30267	0.46748	0.852106	1.85923	3.40602		0.712288	0.440559	0.228771		0.520824	2.17873	0.679685	1.90238	0.736128	2.71364
1.46444	5.60959	0.832245	0.69694	0.794559	0.516736	0.222912	3.61325		1.8206	1.74159	0.540974	0.459114	0.453038	0.611474	3.12314		1.42994	1.26769	1.19487	0.347738	0.58011	1.85063	3.33762		0.637363	0.612388	0.305694		0.538423	2.18333	0.665087	1.90168	0.677973	2.63693
1.5272	5.7158	0.717771	0.659659	0.812657	0.46894	0.217385	3.71134		1.76152	1.69318	0.469962	0.540993	0.542244	0.524776	3.06577		1.31019	1.29384	1.10682	0.19152	0.41454	1.81897	3.2664		0.667333	0.743257	0.401598		0.545665	2.24783	0.662695	1.88153	0.603549	2.54372
1.58996	5.74137	0.612471	0.706228	0.729448	0.32036	0.130944	3.73172		1.76102	1.65693	0.453102	0.631675	0.618474	0.467948	2.97442		1.17539	1.30613	1.16954	0.17127	0.489237	1.82224	3.30054		0.791209	0.619381	0.388611		0.454098	2.2202	0.655816	1.85442	0.629138	2.56531
1.65272	5.66985	0.566303	0.79522	0.604652	0.197902	-0.00702963	3.66865		1.7758	1.59763	0.496302	0.649199	0.683723	0.438642	2.92439		1.11226	1.2929	1.37101	0.284463	0.691605	1.89818	3.43955		0.954046	0.380619	0.250749		0.32484	2.19879	0.657805	1.84489	0.68215	2.66071
1.71548	5.5266	0.564861	0.859721	0.518393	0.2256	-0.107385	3.58778		1.71739	1.51424	0.565189	0.567975	0.700123	0.462016	2.96721		1.12005	1.24413	1.53824	0.365184	0.753903	2.02143	3.58174		0.99001	0.260739	0.157842		0.294416	2.15223	0.611114	1.82449	0.74212	2.82114
1.77824	5.37853	0.548126	0.862282	0.484434	0.387168	-0.0926213	3.55901		1.5465	1.44005	0.627767	0.458535	0.625967	0.554555	3.0754		1.14636	1.15232	1.49485	0.268364	0.52125	2.12783	3.62064		0.891109	0.306693	0.171828		0.341573	2.15525	0.588178	1.81278	0.690227	2.78945
1.841	5.28983	0.476647	0.830524	0.437365	0.542874	0.0300782	3.58611		1.31855	1.40388	0.686195	0.427209	0.481892	0.68552	3.15716		1.15541	1.02596	1.25103	0.0026157	0.13255	2.17609	3.54004		0.805195	0.476523	0.302697		0.335349	2.13947	0.583721	1.77943	0.495539	2.64249
1.90377	5.26382	0.373426	0.826759	0.313938	0.581578	0.176265	3.60328		1.12481	1.3991	0.762184	0.509042	0.357191	0.793069	3.13443		1.15299	0.897374	1.02528	-0.324182	-0.0822432	2.17752	3.42201		0.838162	0.656344	0.476523		0.338492	2.12511	0.587065	1.77892	0.416666	2.52277
1.96653	5.23548	0.295878	0.879278	0.144026	0.536436	0.269888	3.54366		0.996137	1.39603	0.858034	0.62463	0.333439	0.842966	3.01339		1.15441	0.809897	1.05039	-0.647771	0.0978117	2.16543	3.367		0.964036	0.608392	0.534466		0.318029	2.04649	0.596466	1.80122	0.359361	2.51596
2.02929	5.13866	0.268452	0.951493	0.047278	0.536909	0.315722	3.40987		0.882652	1.38093	0.944921	0.651489	0.404946	0.858615	2.88026		1.14556	0.791658	1.33909	-0.989512	0.58069	2.14728	3.40679		0.936064	0.410589	0.374625		0.285419	2.04323	0.592378	1.77126	0.485541	2.60962
2.09205	4.98671	0.250519	0.984372	0.125957	0.655894	0.379411	3.27257		0.734829	1.37318	0.994106	0.542267	0.486916	0.88119	2.82633		1.08736	0.838682	1.64695	-1.35738	1.0533	2.09932	3.48871		0.989011	0.291708	0.216783		0.260592	2.0015	0.598389	1.75687	0.591626	2.68284
2.15481	4.87461	0.177768	0.961835	0.357355	0.824487	0.500674	3.19735		0.587882	1.39868	1.00995	0.371516	0.504647	0.90624	2.87312		0.95948	0.920907	1.68995	-1.65488	1.2681	2.00781	3.534		0.861139	0.340659	0.194805		0.339632	1.99418	0.575598	1.7484	0.587294	2.66599
2.21757	4.88553	0.0369203	0.920495	0.598565	0.904089	0.642148	3.17721		0.541236	1.45026	1.01893	0.265013	0.464495	0.878731	2.96389		0.794419	1.00249	1.41814	-1.7386	1.23345	1.90228	3.50433		0.764236	0.458541	0.286713		0.339303	2.00562	0.581524	1.74888	0.537504	2.58442
2.28033	4.9933	-0.103744	0.891538	0.705866	0.829544	0.733744	3.14263		0.645432	1.48212	1.02606	0.28452	0.429704	0.760743	3.02124		0.663232	1.05741	1.07515	-1.57455	1.13564	1.83573	3.41607		0.835165	0.591409	0.458541		0.29387	1.98867	0.580034	1.75864	0.425649	2.51566
2.3431	5.07031	-0.142695	0.847017	0.653139	0.668316	0.758352	3.03808		0.823195	1.44778	0.998071	0.381283	0.435963	0.592346	3.0109		0.623241	1.07224	0.973688	-1.30966	1.11004	1.83363	3.30543		0.986014	0.527473	0.5005		0.233394	1.89874	0.579656	1.75028	0.405446	2.42092
2.40586	5.00403	-0.0288936	0.722827	0.533719	0.545052	0.774063	2.88163		0.923221	1.34173	0.905629	0.454949	0.450461	0.464614	2.95688		0.674935	1.04395	1.20039	-1.16229	1.12099	1.87395	3.19489		0.909091	0.375624	0.384615		0.200822	1.84345	0.544921	1.73242	0.445789	2.44051
2.46862	4.80513	0.195901	0.50139	0.450702	0.526214	0.84311	2.74342		0.860114	1.20169	0.780051	0.44745	0.422679	0.426068	2.90684		0.766418	0.981492	1.54187	-1.23897	1.06206	1.92321	3.09537		0.979021	0.301698	0.244755		0.18885	1.8049	0.474508	1.69406	0.520955	2.46995
2.53138	4.59212	0.431203	0.260948	0.415438	0.583099	0.951441	2.66862		0.694265	1.07173	0.707673	0.376995	0.361569	0.430921	2.88959		0.840517	0.907069	1.70632	-1.46324	0.931581	1.98307	3.02627		0.776224	0.31968	0.192807		0.19079	1.80399	0.385319	1.60494	0.505052	2.48707
2.59414	4.46806	0.591714	0.126829	0.360209	0.646589	1.01904	2.63173		0.565991	0.967504	0.748658	0.292944	0.338657	0.397883	2.90073		0.881872	0.846652	1.61595	-1.67225	0.864578	2.08508	3.01351		0.64036	0.401598	0.176823		0.229332	1.82302	0.34526	1.57271	0.449249	2.52806
2.6569	4.42159	0.654363	0.165261	0.243212	0.67099	0.995985	2.5732		0.553869	0.877858	0.86155	0.217175	0.40446	0.318277	2.91705		0.921289	0.811005	1.47191	-1.75925	0.98358	2.23519	3.05733		0.63037	0.374625	0.155844		0.2242	1.82801	0.357514	1.54979	0.461758	2.51808
2.71967	4.35698	0.646188	0.325019	0.120654	0.642821	0.933836	2.47601		0.605977	0.793939	0.926717	0.139354	0.514295	0.284021	2.91736		0.992688	0.785174	1.52881	-1.71896	1.24651	2.37692	3.10814		0.698302	0.245754	0.106893		0.226957	1.80562	0.338413	1.55152	0.519635	2.62995
2.78243	4.21422	0.598534	0.484171	0.096138	0.557715	0.942809	2.39422		0.609763	0.728642	0.862102	0.0595706	0.558491	0.389715	2.89415		1.08285	0.741772	1.81811	-1.59	1.47199	2.42887	3.09		0.709291	0.125874	0.045954		0.208551	1.77696	0.313751	1.5367	0.595369	2.77605
2.84519	4.04135	0.516806	0.552672	0.195661	0.422878	1.07336	2.39858		0.516705	0.70443	0.716248	0.0134935	0.476069	0.611701	2.85567		1.12585	0.669451	2.11196	-1.4031	1.516	2.36485	2.9629		0.65035	0.114885	0.028971		0.214418	1.75565	0.280934	1.50638	0.59707	2.84835
2.90795	3.93854	0.389155	0.532603	0.307167	0.285929	1.25195	2.49743		0.386437	0.725861	0.63261	0.0395172	0.330298	0.806952	2.82095		1.05651	0.588273	2.16253	-1.20233	1.40249	2.24611	2.76766		0.601399	0.160839	0.034965		0.203095	1.73933	0.247377	1.49384	0.516047	2.76723
2.97071	3.9405	0.215709	0.492116	0.264036	0.231519	1.34744	2.61932		0.311429	0.769533	0.708952	0.122382	0.257097	0.848651	2.80664		0.878486	0.533637	1.9593	-1.0822	1.26946	2.16102	2.60513		0.708292	0.250749	0.107892		0.223873	1.70909	0.240273	1.51156	0.411376	2.64189
3.03347	3.97283	0.0241624	0.496769	0.00115674	0.315822	1.30309	2.67746		0.313829	0.803245	0.891149	0.183469	0.332614	0.758304	2.80967		0.678376	0.522894	1.73129	-1.14859	1.20419	2.1327	2.55991		0.972028	0.294705	0.220779		0.167324	1.63648	0.29609	1.57355	0.335731	2.54219
3.09623	3.93181	-0.143399	0.566907	-0.369916	0.496509	1.19607	2.64855		0.327612	0.814264	1.01304	0.14117	0.496836	0.686635	2.80206		0.560045	0.538828	1.69875	-1.41381	1.16036	2.09933	2.63176		0.757243	0.25974	0.30969		0.0788346	1.58922	0.350337	1.66106	0.27745	2.48999
3.159	3.7965	-0.258618	0.680409	-0.644356	0.646075	1.16278	2.58544		0.277472	0.818612	0.946345	-0.0130771	0.61477	0.755287	2.75173		0.551639	0.547739	1.84675	-1.74232	1.04385	1.99502	2.73426		0.67033	0.231768	0.294705		-0.000297751	1.52354	0.360847	1.62895	0.233188	2.42132
3.22176	3.64726	-0.324835	0.79053	-0.687792	0.656282	1.2682	2.55531		0.161459	0.843905	0.712791	-0.199855	0.613318	0.925291	2.65786		0.575325	0.533406	1.96084	-1.93059	0.854817	1.84398	2.76352		0.799201	0.262737	0.263736		0.00481643	1.5163	0.269796	1.54145	0.184113	2.33557
3.28452	3.57305	-0.37109	0.836901	-0.527631	0.535682	1.4515	2.57107		0.0494477	0.902868	0.452833	-0.316311	0.55352	1.03375	2.56548		0.51908	0.511449	1.87282	-1.86129	0.713249	1.75757	2.68089		0.997003	0.353646	0.280719		0.0345521	1.54028	0.20164	1.47238	0.149148	2.27276
3.34728	3.57436	-0.427671	0.76585	-0.298957	0.397438	1.59366	2.58376		0.00742226	0.9798	0.294178	-0.320817	0.566136	0.960755	2.5357		0.350251	0.510353	1.63855	-1.58595	0.737438	1.82728	2.54224		0.95005	0.45954	0.321678		0.058398	1.55924	0.204288	1.48439	0.0420881	2.2704
3.41004	3.56806	-0.500685	0.575272	-0.1161	0.345842	1.62872	2.53613		0.0334292	1.03876	0.256842	-0.260711	0.718699	0.750295	2.59116		0.160506	0.541114	1.45799	-1.26188	0.916954	2.02491	2.45101		0.877123	0.41958	0.37962		0.0132108	1.57811	0.260069	1.53879	0.0697837	2.30164
3.4728	3.48176	-0.563207	0.350525	0.000616667	0.376883	1.58734	2.41869		0.0675019	1.04608	0.276447	-0.222643	0.94751	0.562008	2.68806		0.0901537	0.587537	1.44302	-1.01661	1.12527	2.22002	2.47344		0.636364	0.284715	0.373626		-0.0648491	1.56057	0.316097	1.59777	0.164443	2.4098
3.53556	3.32825	-0.570902	0.231825	0.0899883	0.391997	1.5447	2.2778		0.0536053	0.992364	0.295173	-0.2559	1.11651	0.512547	2.74684		0.197019	0.623912	1.50332	-0.871671	1.25278	2.30101	2.58473		0.511489	0.175824	0.302697		-0.131143	1.52573	0.314212	1.5984	0.235528	2.52804
3.59833	3.18264	-0.494721	0.307748	0.170283	0.303821	1.54101	2.17891		-0.0153876	0.900085	0.31042	-0.336741	1.13818	0.575691	2.71827		0.394692	0.636845	1.47273	-0.775662	1.30378	2.27457	2.68992		0.571429	0.156843	0.214785		-0.155807	1.53156	0.263967	1.52776	0.278803	2.66154
3.66109	3.10073	-0.349184	0.520051	0.209084	0.12127	1.55486	2.16472		-0.106015	0.810357	0.340669	-0.397542	1.03951	0.634751	2.62443		0.522393	0.627687	1.31527	-0.681065	1.34904	2.24191	2.7019		0.769231	0.185814	0.172827		-0.149825	1.55201	0.194366	1.4497	0.26659	2.66651
3.72385	3.07714	-0.192952	0.683275	0.163733	-0.0661532	1.53973	2.23703		-0.180112	0.755333	0.372631	-0.387244	0.921639	0.613571	2.53681		0.482533	0.598824	1.16273	-0.578288	1.39889	2.28294	2.61113		0.957043	0.226773	0.167832		-0.0815311	1.61001	0.152104	1.412	0.235213	2.61488
3.78661	3.08145	-0.0957558	0.625165	0.0320983	-0.174126	1.47228	2.361		-0.213832	0.736256	0.367665	-0.310572	0.866182	0.540384	2.51309		0.317945	0.546725	1.14189	-0.474299	1.35779	2.37425	2.48793		0.96004	0.243756	0.166833		-0.0794224	1.57538	0.159661	1.40328	0.220701	2.53799
3.84937	3.11084	-0.0930313	0.330037	-0.145756	-0.184754	1.36671	2.47945		-0.190589	0.72709	0.319518	-0.220019	0.879006	0.490424	2.55154		0.161893	0.473057	1.20484	-0.36766	1.12746	2.42217	2.41711		0.786214	0.236763	0.231768		-0.136149	1.50099	0.212691	1.45553	0.158432	2.41219
3.91213	3.18272	-0.163469	-0.0481209	-0.326491	-0.132483	1.25775	2.53484		-0.0950525	0.703195	0.281929	-0.174492	0.909364	0.491445	2.60142		0.116273	0.397995	1.17583	-0.25592	0.748478	2.36404	2.42501		0.572428	0.227772	0.32967		-0.210877	1.43879	0.229114	1.48721	0.151988	2.25633
3.9749	3.27633	-0.248621	-0.315359	-0.489604	-0.0518323	1.18031	2.49869		0.0720418	0.668777	0.317504	-0.19875	0.906752	0.503952	2.61277		0.174276	0.352795	0.969752	-0.155656	0.412333	2.22444	2.46461		0.412587	0.236763	0.472527		-0.269247	1.39042	0.239041	1.47109	0.0586136	2.14558
4.03766	3.30874	-0.298217	-0.386606	-0.625476	0.0459224	1.15741	2.39256		0.274381	0.654022	0.419524	-0.270368	0.856434	0.48648	2.57574		0.249477	0.352692	0.724112	-0.10022	0.307432	2.07576	2.46755		0.352647	0.23976	0.571429		-0.317872	1.37213	0.223537	1.39786	-0.00994454	2.07672
4.10042	3.19868	-0.302115	-0.319925	-0.715466	0.150751	1.18739	2.27703		0.446864	0.681991	0.501808	-0.339287	0.773559	0.455007	2.51621		0.268247	0.37818	0.674172	-0.116406	0.444296	1.96341	2.40798		0.363636	0.237762	0.56044		-0.356423	1.33368	0.17718	1.38539	-0.090434	2.09373
4.16318	2.96284	-0.283131	-0.226024	-0.741241	0.229986	1.23139	2.208		0.533352	0.739094	0.479997	-0.364644	0.68036	0.461628	2.45971		0.233083	0.388703	0.896532	-0.208556	0.639508	1.88454	2.31618		0.431568	0.211788	0.482517		-0.355692	1.36451	0.128011	1.43144	-0.0612169	2.11675
4.22594	2.7344	-0.262857	-0.16468	-0.712742	0.243105	1.22274	2.19554		0.523756	0.782818	0.360813	-0.343704	0.595137	0.521882	2.40301		0.208227	0.359481	1.20865	-0.359843	0.683861	1.83093	2.23692		0.482517	0.185814	0.410589		-0.328647	1.31874	0.0727132	1.44068	0.00817292	2.10448
4.2887	2.66426	-0.23781	-0.132435	-0.670051	0.181502	1.11057	2.20427		0.455456	0.78169	0.240058	-0.312467	0.534524	0.582728	2.32066		0.256846	0.306336	1.34667	-0.532638	0.534944	1.82436	2.18557		0.537463	0.198801	0.391608		-0.312577	1.31443	0.0426836	1.38871	0.00745619	2.10166
4.35146	2.79102	-0.19004	-0.128785	-0.644844	0.084968	0.90806	2.19435		0.377635	0.745752	0.207838	-0.316297	0.512935	0.572133	2.19791		0.391593	0.274061	1.23355	-0.66279	0.347782	1.88856	2.15004		0.583417	0.224775	0.384615		-0.355419	1.30782	0.0210883	1.3358	-0.0247805	2.05263
4.41423	3.00569	-0.118183	-0.199258	-0.625143	0.0124634	0.694391	2.15985		0.311581	0.713696	0.261631	-0.371875	0.5335	0.473359	2.05681		0.570739	0.299505	1.04584	-0.677047	0.315534	1.99283	2.12698		0.617383	0.1998	0.300699		-0.357583	1.285	-0.00324811	1.26011	-0.0385235	2.02945
4.47699	3.14582	-0.0519308	-0.391236	-0.572946	-0.00358981	0.55503	2.12565		0.241199	0.709904	0.318771	-0.451239	0.582476	0.340306	1.94847		0.727471	0.382866	1.01007	-0.55265	0.476458	2.05039	2.13811		0.655345	0.132867	0.18981		-0.399805	1.26016	-0.0140975	1.25155	0.0281694	2.029
4.53975	3.1266	-0.0298822	-0.672082	-0.481063	0.0254537	0.510309	2.11185		0.13816	0.718873	0.31055	-0.503311	0.636982	0.241695	1.91467		0.805291	0.488911	1.15734	-0.37385	0.67274	1.99293	2.19975		0.66034	0.0819181	0.111888		-0.421473	1.26614	-0.0233233	1.2537	0.127687	2.14334
4.60251	2.98818	-0.0606232	-0.9143	-0.399252	0.0661042	0.502335	2.10997		-0.00380616	0.705761	0.253614	-0.497203	0.677754	0.201648	1.95081		0.784026	0.571054	1.30403	-0.304042	0.697567	1.8433	2.2833		0.635365	0.0559441	0.0949051		-0.465273	1.25969	-0.0412754	1.23698	0.17744	2.16803
4.66527	2.83098	-0.107535	-0.984666	-0.388019	0.0933391	0.456012	2.0968		-0.155771	0.659611	0.224827	-0.450726	0.69135	0.198947	2.00531		0.689392	0.596566	1.26878	-0.458732	0.487557	1.69622	2.32502		0.565435	0.0629371	0.126873		-0.476153	1.19903	-0.0720204	1.23844	0.119981	2.06369
4.72803	2.71967	-0.116434	-0.859327	-0.447034	0.0992627	0.354084	2.06412		-0.271688	0.609598	0.273963	-0.417427	0.662247	0.211227	2.02188		0.577509	0.559321	1.07729	-0.783462	0.179518	1.61796	2.28714		0.529471	0.108891	0.245754		-0.480207	1.13116	-0.0638504	1.22474	-0.0772361	1.9561
4.79079	2.64987	-0.0626636	-0.651748	-0.50652	0.0813315	0.250885	2.02529		-0.321974	0.595283	0.371989	-0.440403	0.573204	0.240409	1.99128		0.494675	0.480039	0.931759	-1.07113	-0.016853	1.57557	2.20402		0.577423	0.203796	0.345654		-0.484928	1.15033	-0.0911257	1.20845	-0.155116	1.85057
4.85356	2.58906	0.0259986	-0.52227	-0.503519	0.0344804	0.213208	1.9936		-0.314988	0.624661	0.44611	-0.511829	0.424694	0.289799	1.96327		0.438536	0.396641	0.990957	-1.13065	-0.00655009	1.48157	2.15299		0.686314	0.252747	0.354645		-0.476928	1.19894	-0.148626	1.17676	-0.241094	1.78358
4.91632	2.52652	0.0916184	-0.549784	-0.460175	-0.0401969	0.251658	1.96609		-0.28857	0.667683	0.45573	-0.57526	0.25565	0.33215	2.00021		0.359802	0.344918	1.20909	-0.957275	0.116541	1.30915	2.17327		0.743257	0.243756	0.28971		-0.466446	1.21535	-0.161139	1.19296	-0.209315	1.77848
4.97908	2.47512	0.0922331	-0.675929	-0.465824	-0.124005	0.312396	1.93773		-0.278496	0.691869	0.425213	-0.572348	0.134123	0.321604	2.10978		0.213515	0.335568	1.39895	-0.735609	0.170066	1.14432	2.22222		0.705295	0.197802	0.284715		-0.513216	1.20169	-0.17767	1.24158	-0.134937	1.80212
5.04184	2.43804	0.0306019	-0.760185	-0.570114	-0.186415	0.333174	1.92447		-0.291466	0.698664	0.404601	-0.495357	0.111978	0.243624	2.22285		0.015369	0.344351	1.42882	-0.667535	0.056341	1.10383	2.22312		0.58042	0.178821	0.372627		-0.576483	1.11535	-0.165451	1.25089	-0.157859	1.75872
5.1046	2.39514	-0.0554483	-0.68921	-0.705356	-0.207257	0.301965	1.95396		-0.307683	0.719725	0.408604	-0.39786	0.180045	0.141673	2.24754		-0.158084	0.328448	1.32955	-0.794475	-0.154682	1.20027	2.15431		0.475524	0.222777	0.559441		-0.620926	1.09711	-0.136712	1.31203	-0.26482	1.69204
5.16736	2.33173	-0.125189	-0.45197	-0.73737	-0.193512	0.259484	2.02267		-0.310251	0.779464	0.400688	-0.349752	0.270366	0.0802642	2.15612		-0.235382	0.259046	1.21418	-0.984486	-0.303411	1.30555	2.07694		0.476523	0.315684	0.723277		-0.60052	1.17398	-0.143813	1.32477	-0.337974	1.60439
5.23013	2.27245	-0.157727	-0.135302	-0.602998	-0.172912	0.24941	2.07258		-0.309782	0.867586	0.334327	-0.373397	0.310944	0.079129	2.02012		-0.220072	0.141014	1.13136	-1.07943	-0.297866	1.26589	2.06559		0.594406	0.461538	0.786214		-0.5453	1.22244	-0.149382	1.30037	-0.352573	1.58993
5.29289	2.27004	-0.150484	0.141336	-0.38521	-0.170337	0.272057	2.03339		-0.334582	0.950472	0.20457	-0.419928	0.284468	0.0916495	1.95153		-0.190518	0.00220559	1.03103	-1.03885	-0.199402	1.05532	2.12002		0.746254	0.624376	0.831169		-0.486978	1.24308	-0.177382	1.26857	-0.383635	1.57024
5.35565	2.35082	-0.105997	0.30021	-0.233951	-0.189709	0.286967	1.90117		-0.393286	1.00372	0.0596064	-0.4133	0.234749	0.053758	1.99932		-0.22547	-0.131222	0.865773	-0.942729	-0.160086	0.805632	2.16404		0.837163	0.809191	0.936064		-0.437378	1.26535	-0.171734	1.26051	-0.387921	1.51424
5.41841	2.47351	-0.0271225	0.343764	-0.21041	-0.216742	0.255751	1.76654		-0.451663	1.02677	-0.0340219	-0.32703	0.215988	-0.0494883	2.10101		-0.331292	-0.241142	0.683978	-0.880447	-0.276172	0.676678	2.1382		0.826174	0.985015	0.868132		-0.397769	1.26901	-0.160605	1.2741	-0.465058	1.44172
5.48117	2.55171	0.0759539	0.339099	-0.226045	-0.236341	0.178972	1.74342		-0.456582	1.02775	-0.0393989	-0.221614	0.238532	-0.171378	2.14085		-0.446517	-0.29918	0.589941	-0.864738	-0.496951	0.69937	2.07988		0.811189	0.846154	0.677323		-0.369717	1.28486	-0.144606	1.30303	-0.537489	1.30948
5.54393	2.52697	0.181285	0.361325	-0.151498	-0.245514	0.094053	1.85669		-0.389993	1.00476	0.0255436	-0.20002	0.26692	-0.254722	2.06147		-0.515352	-0.256898	0.617689	-0.853356	-0.671381	0.752747	2.09235		0.92008	0.745255	0.663337		-0.343391	1.36386	-0.164904	1.28683	-0.554258	1.29858
5.60669	2.42468	0.264779	0.434699	0.0186511	-0.249788	0.0428653	2.00519		-0.296778	0.951238	0.0989982	-0.314458	0.268108	-0.286842	1.92067		-0.546427	-0.0770011	0.67754	-0.825323	-0.685771	0.695224	2.23058		0.849151	0.715285	0.829171		-0.298348	1.47823	-0.212096	1.26213	-0.501998	1.34169
5.66946	2.33746	0.316481	0.516204	0.131801	-0.249509	0.0420769	2.04988		-0.250608	0.876749	0.113787	-0.509667	0.252561	-0.300592	1.83762		-0.59235	0.212242	0.651664	-0.808836	-0.56568	0.51179	2.43276		0.627373	0.75025	0.903097		-0.248105	1.51753	-0.270727	1.21697	-0.482502	1.4503
5.73222	2.3474	0.345376	0.537484	0.0271429	-0.23329	0.0782472	1.94607		-0.286642	0.810964	0.0415606	-0.660621	0.260301	-0.329636	1.88209		-0.678258	0.501614	0.536619	-0.837008	-0.45258	0.329628	2.57904		0.587413	0.837163	0.771229		-0.282268	1.48082	-0.337711	1.19772	-0.483622	1.56237
5.79498	2.45455	0.365761	0.471291	-0.279282	-0.188518	0.123429	1.7855		-0.369703	0.779367	-0.0854055	-0.675363	0.308367	-0.375187	2.01487		-0.766667	0.663153	0.466976	-0.899721	-0.479454	0.296247	2.61418		0.711289	0.962038	0.781219		-0.356305	1.42855	-0.351931	1.21654	-0.527494	1.58487
5.85774	2.57395	0.37878	0.361938	-0.573656	-0.119414	0.153995	1.70316		-0.433008	0.778387	-0.195039	-0.569545	0.363015	-0.418553	2.13263		-0.802162	0.64828	0.580425	-0.951069	-0.655131	0.450155	2.59536		0.871129	0.943057	0.829171		-0.41895	1.36681	-0.32014	1.24005	-0.479016	1.55451
5.9205	2.60349	0.368581	0.288657	-0.624774	-0.050794	0.161246	1.744		-0.447289	0.782762	-0.229236	-0.444409	0.374224	-0.453702	2.16612		-0.783065	0.528963	0.860086	-0.95094	-0.854499	0.705933	2.6119		0.928072	0.871129	0.8002		-0.440107	1.39354	-0.300355	1.26151	-0.453662	1.53762
5.98326	2.50551	0.31703	0.294338	-0.394797	-0.0061604	0.152761	1.82648		-0.445628	0.778524	-0.186857	-0.392485	0.337897	-0.4929	2.13336		-0.771822	0.433793	1.12086	-0.883887	-0.919698	0.947863	2.67208		0.837163	0.832168	0.652348		-0.399083	1.40514	-0.307271	1.26382	-0.370471	1.63461
6.04603	2.33547	0.221682	0.347164	-0.0735882	0.0230797	0.146987	1.83597		-0.476885	0.78002	-0.113625	-0.422826	0.314062	-0.539512	2.10358		-0.825663	0.435271	1.16192	-0.749126	-0.787204	1.12442	2.69053		0.73027	0.79021	0.56044		-0.361701	1.38744	-0.306055	1.2508	-0.357489	1.7594
6.10879	2.19567	0.100184	0.371081	0.0961843	0.0822422	0.163131	1.74503		-0.54023	0.806513	-0.0463082	-0.471948	0.372831	-0.569049	2.11997		-0.92475	0.498109	0.94193	-0.56582	-0.538586	1.25904	2.58961		0.766234	0.778222	0.564436		-0.276964	1.34278	-0.299908	1.26479	-0.360319	1.77546
6.17155	2.15319	-0.019944	0.314443	0.032422	0.214526	0.210484	1.63438		-0.576052	0.845966	0.0289207	-0.476905	0.519742	-0.55068	2.16334		-0.983988	0.536913	0.614836	-0.403488	-0.336782	1.39404	2.39244		0.963037	0.757243	0.708292		-0.367526	1.32763	-0.230901	1.30708	-0.399277	1.71436
6.23431	2.18879	-0.113772	0.193161	-0.134031	0.406937	0.284006	1.59974		-0.526916	0.855307	0.152683	-0.429156	0.68021	-0.487244	2.1862		-0.94244	0.516454	0.399388	-0.376268	-0.301249	1.54361	2.19501		0.831169	0.779221	0.937063		-0.420908	1.30953	-0.15891	1.35195	-0.353077	1.65507
6.29707	2.21775	-0.164868	0.0752664	-0.202365	0.577467	0.36967	1.65009		-0.403439	0.805099	0.324888	-0.360523	0.764474	-0.422384	2.17126		-0.834265	0.484275	0.404813	-0.553263	-0.422677	1.69559	2.051		0.752248	0.85015	0.924076		-0.417867	1.34412	-0.116173	1.40875	-0.384223	1.59204
6.35983	2.16389	-0.168294	0.029441	-0.0901038	0.631424	0.454481	1.70431		-0.281818	0.718339	0.474568	-0.292967	0.749763	-0.399336	2.14951		-0.761123	0.503423	0.560878	-0.851854	-0.583969	1.83411	1.91109		0.81019	0.942058	0.87013		-0.384614	1.39264	-0.099616	1.39815	-0.384758	1.60948
6.42259	2.02472	-0.136761	0.082025	0.108382	0.54575	0.531714	1.6819		-0.232138	0.652055	0.516871	-0.218699	0.696462	-0.415748	2.16335		-0.792563	0.566887	0.69744	-1.05384	-0.664718	1.94211	1.69557		0.868132	0.971029	0.837163		-0.343768	1.37078	-0.0956966	1.39928	-0.429386	1.57159
6.48536	1.87414	-0.104349	0.204139	0.22786	0.399862	0.597517	1.58534		-0.250392	0.635333	0.447193	-0.13004	0.682857	-0.428385	2.21916		-0.899729	0.596331	0.692103	-0.985337	-0.635109	1.98878	1.41596		0.856144	0.872128	0.731269		-0.329047	1.33955	-0.0798559	1.40868	-0.456187	1.5051
6.54812	1.80352	-0.114103	0.322666	0.184381	0.312777	0.644502	1.48992		-0.262946	0.634245	0.365604	-0.0512644	0.726982	-0.405271	2.2796		-0.991084	0.530942	0.560807	-0.706415	-0.556428	1.93855	1.19291		0.741259	0.768232	0.557443		-0.329756	1.30109	-0.0523069	1.41172	-0.453728	1.40488
6.61088	1.85362	-0.188034	0.348007	0.0330195	0.338745	0.660487	1.46088		-0.197125	0.590148	0.388103	-0.0221614	0.775536	-0.365796	2.29976		-1.00873	0.406586	0.426125	-0.495512	-0.494535	1.78913	1.13296		0.634366	0.733267	0.448551		-0.372455	1.24363	-0.0333316	1.41016	-0.44824	1.32848
6.67364	1.99356	-0.301709	0.220714	-0.101978	0.422548	0.634159	1.4905		-0.0474989	0.493246	0.527074	-0.0490951	0.767995	-0.36042	2.26654		-0.982049	0.331977	0.401684	-0.600944	-0.438844	1.59555	1.19709		0.573427	0.769231	0.416583		-0.448923	1.21247	-0.0530914	1.42913	-0.52181	1.26759
6.7364	2.15599	-0.391974	-0.0359548	-0.141311	0.460684	0.562731	1.51615		0.121667	0.405743	0.670282	-0.0898218	0.706174	-0.410515	2.20338		-0.986585	0.38166	0.49579	-0.990573	-0.315158	1.44009	1.21755		0.55045	0.87013	0.452547		-0.494906	1.17463	-0.0916466	1.37572	-0.555876	1.30293
6.79916	2.28797	-0.400696	-0.301555	-0.105039	0.405769	0.456345	1.49019		0.231495	0.400167	0.690944	-0.103446	0.656478	-0.476181	2.14156		-1.0591	0.518428	0.616222	-1.36621	-0.0824229	1.36876	1.06054		0.496503	0.968032	0.4995		-0.552497	1.12993	-0.0836885	1.37397	-0.5656	1.30772
6.86192	2.37146	-0.321019	-0.421433	-0.075261	0.304869	0.337329	1.42474		0.246296	0.476386	0.578391	-0.111973	0.68363	-0.490302	2.09199		-1.16026	0.626357	0.668342	-1.44881	0.192026	1.3612	0.766154		0.438561	0.998002	0.488511		-0.561654	1.0654	-0.141874	1.37885	-0.528311	1.27437
6.92469	2.40732	-0.204381	-0.322099	-0.116213	0.234297	0.233463	1.37133		0.190245	0.552429	0.449692	-0.190518	0.783913	-0.423805	2.04468		-1.21741	0.616427	0.652977	-1.24997	0.371223	1.36807	0.513866		0.436563	0.945055	0.421578		-0.535334	1.06829	-0.0878319	1.37324	-0.559658	1.21504
6.98745	2.39518	-0.119881	-0.084753	-0.222564	0.20868	0.164436	1.36631		0.123522	0.546761	0.42798	-0.37798	0.883725	-0.313104	1.99053		-1.19399	0.49387	0.666879	-1.04826	0.374807	1.37165	0.447261		0.487512	0.892108	0.425574		-0.484001	1.10122	-0.106345	1.36599	-0.529654	1.12182
7.05021	2.33816	-0.101938	0.104569	-0.328861	0.171015	0.126299	1.40019		0.105207	0.465952	0.518665	-0.601486	0.903366	-0.222866	1.9371		-1.11354	0.327546	0.799881	-1.09752	0.263176	1.39674	0.540198		0.598402	0.889111	0.496503		-0.459398	1.09543	-0.140471	1.32701	-0.542316	1.1759
7.11297	2.26343	-0.132411	0.103039	-0.362033	0.0757123	0.0877281	1.43495		0.16376	0.400293	0.616952	-0.713136	0.825825	-0.185985	1.89923		-1.02505	0.172273	1.02926	-1.37647	0.181376	1.45916	0.636807		0.609391	1	0.627373		-0.478236	1.03334	-0.187847	1.27011	-0.51022	1.23699
7.17573	2.22484	-0.168338	-0.0702191	-0.293751	-0.0362324	0.0106008	1.44368		0.281847	0.428572	0.633807	-0.623733	0.711013	-0.181985	1.87496		-0.957736	0.0371344	1.22414	-1.63577	0.20977	1.51975	0.610249		0.521479	0.883117	0.65035		-0.581622	0.991732	-0.173156	1.24422	-0.508558	1.2153
7.23849	2.2718	-0.182561	-0.256623	-0.157429	-0.0683319	-0.112767	1.43303		0.401497	0.533999	0.596305	-0.40302	0.648288	-0.168906	1.8356		-0.910354	-0.0757488	1.26601	-1.67335	0.275754	1.5116	0.46932		0.396603	0.872128	0.53047		-0.620883	0.963926	-0.131435	1.27495	-0.507944	1.14009
7.30126	2.40896	-0.176954	-0.302107	-0.022096	0.0184591	-0.23745	1.43276		0.456035	0.622462	0.610589	-0.233329	0.690277	-0.128521	1.74735		-0.870249	-0.128282	1.16716	-1.53301	0.226314	1.42001	0.316058		0.361638	0.954046	0.346653		-0.595565	1.04241	-0.058419	1.32853	-0.572725	1.08921
7.36402	2.58666	-0.162337	-0.184977	0.0556018	0.140136	-0.289043	1.46657		0.417147	0.62244	0.734162	-0.248719	0.818703	-0.0796869	1.60861		-0.82699	-0.0680825	1.06183	-1.42796	-0.00743566	1.32053	0.224145		0.454545	0.698302	0.256743		-0.539509	1.12817	-0.049733	1.35487	-0.615905	0.991568
7.42678	2.73404	-0.135754	-0.0100243	0.0658015	0.159772	-0.22505	1.52943		0.321094	0.557308	0.906987	-0.414524	0.962139	-0.0559439	1.46566		-0.767421	0.103013	1.07321	-1.50106	-0.326047	1.31569	0.177593		0.568432	0.543457	0.270729		-0.469388	1.24075	-0.109406	1.37627	-0.652379	1.00313
7.48954	2.8063	-0.0844833	0.110236	0.0420832	0.0310559	-0.0845135	1.58825		0.243427	0.513586	1.02046	-0.567347	1.04747	-0.0777965	1.38361		-0.67407	0.29968	1.19259	-1.69393	-0.550221	1.4245	0.118939		0.68032	0.561439	0.338661		-0.422576	1.26597	-0.169704	1.37951	-0.687908	1.10805
7.5523	2.80746	-0.0107339	0.155964	0.0270575	-0.139766	0.0260525	1.60737		0.236127	0.54439	1.04213	-0.574173	1.0471	-0.142965	1.39155		-0.545132	0.41283	1.2965	-1.8439	-0.590845	1.54338	0.0275518		0.691309	0.624376	0.380619		-0.40406	1.21246	-0.150543	1.3891	-0.671132	1.1676
7.61506	2.77719	0.0560664	0.183535	0.0388483	-0.191114	0.0104895	1.58222		0.283087	0.615819	1.04906	-0.450268	0.989624	-0.229909	1.45205		-0.416066	0.406101	1.2805	-1.86532	-0.520788	1.53057	-0.0683467		0.641359	0.602398	0.356643		-0.395084	1.17049	-0.103111	1.39554	-0.664244	1.14984
7.67782	2.76098	0.0792008	0.227617	0.0661417	-0.0695784	-0.137712	1.55273		0.318215	0.651283	1.12961	-0.323837	0.928185	-0.301708	1.48955		-0.34587	0.348053	1.16218	-1.80435	-0.474815	1.33628	-0.144494		0.621379	0.486513	0.261738		-0.401121	1.14143	-0.0601696	1.42438	-0.699614	1.07193
7.74059	2.78644	0.048308	0.242487	0.0893372	0.109644	-0.326976	1.57606		0.289502	0.618421	1.26788	-0.296072	0.892692	-0.313966	1.45684		-0.367002	0.343087	1.04469	-1.7375	-0.491098	1.0485	-0.21598		0.648352	0.351648	0.203796		-0.328658	1.13827	-0.0515529	1.46344	-0.744133	1.02319
7.80335	2.8517	-0.0102991	0.150209	0.10093	0.169531	-0.443121	1.67299		0.205078	0.560243	1.34832	-0.346136	0.868274	-0.238672	1.3773		-0.447991	0.431047	0.991661	-1.67152	-0.470361	0.811116	-0.306517		0.692308	0.284715	0.187812		-0.352946	1.15802	-0.0785118	1.43096	-0.819891	1.03803
7.86611	2.92243	-0.0597393	-0.0615497	0.10544	0.0354335	-0.44498	1.7961		0.117052	0.540553	1.28204	-0.370449	0.821711	-0.0952296	1.31876		-0.51634	0.556679	0.963604	-1.57105	-0.29702	0.701318	-0.3981		0.686314	0.357642	0.20979		-0.429835	1.13734	-0.120955	1.38545	-0.871276	1.03342
7.92887	2.9424	-0.0880147	-0.30399	0.107499	-0.207189	-0.395665	1.85987		0.0653624	0.570807	1.11532	-0.299344	0.751083	0.04455	1.3225		-0.527466	0.632878	0.889647	-1.45366	0.0138079	0.686986	-0.436973		0.564436	0.527473	0.251748		-0.483789	1.14563	-0.103091	1.37808	-0.856692	1.07177
7.99163	2.86569	-0.115005	-0.454303	0.110345	-0.405788	-0.40238	1.81595		0.0435413	0.601363	0.996361	-0.162272	0.704043	0.0982414	1.36035		-0.509735	0.624253	0.784182	-1.39978	0.309314	0.689907	-0.397135		0.424575	0.718282	0.260739		-0.531822	1.1005	-0.0930716	1.38267	-0.791426	1.08938
8.05439	2.69858	-0.164774	-0.454734	0.128211	-0.473159	-0.520035	1.70352		0.0183753	0.582153	1.03016	-0.0432725	0.735506	0.034912	1.36654		-0.534268	0.565647	0.75924	-1.44503	0.444678	0.669485	-0.321161		0.294705	0.851149	0.247752		-0.584637	1.02851	-0.0714579	1.39465	-0.759415	1.09077
8.11715	2.51434	-0.235464	-0.345834	0.189371	-0.425608	-0.704059	1.61781		-0.0267841	0.51989	1.17361	0.00903048	0.840764	-0.0991437	1.31214		-0.637096	0.509223	0.902632	-1.49292	0.427167	0.636511	-0.278526		0.244755	0.904096	0.235764		-0.577463	0.958421	-0.0495033	1.40429	-0.76663	1.04364
8.17992	2.41217	-0.300812	-0.213945	0.310374	-0.31513	-0.849985	1.62048		-0.0772391	0.468404	1.27984	0.015007	0.937665	-0.219171	1.24055		-0.775085	0.469596	1.15443	-1.37975	0.405531	0.60261	-0.283825		0.272727	0.879121	0.253746		-0.563304	0.976842	-0.0420663	1.41639	-0.769178	1.06439
8.24268	2.44064	-0.340155	-0.119877	0.459239	-0.16005	-0.879654	1.68192		-0.112496	0.468467	1.24389	0.0167237	0.930784	-0.269818	1.22198		-0.863573	0.427283	1.32991	-1.03967	0.515718	0.547506	-0.27471		0.372627	0.823177	0.306693		-0.519296	1.06308	-0.0633527	1.42974	-0.753822	1.06894
8.30544	2.55036	-0.360433	-0.0775758	0.55325	0.0412901	-0.798566	1.71964		-0.133626	0.508168	1.10122	0.0185818	0.802887	-0.257069	1.27383		-0.857162	0.376152	1.28127	-0.585037	0.741677	0.45303	-0.184641		0.533467	0.776224	0.394605		-0.478471	1.11485	-0.104617	1.40337	-0.672023	1.10748
8.3682	2.62642	-0.38307	-0.0809531	0.513872	0.24762	-0.682484	1.69612		-0.155101	0.545019	0.986824	-0.0117083	0.638096	-0.21887	1.33472		-0.789887	0.350855	1.03557	-0.20693	0.928132	0.356421	-0.0305255		0.665335	0.775225	0.486513		-0.459821	1.15104	-0.108993	1.35299	-0.625895	1.10778
8.43096	2.58036	-0.410849	-0.12589	0.341062	0.362372	-0.615149	1.6693		-0.172403	0.557493	1.00506	-0.0891024	0.542776	-0.175228	1.32306		-0.736013	0.398547	0.766914	-0.00777982	0.924879	0.339527	0.0909077		0.67033	0.818182	0.54046		-0.474832	1.14229	-0.167217	1.34215	-0.572877	1.12895
8.49372	2.42191	-0.416226	-0.198417	0.134646	0.306645	-0.633098	1.73356		-0.150406	0.564048	1.13912	-0.174608	0.539259	-0.116769	1.21725		-0.737161	0.526134	0.63355	0.0512308	0.719772	0.445096	0.10331		0.616384	0.909091	0.557443		-0.535146	1.06662	-0.183483	1.33339	-0.586495	1.14868
8.55649	2.24542	-0.370328	-0.257534	0.027683	0.100863	-0.715123	1.90794		-0.0534733	0.591762	1.27534	-0.202351	0.545722	-0.0406832	1.07002		-0.772576	0.681453	0.646561	0.054043	0.445681	0.609266	0.0381272		0.549451	0.979021	0.537463		-0.557629	1.03032	-0.172851	1.3719	-0.598187	1.11539
8.61925	2.14537	-0.283651	-0.253492	0.0790818	-0.139986	-0.810782	2.09371		0.113819	0.637123	1.30405	-0.140693	0.470656	0.01638	0.9441		-0.796617	0.788236	0.692237	0.0297754	0.274758	0.698424	0.00688019		0.557443	0.959041	0.541459		-0.545119	1.06218	-0.192139	1.3629	-0.657614	1.10421
8.68201	2.14158	-0.209923	-0.174539	0.219982	-0.295497	-0.876804	2.15701		0.301983	0.667048	1.20064	-0.021079	0.325248	-0.00264125	0.846624		-0.793771	0.799633	0.665218	-0.0228547	0.302209	0.629109	0.0822588		0.637363	0.926074	0.582418		-0.502752	1.08169	-0.223739	1.30841	-0.618849	1.11425
8.74477	2.18098	-0.199708	-0.0703768	0.307812	-0.318052	-0.896966	2.05903		0.454199	0.657085	1.02793	0.0919447	0.228863	-0.11727	0.738662		-0.788743	0.72344	0.566765	-0.0441879	0.501112	0.452043	0.216226		0.714286	0.898102	0.658342		-0.461229	1.08597	-0.259978	1.2412	-0.590274	1.11674
8.80753	2.20559	-0.245874	-0.0185179	0.245901	-0.22754	-0.881654	1.89978		0.545175	0.620507	0.876329	0.152783	0.291648	-0.2762	0.604465		-0.806397	0.607433	0.480957	0.0805415	0.752992	0.310082	0.285977		0.733267	0.951049	0.719281		-0.499316	1.0453	-0.288801	1.18688	-0.569939	1.12553
8.87029	2.21396	-0.278658	-0.061304	0.0651991	-0.0556767	-0.8551	1.82661		0.58268	0.596124	0.798651	0.157504	0.492818	-0.39129	0.490342		-0.83397	0.508461	0.477819	0.379171	0.914395	0.309522	0.219506		0.677323	0.976024	0.715285		-0.531827	1.038	-0.269568	1.18934	-0.573226	1.1235
8.93305	2.25647	-0.222883	-0.174206	-0.102505	0.173765	-0.837891	1.89759		0.57969	0.612277	0.784107	0.127139	0.685906	-0.410448	0.457898		-0.831189	0.46925	0.553202	0.682648	0.887179	0.434112	0.0662489		0.676324	0.985015	0.665335		-0.50609	1.08745	-0.254565	1.24284	-0.594893	1.14021
8.99582	2.37407	-0.067342	-0.292697	-0.133699	0.407924	-0.831434	2.036		0.537247	0.668085	0.77984	0.0825569	0.732748	-0.358537	0.503349		-0.775382	0.505639	0.652405	0.727332	0.673641	0.582812	-0.0602152		0.823177	0.817183	0.627373		-0.450808	1.19191	-0.237653	1.28982	-0.571646	1.17194
9.05858	2.54379	0.119137	-0.365767	-0.0080948	0.545546	-0.81403	2.11659		0.457853	0.746212	0.738267	0.0374697	0.63182	-0.307823	0.545373		-0.688888	0.598743	0.729978	0.41424	0.389256	0.680192	-0.101077		0.962038	0.603397	0.632368		-0.406607	1.30632	-0.222538	1.30859	-0.615421	1.19901
9.12134	2.68341	0.24139	-0.384986	0.188322	0.502394	-0.75593	2.09087		0.365686	0.832629	0.654314	0.00342176	0.510881	-0.310147	0.510005		-0.619117	0.697926	0.778315	-0.0467601	0.206515	0.737929	-0.103278		0.783217	0.483516	0.678322		-0.366053	1.37262	-0.285328	1.29099	-0.694296	1.24494
9.1841	2.71052	0.25238	-0.372787	0.344624	0.313532	-0.646121	2.02619		0.300339	0.917178	0.563009	-0.0126163	0.495132	-0.356235	0.422457		-0.596377	0.745338	0.813082	-0.298475	0.247178	0.810473	-0.152186		0.749251	0.513487	0.749251		-0.341943	1.37318	-0.318967	1.30936	-0.695085	1.28552
9.24686	2.60483	0.182264	-0.35505	0.413004	0.145346	-0.508156	2.02998		0.286946	0.98191	0.49893	-0.0175718	0.588788	-0.393209	0.394054		-0.616181	0.713943	0.850897	-0.171333	0.497284	0.909425	-0.265895		0.825175	0.597403	0.787213		-0.326652	1.34099	-0.322932	1.34595	-0.649442	1.2952
9.30962	2.42473	0.101689	-0.34627	0.430999	0.164485	-0.38657	2.14626		0.319166	1.00452	0.457504	-0.0293799	0.686396	-0.373007	0.504072		-0.659577	0.628411	0.902698	0.149561	0.818654	0.981624	-0.369346		0.862138	0.647353	0.793207		-0.28589	1.35345	-0.316297	1.35317	-0.606289	1.27912
9.37238	2.26905	0.0596233	-0.349434	0.471263	0.374739	-0.312096	2.3269		0.37689	0.982447	0.403508	-0.0562344	0.689566	-0.284	0.700458		-0.720663	0.545392	0.970886	0.309335	1.05254	0.974225	-0.375278		0.79021	0.59041	0.785215		-0.216883	1.46507	-0.283169	1.35499	-0.566892	1.3275
9.43515	2.21463	0.0523436	-0.358096	0.572671	0.596254	-0.277879	2.49046		0.455286	0.947965	0.3243	-0.0811501	0.600365	-0.147272	0.834733		-0.807636	0.506958	1.03771	0.135784	1.12738	0.904814	-0.281987		0.64036	0.458541	0.778222		-0.151772	1.58701	-0.271026	1.3465	-0.558777	1.28504
9.49791	2.27396	0.0422434	-0.359246	0.710356	0.629459	-0.2515	2.59289		0.565247	0.945643	0.266413	-0.0765839	0.501858	0.00435507	0.804764		-0.921156	0.509328	1.06229	-0.20319	1.08267	0.848258	-0.18175		0.543457	0.360639	0.751249		-0.100997	1.64129	-0.27943	1.32616	-0.601623	1.243
9.56067	2.40023	-0.00247512	-0.345539	0.818489	0.447122	-0.211505	2.63908		0.702286	0.987272	0.297864	-0.0390449	0.464426	0.141553	0.65784		-1.04214	0.514656	1.00892	-0.389805	1.00671	0.851106	-0.171537		0.55045	0.304695	0.677323		-0.0911144	1.6052	-0.270625	1.29855	-0.693905	1.23488
9.62343	2.53385	-0.0859307	-0.33129	0.836875	0.214525	-0.169686	2.64249		0.826121	1.03355	0.42012	-0.00368379	0.487326	0.244845	0.543212		-1.14588	0.490193	0.889185	-0.280342	0.96378	0.87337	-0.260751		0.674326	0.272727	0.543457		-0.103491	1.53371	-0.257348	1.35301	-0.77731	1.18324
9.68619	2.6538	-0.190038	-0.348081	0.746064	0.113295	-0.154421	2.59611		0.886073	1.03003	0.529321	-0.015267	0.528335	0.309938	0.562038		-1.22315	0.434035	0.767335	-0.024412	0.975333	0.831712	-0.370393		0.853147	0.276723	0.42957		-0.133013	1.4527	-0.165895	1.38375	-0.782379	1.10729
9.74895	2.79088	-0.288449	-0.409438	0.577019	0.156329	-0.174055	2.49186		0.870973	0.964793	0.495456	-0.0811845	0.567926	0.350216	0.671162		-1.27989	0.366018	0.707382	0.120365	1.04366	0.703146	-0.419424		0.971029	0.313686	0.378621		-0.214871	1.38082	-0.131102	1.37252	-0.77729	1.07251
9.81172	2.98832	-0.353077	-0.475943	0.399377	0.194121	-0.204075	2.35697		0.824721	0.8857	0.300311	-0.157377	0.624202	0.386634	0.737513		-1.31714	0.301776	0.709734	0.0551986	1.16191	0.572881	-0.404483		0.957043	0.381618	0.387612		-0.289061	1.39014	-0.157821	1.34683	-0.810179	1.06342
9.87448	3.24306	-0.359252	-0.470006	0.293368	0.104038	-0.215664	2.25174		0.801665	0.854276	0.0862712	-0.186567	0.707175	0.427981	0.6795		-1.32187	0.241883	0.70908	-0.0916611	1.29157	0.5623	-0.391209		0.924076	0.435564	0.40959		-0.321968	1.43643	-0.172808	1.31807	-0.859171	1.05408
9.93724	3.48507	-0.301167	-0.346696	0.309523	-0.050665	-0.212385	2.21977		0.806413	0.882867	0.0374506	-0.152586	0.780323	0.46239	0.545531		-1.28613	0.183998	0.644388	-0.133056	1.35175	0.701956	-0.431879		0.918082	0.44955	0.420579		-0.328087	1.47841	-0.188145	1.3279	-0.877578	1.05195
10	3.6228	-0.208347	-0.159015	0.432825	-0.0766424	-0.226314	2.24324		0.786879	0.922654	0.192316	-0.0966159	0.786529	0.473994	0.45538		-1.23156	0.136256	0.529554	-0.0162311	1.26504	0.881977	-0.501353		0.973027	0.336663	0.36963		-0.260067	1.54754	-0.197829	1.30645	-0.859993	1.05744
