# Supplementary material for: Role of anterior insula cortex in context-induced relapse of nicotine-seeking
Source: eLife. 2022 May 10;11:e75609. doi: 10.7554/eLife.75609 (PMC9119676; doi:10.7554/eLife.75609)
Supplement: Figure 3—source data 1. [file elife-75609-fig3-data1.xlsx]

## Sheet: 3C
recording	channel	baseline	clozapine	deltaV
1	0	-64.1624	-67.4306	-3.26819
2	3	-69.0321	-70.4261	-1.39394
3	0	-72.3909	-74.5591	-2.16824
4	3	-71.3351	-75.2732	-3.9381
5	0	-59.9161	-63.1247	-3.20858
6	3	-72.7589	-75.5985	-2.83961
			average	-2.80278
			sem	0.367834
			ttest	0.000618925
