# Supplementary material for: Role of anterior insula cortex in context-induced relapse of nicotine-seeking
Source: eLife. 2022 May 10;11:e75609. doi: 10.7554/eLife.75609 (PMC9119676; doi:10.7554/eLife.75609)
Supplement: Figure 4—figure supplement 1—source data 1. [file elife-75609-fig4-figsupp1-data1.xlsx]

## Sheet: Fig. 4 Suppl 1
TEST (Exp. 4 - AI punishment group)
Experiment	Rat	Group	SEX	Act_Lat_PUN	INACT_LAT_PUN	Act_Lat_NIC	Inact_Lat_NIC
Nic_10	7	1	1	8	279	67	20
Nic_10	8	1	1	16	39	67	63
Nic_10	9	1	1	3600	41	28	2
Nic_10	10	1	1	104	3600	29	185
Nic_17	2	1	1	3591	104	48	121
Nic_17	18	1	1	131	168	17	25
Nic_10	3	2	1	450	319	53	90
Nic_10	4	2	1	3600	497	4	10
Nic_10	5	2	1	38	379	145	32
Nic_10	6	2	1	241	45	107	5
Nic_17	8	2	1	61	104	2	5
Nic_17	10	2	1	172	160	42	40
Nic_17	17	2	1	2072	62	74	5
Nic_10	13	1	2	248	52	1	11
Nic_10	14	1	2	189	50	14	39
Nic_10	16	1	2	78	11	17	3
Nic_10	17	1	2	3600	5	33	81
Nic_10	18	1	2	138	38	99	30
Nic_17	19	1	2	18	185	97	495
Nic_17	20	1	2	350	217	54	45
Nic_17	23	1	2	7	246	1	124
Nic_17	24	1	2	42	68	80	345
Nic_10	19	2	2	1769	49	44	7
Nic_10	21	2	2	3600	50	296	25
Nic_10	22	2	2	3600	66	18	132
Nic_10	24	2	2	3600	189	14	69
Nic_17	29	2	2	1486	38	27	31
Nic_17	36	2	2	17	21	5	95
		(1=GFP; 2=hM4Di)	(1=Male; 2=Female)
