# Supplementary material for: Role of anterior insula cortex in context-induced relapse of nicotine-seeking
Source: eLife. 2022 May 10;11:e75609. doi: 10.7554/eLife.75609 (PMC9119676; doi:10.7554/eLife.75609)
Supplement: Figure 4—source data 1. [file elife-75609-fig4-data1.xlsx]

## Sheet: 4B
Self-administration (Exp. 4 - AI punishment group)
Experiment	Rat	Group	SEX	inf_1	inf_2	inf_3	inf_4	inf_5	inf_6	inf_7	inf_8	inf_9	inf_10	inf_11	inf_12	inf_13	act_1	act_2	act_3	act_4	act_5	act_6	act_7	act_8	act_9	act_10	act_11	act_12	act_13	inact_1	inact_2	inact_3	inact_4	inact_5	inact_6	inact_7	inact_8	inact_9	inact_10	inact_11	inact_12	inact_13
Nic_10	7	1	1	6	2	2	5	0	3	3	2	4	3	2	2	7	9	2	4	5	0	6	8	6	15	10	16	7	28	8	3	1	1	2	3	0	1	17	8	10	5	6
Nic_10	8	1	1	8	2	2	6	1	4	3	1	2	1	0	1	1	11	4	2	7	3	9	6	3	8	4	0	3	3	6	7	12	15	2	12	2	8	5	2	2	1	1
Nic_10	9	1	1	6	5	3	7	0	6	5	7	5	1	3	2	1	10	12	7	9	0	22	32	29	24	4	12	13	4	13	16	8	19	2	15	20	24	9	5	9	10	1
Nic_10	10	1	1	11	2	4	6	6	18	13	25	19	25	8	14	15.6667	20	3	8	8	14	46	34	55	63	80	27	48	51.6667	5	5	10	23	8	9	5	13	7	5	8	18	10.3333
Nic_17	2	1	1	5	7	6	7	3	6	1	3	2	5	4	11	1	12	9	9	10	7	17	3	15	7	18	14	38	5	5	8	3	6	10	13	14	11	8	22	12	16	5
Nic_17	18	1	1	6	15	16	9	20	7	17	18	17	23	22	21	21	9	16	22	12	24	16	50	54	64	84	80	79	67	21	22	14	8	9	9	12	11	18	19	20	25	27
Nic_10	3	2	1	2	3	3	4	2	3	4	2	9	1	0	0	3	2	4	4	4	6	6	10	4	33	3	0	0	14	5	6	6	5	2	2	5	6	14	2	0	0	9
Nic_10	4	2	1	10	7	5	11	18	12	17	8	19	9	19	11	12	21	11	8	23	56	31	44	22	70	34	70	41	43	3	10	7	8	5	3	5	5	8	1	4	3	6
Nic_10	5	2	1	6	4	1	3	0	4	3	0	0	0	0	0	1	8	11	2	3	1	8	7	0	0	0	0	0	4	4	15	6	1	6	11	5	3	2	2	0	1	0
Nic_10	6	2	1	23	8	8	6	1	7	6	3	7	3	0	9	6	36	6	14	8	3	15	14	9	26	12	0	38	23	18	6	3	7	6	19	18	3	20	6	0	14	11
Nic_17	8	2	1	0	6	14	15	17	7	4	6	3	3	3	6	4	0	10	15	17	25	15	11	17	11	9	11	19	17	11	8	18	13	9	5	5	6	2	3	2	9	5
Nic_17	10	2	1	6	4	3	10	14	9.5	5	6	9	17	19	11	4	11	11	4	18	16	0	15	14	34	60	64	44	19	14	6	5	7	11	1	8	6	14	25	24	6	12
Nic_17	17	2	1	10	7	8	4	15	9	3	6	6	4	2	6	7	17	8	11	7	18	7	7	13	21	14	7	24	24	0	11	0	0	0	0	10	13	8	5	3	29	18
Nic_10	13	1	2	9	9	23	22	22	7	22	20	25	19	19	15	16	13	10	39	40	58	22	68	72	115	96	96	100	82	33	32	38	11	31	51	27	30	38	21	34	30	26
Nic_10	14	1	2	7	7	11	8	3	10	9	2	9	9	13	11	11	8	10	16	14	7	29	30	8	42	38	58	52	49	32	9	10	17	10	41	33	11	51	30	66	25	26
Nic_10	16	1	2	6	8	15	10	2	12	7	8	11	4	16	12	12	7	18	22	11	5	27	17	18	39	17	58	47	45	12	7	10	12	4	6	8	7	17	14	19	21	13
Nic_10	17	1	2	6	6	7	5	2	5	11	11	11	9	15	16	18	11	12	9	9	5	15	32	26	43	31	56	56	62	29	8	6	8	6	15	15	13	13	11	14	14	17
Nic_10	18	1	2	17	8	13	19	12	16	15	16	12	11	5	14	12	22	12	16	23	28	39	32	43	44	43	24	51	44	22	14	16	20	21	24	47	39	22	20	19	48	37
Nic_17	19	1	2	20	11	14	18	10	24	32	22	11	19	20	20	14	21	12	24	22	10	53	70	55	37	63	63	69	45	15	6	13	6	2	6	3	4	5	4	6	2	11
Nic_17	20	1	2	23	27	27	38	39	23	36	34	18	13	5	26	15	35	38	31	45	55	53	88	82	75	49	16	100	60	17	7	13	10	9	8	35	13	30	18	14	19	13
Nic_17	23	1	2	18	19	16	20	28	16	32	28	16	14	24	26	17	23	20	19	23	34	39	69	56	50	46	74	80	54	13	23	17	15	22	16	33	25	18	4	18	19	19
Nic_17	24	1	2	16	27	21	14	16	5	10	9	10	14	9	8	6	18	28	24	15	18	10	23	20	32	42	34	24	20	14	18	12	12	11	16	22	16	7	19	10	15	26
Nic_10	19	2	2	15	1	6	15	15	8	19	23	20	26	24	24	25	16	1	7	24	37	32	46	58	68	103	83	85	84	31	15	16	21	54	18	61	52	35	34	27	31	34
Nic_10	21	2	2	6	10	1	14	7	11	14	20	16	6	13	17	14	10	14	4	25	25	34	42	62	67	29	52	72	67	39	17	16	11	10	33	13	53	30	15	15	38	34
Nic_10	22	2	2	2	4	7	8	3	5	6	14	11	9	4	10	11	3	12	19	10	10	11	16	40	40	40	19	48	46	11	8	4	6	3	8	15	30	11	20	7	25	14
Nic_10	24	2	2	9	3	3	0	1	4	3	6	10	13	9	12	10	15	9	1	11	2	10	10	13	40	51	39	44	36	10	5	3	11	9	6	8	13	21	25	18	57	40
Nic_17	29	2	2	13	17	24	8	28	16	4	6	2	5	12	7	9	15	23	32	13	36	4	13	15	9	16	46	29	34	27	21	27	14	10	5	9	8	0	3	13	8	7
Nic_17	36	2	2	6	20	8	2	37	13	19	29	25	15	9	29	37	7	33	12	2	59	30	45	71	87	55	29	110	133	7	21	10	4	5	11	11	25	19	23	15	33	14
		(1=GFP; 2=hM4Di)	(1=Male; 2=Female)

## Sheet: 4C
Punishment (Exp. 4 - AI punishment group)
Experiment	Rat	Group	SEX	inf_1	inf_2	inf_3	inf_4	inf_5	inf_6	act_1	act_2	act_3	act_4	act_5	act_6	inact_1	inact_2	inact_3	inact_4	inact_5	inact_6
Nic_10	7	1	1	0	1	0	2	1	1	1	3	2	11	4	4	2	4	4	6	11	3
Nic_10	8	1	1	0	0	0	0	1	2	1	0	2	2	3	7	1	3	7	4	7	15
Nic_10	9	1	1	4	1	1	1	0	1	19	5	3	3	0	3	10	31	0	8	18	43
Nic_10	10	1	1	0	5	2	3	2	1	0	18	10	17	8	4	0	6	2	5	1	1
Nic_17	2	1	1	4	4	2	1	0	0	16	14	6	3	2	2	42	28	5	15	10	33
Nic_17	18	1	1	10	7	3	5	4	5	33	24	12	16	13	20	23	10	7	28	26	37
Nic_10	3	2	1	2	3	2	1	1	0	7	9	6	3	3	0	8	10	17	13	5	14
Nic_10	4	2	1	2	2	1	1	1	0	6	7	3	3	3	0	3	1	14	4	7	10
Nic_10	5	2	1	0	0	0	2	0	1	2	2	1	6	1	5	7	1	2	5	2	1
Nic_10	6	2	1	3	1	0	1	0	0	12	3	0	3	1	0	6	0	29	12	21	22
Nic_17	8	2	1	7	2	1	2	1	0	22	6	4	11	3	0	16	9	10	10	9	1
Nic_17	10	2	1	2	2	2	1	2	0	7	6	7	4	6	0	22	6	6	5	9	11
Nic_17	17	2	1	4	1	1	0	0	2	13	3	3	2	1	6	10	12	23	27	23	11
Nic_10	13	1	2	4	2	2	6	3	1	19	6	6	23	9	4	40	4	21	66	124	43
Nic_10	14	1	2	8	3	1	2	10	3	25	11	3	7	37	9	49	74	57	119	90	65
Nic_10	16	1	2	3	9	2	1	2	0	11	37	7	3	10	0	7	10	7	9	26	0
Nic_10	17	1	2	7	1	2	1	1	0	30	3	6	3	3	0	23	3	30	21	54	30
Nic_10	18	1	2	2	1	3	0	1	1	8	5	10	0	3	4	7	4	13	14	6	4
Nic_17	19	1	2	8	2	4	5	3	2	31	9	12	20	11	15	8	5	8	8	10	2
Nic_17	20	1	2	12	6	5	4	3	0	58	29	17	20	9	2	29	30	31	25	39	17
Nic_17	23	1	2	10	5	6	4	1	2	35	17	20	18	4	6	9	7	11	6	10	7
Nic_17	24	1	2	7	4	3	2	2	2	25	17	12	7	8	9	19	30	8	11	8	6
Nic_10	19	2	2	1	3	4	4	0	1	4	18	17	14	0	3	7	23	57	89	63	81
Nic_10	21	2	2	0	3	1	0	0	1	2	12	3	0	0	3	5	44	6	24	62	37
Nic_10	22	2	2	9	2	3	1	0	0	28	7	9	4	0	0	13	21	14	28	0	0
Nic_10	24	2	2	2	0	0	1	0	0	6	0	0	3	0	0	8	1	8	13	13	1
Nic_17	29	2	2	5	3	2	4	1	0	20	13	10	15	3	2	13	8	1	12	5	5
Nic_17	36	2	2	11	7	11	2	5	5	42	31	40	8	17	17	45	65	59	15	27	31
		(1=GFP; 2=hM4Di)	(1=Male; 2=Female)

## Sheet: 4D
TEST (Exp. 4 - AI punishment group)
Experiment	Rat	Group	SEX	PUN_Inactive	PUN_Active	NIC_Inactive	NIC_Active
Nic_10	7	1	1	10	15	5	23
Nic_10	8	1	1	15	5	18	19
Nic_10	9	1	1	24	0	34	29
Nic_10	10	1	1	0	9	5	24
Nic_17	2	1	1	22	2	11	57
Nic_17	18	1	1	17	55	25	79
Nic_10	3	2	1	22	9	17	42
Nic_10	4	2	1	8	0	9	12
Nic_10	5	2	1	3	6	6	4
Nic_10	6	2	1	7	4	21	8
Nic_17	8	2	1	2	1	11	15
Nic_17	10	2	1	10	17	6	12
Nic_17	17	2	1	39	7	29	19
Nic_10	13	1	2	30	23	40	137
Nic_10	14	1	2	28	72	28	75
Nic_10	16	1	2	18	9	12	31
Nic_10	17	1	2	7	0	12	48
Nic_10	18	1	2	9	8	28	64
Nic_17	19	1	2	32	43	8	50
Nic_17	20	1	2	10	34	10	87
Nic_17	23	1	2	2	13	18	89
Nic_17	24	1	2	24	18	18	86
Nic_10	19	2	2	48	3	49	12
Nic_10	21	2	2	15	0	37	22
Nic_10	22	2	2	4	2	10	22
Nic_10	24	2	2	3	0	2	5
Nic_17	29	2	2	5	6	7	25
Nic_17	36	2	2	26	70	28	23
		(1=GFP; 2=hM4Di)	(1=Male; 2=Female)
