# Supplementary material for: Role of anterior insula cortex in context-induced relapse of nicotine-seeking
Source: eLife. 2022 May 10;11:e75609. doi: 10.7554/eLife.75609 (PMC9119676; doi:10.7554/eLife.75609)
Supplement: Figure 5—figure supplement 1—source data 1. [file elife-75609-fig5-figsupp1-data1.xlsx]

## Sheet: Fig. 5 Suppl 1
Test (Exp. 5 - AI extinction group)
Experiment	Rat	Group	SEX	Act_Lat_EXT	INACT_LAT_EXT	Act_Lat_NIC	Inact_Lat_NIC
Nic_11	7	1	1	7	1	100	140
Nic_11	8	1	1	27	39	92	16
Nic_11	9	1	1	31	164	5	89
Nic_11	10	1	1	2	141	49	4
Nic_11	11	1	1	37	34	42	8
Nic_11	12	1	1	2	4	12	5
Nic_17	3	1	1	10	36	25	71
Nic_11	1	2	1	12	22	18	22
Nic_11	2	2	1	11	35	44	108
Nic_11	4	2	1	3600	19	12	62
Nic_11	5	2	1	1	50	24	16
Nic_11	6	2	1	155	68	1	75
Nic_17	12	2	1	78	2425	9	1
Nic_11	19	1	2	17	3600	34	76
Nic_11	20	1	2	22	367	58	25
Nic_11	21	1	2	27	22	33	2
Nic_11	22	1	2	12	1	11	35
Nic_11	23	1	2	332	45	186	8
Nic_11	24	1	2	6	23	1	16
Nic_17	22	1	2	89	38	123	88
Nic_17	25	1	2	66	1	52	90
Nic_17	26	1	2	154	699	38	255
Nic_11	13	2	2	45	11	51	163
Nic_11	15	2	2	68	56	46	17
Nic_11	16	2	2	2746	98	21	49
Nic_11	17	2	2	642	160	63	134
Nic_11	18	2	2	395	610	2	48
Nic_17	28	2	2	74	147	927	20
Nic_17	33	2	2	111	148	117	66
Nic_17	34	2	2	8	506	31	22
Nic_17	35	2	2	1	74	4	76
		(1=GFP; 2=hM4Di)	(1=Male; 2=Female)
