# Supplementary material for: Role of anterior insula cortex in context-induced relapse of nicotine-seeking
Source: eLife. 2022 May 10;11:e75609. doi: 10.7554/eLife.75609 (PMC9119676; doi:10.7554/eLife.75609)
Supplement: Figure 5—source data 1. [file elife-75609-fig5-data1.xlsx]

## Sheet: 5B
Self-administration (Exp. 5 - AI extinction group)
Experiment	Rat	Group	SEX	inf_1	inf_2	inf_3	inf_4	inf_5	inf_6	inf_7	inf_8	inf_9	inf_10	inf_11	inf_12	inf_13	act_1	act_2	act_3	act_4	act_5	act_6	act_7	act_8	act_9	act_10	act_11	act_12	act_13	inact_1	inact_2	inact_3	inact_4	inact_5	inact_6	inact_7	inact_8	inact_9	inact_10	inact_11	inact_12	inact_13
Nic_11	7	1	1	3	2	6	2	7	5	2	1	1	1	0	4	3	5	2	6	2	10	13	5	2	3	3	2	12	10	1	2	2	4	6	7	2	4	0	4	2	10	2
Nic_11	8	1	1	2	1	0	1	1	0	1	0	1	1	0	3	3	4	1	0	1	1	0	2	0	3	3	1	9	9	0	5	6	5	2	2	2	2	3	1	9	1	12
Nic_11	9	1	1	2	1	0	1	0	0	1	0	1	1	0	3	3	5	1	0	1	0	1	3	0	3	3	0	9	9	4	1	1	2	3	2	1	0	0	0	0	1	3
Nic_11	10	1	1	6	1	5	2	6	4	10	5	4	5	12	11	12	11	2	14	10	12	16	27	17	16	18	43	37	52	5	8	2	1	0	4	4	3	2	2	1	2	3
Nic_11	11	1	1	14	9	7	7	4	9	15	6	14	12	16	20	25	30	15	15	17	9	21	34	18	67	45	55	73	91	12	9	5	4	8	8	6	4	10	12	13	13	13
Nic_11	12	1	1	15	13	15	3	6	4	8	1	2	1	1	11	13	33	39	20	6	11	11	24	3	10	8	5	41	44	16	9	18	6	15	3	17	2	9	8	6	12	20
Nic_17	3	1	1	8	5	7	3	11	3	1	4	3	1	4	1	3	13	11	12	7	21	8	3	10	13	4	16	3	11	9	10	12	8	7	5	3	7	8	2	2	2	3
Nic_17	12	2	1	15	13	18	13	15	6	12	12	5	4	11	11	14	24	21	26	35	21	18	32	33	20	16	44	49	50	11	4	6	6	13	10	9	15	12	13	9	25	13
Nic_11	1	2	1	4	2	5	1	2	0	2	0	1	1	1	3	3	4	3	5	1	2	0	7	1	3	3	3	9	9	4	3	8	4	1	0	0	0	0	1	1	4	5
Nic_11	2	2	1	8	6	1	4	4	9	2	13	5	8	5	12	11	11	7	1	6	5	24	6	48	19	30	26	67	46	5	6	5	12	9	17	3	19	7	25	8	16	15
Nic_11	4	2	1	11	11	4	11	13	11	5	8	3	9	3	2	9	17	18	7	16	20	30	14	17	11	35	13	11	28	10	7	1	6	3	10	4	3	3	8	3	4	12
Nic_11	5	2	1	16	18	10	16	8	16	11	15	4	16	6	9	13	26	25	12	19	10	41	31	37	16	56	21	28	42	7	13	8	12	7	23	10	21	7	13	1	9	11
Nic_11	6	2	1	11	5	6	6	5	6	5	9	6	7	5	6	12	18	8	12	10	8	20	15	24	27	32	23	24	39	2	6	6	9	8	10	12	5	8	7	2	3	19
Nic_11	19	1	2	5	0	3	2	3	6	4	6	5	6	8	7	10	5	0	5	5	3	12	9	14	19	22	30	30	39	3	4	14	5	17	24	17	17	14	13	50	17	25
Nic_11	20	1	2	4	2	7	12	13	7	10	6	6	13	14	14	11	5	2	9	18	17	19	23	19	22	54	53	53	36	5	2	8	20	15	17	23	12	23	42	33	28	21
Nic_11	21	1	2	6	1	2	2	2	4	4	4	5	4	6	8	8	7	1	3	2	3	10	8	8	19	20	24	31	27	3	5	7	6	10	7	20	11	20	15	17	15	16
Nic_11	22	1	2	8	10	6	2	11	1	5	3	9	13	14	16	16	12	15	11	2	16	3	13	7	32	44	50	51	60	10	22	22	6	13	11	6	3	11	8	18	14	16
Nic_11	23	1	2	8	9	11	10	9	5	16	13	14	10	16	8	11	9	15	21	21	12	17	37	31	67	58	66	33	43	19	6	4	11	6	19	9	3	27	11	22	23	11
Nic_11	24	1	2	19	14	13	15	17	9	12	6	11	14	17	11	14	29	29	16	18	28	25	27	17	39	51	58	40	51	19	12	10	10	13	11	16	9	10	27	33	22	31
Nic_17	22	1	2	24	28	37	15	20	17.5	15	11	15	4	11	21	14	36	35	43	20	32	33.5	35	24	47	17	37	69	48	24	16	9	4	6	84	9	14	11	6	9	28	13
Nic_17	25	1	2	19	27	12	14	11	7	3	1	0	4	2	2	10	23	38	17	15	16	12	6	3	2	16	8	10	41	15	21	10	9	9	3	7	6	11	22	10	14	14
Nic_17	26	1	2	21	13	8	10	4	5	5	4	5	5	5	6	14	27	31	16	11	10	11	14	16	23	19	19	22	56	30	33	23	16	13	20	18	19	30	34	25	24	47
Nic_17	28	2	2	2	4	9	8	4	20	4	3	3	3	4	5	1	3	7	19	12	8	44	11	8	10	17	17	20	6	9	7	20	13	11	26	5	6	5	18	11	35	5
Nic_17	33	2	2	9	15	21	11	0	4	5	11	7	7	5	13	10	16	23	32	13	0	13	13	27	27	25	21	51	35	15	7	17	9	0	3	3	15	6	2	7	7	5
Nic_17	34	2	2	23	9	6	8	11	1	6	9	14	9	8	12	16	30	13	9	8	14	3	14	21	47	38	28	45	55	16	12	6	9	11	6	11	10	8	5	11	8	9
Nic_17	35	2	2	11	14	25	25	21	25	28	24	14	16	22	23	23	13	18	36	29	26	55	62	56	52	53	76	81	76	6	9	13	13	7	13	7	10	8	18	25	11	11
Nic_11	13	2	2	6	5	6	4	6	1	2	7	3	9	9	11	10	6	7	9	4	6	3	5	14	11	32	36	40	43	3	8	21	12	17	11	2	7	6	11	10	16	8
Nic_11	15	2	2	7	4	6	6	8	16	20	23	22	27	29	32	33	7	5	7	9	9	53	65	67	94	101	119	133	125	23	5	9	17	18	36	15	22	27	33	26	25	24
Nic_11	16	2	2	5	4	1	3	5	1	7	3	4	4	3	8	11	7	6	3	8	8	5	16	14	15	12	12	31	38	7	5	4	0	8	1	4	8	4	13	3	8	9
Nic_11	17	2	2	12	10	11	12	13	12	6	11	8	11	15	17	12	28	18	20	20	20	31	14	28	33	42	48	78	45	19	17	13	7	8	12	7	9	10	32	31	53	27
Nic_11	18	2	2	17	12	18	14	14	13	12	14	8	10	14	15	10	27	29	39	29	22	35	32	36	31	33	51	54	34	14	11	10	11	11	7	13	9	17	17	21	16	23
		(1=GFP; 2=hM4Di)	(1=Male; 2=Female)

## Sheet: 5C
Extinction (Exp. 5 - AI extinction group)
Experiment	Rat	Group	SEX	act_1	act_2	act_3	act_4	act_5	act_6	act_7	act_8	inact_1	inact_2	inact_3	inact_4	inact_5	inact_6	inact_7	inact_8
Nic_11	7	1	1	23	18	25	10	16	1	13	2	14	22	14	12	15	3	16	3
Nic_11	8	1	1	1	0	4	2	1	2	3	2	3	4	9	8	7	9	9	3
Nic_11	9	1	1	3	3	14	10	12	5	3	1	3	8	11	5	6	3	3	1
Nic_11	10	1	1	16	23	6	10	11	6	8	9	7	1	1	2	3	2	1	1
Nic_11	11	1	1	31	2	3	9	12	9	6	2	18	5	3	7	10	15	9	5
Nic_11	12	1	1	13	27	13	4	5	1	1	0	5	3	7	10	10	2	7	1
Nic_17	3	1	1	14	6	6	15	6	15	12	14	8	10	10	7	9	8	5	3
Nic_11	1	2	1	4	25	20	21	20	12	14	22	8	21	5	13	22	4	4	9
Nic_11	2	2	1	34	40	24	24	41	3	18	17	14	25	6	7	18	8	10	8
Nic_11	4	2	1	6	7	4	2	15	1	5	7	7	4	6	1	5	1	2	1
Nic_11	5	2	1	33	43	11	22	23	8	5	11	14	14	11	22	31	6	6	13
Nic_11	6	2	1	16	23	4	11	16	10	8	8	9	4	4	4	10	1	1	6
Nic_17	12	2	1	34	27	27	39	11	9	9	4	12	13	13	15	11	4	8	3
Nic_11	19	1	2	28	25	59	28	44	15	44	9	9	13	21	7	9	6	27	4
Nic_11	20	1	2	88	63	112	29	51	33	55	22	66	29	53	15	19	16	21	15
Nic_11	21	1	2	41	25	28	14	25	10	14	12	9	14	10	11	15	4	11	3
Nic_11	22	1	2	13	12	10	15	13	4	12	6	5	20	9	6	10	8	11	10
Nic_11	23	1	2	43	19	15	15	47	4	14	5	16	20	14	12	12	18	8	3
Nic_11	24	1	2	28	10	15	4	10	4	7	5	25	17	17	11	22	13	13	6
Nic_17	22	1	2	40	23	7	18	63	41	33	26	16	5	2	10	6	2	1	3
Nic_17	25	1	2	36	31	11	38	50	21	24	18	13	20	4	10	5	10	9	5
Nic_17	26	1	2	11	26	21	6	7	9	9	4	15	22	33	26	7	5	5	7
Nic_11	13	2	2	23	31	22	16	13	3	14	12	61	12	17	9	22	10	6	6
Nic_11	15	2	2	52	43	27	25	20	7	9	8	20	20	36	11	28	18	13	10
Nic_11	16	2	2	13	11	3	13	7	7	4	5	2	10	4	1	5	1	1	2
Nic_11	17	2	2	20	16	13	11	12	4	3	7	21	31	28	12	25	7	11	10
Nic_11	18	2	2	13	11	10	9	4	7	3	6	5	9	9	5	8	4	1	8
Nic_17	28	2	2	16	13	8	12	14	7	2	4	11	32	17	13	12	8	8	9
Nic_17	33	2	2	17	57	56	47	54	25	15	18	14	13	14	11	7	9	3	9
Nic_17	34	2	2	14	33	46	28	43	34	16	15	21	39	14	11	8	11	4	15
Nic_17	35	2	2	35	38	38	34	39	32	29	28	33	18	18	14	13	21	12	8
		(1=GFP; 2=hM4Di)	(1=Male; 2=Female)

## Sheet: 5D
Test (Exp. 5 - AI extinction group)
Experiment	Rat	Group	SEX	EXT_Inactive	EXT_Active	NIC_Inactive	NIC_Active
Nic_11	7	1	1	11	4	4	3
Nic_11	8	1	1	4	3	8	8
Nic_11	9	1	1	8	2	5	1
Nic_11	10	1	1	6	14	3	31
Nic_11	11	1	1	8	3	7	23
Nic_11	12	1	1	1	7	7	21
Nic_17	3	1	1	9	28	5	41
Nic_11	1	2	1	10	12	18	6
Nic_11	2	2	1	9	17	8	12
Nic_11	4	2	1	1	0	2	9
Nic_11	5	2	1	7	12	8	16
Nic_11	6	2	1	5	4	6	14
Nic_17	12	2	1	4	18	40	16
Nic_11	19	1	2	0	11	9	22
Nic_11	20	1	2	14	27	12	39
Nic_11	21	1	2	4	10	10	24
Nic_11	22	1	2	11	14	5	28
Nic_11	23	1	2	6	2	11	27
Nic_11	24	1	2	7	5	9	14
Nic_17	22	1	2	6	24	2	42
Nic_17	25	1	2	6	24	14	64
Nic_17	26	1	2	7	11	16	42
Nic_11	13	2	2	4	9	6	21
Nic_11	15	2	2	11	7	21	28
Nic_11	16	2	2	2	1	3	7
Nic_11	17	2	2	3	3	5	14
Nic_11	18	2	2	8	3	4	17
Nic_17	28	2	2	4	4	8	5
Nic_17	33	2	2	11	10	4	14
Nic_17	34	2	2	17	16	9	10
Nic_17	35	2	2	4	10	17	20
		(1=GFP; 2=hM4Di)	(1=Male; 2=Female)
